# Supplementary material
Source: PubMed Central journal article supplement (PMC8349799)
Supplement: NIHMS1697462-supplement-Supp_Materials.pdf [file NIHMS1697462-supplement-Supp_Materials.pdf]

# THE LANCET

## Respiratory Medicine

### Supplementary appendix

This appendix formed part of the original submission and has been peer reviewed. We post it as supplied by the authors.

Supplement to: O Cobb C, Jonathan Foulds J, Yen M-S, et al. Effect of an electronic nicotine delivery system with 0, 8, or 36 mg/mL liquid nicotine versus a cigarette substitute on tobacco-related toxicant exposure: a four-arm, parallel-group, randomised, controlled trial. *Lancet Respir Med* 2021; published online April 12. [http://dx.doi.org/10.1016/S2213-2600\(21\)00022-9](http://dx.doi.org/10.1016/S2213-2600(21)00022-9).



Table of Contents

|                                                                                                                                                                                               |    |
|-----------------------------------------------------------------------------------------------------------------------------------------------------------------------------------------------|----|
| Acknowledgements .....                                                                                                                                                                        | 5  |
| CSTP-Randomized Control Trial Methods Workgroup .....                                                                                                                                         | 7  |
| Data Safety Monitoring Board .....                                                                                                                                                            | 8  |
| Supplementary Methods .....                                                                                                                                                                   | 9  |
| Supplementary Results .....                                                                                                                                                                   | 11 |
| Figure S1. Study design schematic by week .....                                                                                                                                               | 13 |
| Figure S2: Adjusted urinary total NNAL using multiple imputation .....                                                                                                                        | 14 |
| Figure S3: Unadjusted and adjusted urinary total NNAL sensitivity analyses: Intent-to-treat and per-protocol .....                                                                            | 15 |
| Figure S4. Unadjusted and adjusted urinary total NNAL sensitivity analyses: baseline-carried-forward and last-observation-carried-forward .....                                               | 16 |
| Figure S5: Adjusted urinary cotinine using multiple imputation .....                                                                                                                          | 17 |
| Figure S6: Unadjusted and adjusted urinary cotinine sensitivity analyses: Intent-to-treat and per-protocol .....                                                                              | 18 |
| Figure S7: Unadjusted and adjusted urinary cotinine sensitivity analyses: Baseline-carried-forward and last-observation carried-forward .....                                                 | 19 |
| Figure S8: Adjusted exhaled carbon monoxide using multiple imputation .....                                                                                                                   | 20 |
| Figure S9: Unadjusted and adjusted exhaled carbon monoxide sensitivity analyses: Intent-to-treat and per-protocol .....                                                                       | 21 |
| Figure S10: Unadjusted and adjusted exhaled carbon monoxide sensitivity analyses: Baseline-carried-forward and last-observation-carried-forward .....                                         | 22 |
| Figure S11: Adjusted cigarettes smoked per day using multiple imputation .....                                                                                                                | 23 |
| Figure S12: Unadjusted and adjusted cigarettes per day sensitivity analyses: Intent-to-treat and per-protocol .....                                                                           | 24 |
| Figure S13: Unadjusted and adjusted cigarettes per day sensitivity analyses: Baseline-carried-forward and last-observation carried-forward .....                                              | 25 |
| Figure S14. Unadjusted study product use: intent-to-treat (missing assumed no use), intent-to-treat (only available data), per-protocol .....                                                 | 26 |
| Table S1. Detailed baseline characteristics .....                                                                                                                                             | 27 |
| Table S2. Detailed baseline characteristics by site .....                                                                                                                                     | 31 |
| Table S3. Detailed baseline characteristics by retention status .....                                                                                                                         | 35 |
| Table S4. Retention outcome pre/post randomisation including reasons for withdrawal by condition and study period .....                                                                       | 39 |
| Table S5. Summary of significance .....                                                                                                                                                       | 41 |
| Table S6. Estimated urinary total NNAL standardized by creatinine in unadjusted and adjusted mixed models using multiple imputation method .....                                              | 57 |
| Table S7. Estimated urinary total NNAL standardized by creatinine in unadjusted and adjusted mixed models using intent-to-treat method .....                                                  | 58 |
| Table S8. Estimated urinary total NNAL standardized by creatinine in unadjusted and adjusted mixed models using per-protocol method .....                                                     | 59 |
| Table S9. Estimated urinary total NNAL standardized by creatinine in unadjusted and adjusted mixed models using baseline-carried-forward method .....                                         | 60 |
| Table S10. Estimated urinary total NNAL standardized by creatinine in unadjusted and adjusted mixed models using last-observation-carried-forward method .....                                | 61 |
| Table S11. P-values for pairwise comparisons between conditions at each time point for urinary total NNAL standardized by creatinine using multiple imputation method .....                   | 62 |
| Table S12. P-values for pairwise comparisons between conditions at each time point for urinary total NNAL standardized by creatinine using intent-to-treat method .....                       | 64 |
| Table S13. P-values for pairwise comparisons between conditions at each time point for urinary total NNAL standardized by creatinine using per-protocol method .....                          | 66 |
| Table S14. P-values for pairwise comparisons between conditions at each time point for urinary total NNAL standardized by creatinine using baseline-carried-forward method .....              | 68 |
| Table S15. P-values for pairwise comparisons between conditions at each time point for urinary total NNAL standardized by creatinine using last-observation-carried-forward method .....      | 70 |
| Table S16. P-values for pairwise comparisons relative to baseline within each condition for urinary total NNAL standardized by creatinine using multiple imputation method .....              | 72 |
| Table S17. P-values for pairwise comparisons relative to baseline within each condition for urinary total NNAL standardized by creatinine using intent-to-treat method .....                  | 73 |
| Table S18. P-values for pairwise comparisons relative to baseline within each condition for urinary total NNAL standardized by creatinine using per-protocol method .....                     | 74 |
| Table S19. P-values for pairwise comparisons relative to baseline within each condition for urinary total NNAL standardized by creatinine using baseline-carried-forward method .....         | 75 |
| Table S20. P-values for pairwise comparisons relative to baseline within each condition for urinary total NNAL standardized by creatinine using last-observation-carried-forward method ..... | 76 |
| Table S21. Estimated urinary cotinine standardized by creatinine in unadjusted and adjusted mixed models using multiple imputation method .....                                               | 77 |
| Table S22. Estimated urinary cotinine standardized by creatinine in unadjusted and adjusted mixed models using intent-to-treat method .....                                                   | 78 |
| Table S23. Estimated urinary cotinine standardized by creatinine in unadjusted and adjusted mixed models using per-protocol method .....                                                      | 79 |
| Table S24. Estimated urinary cotinine standardized by creatinine in unadjusted and adjusted mixed models using baseline-carried-forward method .....                                          | 80 |
| Table S25. Estimated urinary cotinine standardized by creatinine in unadjusted and adjusted mixed models using last-observation-carried-forward method .....                                  | 81 |
| Table S26. P-values for pairwise comparisons between conditions at each time point for urinary cotinine standardized by creatinine using multiple imputation method .....                     | 82 |
| Table S27. P-values for pairwise comparisons between conditions at each time point for urinary cotinine standardized by creatinine using intent-to-treat method .....                         | 84 |
| Table S28. P-values for pairwise comparisons between conditions at each time point for urinary cotinine standardized by creatinine using per-protocol method .....                            | 86 |

|                                                                                                                                                                                             |     |
|---------------------------------------------------------------------------------------------------------------------------------------------------------------------------------------------|-----|
| Table S29. P-values for pairwise comparisons between conditions at each time point for urinary cotinine standardized by creatinine using baseline-carried-forward method .....              | 88  |
| Table S30. P-values for pairwise comparisons between conditions at each time point for urinary cotinine standardized by creatinine using last-observation-carried-forward method .....      | 90  |
| Table S31. P-values for pairwise comparisons relative to baseline within each condition for urinary cotinine standardized by creatinine using multiple imputation method .....              | 92  |
| Table S32. P-values for pairwise comparisons relative to baseline within each condition for urinary cotinine standardized by creatinine using intent-to-treat method.....                   | 93  |
| Table S33. P-values for pairwise comparisons relative to baseline within each condition for urinary cotinine standardized by creatinine using per-protocol method.....                      | 94  |
| Table S34. P-values for pairwise comparisons relative to baseline within each condition for urinary cotinine standardized by creatinine using baseline-carried-forward method.....          | 95  |
| Table S35. P-values for pairwise comparisons relative to baseline within each condition for urinary cotinine standardized by creatinine using last-observation-carried-forward method ..... | 96  |
| Table S36. Estimated mean exhaled carbon monoxide in unadjusted and adjusted mixed models using multiple imputation method .....                                                            | 97  |
| Table S37. Estimated mean exhaled carbon monoxide in unadjusted and adjusted mixed models using intent-to-treat method .....                                                                | 98  |
| Table S38. Estimated mean exhaled carbon monoxide in unadjusted and adjusted mixed models using per-protocol method .....                                                                   | 99  |
| Table S39. Estimated mean exhaled carbon monoxide in unadjusted and adjusted mixed models using baseline-carried-forward method .....                                                       | 100 |
| Table S40. Estimated mean exhaled carbon monoxide in unadjusted and adjusted mixed models using last-observation-carried-forward method .....                                               | 101 |
| Table S41. P-values for pairwise comparisons between conditions at each time point for exhaled carbon monoxide using multiple imputation method .....                                       | 102 |
| Table S42. P-values for pairwise comparisons between conditions at each time point for exhaled carbon monoxide using intent-to-treat method .....                                           | 105 |
| Table S43. P-values for pairwise comparisons between conditions at each time point for exhaled carbon monoxide using per-protocol method .....                                              | 108 |
| Table S44. P-values for pairwise comparisons between conditions at each time point for exhaled carbon monoxide using baseline-carried-forward method .....                                  | 111 |
| Table S45. P-values for pairwise comparisons between conditions at each time point for exhaled carbon monoxide using last-observation-carried-forward method .....                          | 114 |
| Table S46. P-values for pairwise comparisons relative to baseline within each condition for exhaled carbon monoxide using multiple imputation method .....                                  | 117 |
| Table S47. P-values for pairwise comparisons relative to baseline within each condition for exhaled carbon monoxide using intent-to-treat method .....                                      | 118 |
| Table S48. P-values for pairwise comparisons relative to baseline within each condition for exhaled carbon monoxide using per-protocol method .....                                         | 119 |
| Table S49. P-values for pairwise comparisons relative to baseline within each condition for exhaled CO using baseline-carried-forward method .....                                          | 120 |
| Table S50. P-values for pairwise comparisons relative to baseline within each condition for exhaled carbon monoxide using last-observation-carried-forward method.....                      | 121 |
| Table S51. Estimated mean cigarettes smoked per day in unadjusted and adjusted mixed models using multiple imputation method .....                                                          | 122 |
| Table S52. Estimated mean cigarettes smoked per day in unadjusted and adjusted mixed models using intent-to-treat method.....                                                               | 123 |
| Table S53. Estimated mean cigarettes smoked per day in unadjusted and adjusted mixed models using per-protocol method .....                                                                 | 124 |
| Table S54. Estimated mean cigarettes smoked per day in unadjusted and adjusted mixed models using baseline-carried forward method .....                                                     | 125 |
| Table S55. Estimated mean cigarettes smoked per day in unadjusted and adjusted mixed models using last-observation-carried-forward method .....                                             | 126 |
| Table S56. P-values for pairwise comparisons between conditions at each time point for cigarettes smoked per day using multiple imputation method .....                                     | 127 |
| Table S57. P-values for pairwise comparisons between conditions at each time point for cigarettes smoked per day using intent-to-treat method .....                                         | 130 |
| Table S58. P-values for pairwise comparisons between conditions at each time point for cigarettes smoked per day using per-protocol method .....                                            | 133 |
| Table S59. P-values for pairwise comparisons between conditions at each time point for cigarettes smoked per day using baseline-carried-forward method .....                                | 136 |
| Table S60. P-values for pairwise comparisons between conditions at each time point for cigarettes smoked per day using last-observation-carried-forward method .....                        | 139 |
| Table S61. P-values for pairwise comparisons relative to baseline within each condition for cigarettes smoked per day using multiple imputation method .....                                | 142 |
| Table S62. P-values for pairwise comparisons relative to baseline within each condition for cigarettes smoked per day using intent-to-treat method .....                                    | 143 |
| Table S63. P-values for pairwise comparisons relative to baseline within each condition for cigarettes smoked per day using per-protocol method .....                                       | 144 |
| Table S64. P-values for pairwise comparisons relative to baseline within each condition for cigarettes smoked per day using baseline-carried-forward method .....                           | 145 |
| Table S65. P-values for pairwise comparisons relative to baseline within each condition for cigarettes smoked per day using last-observation-carried-forward method.....                    | 146 |
| Table S66. Study product use percentages using intent-to-treat method (with assumption of no use to missing study product usage logs) .....                                                 | 147 |
| Table S67. Study product use percentages using intent-to-treat method (with no assumption on missing study product usage logs) .....                                                        | 148 |
| Table S68. Study product use percentages using per-protocol method.....                                                                                                                     | 149 |
| Table S69. P-values of between-condition comparisons for study product use percentages using intent-to-treat method (with assumption of no use to missing study product usage logs).....    | 150 |

|                                                                                                                                                                                              |     |
|----------------------------------------------------------------------------------------------------------------------------------------------------------------------------------------------|-----|
| Table S70. P-values of between-condition comparisons for study product use percentages using intent-to-treat method (with no assumption on missing study product usage logs) .....           | 151 |
| Table S71. P-values of between-condition comparisons for study product use percentages using per-protocol method.....                                                                        | 152 |
| Table S72. P-values of relative to week 1 comparisons for study product use percentages using intent-to-treat method (with assumption of no use to missing study product usage logs).....    | 153 |
| Table S73. P-values of relative to week 1 comparisons for study product use percentages using intent-to-treat method (with no assumption of no use to missing study product usage logs)..... | 154 |
| Table S74. P-values of relative to week 1 comparisons for study product use percentages using per-protocol method .....                                                                      | 155 |
| Table S75. Summary of adverse events .....                                                                                                                                                   | 156 |
| Table S76. Number of participants with an event .....                                                                                                                                        | 161 |
| Table S77. Count of serious and severe adverse events .....                                                                                                                                  | 167 |
| Table S78. Description of serious and severe events .....                                                                                                                                    | 168 |
| Complete Statistical Analysis Plan Documentation .....                                                                                                                                       | 172 |
| References .....                                                                                                                                                                             | 188 |

## **Acknowledgements**

Virginia Commonwealth University

Thomas Eissenberg, PhD

Caroline O. Cobb, PhD

Phoebe Brosnan, MA

Nadia Chowdhury, BS

Parker Webster, BSN

Tyler Brunet, MS

Jacob T. Graham, BS

Alexa A. Lopez, PhD

Miao-Shan Yen, MS

Le Kang, PhD

Mishaal Khan, BS

Nancy Sey, BS

Sam Patel, BS

Matthew Miera, BS

Alyssa K. Rudy, MS

Thokozeni Lipato, MD

Shumei Sun, PhD

Matthew Halquist, PhD

Alison Montpetit, PhD

Susan Teasley

Jennifer Economy

Penn State University

Jonathan Foulds, PhD

Erin Hammett, MS

Sharilee Hrabovsky, DEd

Breianna L. Hummer, MS

Courtney Lester, BS

John P. Richie, Jr., PhD

Susan Veldheer, DEd

Jessica M. Yingst, DrPH

Jennifer Modesto, MS

Richard Sargent, BA

Alyse Fazzi, PharmD

Sophia I. Allen, PhD

Lisa Reinhart, MS

Christopher Sciamanna, MD

The University of Auckland

Christopher Bullen, PhD

Wake Forest University

Eric Donny, PhD

## **CSTP-Randomized Control Trial Methods Workgroup**

Virginia Commonwealth University

Thomas Eissenberg, PhD

Caroline O. Cobb, PhD

Phoebe Brosnan, MA

Nadia Chowdhury, BS

Jacob T. Graham, BS

Alexa A. Lopez, PhD

Miao-Shan Yen, MS

Le Kang, PhD

Shumei Sun, PhD

Thokozeni Lipato, MD

Penn State University

Jonathan Foulds, PhD

Erin Hammett, MS

Sharilee Hrabovsky, DEd

Breiana L. Hummer, MS

Courtney Lester, BS

John P. Richie, Jr., PhD

Susan Veldheer, DEd

Jessica M. Yingst, DrPH

Christopher Sciamanna, MD

Sophia I. Allen, PhD

The University of Auckland

Christopher Bullen, PhD



## **Data Safety Monitoring Board**

Dace Svikis, PhD (Chair), Professor, Departments of Psychology, Psychiatry, and Obstetrics/Gynecology, Virginia Commonwealth University

Leo Dunn, MD, Professor, Department of Obstetrics and Gynecology, Virginia Commonwealth University

Adam Sima, PhD, Associate Professor, Department of Biostatistics, Virginia Commonwealth University

Erika F.H. Saunders, MD, Associate Professor, Chair, Department of Psychiatry, Penn State College of Medicine

## Supplementary Methods

### Contributions of authors

JF, TE, CB, and SV conceived the original idea for the trial and sought and obtained funding. JF, TE, CB, SV, JY, M-SY, AL, and CC contributed to the writing of the study protocol. JF, TE, M-SY, CC, LK, and SS (member of the CSTP-Randomized Control Trial Methods Workgroup) contributed to the writing of the statistical analysis plan. M-SY did all data analyses with consultation from LK, CC, and SS. CC and M-SY accessed and verified the underlying data. The first draft of the paper was written by CC with input from all co-authors. CC is the guarantor for this paper. All authors read and approved the final manuscript. All authors had full access to all the data in the study and had final responsibility for the decision to submit for publication. Members of the CSTP-Randomized Control Trial Methods Workgroup contributed to designing the study protocol and/or collecting the data.

### Study Protocol and Statistical Analysis Plan

A complete study protocol and summary of changes made after initiation of the study is available by request. A published version of the study protocol and original statistical analysis plan is publically available.<sup>1</sup> A copy of the final statistical analysis plan is found at the end of this appendix.

### Study products and blinding

Electronic nicotine delivery system (ENDS) liquid (0, 8, and 36 mg/ml) was purchased from an ENDS retailer located in Richmond, VA and had nicotine concentration verified by an independent laboratory prior to use (BLQ for 0 mg/ml; +/-1 mg/ml for 8 mg/ml; +/- 2 mg/ml for 36 mg/ml). Following nicotine concentration verification, ENDS liquid was split between sites and shipped as needed for dispensation.

Cartomizer preparation and dispensation procedures were identical between sites and utilized paper-based logs as well as electronic records to ensure blinding as well as accurate product assignment. Administrative staff with no participant contact prepared all cartomizers for dispensation (1 mL of liquid per cartomizer). All filled cartomizers were stored with the cartomizer mouth-end upright in child-proof plastic vials (7 cartomizers per vial). Filled cartomizers/vials were discarded after 27 days to ensure cartomizers more than 4 weeks old were not given to participants. This procedure was used to as a quality control measure considering some study visits were approximately 4 weeks apart. When dispensed, child-proof plastic bottles (not cartomizers) were labeled with an adhesive sticker by administrative staff that indicated participant ID, liquid flavor, visit number, and date of cartomizer expiration.

Following randomisation to the cigarette substitute condition, researchers reviewed and provided participants with a copy of their study product manual along with two cigarette substitutes. Manual instructions also included the following text: "For best results - Practice using your cigarette substitute (including trying different airflow settings) to find a method that works best for you."

Following randomisation to an ENDS condition, researchers reviewed and provided participants with a copy of their study product manual along with two pre-charged ENDS batteries, a charger, and carrying case. The ENDS manual provided detailed information on what participants were given, how to set up the ENDS (i.e., attach/replace the cartomizer, use the button to activate the heating element, safely store their study product), how to maintain their daily tobacco use diary, and some potential ENDS related side effects. Manual instructions also included the following text: "For best results - Practice using your ECIG to find a method that works best for you, consistent with local rules and regulations regarding clean indoor air." Following manual review, researchers then asked participants to sample two cartomizers corresponding to tobacco and menthol flavor of their assigned condition (i.e., liquid nicotine concentration was consistent with condition assigned). Participants were informed that they would receive the selected ENDS flavor for the duration of the study. Following sampling and flavor selection, researchers retrieved the participant's full supply of cartomizers for that visit.

Of note all participants had the opportunity to experience the alternate study product to which they were randomised at the 24-week visit (end of the intervention period). Individuals initially randomised to an ENDS condition received two cigarette substitutes and a study product manual at week 24. Individuals initially randomised to a cigarette substitute condition were provided with 21 cartomizers (always at 0 mg/ml; flavor consistent with cigarette menthol preference), 1 ENDS battery/charger/carrying case, and a study product manual.

Each ENDS+liquid concentration was tested in a clinical laboratory study using the same ENDS, cartomizer, and liquid with identical characteristics.<sup>1</sup> When experienced END users were asked to take 10 puffs, 8 mg/ml liquid resulted in a boost of 8.2 ng/ml (SD=7.8), and 36 mg/ml liquid resulted in a boost of 17.9 ng/ml (SD=17.2). When ENDS-naive cigarette smokers asked to take 10 puffs, 8 mg/ml liquid did not result in a significant increase in plasma nicotine relative to baseline, and 36 mg/ml liquid resulted in a boost of 6.8 ng/ml (SD=7.1).<sup>2</sup>

### Measures

The following measures were administered during 1 or more of the 12 in-person visits: nicotine withdrawal symptoms<sup>3,4</sup>, environmental smoke exposure<sup>5</sup>, cigarette and study product dependence (°; scores range from 0 to 20, with higher values indicating greater dependence), drug and alcohol use<sup>7,8</sup>, mood/stress<sup>9-11</sup>, respiratory/cardiovascular disease risk factors<sup>12,13</sup>, study product evaluation items (°<sup>14</sup>).

### Biological Measures

Urinary total NNAL and cotinine analyses were performed using validated methods performed by the Bioanalytical Shared Resource Laboratory at Virginia Commonwealth University.

### Statistical Analysis

We first examined all baseline demographics and participant characteristics to identify any baseline imbalances after randomisation (see Table S1). Discrete variables were summarized by frequencies with percentages and compared using Chi-squared test or Fisher's exact test when appropriate. Continuous

variables were summarized by mean with standard deviation, median with interquartile range, or geometric mean with 95% confidence interval, and compared using one-way ANOVA or nonparametric Kruskal-Wallis test. Normality of data was examined using graphical methods (e.g., Q-Q plot) or Kolmogorov-Smirnov test. The Box-Cox transformation was applied to non-normal data including urinary total NNAL and urinary cotinine (both were standardized by creatinine prior to transformation).

Our analysis sample included four outcomes – urinary total NNAL, urinary cotinine, exhaled carbon monoxide (CO) and cigarettes smoked per day collected during the intervention period (week 0-24), and participant characteristics collected at baseline (week 0, see details in Table S1). We employed multiple imputation to impute missing values in both the four outcomes and the participant characteristics included in the adjusted analysis models.

The multiple imputation included 2 steps. First, to account for reasons contributed to attrition, we examined the association between missingness of urinary total NNAL (primary outcome) and baseline participant characteristics described in Table S1 using Chi-squared test or Fisher’s exact test. Second, baseline characteristics significantly associated with NNAL missingness were included in a fully conditional regression model<sup>15</sup> along with several covariates that we deemed essential, including study site, gender, age and race/ethnicity. Detailed covariates are listed in Table A below. Five completed imputation data sets were created by the fully conditional model and each consists of completed outcomes (urinary total NNAL and urinary cotinine at weeks 0, 4, 12 and 24; exhaled CO and cigarettes smoked per day at weeks 0, 1, 2, 4, 8, 12, 16, 20 and 24) and completed baseline covariates.

After missing value imputation, linear mixed-effect models were used for both primary unadjusted analyses and secondary adjusted analyses to assess the variations of the outcomes across conditions and over time. Time, condition, and their interaction were included as fixed effects in both primary unadjusted analyses and secondary adjusted analyses. A random effect was included to account for within-participant dependence. In the adjusted model, study site, gender, age and race/ethnicity were always included as covariates of interest. Additional outcome-specific covariates included the adjusted models were selected through a stepwise model selection procedure and are listed in Table B below. Linear mixed-effect models were applied to all five imputation data sets. Results from each data set were pooled to produce inferential results (SAS procedure name: PROC MIANALYZE).

Table A. Covariates included in fully conditional regression model

| <b>Covariates</b>                                          |                                                                                                                                                                                                                                                                                                                                                                                                                                                                                                                                                                                                                                                                                                                                                                                                                                               |
|------------------------------------------------------------|-----------------------------------------------------------------------------------------------------------------------------------------------------------------------------------------------------------------------------------------------------------------------------------------------------------------------------------------------------------------------------------------------------------------------------------------------------------------------------------------------------------------------------------------------------------------------------------------------------------------------------------------------------------------------------------------------------------------------------------------------------------------------------------------------------------------------------------------------|
| <b>Fully conditional regression model for all outcomes</b> | Study site, gender, age, race/ethnicity, education, total household income, age of smoking initiation, week 0 environmental smoke score, week 0 urinary total NNAL (transformed, pg/mg creatinine), week 0 urinary cotinine (transformed, ng/mg creatinine), week 0 exhaled CO, week 0 cigarettes smoked per day, week 0 body mass index, week 0 height, week 0 weight, week 0 hip circumference, week 0 waist circumference, week 0 diastolic blood pressure, week 0 Center for Epidemiologic Studies Depression Scale score, week 0 Clinical Chronic Obstructive Pulmonary Disease score, week 0 partial INTERHEART non-laboratory score, week 0 Kessler K6 score, week 0 Penn State Cigarette Dependence Index score, week 0 Perceived Stress Scale score, week 0 forced expiratory volume in one second, and week 0 forced vital capacity |

Table B. Covariates included in secondary adjusted analyses

| <b>Covariates included in secondary adjusted analyses</b> |                                                                                                                                                                                                                                                                                                                                                                                                                                       |
|-----------------------------------------------------------|---------------------------------------------------------------------------------------------------------------------------------------------------------------------------------------------------------------------------------------------------------------------------------------------------------------------------------------------------------------------------------------------------------------------------------------|
| <b>Adjusted model for urinary total NNAL</b>              | Study site, gender, age, race/ethnicity, week 0 cigarettes smoked per day, week 0 forced expiratory volume in one second, and week 0 urinary total NNAL (pg/mg creatinine-transformed)                                                                                                                                                                                                                                                |
| <b>Adjusted model for urinary cotinine</b>                | Study site, gender, age, race/ethnicity, week 0 urinary cotinine (ng/mg creatinine-transformed), education level, week 0 environmental smoke score, week 0 partial INTERHEART non-laboratory score, week 0 forced expiratory volume in one second, week 0 forced vital capacity, and week 0 Penn State Cigarette Dependence Index score                                                                                               |
| <b>Adjusted model for exhaled CO</b>                      | Study site, gender, age, race/ethnicity, week 0 exhaled CO, week 0 cigarettes smoked per day, week 0 urinary total NNAL (pg/mg creatinine-transformed), week 0 body mass index, education level, total household income, age of smoking initiation, week 0 waist circumference, week 0 partial INTERHEART non-laboratory score, week 0 Penn State Cigarette Dependence Index score, and week 0 forced expiratory volume in one second |
| <b>Adjusted model for cigarettes smoked per day</b>       | Study site, gender, age, race/ethnicity, week 0 exhaled CO, week 0 cigarettes smoked per day, education level, week 0 Kessler K6 score, week 0 Penn State Cigarette Dependence Index score, and week 0 forced expiratory volume in one second                                                                                                                                                                                         |

Pairwise comparisons with Bonferroni adjustment were conducted 1) between conditions at each time point (6 comparisons; alpha=0.008) and 2) within conditions relative to week 0. Bonferroni adjusted alpha was 0.017 for comparisons relative to week 0 in urinary total NNAL and urinary cotinine (3 comparisons), and 0.006 for comparisons relative to week 0 in exhaled CO and CPD (8 comparisons).

Sensitivity analyses were performed under unadjusted and adjusted conditions, with or without missing data imputation. In the intent-to-treat (ITT) analysis, all available data was considered with no imputation on missing values. The per-protocol (PP) analysis only included participants who had the desired outcome completed at weeks 0, 4, 12 and 24. In the baseline-carried-forward (BCF) and the last-observation-carried-forward (LOCF) analyses, missing values were replaced with the week 0 observation and the last available observation of the participant, respectively.

A dichotomized outcome was defined to assess study product use (ENDS/CS) by using the 7-day TLFB data. Based on this latter measure, if participant reported no use of their study product in the past 7 days prior to the visit then study product use status for the visit was no use, otherwise the study product use status was yes. ITT analyses were performed, including with or without an assumption of no use for participants with missing 7-day TLFB data. Additionally, a PP analysis was performed using participants with available study product use status at weeks 0, 4, 12, and 24. Pairwise comparisons between conditions and relative to week 0 were conducted with appropriate Bonferroni adjustments.

## Supplementary Results

### Overview

Results of secondary adjusted analyses, sensitivity analyses, pairwise comparisons, and summary of adverse events are included in supplementary results.

Figures S3-14 present the estimates and 95% confidence intervals based on the mixed-effect models for secondary adjusted analyses and sensitivity analyses.

Table S3 compares the demographics and week 0 participant characteristics between participants who completed the study period (week 0-24) and who did not.

Table S4 details the retention and reasons for withdrawal over the trial.

Table S5 summarizes significant pairwise comparisons between conditions and relative to baseline for each outcome by analysis approach.

Tables S6-64 present the estimates, 95% confidence intervals and p-values of pairwise comparisons between conditions and relative to baseline within conditions for urinary total NNAL, urinary cotinine, exhaled CO, and cigarettes smoked per day.

Tables S66-74 present the percentages and p-values of pairwise comparisons between conditions and relative to baseline within conditions for study product use.

Tables S75-78 present a descriptive analysis of adverse events.

### Differences among multiple imputation, intention-to-treat and baseline-carried-forward analyses

To justify if missing not at random or informative missingness were observed in our data, we specifically compared the results from multiple imputation (MI), intent-to-treat (ITT) and baseline-carried-forward (BCF) analyses. ITT served as an analysis on all available data without assumption, and BCF served as the most conservative imputation of missing values.

#### Urinary Total NNAL

A significant difference between CS and 36 mg/ml at week 24 was consistently observed in adjusted models using MI, ITT, and BCF methods and was only found in MI unadjusted model. A significance difference between 0 mg/ml and 36 mg/ml at week 24 was only observed in BCF adjusted model but not in the other two methods. Compared to baseline (week 0), a significant difference at week 12 in 36 mg/ml was carried through week 24 in all three methods in unadjusted and adjusted models.

#### Urinary Cotinine

Adjusted models using ITT and BCF methods revealed a significant difference between 8 mg/ml and 36 mg/ml at week 4, but the adjusted model using MI method did not detect this difference. On the other hand, the significant difference between week 12 and baseline (week 0) in CS was only observed in MI adjusted model but not in the other two methods. None of the unadjusted models from the three methods detected the significant differences above. Relative to baseline (week 0), except models using BCF method, a significant difference between week 4 and baseline (week 0) in 8 mg/ml was carried through week 12 and week 24 based on MI and ITT methods. BCF was the only method which did not detect a relative to baseline (week 0) difference at week 24 but effects were consistent at earlier time points.

#### Exhaled carbon monoxide

Between condition significant differences in exhaled carbon monoxide were most prevalent between CS and 8 mg/ml, between CS and 36 mg/ml, between 0 and 8 mg/ml and between 0 and 36 mg/ml starting at the first post-randomization visit (week 1) to the last visit in the intervention period (week 24). Discrepancies in results among MI, ITT, and BCF methods were observed but no systematic differences were found with regards to the results inferences. Notable discrepancies included a significant difference between CS and 36 mg/ml at week 1 only found in MI unadjusted model and a significant difference between 0 mg/ml and 36 mg/ml at week 8 only found in BCF unadjusted model. A significant difference between CS and 36 mg/ml at week 2 was found using both ITT and BCF methods but not MI. Significant differences between 0 mg/ml and 8 mg/ml at week 4, and between 0 mg/ml and 36 mg/ml at week 24 were observed based on MI unadjusted model and BCF unadjusted/adjusted models but not ITT. BCF did not detect the significant difference between CS and 36 mg/ml at week 24, however, it was observed using MI unadjusted/adjusted models and ITT adjusted model.

Similarly, in the comparisons relative to baseline (week 0), no systematic shifts in the inferential results were observed among the three methods while small discrepancies were noted. For 8 mg/ml, all three methods found significant differences relative to baseline (week 0) in all following weeks except week 24. At week 24, exhaled carbon monoxide did not significantly differ from baseline (week 0) based on BCF method or based on MI unadjusted model. Additionally, BCF unadjusted model did not detect a significant difference between week 20 and baseline (week 0) for 8 mg/ml. For 36 mg/ml, all weeks following baseline (week 0) showed significant differences using MI, ITT, and BCF methods except week 16 in BCF unadjusted model. Significant differences relative to baseline (week 0) in CS at weeks 4 and 12 were observed based on the ITT method and MI adjusted model, but not BCF. A significant difference between week 2 and baseline (week 0) in 0 mg/ml in both unadjusted and adjusted models across methods were observed except BCF unadjusted model. A significant difference between week 1 and baseline (week 0) for 0 mg/ml was observed based on the ITT unadjusted model and BCF method, but not MI. BCF method did not detect the significant difference between week 4 and baseline (week 0) for 0 mg/ml but this significant difference was observed for both MI adjusted model and ITT method. The difference between week 8 and baseline (week 0) in 8 mg/ml was only significant using ITT method.

#### Cigarettes smoked per day

Compared to unadjusted models, more significant between-condition differences were observed in adjusted models regardless the analysis method used. Most prevalent significant differences were observed between CS and 0 mg/ml, between CS and 8 mg/ml and between CS and 36 mg/ml. All significant differences found based on MI method between CS and 36 mg/ml at weeks 1, 2, 4, 8, 12 and 16 were also able to be detected by ITT and BCF methods. Additionally, this significance was further carried through week 20 and week 24 in MI and ITT models. Significant differences between CS and 0 mg/ml at weeks 4, 8 and 16 were detected by both MI and ITT unadjusted models but not BCF. MI and ITT adjusted models further found significant differences at weeks 1, 2, 12, 20 and 24 in addition to significant differences above. BCF adjusted model only found significant differences between CS and 0 mg/ml at weeks 2, 4 and 8. ITT unadjusted/adjusted models and MI adjusted model detected significant differences between CS and 8 mg/ml at most weeks, but the difference only was observed at week 4 using MI unadjusted model. No significant differences between CS and 8 mg/ml were detected by BCF unadjusted model and BCF adjusted model only detected significances at weeks 2, 4 and 8.

In the pairwise comparisons relative to baseline (week 0), all three methods consistently detected significant differences relative to baseline (week 0) for all post-randomization time points within all conditions.

#### Adverse events

Detailed description of all adverse events, by number of events and by number of participants, is presented in Table S75 and Table S76. All serious adverse events were reported to be unrelated or unlikely to be related (Table S77). Table S78 presents a description of serious/severe events as well as withdrawal-related information.

Figure S1. Study design schematic by week

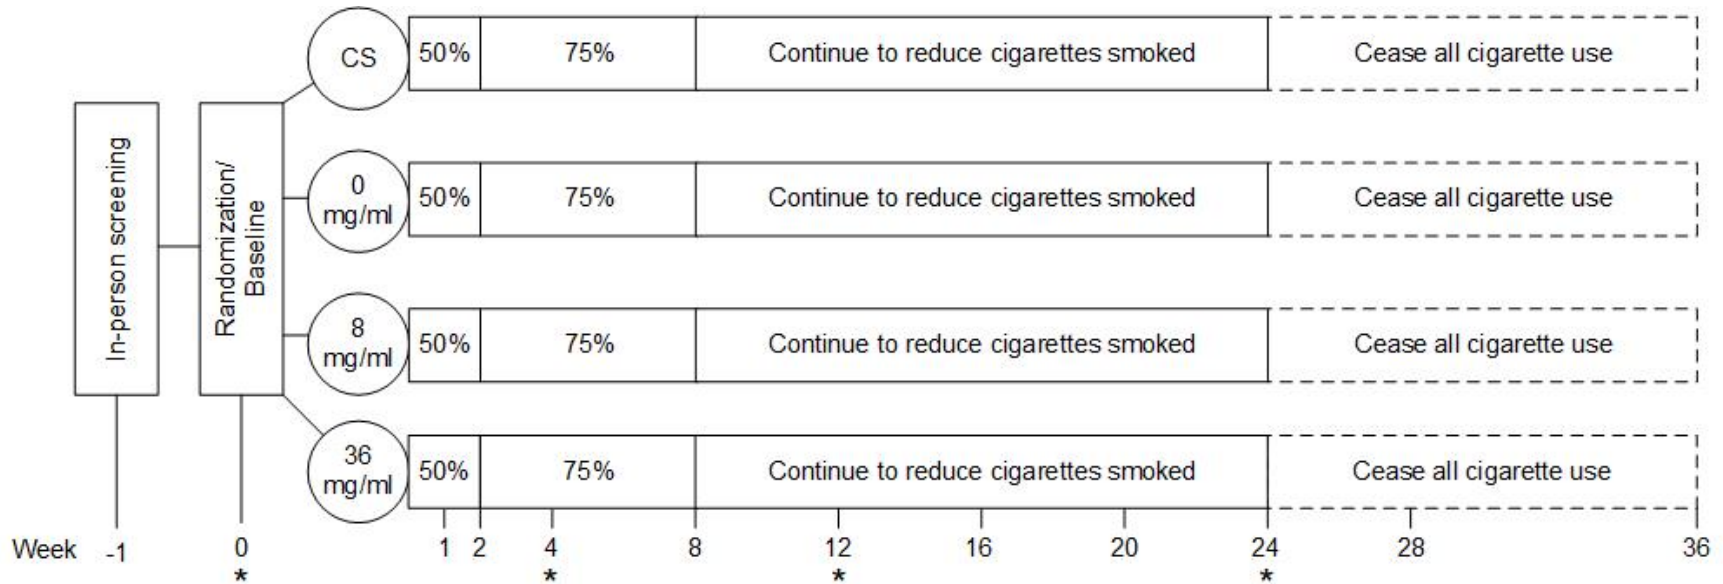

Figure S1: Study design schematic by week and condition with in-person clinic visits indicated. Cigarette smoking instructions that were active during a given week are indicated: 50% reduction (week 0-2), 75% reduction (week 3-8), continue to reduce cigarettes smoked (weeks 9-24; i.e., until the end of the intervention period), and advised to cease all cigarette use (week 25-36; follow-up period). Asterisks (\*) indicate that urine, blood, and exhaled breath condensate samples were collected at that visit. The dotted line indicates the follow-up period during which participants were provided the alternate study product to which they were randomised at the week 24 visit.

Figure S2: Adjusted urinary total NNAL using multiple imputation

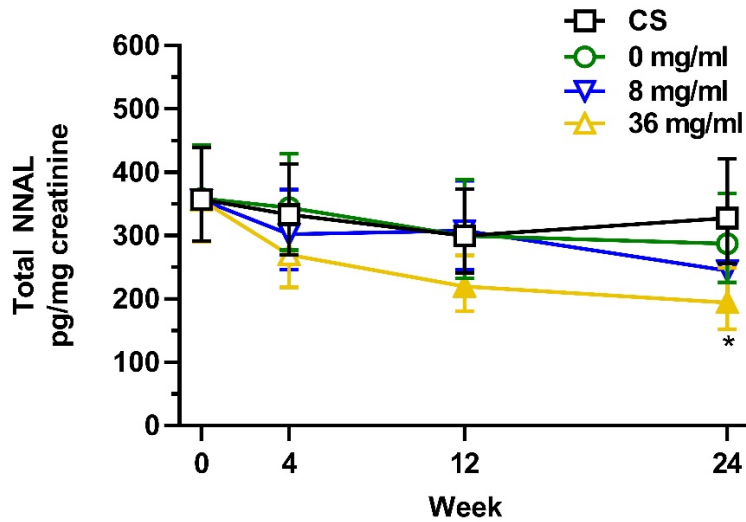

Figure S2: Urinary total 4-(methylnitrosamino)-1-(3-pyridyl)-1-butanol (NNAL) adjusted for creatinine. Estimates with 95% confidence intervals were obtained via back-transformation to the original scale following Box-Cox transformation and multiple imputation. The adjusted model included the following covariates: site, gender, age, race/ethnicity, week 0 cigarettes smoked per day, week 0 forced expiratory volume in one second, and week 0 urinary total NNAL (pg/mg creatinine-transformed). Filled symbols indicate a significant difference relative to week 0 within that condition (Bonferroni correction  $\alpha=0.017$ ). Asterisks (\*) indicate a significant difference relative to the cigarette substitute (CS) for that condition at that time point (Bonferroni correction  $\alpha=0.008$ , between all conditions).

Figure S3: Unadjusted and adjusted urinary total NNAL sensitivity analyses: Intent-to-treat and per-protocol

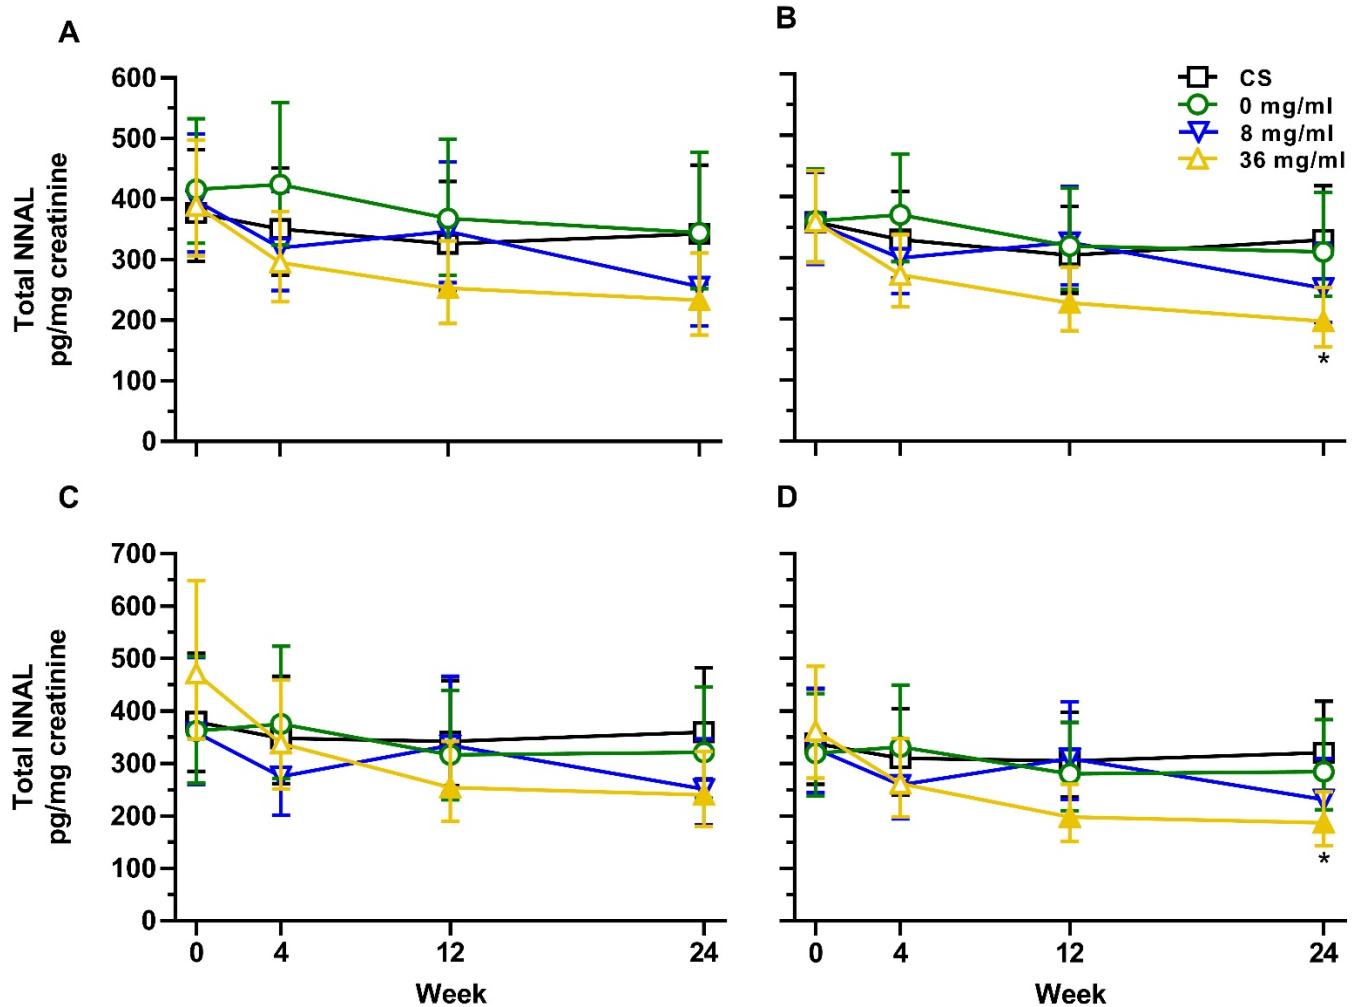

Figure S3: Urinary total 4-(methylnitrosamino)-1-(3-pyridyl)-1-butanol (NNAL) adjusted for creatinine. Estimates with 95% confidence intervals were obtained via back-transformation to the original scale following Box-Cox transformation. Panels A (unadjusted) and B (adjusted) represent intent-to-treat data (all available with no imputation). Panels C (unadjusted) and D (adjusted) represent per-protocol (individuals who attended and provided data at week 0, 4, 12, and 24). Adjusted models included the following covariates: site, gender, age, race/ethnicity, week 0 cigarettes smoked per day, week 0 forced expiratory volume in one second, and week 0 urinary total NNAL (pg/mg creatinine-transformed). Filled symbols indicate a significant difference relative to week 0 within that condition (Bonferroni correction alpha=0.017). Asterisks (\*) indicate a significant difference relative to the cigarette substitute (CS) for that condition at that time point (Bonferroni correction alpha=0.008, between all conditions).



Figure S4. Unadjusted and adjusted urinary total NNAL sensitivity analyses: baseline-carried-forward and last-observation-carried-forward

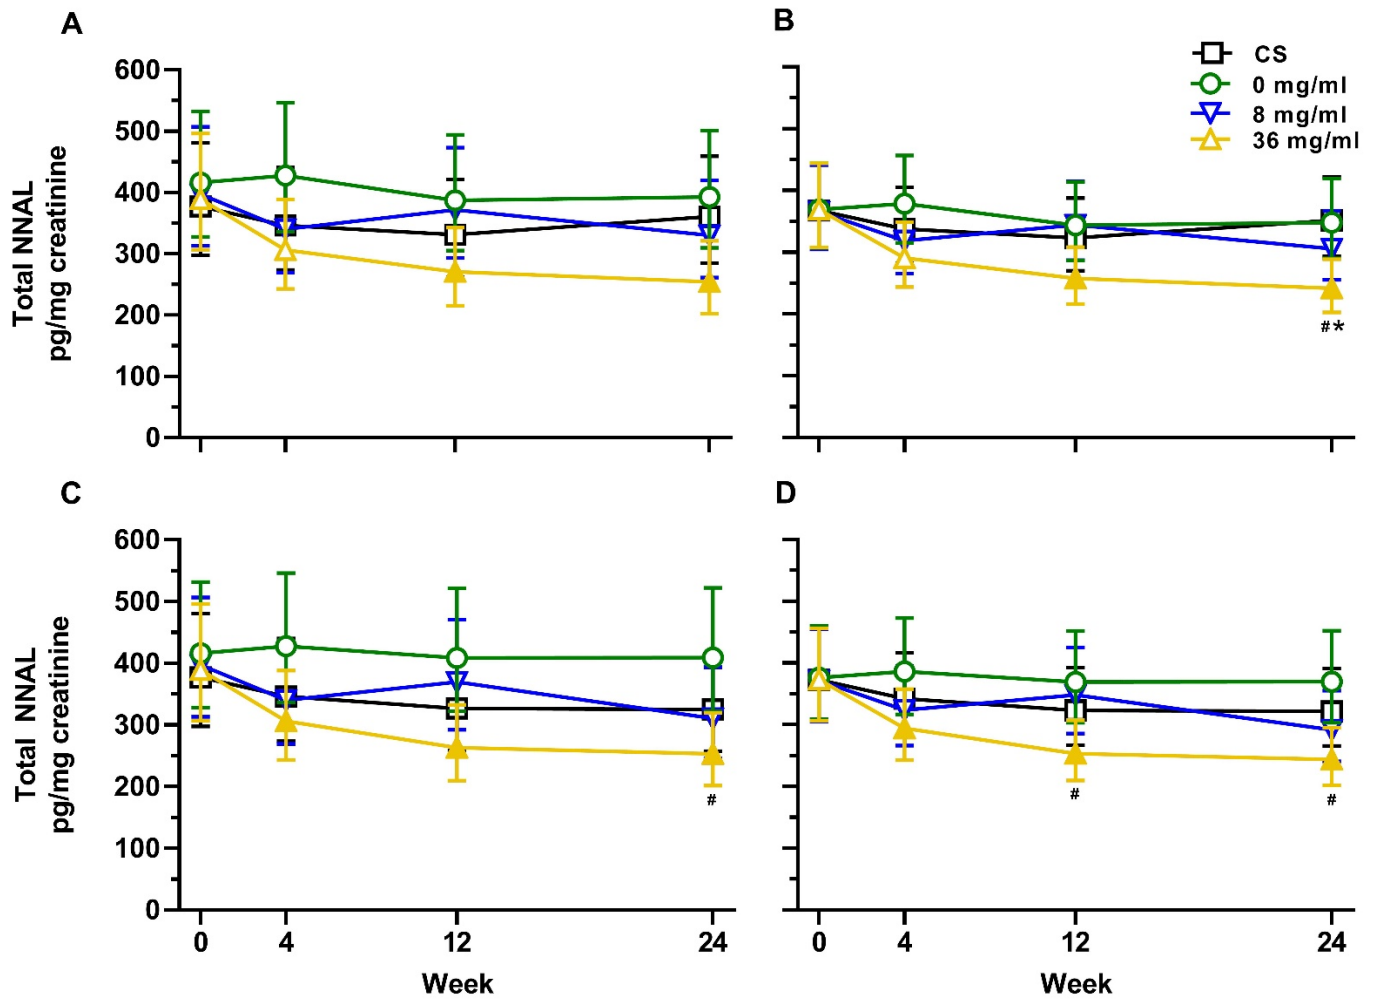

Figure S4: Urinary total 4-(methylnitrosamino)-1-(3-pyridyl)-1-butanol (NNAL) adjusted for creatinine. Estimates with 95% confidence intervals were obtained via back-transformation to the original scale following Box-Cox transformation. Panels A (unadjusted) and B (adjusted) represent baseline-carried-forward data (missing data replaced with week 0 data). Panels C (unadjusted) and D (adjusted) represent last-observation-carried-forward data (missing data replaced with last observation available for that participant). Adjusted models included the following covariates: site, gender, age, race/ethnicity, week 0 cigarettes smoked per day, week 0 forced expiratory volume in one second, and week 0 urinary total NNAL (pg/mg creatinine-transformed). Filled symbols indicate a significant difference relative to week 0 within that condition (Bonferroni correction alpha=0.017). Asterisks (\*) indicate a significant difference relative to the cigarette substitute (CS) for that condition at that time point (Bonferroni correction alpha=0.008, between all conditions). Number signs (#) indicate a significant difference relative to the 0 mg/ml condition for that condition at that time point (Bonferroni correction alpha=0.008, between all conditions).

Figure S5: Adjusted urinary cotinine using multiple imputation

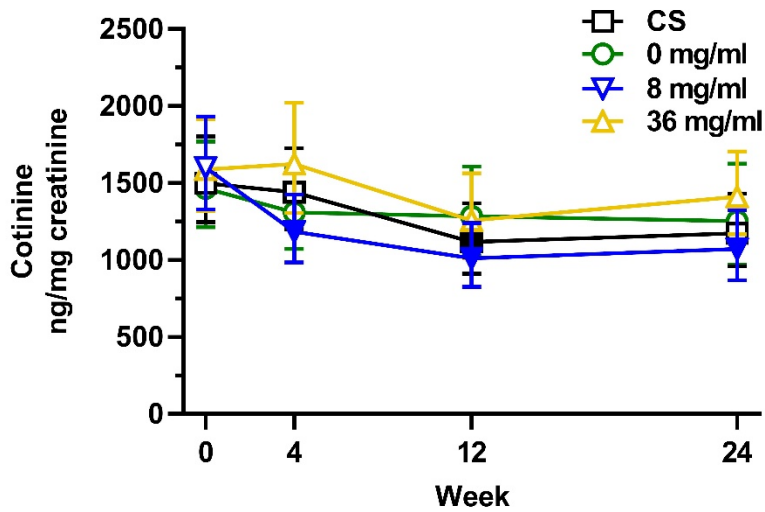

Figure S5: Urinary cotinine adjusted for creatinine. Estimates with 95% confidence intervals were obtained via back-transformation to the original scale following Box-Cox transformation and multiple imputation. The adjusted model included the following covariates: site, gender, age, race/ethnicity, week 0 urinary cotinine (ng/mg creatinine-transformed), education level, week 0 environmental smoke score, week 0 partial INTERHEART non-laboratory score, week 0 forced expiratory volume in one second, week 0 forced vital capacity, and week 0 Penn State Cigarette Dependence Index score. Filled symbols indicate a significant difference relative to week 0 within that condition (Bonferroni correction  $\alpha=0.017$ ). There were no significant differences between conditions at any time point (Bonferroni correction  $\alpha=0.008$ , between all conditions).

Figure S6: Unadjusted and adjusted urinary cotinine sensitivity analyses: Intent-to-treat and per-protocol

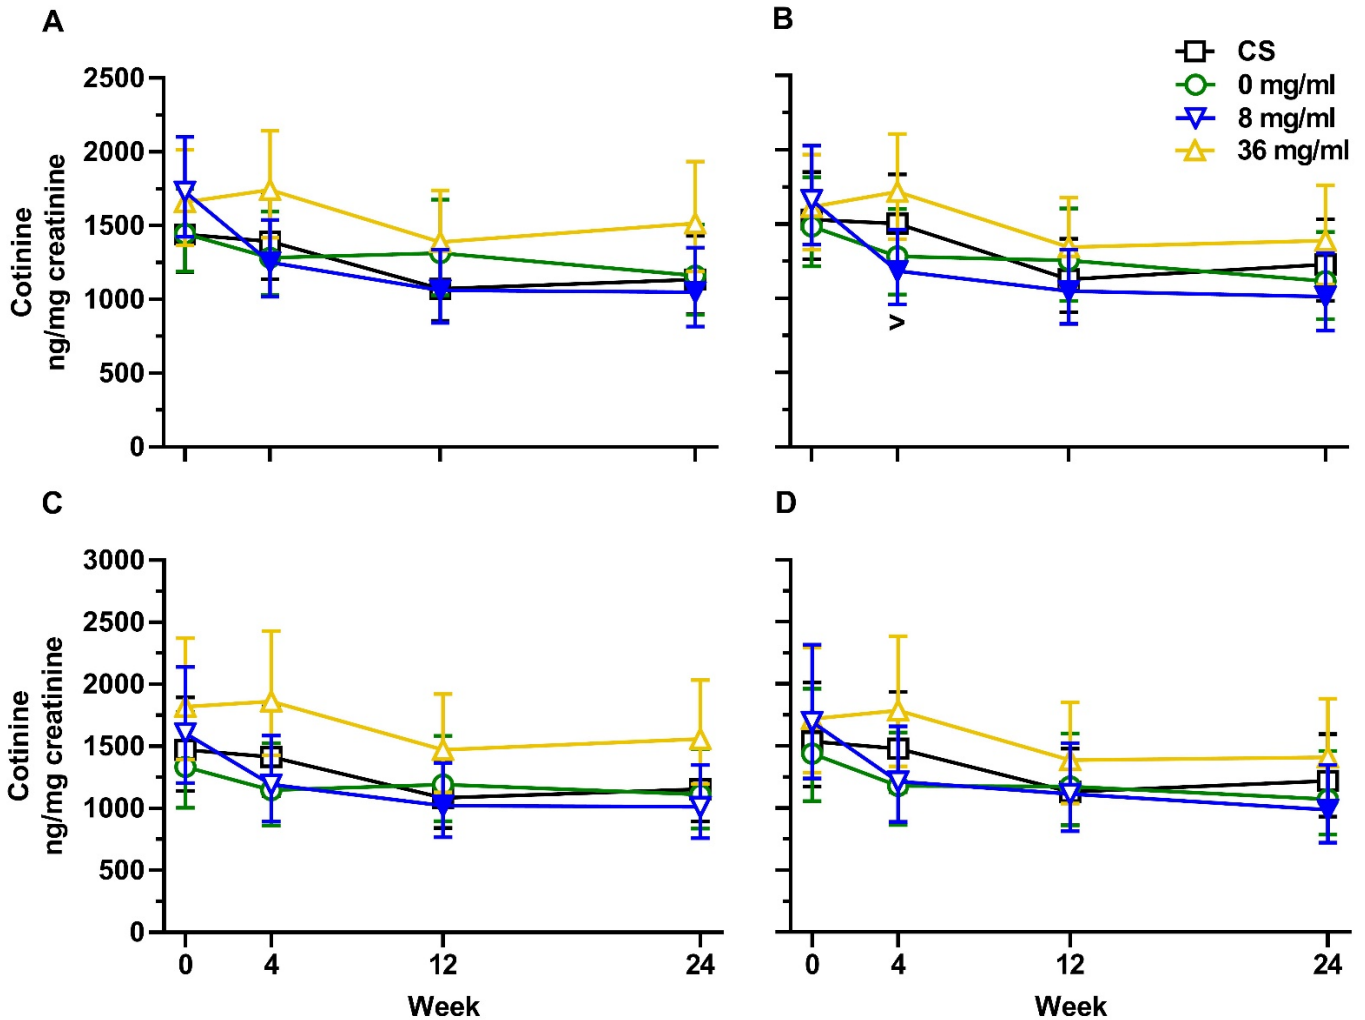

Figure S6: Urinary cotinine adjusted for creatinine. Estimates with 95% confidence intervals were obtained via back-transformation to the original scale following Box-Cox transformation. Panels A (unadjusted) and B (adjusted) represent intent-to-treat data (all available with no imputation). Panels C (unadjusted) and D (adjusted) represent per-protocol (individuals who attended and provided data at week 0, 4, 12, and 24). Adjusted models included the following covariates: site, gender, age, race/ethnicity, week 0 urinary cotinine (ng/mg creatinine-transformed), education level, week 0 environmental smoke score, week 0 partial INTERHEART non-laboratory score, week 0 forced expiratory volume in one second, week 0 forced vital capacity, and week 0 Penn State Cigarette Dependence Index score. Filled symbols indicate a significant difference relative to week 0 within that condition (Bonferroni correction alpha=0.017). Greater-than signs (>) indicate a significant difference relative to the 36 mg/ml condition for that condition at that time point (Bonferroni correction alpha=0.008, between all conditions).

**Figure S7: Unadjusted and adjusted urinary cotinine sensitivity analyses: Baseline-carried-forward and last-observation carried-forward**

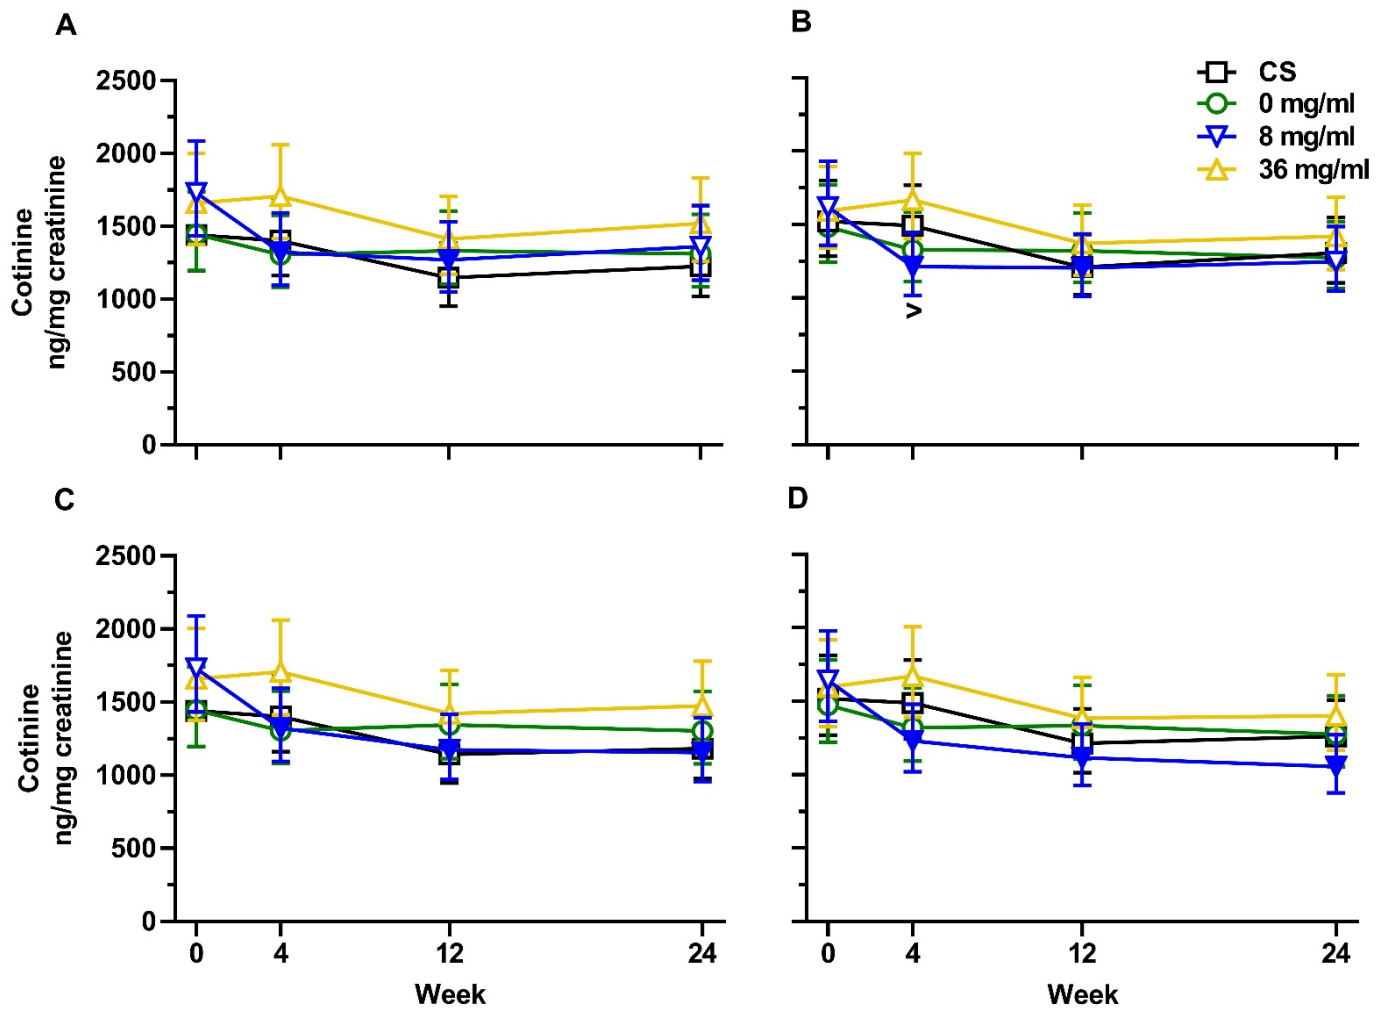

Figure S7: Urinary cotinine adjusted for creatinine. Estimates with 95% confidence intervals were obtained via back-transformation to the original scale following Box-Cox transformation. Panels A (unadjusted) and B (adjusted) represent baseline-carried-forward data (missing data replaced with week 0 data). Panels C (unadjusted) and D (adjusted) represent last-observation-carried-forward data (missing data replaced with last observation available for that participant). Adjusted models included the following covariates: site, gender, age, race/ethnicity, week 0 urinary cotinine (ng/mg creatinine-transformed), education level, week 0 environmental smoke score, week 0 partial INTERHEART non-laboratory score, week 0 forced expiratory volume in one second, week 0 forced vital capacity, and week 0 Penn State Cigarette Dependence Index score. Filled symbols indicate a significant difference relative to week 0 within that condition (Bonferroni correction alpha=0.017). Greater-than signs (>) indicate a significant difference relative to the 36 mg/ml condition for that condition at that time point (Bonferroni correction alpha=0.008, between all conditions).

Figure S8: Adjusted exhaled carbon monoxide using multiple imputation

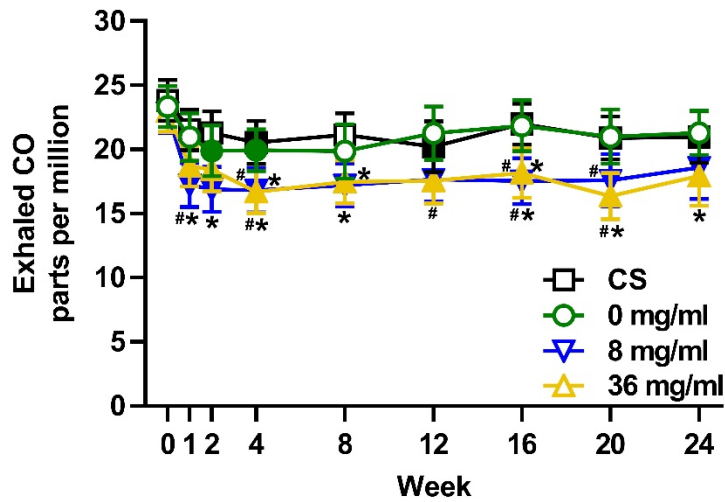

Figure S8. Exhaled carbon monoxide (CO) is presented as estimated means with 95% confidence intervals following multiple imputation. The adjusted model included the following covariates: site, gender, age, race/ethnicity, week 0 exhaled CO, week 0 cigarettes smoked per day, week 0 urinary total NNAL (pg/mg creatinine-transformed), week 0 body mass index, education level, total household income, age of smoking initiation, week 0 waist circumference, week 0 partial INTERHEART non-laboratory score, week 0 Penn State Cigarette Dependence Index score, and week 0 forced expiratory volume in one second. Filled symbols indicate a significant difference relative to week 0 within that condition (Bonferroni correction  $\alpha=0.006$ ). Asterisks (\*) indicate a significant difference relative to the cigarette substitute (CS) for that condition at that time point (Bonferroni correction  $\alpha=0.008$ , between all conditions). Number signs (#) indicate a significant difference relative to the 0 mg/ml condition for that condition at that time point (Bonferroni correction  $\alpha=0.008$ , between all conditions).

Figure S9: Unadjusted and adjusted exhaled carbon monoxide sensitivity analyses: Intent-to-treat and per-protocol

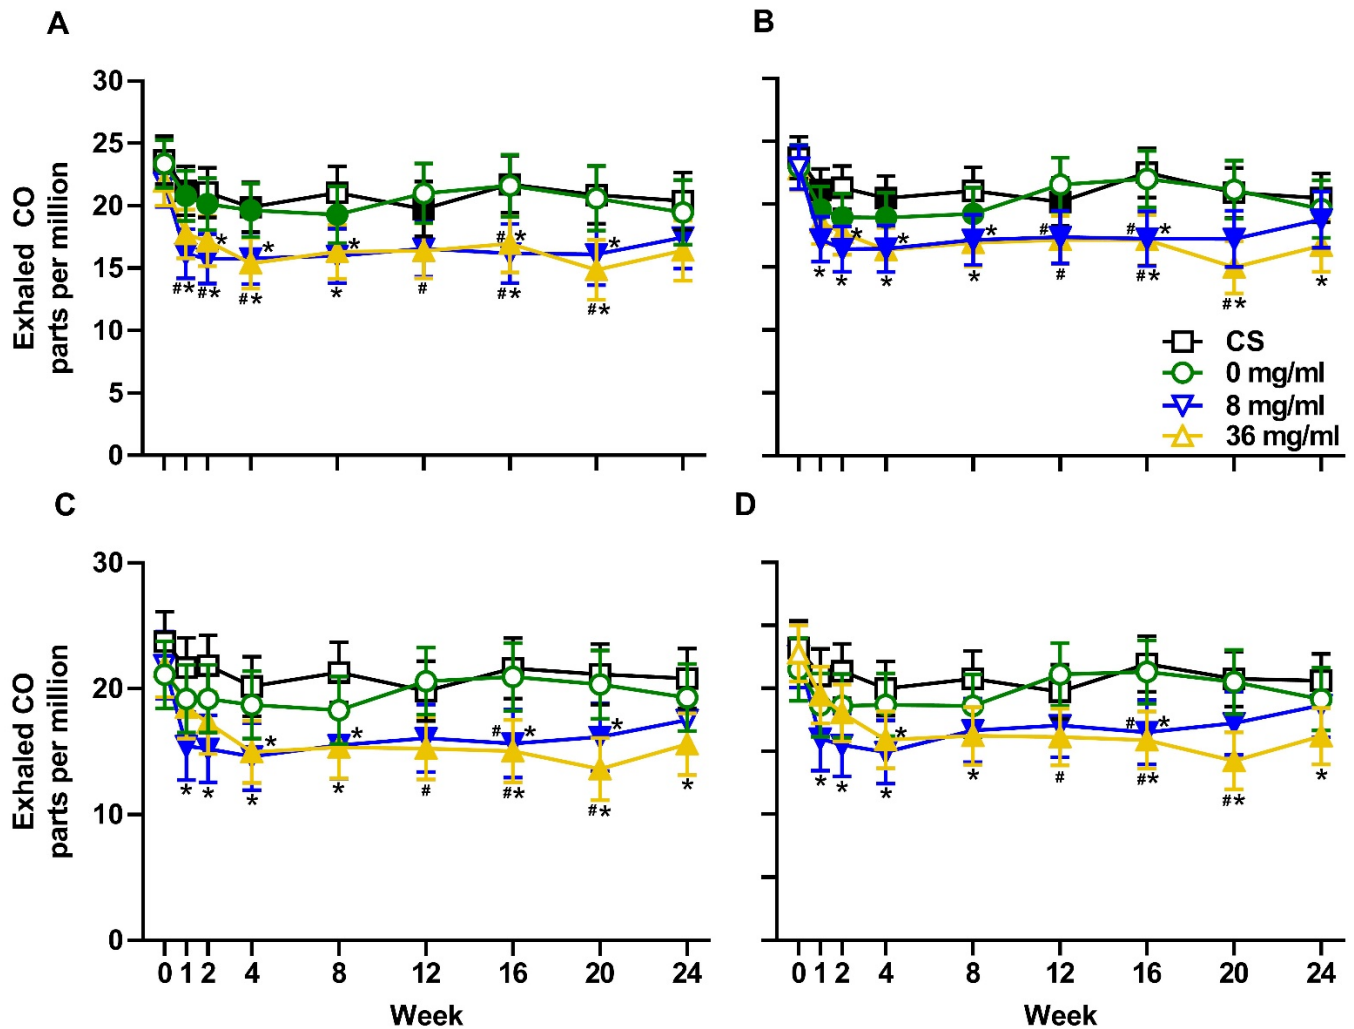

Figure S9: Exhaled carbon monoxide (CO) is presented as estimated means with 95% confidence intervals. Panels A (unadjusted) and B (adjusted) represent intent-to-treat data (all available with no imputation). Panels C (unadjusted) and D (adjusted) represent per-protocol (individuals who attended and provided data at week 0, 4, 12, and 24). Adjusted models included the following covariates: site, gender, age, race/ethnicity, week 0 exhaled CO, week 0 cigarettes smoked per day, week 0 urinary total NNAL (pg/mg creatinine-transformed), week 0 body mass index, education level, total household income, age of smoking initiation, week 0 waist circumference, week 0 partial INTERHEART non-laboratory score, week 0 Penn State Cigarette Dependence Index score, and week 0 forced expiratory volume in one second. Filled symbols indicate a significant difference relative to week 0 within that condition (Bonferroni correction  $\alpha=0.006$ ). Asterisks (\*) indicate a significant difference relative to the cigarette substitute (CS) for that condition at that time point (Bonferroni correction  $\alpha=0.008$ , between all conditions). Number signs (#) indicate a significant difference relative to the 0 mg/ml condition for that condition at that time point (Bonferroni correction  $\alpha=0.008$ , between all conditions).

**Figure S10: Unadjusted and adjusted exhaled carbon monoxide sensitivity analyses: Baseline-carried-forward and last-observation-carried-forward**

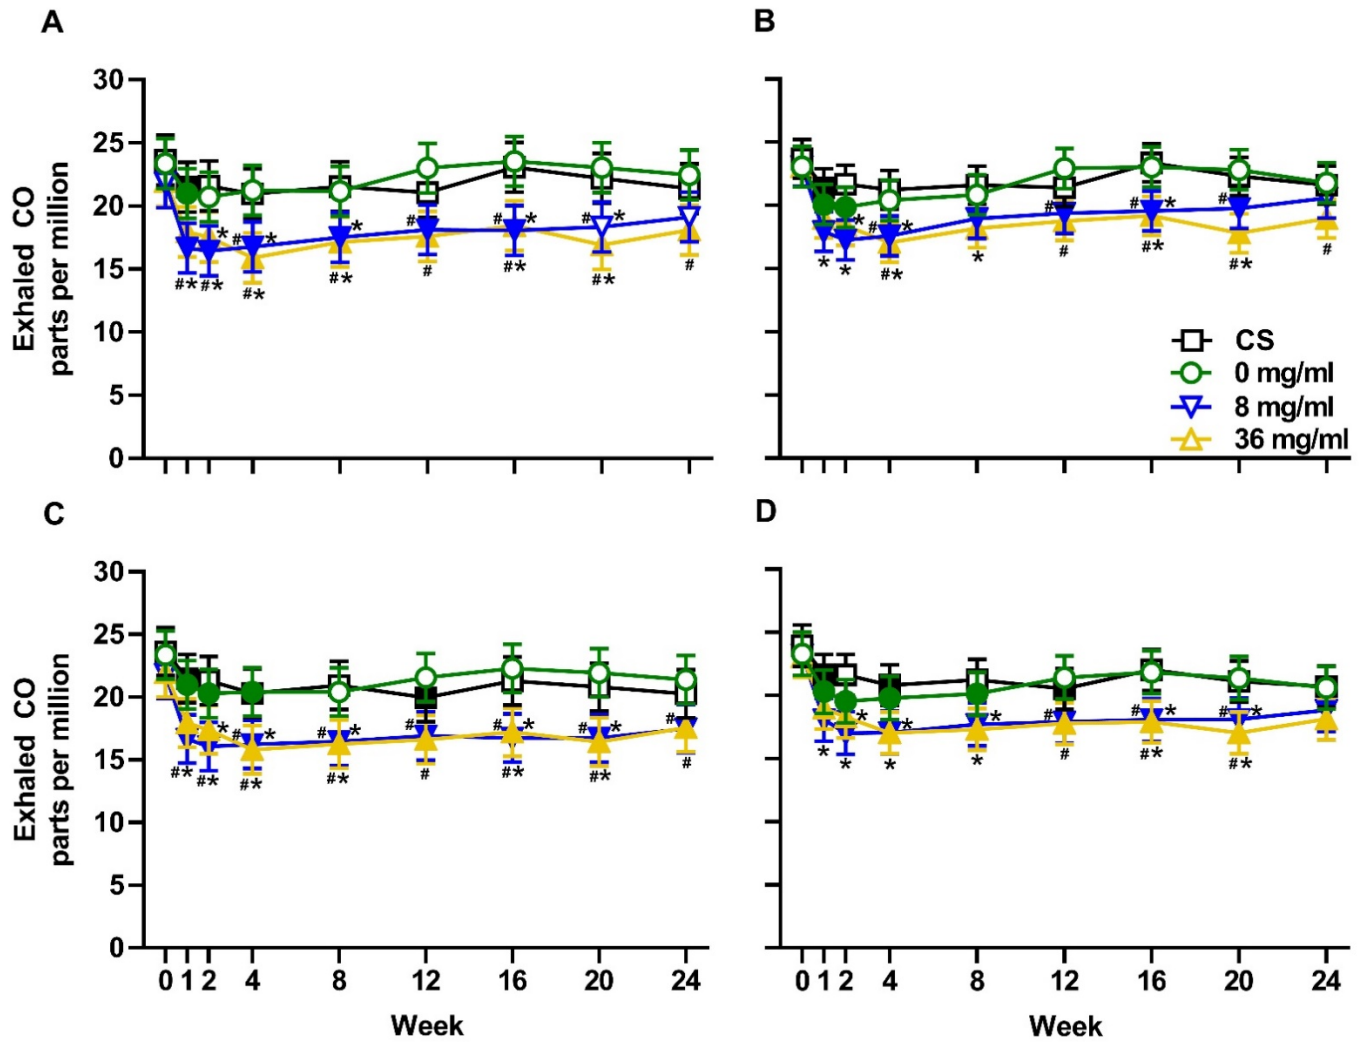

Figure S10. Exhaled carbon monoxide (CO) is presented as estimated means with 95% confidence intervals. Panels A (unadjusted) and B (adjusted) represent baseline-carried-forward data (missing data replaced with week 0 data). Panels C (unadjusted) and D (adjusted) represent last-observation-carried-forward data (missing data replaced with last observation available for that participant). Adjusted models included the following covariates: site, gender, age, race/ethnicity, week 0 exhaled CO, week 0 cigarettes smoked per day, week 0 urinary total NNAL (pg/mg creatinine-transformed), week 0 body mass index, education level, total household income, age of smoking initiation, week 0 waist circumference, week 0 partial INTERHEART non-laboratory score, week 0 Penn State Cigarette Dependence Index score, and week 0 forced expiratory volume in one second. Filled symbols indicate a significant difference relative to week 0 within that condition (Bonferroni correction alpha=0.006). Asterisks (\*) indicate a significant difference relative to the cigarette substitute (CS) for that condition at that time point (Bonferroni correction alpha=0.008, between all conditions). Number signs (#) indicate a significant difference relative to the 0 mg/ml condition for that condition at that time point (Bonferroni correction alpha=0.008, between all conditions).

Figure S11: Adjusted cigarettes smoked per day using multiple imputation

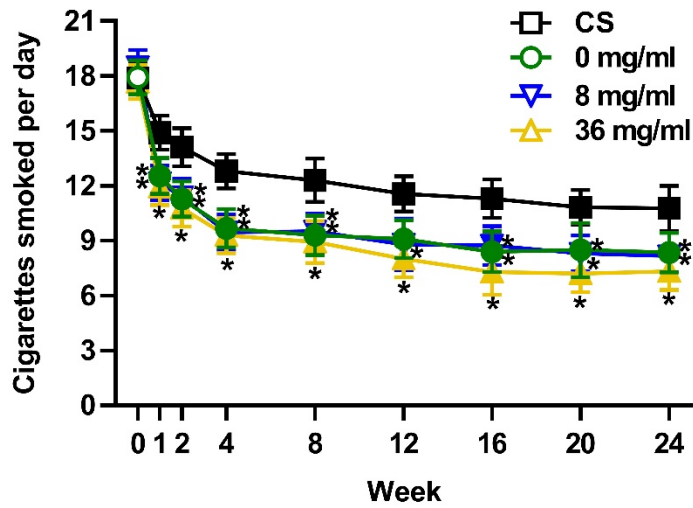

Figure S11: Cigarettes smoked per day (CPD) in the 7 days prior using a timeline-follow-back procedure is presented as estimated means with 95% confidence intervals following multiple imputation. The adjusted model included the following covariates: site, gender, age, race/ethnicity, week 0 exhaled CO, week 0 cigarettes smoked per day, education level, week 0 Kessler K6 score, week 0 Penn State Cigarette Dependence Index score, and week 0 forced expiratory volume in one second. Filled symbols indicate a significant difference relative to week 0 within that condition (Bonferroni correction  $\alpha=0.006$ ). Asterisks (\*) indicate a significant difference relative to the cigarette substitute (CS) for that condition at that time point (Bonferroni correction  $\alpha=0.008$ , between all conditions). Number signs (#) indicate a significant difference relative to the 0 mg/ml condition for that condition at that time point (Bonferroni correction  $\alpha=0.008$ , between all conditions).



Figure S12: Unadjusted and adjusted cigarettes per day sensitivity analyses: Intent-to-treat and per-protocol

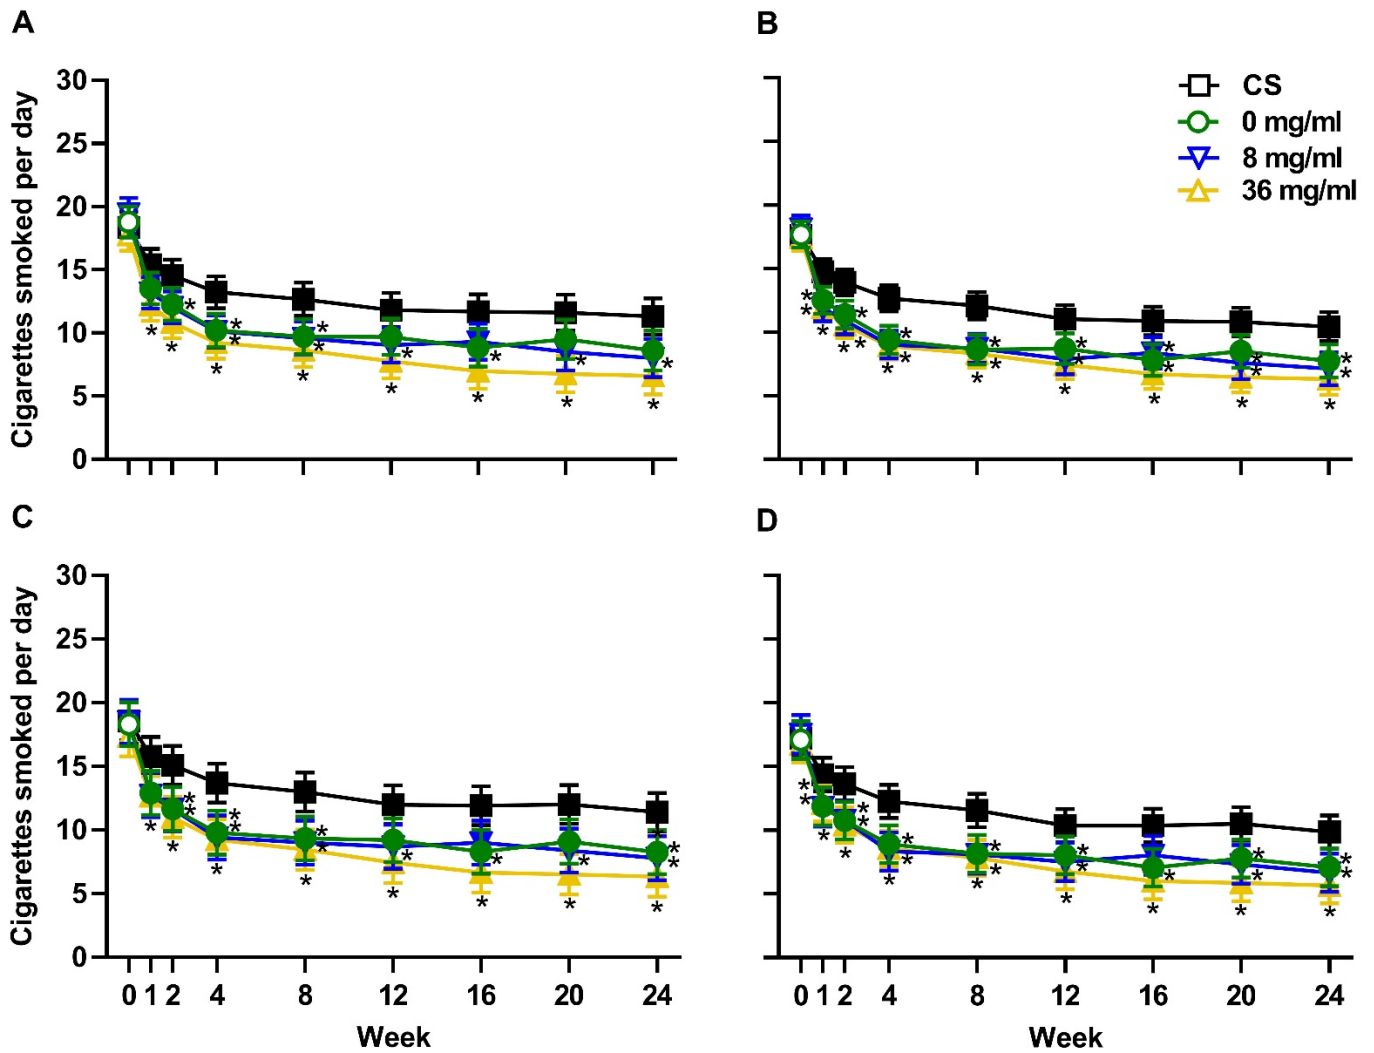

Figure S12: Cigarettes smoked per day (CPD) in the 7 days prior using a timeline-follow-back procedure is presented as estimated means with 95% confidence intervals. Panels A (unadjusted) and B (adjusted) represent intent-to-treat data (all available with no imputation). Panels C (unadjusted) and D (adjusted) represent per-protocol (individuals who attended and provided data at week 0, 4, 12, and 24). Adjusted model included the following covariates: site, gender, age, race/ethnicity, week 0 exhaled CO, week 0 cigarettes smoked per day, education level, week 0 Kessler K6 score, week 0 Penn State Cigarette Dependence Index score, and week 0 forced expiratory volume in one second. Filled symbols indicate a significant difference relative to week 0 within that condition (Bonferroni correction alpha=0.006). Asterisks (\*) indicate a significant difference relative to the cigarette substitute (CS) for that condition at that time point (Bonferroni correction alpha=0.008, between all conditions). Number signs (#) indicate a significant difference relative to the 0 mg/ml condition for that condition at that time point (Bonferroni correction alpha=0.008, between all conditions).

Figure S13: Unadjusted and adjusted cigarettes per day sensitivity analyses: Baseline-carried-forward and last-observation carried-forward

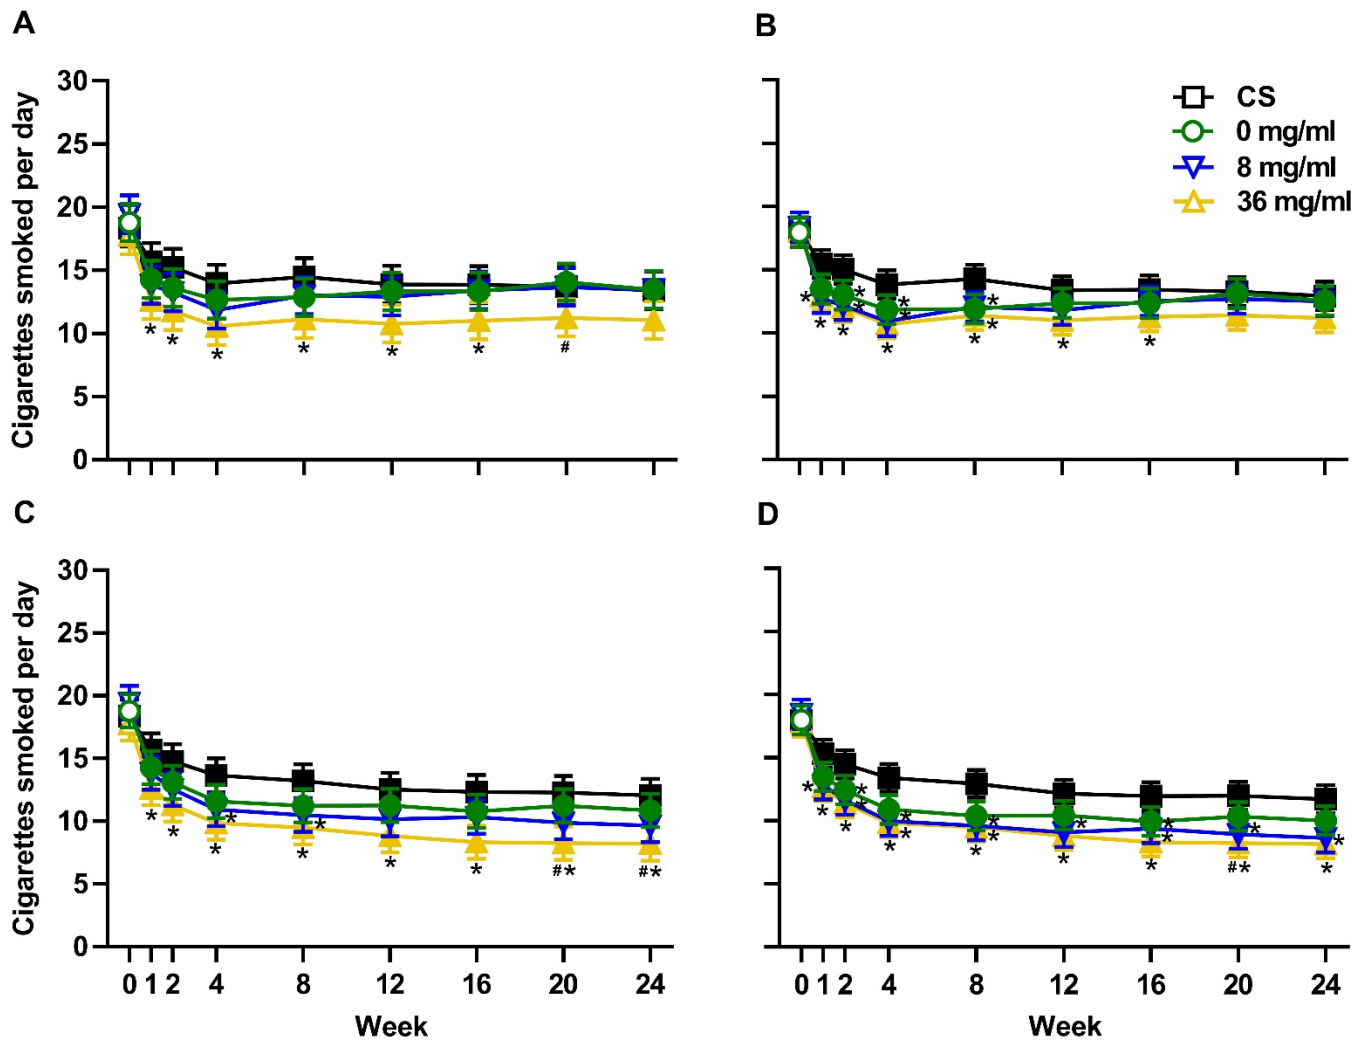

Figure S13. Cigarettes smoked per day (CPD) in the 7 days prior using a timeline-follow-back procedure is presented as estimated means with 95% confidence intervals. Panels A (unadjusted) and B (adjusted) represent baseline-carried-forward data (missing data replaced with week 0 data). Panels C (unadjusted) and D (adjusted) represent last-observation-carried-forward data (missing data replaced with last observation available for that participant). Adjusted model included the following covariates: site, gender, age, race/ethnicity, week 0 exhaled CO, week 0 cigarettes smoked per day, education level, week 0 Kessler K6 score, week 0 Penn State Cigarette Dependence Index score, and week 0 forced expiratory volume in one second. Filled symbols indicate a significant difference relative to week 0 within that condition (Bonferroni correction alpha=0.006). Asterisks (\*) indicate a significant difference relative to the cigarette substitute (CS) for that condition at that time point (Bonferroni correction alpha=0.008, between all conditions). Number signs (#) indicate a significant difference relative to the 0 mg/ml condition for that condition at that time point (Bonferroni correction alpha=0.008, between all conditions).

Figure S14. Unadjusted study product use: intent-to-treat (missing assumed no use), intent-to-treat (only available data), per-protocol

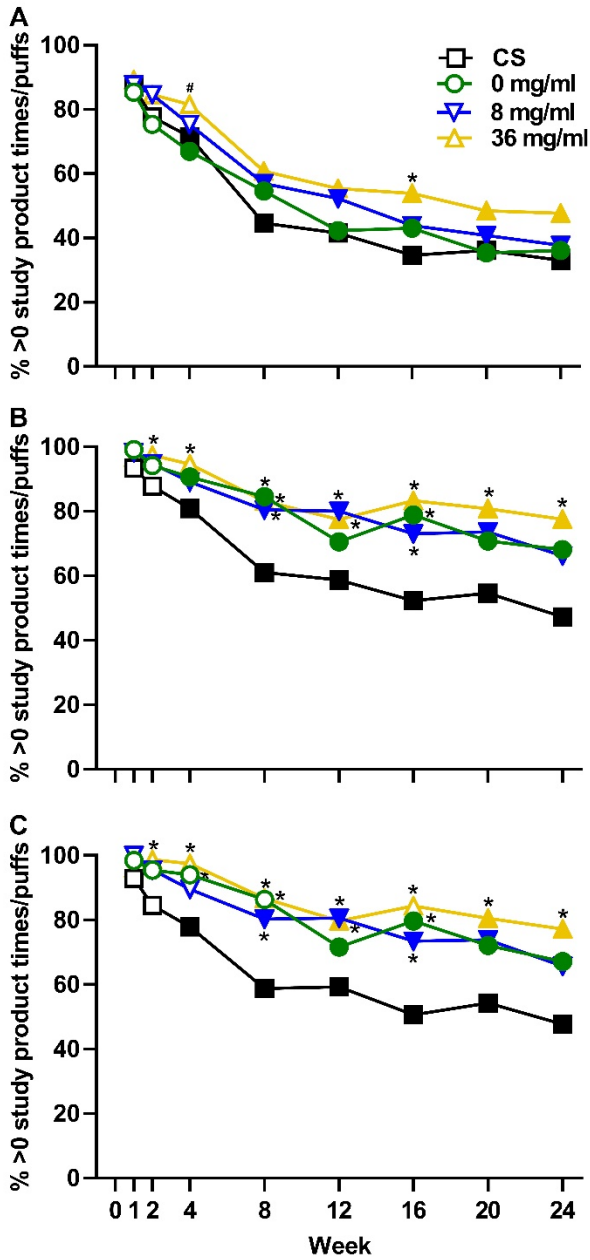

Figure S14: Study product use in the 7 days prior using a timeline-follow-back procedure is presented as percent (%) with more than 0 times/puffs reported. Panels A (intent-to-treat [ITT]; all available and missing assumed = 0 times/uses), B (ITT; all available with no imputation), and C (per-protocol; individuals who attended and provided data at week 0, 4, 12, and 24) have no adjustments for baseline covariates. Filled symbols indicate a significant difference relative to week 0 within that condition (Bonferroni correction  $\alpha=0.007$ ). Asterisks (\*) indicate a significant difference relative to the cigarette substitute (CS) for that condition at that time point (Bonferroni correction  $\alpha=0.008$ , between all conditions). Number signs (#) indicate a significant difference relative to the 0 mg/ml condition for that condition at that time point (Bonferroni correction  $\alpha=0.008$ , between all conditions).

**Table S1. Detailed baseline characteristics**

|                                             |     |                          | Electronic Nicotine Delivery System Conditions |                          |         |                          |         |                          |          |                          |         |  |
|---------------------------------------------|-----|--------------------------|------------------------------------------------|--------------------------|---------|--------------------------|---------|--------------------------|----------|--------------------------|---------|--|
|                                             |     |                          | Cigarette substitute                           |                          | 0 mg/ml |                          | 8 mg/ml |                          | 36 mg/ml |                          | Overall |  |
| Sociodemographics                           | N   | Mean±SD<br>(Min., Max.)  | N                                              | Mean±SD<br>(Min., Max.)  | N       | Mean±SD<br>(Min., Max.)  | N       | Mean±SD<br>(Min., Max.)  | N        | Mean±SD<br>(Min., Max.)  | P       |  |
| Age, year                                   | 130 | 46.1±12.4<br>(21.0,65.0) | 130                                            | 45.7±11.4<br>(21.0,64.0) | 130     | 45.6±11.7<br>(23.0,65.0) | 130     | 47.4±11.1<br>(22.0,65.0) | 520      | 46.2±11.6<br>(21.0,65.0) | 0.58    |  |
| Sex, %                                      | 130 |                          | 130                                            |                          | 130     |                          | 130     |                          | 520      |                          |         |  |
| Male                                        | 51  | 39.2                     | 50                                             | 38.5                     | 50      | 38.5                     | 63      | 48.5                     | 214      | 41.2                     | 0.28    |  |
| Female                                      | 79  | 60.8                     | 80                                             | 61.5                     | 80      | 61.5                     | 67      | 51.5                     | 306      | 58.8                     |         |  |
| Race/Ethnicity, %                           | 130 |                          | 130                                            |                          | 130     |                          | 130     |                          | 520      |                          | 0.94    |  |
| Caucasian/White NH                          | 83  | 63.9                     | 92                                             | 70.8                     | 87      | 66.9                     | 88      | 67.7                     | 350      | 67.3                     |         |  |
| African American/Black NH                   | 39  | 30.0                     | 33                                             | 25.4                     | 37      | 28.5                     | 36      | 27.7                     | 145      | 27.9                     |         |  |
| Other                                       | 8   | 6.2                      | 5                                              | 3.9                      | 6       | 4.6                      | 6       | 4.6                      | 25       | 4.8                      |         |  |
| Hispanic, %                                 | 130 |                          | 130                                            |                          | 130     |                          | 130     |                          | 130      |                          | 0.19    |  |
| Yes                                         | 1   | 0.8                      | 0                                              | 0.0                      | 3       | 2.3                      | 4       | 3.1                      | 8        | 1.5                      |         |  |
| Education, %                                | 130 |                          | 130                                            |                          | 130     |                          | 130     |                          | 520      |                          | 0.72    |  |
| Less than 12 <sup>th</sup> grade/No diploma | 12  | 9.2                      | 19                                             | 14.6                     | 13      | 10.0                     | 12      | 9.2                      | 56       | 10.8                     |         |  |
| High school graduate/GED                    | 42  | 32.3                     | 39                                             | 30.0                     | 34      | 26.2                     | 39      | 30.0                     | 154      | 29.6                     |         |  |
| Some college/No degree                      | 38  | 29.2                     | 44                                             | 33.9                     | 47      | 36.2                     | 41      | 31.5                     | 170      | 32.7                     |         |  |
| Associate's degree                          | 20  | 15.4                     | 17                                             | 13.1                     | 15      | 11.5                     | 17      | 13.1                     | 69       | 13.3                     |         |  |
| Bachelor's degree or higher                 | 18  | 13.9                     | 11                                             | 8.5                      | 21      | 16.2                     | 21      | 16.2                     | 71       | 13.7                     |         |  |
| Employment status, %                        | 130 |                          | 129                                            |                          | 129     |                          | 130     |                          | 518      |                          | 0.34    |  |
| Full-time                                   | 54  | 41.5                     | 50                                             | 38.8                     | 66      | 51.2                     | 57      | 43.9                     | 227      | 43.8                     |         |  |
| Part-time                                   | 18  | 13.9                     | 18                                             | 14.0                     | 26      | 20.2                     | 18      | 13.9                     | 80       | 15.4                     |         |  |
| Retired                                     | 10  | 7.7                      | 11                                             | 8.5                      | 8       | 6.2                      | 11      | 8.5                      | 40       | 7.7                      |         |  |
| Military                                    | 0   | 0.0                      | 0                                              | 0.0                      | 1       | 0.8                      | 0       | 0.0                      | 1        | 0.2                      |         |  |
| Student                                     | 2   | 1.5                      | 1                                              | 0.8                      | 2       | 1.6                      | 2       | 1.5                      | 7        | 1.4                      |         |  |
| Unemployed                                  | 46  | 35.4                     | 49                                             | 38.0                     | 26      | 20.2                     | 42      | 32.3                     | 163      | 31.5                     |         |  |
| Total household income, %                   | 128 |                          | 127                                            |                          | 125     |                          | 13-     |                          | 510      |                          | 0.87    |  |
| Less than \$10,000                          | 26  | 20.3                     | 32                                             | 25.2                     | 23      | 18.4                     | 27      | 20.8                     | 108      | 21.2                     |         |  |

|                                                                      |          |                             |          |                             |          |                             |          |                             |          |                             |          |
|----------------------------------------------------------------------|----------|-----------------------------|----------|-----------------------------|----------|-----------------------------|----------|-----------------------------|----------|-----------------------------|----------|
| \$10,000-\$39,999                                                    | 51       | 39.8                        | 48       | 37.8                        | 51       | 40.8                        | 43       | 33.1                        | 193      | 37.8                        |          |
| \$40,000-\$69,999                                                    | 27       | 21.1                        | 20       | 15.8                        | 24       | 19.2                        | 30       | 23.1                        | 101      | 19.8                        |          |
| \$70,000-\$99,999                                                    | 16       | 12.5                        | 18       | 14.2                        | 14       | 11.2                        | 19       | 14.6                        | 67       | 13.1                        |          |
| \$100,000 or more                                                    | 8        | 6.3                         | 9        | 7.1                         | 13       | 10.4                        | 11       | 8.5                         | 41       | 8.0                         |          |
| <b>Marital Status, %</b>                                             | 129      |                             | 129      |                             | 130      |                             | 130      |                             | 518      |                             | 0.34     |
| <b>Married</b>                                                       | 32       | 24.8                        | 37       | 28.7                        | 44       | 33.9                        | 40       | 30.8                        | 153      | 29.5                        |          |
| <b>Widowed</b>                                                       | 10       | 7.8                         | 4        | 3.1                         | 4        | 3.1                         | 3        | 2.3                         | 21       | 4.1                         |          |
| <b>Divorced</b>                                                      | 21       | 16.3                        | 27       | 20.9                        | 20       | 15.4                        | 20       | 15.4                        | 88       | 17.0                        |          |
| <b>Separated</b>                                                     | 14       | 10.9                        | 8        | 6.2                         | 4        | 3.1                         | 9        | 6.9                         | 35       | 6.8                         |          |
| <b>Never married</b>                                                 | 28       | 21.7                        | 30       | 23.3                        | 38       | 29.2                        | 36       | 27.7                        | 132      | 25.5                        |          |
| <b>Living with a partner</b>                                         | 19       | 14.7                        | 17       | 13.2                        | 16       | 12.3                        | 20       | 15.4                        | 72       | 13.9                        |          |
| <b>Member of an unmarried couple (not living together)</b>           | 5        | 3.9                         | 6        | 4.7                         | 4        | 3.1                         | 2        | 1.5                         | 17       | 3.3                         |          |
| <b>Baseline tobacco use characteristics</b>                          | <b>N</b> | <b>Mean±SD (Min., Max.)</b> | <b>P</b> |
| <b>Cigarettes smoked per day (CPD)</b>                               |          |                             |          |                             |          |                             |          |                             |          |                             |          |
| <b>Week -1</b>                                                       | 130      | 19.9±7.8 (10.0,40.0)        | 130      | 20.5±9.3 (10.0,60.0)        | 130      | 20.2±11.2 (10.0,100.0)      | 130      | 19.5±7.1 (10.0,46.0)        | 520      | 20.0±8.9 (10.0,100.0)       | 0.85     |
| <b>Week 0</b>                                                        | 130      | 18.4±7.1 (9.3,45.0)         | 130      | 18.8±8.3 (8.7,64.1)         | 130      | 19.4±8.7 (8.1,60.7)         | 130      | 17.8±6.5 (7.9,47.3)         | 520      | 18.6±7.7 (7.9,64.1)         | 0.35     |
| <b>Years smoking this number of CPD at week -1</b>                   | 130      | 15.8±13.2 (0.02,50.0)       | 130      | 15.7±13.0 (0.08,50.0)       | 130      | 16.4±13.0 (0.08,46.0)       | 130      | 17.9±13.3 (0.17,50.0)       | 520      | 16.5±13.1 (0.02,50.0)       | 0.49     |
| <b>Age of cigarette smoking initiation at week -1</b>                | 130      | 16.6±4.1 (6.0,33.0)         | 127      | 16.5±4.9 (6.0,42.0)         | 127      | 17.7±4.8 (9.0,35.0)         | 130      | 17.0±3.5 (8.0,30.0)         | 514      | 17.0±4.4 (6.0,42.0)         | 0.12     |
| <b>PSCDI score at Week 0</b>                                         | 127      | 13.4±3.0 (5.0,19.0)         | 120      | 13.7±2.7 (6.0,20.0)         | 121      | 13.2±3.0 (7.0,19.0)         | 127      | 13.2±3.2 (7.0,20.0)         | 495      | 13.4±3.0 (5.0,20.0)         | 0.46     |
| <b>Menthol cigarette smokers, %</b>                                  | 130      |                             | 130      |                             | 130      |                             | 130      |                             | 520      |                             | 0.44     |
| <b>Yes</b>                                                           | 87       | 66.9                        | 88       | 67.7                        | 81       | 62.3                        | 77       | 59.2                        | 333      | 64.0                        |          |
| <b>Use of other tobacco product(s) in past 30 days at week -1, %</b> | 130      |                             | 130      |                             | 130      |                             | 130      |                             | 520      |                             | 0.42     |
| <b>Yes</b>                                                           | 4        | 3.1                         | 9        | 6.9                         | 10       | 7.7                         | 8        | 6.2                         | 31       | 6.0                         |          |
| <b>Baseline psychosocial/health characteristics</b>                  | <b>N</b> | <b>Mean±SD (Min., Max.)</b> | <b>P</b> |
| <b>AUDIT-C score at week -1</b>                                      | 128      | 2.0±2.0 (0.0,10.0)          | 129      | 2.3±2.4 (0.0,11.0)          | 129      | 2.7±2.5 (0.0,10.0)          | 126      | 2.3±2.4 (0.0,10.0)          | 512      | 2.3±2.4 (0.0,11.0)          | 0.08     |

|                                                          |          |                                 |          |                                 |          |                                 |          |                                 |          |                                 |          |
|----------------------------------------------------------|----------|---------------------------------|----------|---------------------------------|----------|---------------------------------|----------|---------------------------------|----------|---------------------------------|----------|
| <b>Environmental smoke score at week 0, %</b>            | 128      |                                 | 128      |                                 | 125      |                                 | 129      |                                 | 510      |                                 | 0.60     |
| <b>Little or no exposure</b>                             | 36       | 27.7                            | 32       | 25.0                            | 26       | 20.8                            | 36       | 27.9                            | 130      | 25.5                            |          |
| <b>Moderate exposure</b>                                 | 32       | 25.0                            | 25       | 19.5                            | 33       | 26.4                            | 32       | 24.8                            | 122      | 23.9                            |          |
| <b>High exposure</b>                                     | 60       | 46.9                            | 71       | 55.5                            | 66       | 52.8                            | 61       | 47.3                            | 258      | 50.6                            |          |
| <b>Kessler K6 score at week 0</b>                        | 126      | 5.0±4.5<br>(0.0,21.0)           | 128      | 4.8±4.0<br>(0.0,17.0)           | 124      | 5.0±3.9<br>(0.0,20.0)           | 128      | 4.9±4.2<br>(0.0,17.0)           | 506      | 4.9±4.2<br>(0.0,21.0)           | 0.99     |
| <b>Perceived Stress Scale score at week 0</b>            | 126      | 19.8±4.5<br>(0.0,32.0)          | 124      | 20.0±4.3<br>(0.0,34.0)          | 125      | 19.3±3.5<br>(4.0,35.0)          | 130      | 20.3±4.0<br>(9.0,35.0)          | 505      | 19.9±4.1<br>(0.0,35.0)          | 0.23     |
| <b>CES-D score at week 0</b>                             | 115      | 13.2±10.2<br>(0.0,39.0)         | 118      | 12.5±9.6<br>(0.0,48.0)          | 120      | 11.9±9.1<br>(0.0,47.0)          | 121      | 11.8±10.3<br>(0.0,44.0)         | 474      | 12.3±9.8<br>(0.0,48.0)          | 0.67     |
| <b>Partial INTERHEART non-laboratory score at week 0</b> | 125      | 10.0±3.3<br>(1.0,18.0)          | 124      | 9.6±3.5<br>(0.0,20.0)           | 122      | 10.2±3.2<br>(2.0,17.0)          | 123      | 10.1±3.5<br>(3.0,18.0)          | 494      | 10.0±3.4<br>(0.0,20.0)          | 0.48     |
| <b>Clinical COPD Questionnaire score at week 0</b>       | 127      | 1.2±0.9<br>(0.0,5.0)            | 123      | 1.2±0.8<br>(0.0,3.7)            | 128      | 1.2±0.8<br>(0.0,3.4)            | 128      | 1.3±1.0<br>(0.0,5.3)            | 506      | 1.2±0.9<br>(0.0,5.3)            | 0.74     |
| <b>Baseline physiological measures<sup>^</sup></b>       | <b>N</b> | <b>Mean±SD<br/>(Min., Max.)</b> | <b>P</b> |
| <b>Urinary total NNAL, pg/mg creatinine</b>              |          |                                 |          |                                 |          |                                 |          |                                 |          |                                 |          |
| <b>Median (IQR)</b>                                      | 130      | 441.4 (683.2)                   | 130      | 499.8 (612.2)                   | 130      | 420.0 (835.6)                   | 130      | 544.4 (825.3)                   | 520      | 473.2 (710.6)                   | 0.79*    |
| <b>Geometric mean (95% CI)</b>                           | 130      | 404.2<br>(330.5, 494.4)         | 130      | 440.7<br>(366.4, 530.0)         | 130      | 425.0<br>(347.3, 520.1)         | 130      | 432.7<br>(339.3, 551.8)         | 520      | 425.4<br>(383.6, 471.8)         |          |
| <b>Urinary cotinine, ng/mg creatinine</b>                |          |                                 |          |                                 |          |                                 |          |                                 |          |                                 |          |
| <b>Median (IQR)</b>                                      | 130      | 1641.2 (2018.3)                 | 130      | 1593.2 (1564.1)                 | 130      | 1734.0 (2057.5)                 | 130      | 1871.5 (2137.7)                 | 520      | 1662.5<br>(1908.6)              | 0.24*    |
| <b>Geometric mean (95% CI)</b>                           | 130      | 1441.6<br>(1227.9, 1692.4)      | 130      | 1444.5<br>(1241.5, 1680.8)      | 130      | 1729.5<br>(1494.0, 2002.2)      | 130      | 1658.7<br>(1411.2, 1949.7)      | 520      | 1563.4<br>(1447.4, 1688.7)      |          |
| <b>Waist circumference, cm</b>                           | 130      | 103.3±18.7<br>(68.6, 172.7)     | 129      | 102.4±20.0<br>(63.5, 154.9)     | 129      | 102.2±17.2<br>(68.6, 144.8)     | 130      | 103.5±16.8<br>(66.0, 151.1)     | 518      | 102.8±18.2<br>(63.5, 172.7)     | 0.91     |
| <b>Hip circumference, cm</b>                             | 130      | 110.6±15.3<br>(77.5, 154.9)     | 129      | 109.4±16.6<br>(78.7, 160.0)     | 129      | 109.2±14.1<br>(71.1, 148.6)     | 130      | 110.2±14.9<br>(81.3, 162.6)     | 518      | 109.9±15.2<br>(71.1, 162.6)     | 0.87     |
| <b>Height, cm</b>                                        | 130      | 170.0±9.4<br>(146.1, 193.0)     | 130      | 169.2±9.4<br>(141.0, 190.5)     | 129      | 170.4±9.0<br>(143.5, 188.0)     | 130      | 170.7±9.3<br>(152.4, 190.5)     | 519      | 170.1±9.3<br>(141.0, 193.0)     | 0.60     |

|                                       |     |                                   |     |                                 |     |                                   |     |                                  |     |                                 |      |
|---------------------------------------|-----|-----------------------------------|-----|---------------------------------|-----|-----------------------------------|-----|----------------------------------|-----|---------------------------------|------|
| <b>Weight, kg</b>                     | 130 | 87.1±22.8<br>(47.5, 164.0)        | 130 | 85.0±26.1<br>(39.3, 167.4)      | 130 | 84.8±20.0<br>(47.2, 139.1)        | 130 | 87.3±22.9<br>(43.9, 154.6)       | 520 | 86.0±23.0<br>(39.3, 167.4)      | 0.72 |
| <b>BMI, kg/m<sup>2</sup></b>          | 130 | 30.3±7.2<br>(17.5, 52.8)          | 130 | 29.7±8.1<br>(14.7, 55.8)        | 130 | 29.5±6.6<br>(16.6, 50.7)          | 130 | 30.2±7.4<br>(17.3, 53.8)         | 519 | 30.0±7.3<br>(14.7, 55.8)        | 0.80 |
| <b>FEV1, cm<sup>3</sup></b>           | 130 | 2680.2±867.8<br>(890.0, 5710.0)   | 130 | 2641.1±862.2<br>(540.0, 5020.0) | 128 | 2713.9±859.3<br>(930.0,4720.0)    | 130 | 2623.2±835.7<br>(900.0, 4760.0)  | 518 | 2664.4±854.6<br>(540.0,5710.0)  | 0.83 |
| <b>FVC, cm<sup>3</sup></b>            | 130 | 3396.5±1056.6<br>(1400.0, 6920.0) | 130 | 3397.8±989.3<br>(540.0, 6330.0) | 128 | 3443.1±1008.9<br>(1330.0, 5980.0) | 130 | 3353.3±968.8<br>(1320.0, 6190.0) | 518 | 3397.5±1004.0<br>(540.0,6920.0) | 0.92 |
| <b>CO, parts per million</b>          | 130 | 23.6±12.5<br>(5.0,92.0)           | 130 | 23.4±12.2<br>(4.0,74.0)         | 130 | 21.8±9.8<br>(8.0,53.0)            | 130 | 21.9±10.5<br>(2.0,68.0)          | 520 | 22.7±11.3<br>(2.0,92.0)         | 0.44 |
| <b>Pulse, beats per minute</b>        | 130 | 81.4±13.0<br>(50.0,113.0)         | 130 | 83.0±14.1<br>(50.0,121.0)       | 130 | 80.9±12.4<br>(49.0,131.0)         | 129 | 81.9±12.8<br>(53.0,114.0)        | 519 | 81.8±13.1<br>(49.0,131.0)       | 0.58 |
| <b>Systolic blood pressure, mmHg</b>  | 130 | 125.3±14.0<br>(94.0,159.0)        | 130 | 124.3±13.8<br>(91.0,165.0)      | 130 | 124.6±14.5<br>(95.0,172.0)        | 129 | 127.1±15.5<br>(88.0,186.0)       | 519 | 125.3±14.5<br>(88.0,186.0)      | 0.43 |
| <b>Diastolic blood pressure, mmHg</b> | 130 | 78.6±9.9<br>(58.0,106.0)          | 130 | 79.6±9.7<br>(57.0,105.0)        | 130 | 78.2±10.1<br>(59.0,116.0)         | 129 | 80.3±9.8<br>(59.0,102.0)         | 519 | 79.2±9.9<br>(57.0,116.0)        | 0.32 |

Note: SD, standard deviation; Min., minimum; Max., maximum; cm, centimeter; kg, kilogram; GED, general education diploma; CPD, cigarettes per day; PSCDI, Penn State Cigarette Dependence Index; AUDIT-C, Alcohol Use Disorders Identification Test-Consumption; CES-D, Center for Epidemiologic Studies Depression Scale; COPD, Chronic Obstructive Pulmonary Disease; NNAL, 4-(methylnitrosamino)-1-(3-pyridyl)-1-butanol; BMI, body mass index; FEV1, Forced expiratory volume in one second; FVC, forced vital capacity; CO, carbon monoxide; CI, confidence interval.

^All baseline physiological measures obtained at week 0.

\* Based on Kruskal-Wallis test.

**Table S2. Detailed baseline characteristics by site**

|                                             | VCU<br>(N=200) |                           | PSU<br>(N=320) |                           |         |
|---------------------------------------------|----------------|---------------------------|----------------|---------------------------|---------|
| Sociodemographics                           | N              | Mean±SD<br>(Min., Max.)   | N              | Mean±SD<br>(Min., Max.)   | P       |
| Age, year                                   | 200            | 46·8±12·3<br>(21·0, 65·0) | 320            | 45·9±11·2<br>(21·0, 65·0) | 0·36    |
| Sex, %                                      | 200            |                           | 320            |                           | 0·0006  |
| Male                                        | 101            | 50·5                      | 113            | 35·3                      |         |
| Female                                      | 99             | 49·5                      | 207            | 64·7                      |         |
| Race/Ethnicity, %                           | 200            |                           | 320            |                           | <0·0001 |
| Caucasian/White NH                          | 65             | 32·5                      | 285            | 89·1                      |         |
| African American/Black NH                   | 126            | 63·0                      | 19             | 5·9                       |         |
| Other                                       | 9              | 4·5                       | 16             | 5·0                       |         |
| Hispanic, %                                 | 200            |                           | 320            |                           | 0·03    |
| Yes                                         | 0              | 0·0                       | 8              | 2·5                       |         |
| Education, %                                | 200            |                           | 320            |                           | 0·10    |
| Less than 12 <sup>th</sup> grade/No diploma | 30             | 15·0                      | 26             | 8·1                       |         |
| High school graduate/GED                    | 57             | 28·5                      | 97             | 30·3                      |         |
| Some college/No degree                      | 67             | 33·5                      | 103            | 32·2                      |         |
| Associate's degree                          | 24             | 12·0                      | 45             | 14·1                      |         |
| Bachelor's degree or higher                 | 22             | 11·0                      | 49             | 15·3                      |         |
| Employment status, %                        | 119            |                           | 319            |                           | <0·0001 |
| Full-time                                   | 62             | 31·2                      | 165            | 51·7                      |         |
| Part-time                                   | 39             | 19·6                      | 41             | 12·9                      |         |
| Retired                                     | 16             | 8·0                       | 24             | 7·5                       |         |
| Military                                    | 1              | 0·5                       | 0              | 0·0                       |         |
| Student                                     | 4              | 2·0                       | 3              | 0·9                       |         |
| Unemployed                                  | 77             | 38·7                      | 4              | 27·0                      |         |
| Total household income, %                   | 195            |                           | 315            |                           | <0·0001 |
| Less than \$10,000                          | 79             | 40·5                      | 29             | 9·2                       |         |
| \$10,000-\$39,999                           | 78             | 40·0                      | 115            | 36·5                      |         |
| \$40,000-\$69,999                           | 19             | 9·7                       | 82             | 26·0                      |         |



|                                                                      |     |                           |     |                           |         |
|----------------------------------------------------------------------|-----|---------------------------|-----|---------------------------|---------|
| \$70,000-\$99,999                                                    | 9   | 4·6                       | 58  | 18·4                      |         |
| \$100,000 or more                                                    | 10  | 5·1                       | 31  | 9·8                       |         |
| <b>Marital Status, %</b>                                             | 199 |                           | 319 |                           | <0·0001 |
| <b>Married</b>                                                       | 27  | 13·6                      | 126 | 39·5                      |         |
| <b>Widowed</b>                                                       | 11  | 5·5                       | 10  | 3·1                       |         |
| <b>Divorced</b>                                                      | 31  | 15·6                      | 57  | 17·9                      |         |
| <b>Separated</b>                                                     | 19  | 9·6                       | 16  | 5·0                       |         |
| <b>Never married</b>                                                 | 76  | 38·2                      | 56  | 17·6                      |         |
| <b>Living with a partner</b>                                         | 21  | 10·6                      | 51  | 16·0                      |         |
| <b>Member of an unmarried couple (not living together)</b>           | 14  | 7·0                       | 3   | 0·9                       |         |
| <b>Baseline tobacco use characteristics</b>                          | N   | Mean±SD<br>(Min., Max.)   | N   | Mean±SD<br>(Min., Max.)   | P       |
| <b>Cigarettes per day (CPD)</b>                                      |     |                           |     |                           |         |
| <b>Week -1</b>                                                       | 200 | 19·6±8·3<br>(10·0, 60·0)  | 320 | 20·3±9·3<br>(10·0, 100·0) | 0·41    |
| <b>Week 0</b>                                                        | 200 | 17·9±6·8<br>(7·9, 50·3)   | 320 | 19·1±8·2<br>(9·4, 64·1)   | 0·07    |
| <b>Years smoking this number of CPD at week -1</b>                   | 200 | 14·4±12·2<br>(0·17, 46·0) | 320 | 17·8±13·5<br>(0·02, 50·0) | 0·005   |
| <b>Age of cigarette smoking initiation at week -1</b>                | 196 | 17·2±4·8<br>(6·0, 42·0)   | 318 | 16·8±4·1<br>(7·0, 35·0)   | 0·35    |
| <b>PSCDI score at week 0</b>                                         | 192 | 13·6±3·2<br>(5·0, 20·0)   | 303 | 13·3±2·8<br>(7·0, 20·0)   | 0·36    |
| <b>Menthol cigarette smokers, %</b>                                  | 200 |                           | 320 |                           | <0·0001 |
| <b>Yes</b>                                                           | 155 | 77·5                      | 178 | 55·6                      |         |
| <b>Use of other tobacco product(s) in past 30 days at week -1, %</b> | 200 |                           | 320 |                           |         |
| <b>Yes</b>                                                           | 24  | 12·0                      | 7   | 2·2                       | <0·0001 |
| <b>Baseline psychosocial//health characteristics</b>                 | N   | Mean±SD<br>(Min., Max.)   | N   | Mean±SD<br>(Min., Max.)   | P       |
| <b>AUDIT-C score at week -1</b>                                      | 197 | 2·2±2·4<br>(0·0, 10·0)    | 315 | 2·4±2·3<br>(0·0, 11·0)    | 0·35    |
| <b>Environmental smoke score at week 0, %</b>                        | 200 |                           | 310 |                           | 0·001   |
| <b>High exposure</b>                                                 | 37  | 18·5                      | 93  | 30·0                      |         |
| <b>Moderate exposure</b>                                             | 42  | 21·0                      | 80  | 25·8                      |         |
| <b>Little or no exposure</b>                                         | 121 | 60·5                      | 137 | 44·2                      |         |

|                                                          |     |                                   |     |                                    |         |
|----------------------------------------------------------|-----|-----------------------------------|-----|------------------------------------|---------|
| <b>Kessler K6 score at week 0</b>                        | 194 | 4·6±3·9<br>(0·0, 16·0)            | 312 | 5·1±4·3<br>(0·0, 21·0)             | 0·26    |
| <b>Perceived Stress Scale score at week 0</b>            | 192 | 19·8±4·3<br>(0·0, 35·0)           | 313 | 19·9±4·0<br>(0·0, 35·0)            | 0·88    |
| <b>CES-D Score at week 0</b>                             | 181 | 12·2±8·9<br>(0·0, 39·0)           | 293 | 12·4±10·3<br>(0·0, 48·0)           | 0·84    |
| <b>Partial INTERHEART non-laboratory score at week 0</b> | 187 | 9·8±3·4<br>(0·0, 18·0)            | 307 | 10·0±3·3<br>(2·0, 20·0)            | 0·49    |
| <b>Clinical COPD Questionnaire score at week 0</b>       | 194 | 1·2±0·9<br>(0·0, 5·3)             | 312 | 1·2±0·9<br>(0·0, 5·0)              | 0·38    |
| <b>Baseline physiological measures<sup>^</sup></b>       | N   | Mean±SD<br>(Min., Max.)           | N   | Mean±SD<br>(Min., Max.)            | P       |
| <b>Urine total NNAL, pg/mg creatinine</b>                |     |                                   |     |                                    |         |
| <b>Median (IQR)<br/>(Min., Max.)</b>                     | 200 | 396·5 (554·7)<br>(0·9, 10680·6)   | 320 | 609·6 (863·8)<br>(0·4, 10985·0)    | 0·0002* |
| <b>Geometric mean (95% CI)</b>                           | 200 | 346·2<br>(296·0, 404·9)           | 320 | 483·9<br>(422·7, 554·1)            | ..      |
| <b>Urine cotinine, ng/mg creatinine</b>                  |     |                                   |     |                                    |         |
| <b>Median (IQR)<br/>(Min., Max.)</b>                     | 200 | 1610·7 (1513·0)<br>(69·7, 8489·9) | 320 | 1732·3 (2163·0)<br>(56·1, 11980·8) | 0·19*   |
| <b>Geometric mean (95% CI)</b>                           | 200 | 1485·5<br>(1328·9, 1660·5)        | 320 | 1614·1<br>(1454·0, 1791·9)         | ..      |
| <b>Waist circumference, cm</b>                           | 200 | 101·1±17·7<br>(64·8, 154·9)       | 318 | 103·9±18·4<br>(63·5, 172·7)        | 0·08    |
| <b>Hip circumference, cm</b>                             | 200 | 106·4±15·5<br>(71·1, 151·1)       | 318 | 112·0±14·6<br>(81·3, 162·6)        | <0·0001 |
| <b>Height, cm</b>                                        | 200 | 172·0±9·3<br>(144·8, 193·0)       | 319 | 168·9±9·0<br>(141·0, 190·5)        | 0·0002  |
| <b>Weight, kg</b>                                        | 200 | 86·9±23·3<br>(45·3, 167·4)        | 320 | 85·5±22·8<br>(39·3, 151·7)         | 0·50    |
| <b>BMI, kg/m<sup>2</sup></b>                             | 200 | 29·6±7·4<br>(18·2, 53·8)          | 319 | 30·2±7·3<br>(14·7, 55·8)           | 0·39    |
| <b>FEV1, cm<sup>3</sup></b>                              | 199 | 2617·4±939·5<br>(540·0, 5710·0)   | 319 | 2693·7±797·2<br>(890·0, 4910·0)    | 0·34    |
| <b>FVC, cm<sup>3</sup></b>                               | 199 | 3344·1±1131·5<br>(540·0, 6920·0)  | 319 | 3430·8±915·8<br>(1390·0, 6530·0)   | 0·36    |

|                                       |     |                             |     |                             |      |
|---------------------------------------|-----|-----------------------------|-----|-----------------------------|------|
| <b>Exhaled CO, parts per million</b>  | 200 | 24.5±13.4<br>(7.0, 92.0)    | 320 | 21.6±9.7<br>(2.0, 78.0)     | 0.01 |
| <b>Pulse, beats per minute</b>        | 200 | 80.9±13.5<br>(49.0, 114.0)  | 319 | 82.3±12.7<br>(50.0, 131.0)  | 0.22 |
| <b>Systolic blood pressure, mmHg</b>  | 200 | 127.0±14.0<br>(99.0, 186.0) | 319 | 124.3±14.7<br>(88.0, 162.0) | 0.03 |
| <b>Diastolic blood pressure, mmHg</b> | 200 | 80.7±10.1<br>(58.0, 116.0)  | 319 | 78.2±9.6<br>(57.0, 106.0)   | 0.01 |

Abbreviations: SD, standard deviation; Min., minimum; Max., maximum; cm, centimeter; kg, kilogram; GED, general education diploma; CPD, cigarettes per day; PSCDI, Penn State Cigarette Dependence Index; AUDIT-C, Alcohol Use Disorders Identification Test-Consumption; CES-D, Center for Epidemiologic Studies Depression Scale; COPD, Chronic Obstructive Pulmonary Disease; NNAL, 4-(methylnitrosamino)-1-(3-pyridyl)-1-butanol; BMI, body mass index; FEV1, Forced expiratory volume in one second; FVC, forced vital capacity; CO, carbon monoxide; CI, confidence interval.

^All baseline physiological measures obtained at week 0.

\* Based on Wilcoxon-Mann-Whitney test.

**Table S3. Detailed baseline characteristics by retention status**

|                                                   | Week 0-24 Complete<br>(N=332) |                           | Week 0-24 Incomplete<br>(N=188) |                           |        |
|---------------------------------------------------|-------------------------------|---------------------------|---------------------------------|---------------------------|--------|
| <b>Sociodemographics</b>                          | N                             | Mean±SD<br>(Min., Max.)   | N                               | Mean±SD<br>(Min., Max.)   | P      |
| <b>Age, year</b>                                  | 332                           | 47·7±11·3<br>(21·0, 65·0) | 188                             | 43·6±11·8<br>(21·0, 64·0) | 0·0001 |
| <b>Sex, %</b>                                     | 332                           |                           | 188                             |                           | 0·95   |
| <b>Male</b>                                       | 137                           | 41·3                      | 77                              | 41·0                      |        |
| <b>Female</b>                                     | 195                           | 58·7                      | 111                             | 59·0                      |        |
| <b>Race/Ethnicity, %</b>                          | 332                           |                           | 188                             |                           | 0·52   |
| <b>Caucasian/White NH</b>                         | 221                           | 66·6                      | 129                             | 68·6                      |        |
| <b>African American/Black NH</b>                  | 97                            | 29·2                      | 48                              | 25·5                      |        |
| <b>Other</b>                                      | 14                            | 4·2                       | 11                              | 5·9                       |        |
| <b>Hispanic, %</b>                                | 332                           |                           | 188                             |                           | 0·72   |
| <b>Yes</b>                                        | 6                             | 1·8                       | 2                               | 1·1                       |        |
| <b>Education, %</b>                               | 332                           |                           | 188                             |                           | 0·03   |
| <b>Less than 12<sup>th</sup> grade/No diploma</b> | 34                            | 10·2                      | 22                              | 11·7                      |        |
| <b>High school graduate/GED</b>                   | 90                            | 27·1                      | 64                              | 34·0                      |        |
| <b>Some college/No degree</b>                     | 106                           | 31·9                      | 64                              | 34·0                      |        |
| <b>Associate's degree</b>                         | 45                            | 13·6                      | 24                              | 12·8                      |        |
| <b>Bachelor's degree or higher</b>                | 57                            | 17·2                      | 14                              | 7·5                       |        |
| <b>Employment status, %</b>                       | 332                           |                           | 186                             |                           | 0·08   |
| <b>Full-time</b>                                  | 146                           | 44·0                      | 81                              | 43·6                      |        |
| <b>Part-time</b>                                  | 50                            | 15·1                      | 30                              | 16·1                      |        |
| <b>Retired</b>                                    | 33                            | 9·9                       | 7                               | 3·8                       |        |
| <b>Military</b>                                   | 1                             | 0·3                       | 0                               | 0·0                       |        |
| <b>Student</b>                                    | 6                             | 1·8                       | 1                               | 0·5                       |        |
| <b>Unemployed</b>                                 | 96                            | 28·9                      | 67                              | 36·0                      |        |
| <b>Total household income, %</b>                  | 326                           |                           | 184                             |                           | 0·15   |
| <b>Less than \$10,000</b>                         | 60                            | 18·4                      | 48                              | 26·1                      |        |
| <b>\$10,000-\$39,999</b>                          | 132                           | 40·5                      | 61                              | 33·2                      |        |
| <b>\$40,000-\$69,999</b>                          | 65                            | 19·9                      | 36                              | 19·6                      |        |

|                                                                      |     |                           |     |                           |       |
|----------------------------------------------------------------------|-----|---------------------------|-----|---------------------------|-------|
| \$70,000-\$99,999                                                    | 46  | 14.1                      | 21  | 11.4                      |       |
| \$100,000 or more                                                    | 23  | 7.1                       | 18  | 9.8                       |       |
| <b>Marital Status, %</b>                                             | 331 |                           | 187 |                           | 0.38  |
| <b>Married</b>                                                       | 99  | 29.9                      | 54  | 28.9                      |       |
| <b>Widowed</b>                                                       | 15  | 4.5                       | 6   | 3.2                       |       |
| <b>Divorced</b>                                                      | 63  | 19.0                      | 25  | 13.4                      |       |
| <b>Separated</b>                                                     | 20  | 6.0                       | 15  | 8.0                       |       |
| <b>Never married</b>                                                 | 77  | 23.3                      | 55  | 29.4                      |       |
| <b>Living with a partner</b>                                         | 48  | 14.5                      | 24  | 12.8                      |       |
| <b>Member of an unmarried couple (not living together)</b>           | 9   | 2.7                       | 8   | 4.3                       |       |
| <b>Baseline tobacco use characteristics</b>                          | N   | Mean±SD<br>(Min., Max.)   | N   | Mean±SD<br>(Min., Max.)   | P     |
| <b>Cigarettes per day (CPD)</b>                                      |     |                           |     |                           |       |
| <b>Week -1</b>                                                       | 332 | 19.5±9.0<br>(10.0, 100.0) | 188 | 20.9±8.8<br>(10.0, 60.0)  | 0.09  |
| <b>Week 0</b>                                                        | 332 | 18.1±7.1<br>(7.9, 50.9)   | 188 | 19.5±8.7<br>(8.7, 64.1)   | 0.05  |
| <b>Years smoking this number of CPD at week -1</b>                   | 332 | 17.6±13.5<br>(0.17, 50.0) | 188 | 14.5±12.3<br>(0.02, 50.0) | 0.01  |
| <b>Age of cigarette smoking initiation at week -1</b>                | 328 | 17.4±4.7<br>(6.0, 42.0)   | 186 | 16.3±3.7<br>(6.0, 35.0)   | 0.003 |
| <b>PSCDI score at week 0</b>                                         | 317 | 13.2±3.1<br>(5.0, 20.0)   | 178 | 13.8±2.7<br>(7.0, 20.0)   | 0.01  |
| <b>Menthol cigarette smoker, %</b>                                   | 332 |                           | 188 |                           | 0.62  |
| <b>Yes</b>                                                           | 210 | 63.3                      | 123 | 65.4                      |       |
| <b>Use of other tobacco product(s) in past 30 days at week -1, %</b> | 332 |                           | 188 |                           |       |
| <b>Yes</b>                                                           | 20  | 6.0                       | 11  | 5.9                       | 0.94  |
| <b>Baseline psychosocial/health characteristics</b>                  | N   | Mean±SD<br>(Min., Max.)   | N   | Mean±SD<br>(Min., Max.)   | P     |
| <b>AUDIT-C score at week -1</b>                                      | 326 | 2.4±2.4<br>(0.0, 11.0)    | 186 | 2.2±2.3<br>(0.0, 10.0)    | 0.46  |
| <b>Environmental smoke score at week 0, %</b>                        | 327 |                           | 183 |                           | 0.08  |
| <b>High exposure</b>                                                 | 94  | 28.8                      | 36  | 19.7                      |       |
| <b>Moderate exposure</b>                                             | 74  | 22.6                      | 48  | 26.2                      |       |
| <b>Little or no exposure</b>                                         | 159 | 48.6                      | 99  | 54.1                      |       |

|                                                          |     |                                    |     |                                    |       |
|----------------------------------------------------------|-----|------------------------------------|-----|------------------------------------|-------|
| <b>Kessler K6 score at week 0</b>                        | 324 | 4.8±4.1<br>(0.0, 21.0)             | 182 | 5.1±4.3<br>(0.0, 20.0)             | 0.35  |
| <b>Perceived Stress Scale score at week 0</b>            | 322 | 19.7±4.0<br>(0.0, 35.0)            | 183 | 20.2±4.2<br>(0.0, 35.0)            | 0.21  |
| <b>CES-D Score at week 0</b>                             | 305 | 12.3±9.7<br>(0.0, 44.0)            | 169 | 12.5±10.0<br>(0.0, 48.0)           | 0.85  |
| <b>Partial INTERHEART non-laboratory score at week 0</b> | 312 | 9.8±3.3<br>(0.0, 18.0)             | 182 | 10.3±3.5<br>(2.0, 20.0)            | 0.08  |
| <b>Clinical COPD Questionnaire score at week 0</b>       | 324 | 1.2±0.9<br>(0.0, 5.0)              | 182 | 1.3±0.9<br>(0.0, 5.3)              | 0.48  |
| <b>Baseline physiological measures<sup>^</sup></b>       | N   | Mean±SD<br>(Min., Max.)            | N   | Mean±SD<br>(Min., Max.)            | P     |
| <b>Urine total NNAL, pg/mg creatinine</b>                |     |                                    |     |                                    |       |
| <b>Median (IQR)<br/>(Min., Max.)</b>                     | 332 | 448.3 (714.1)<br>(1.0, 10680.6)    | 188 | 568.5 (728.1)<br>(0.4, 10985.0)    | 0.16* |
| <b>Geometric mean (95% CI)</b>                           | 332 | 408.6<br>(359.2, 464.9)            | 188 | 456.9<br>(383.8, 543.8)            | ..    |
| <b>Urine cotinine, ng/mg creatinine</b>                  |     |                                    |     |                                    |       |
| <b>Median (IQR)<br/>(Min., Max.)</b>                     | 332 | 1683.2 (1895.0)<br>(56.1, 11980.8) | 188 | 1662.1 (1925.0)<br>(64.1, 11459.2) | 0.57* |
| <b>Geometric mean (95% CI)</b>                           | 332 | 1546.7<br>(1406.0, 1701.5)         | 188 | 1593.3<br>(1396.4, 1817.9)         | ..    |
| <b>Waist circumference, cm</b>                           | 332 | 102.7±17.7<br>(63.5, 172.7)        | 186 | 103.1±19.0<br>(66.0, 154.9)        | 0.83  |
| <b>Hip circumference, cm</b>                             | 332 | 109.7±14.7<br>(71.1, 157.5)        | 186 | 110.1±16.1<br>(77.5, 162.6)        | 0.77  |
| <b>Height, cm</b>                                        | 332 | 169.7±9.0<br>(141.0, 190.5)        | 187 | 170.8±9.7<br>(143.5, 193.0)        | 0.19  |
| <b>Weight, kg</b>                                        | 332 | 85.2±21.1<br>(39.3, 151.7)         | 188 | 87.6±25.9<br>(43.9, 167.4)         | 0.29  |
| <b>BMI, kg/m<sup>2</sup></b>                             | 332 | 29.8±6.9<br>(14.7, 52.8)           | 187 | 30.2±8.0<br>(16.6, 55.9)           | 0.59  |
| <b>FEV1, cm<sup>3</sup></b>                              | 331 | 2619.1±816.1<br>(540.0, 4760.0)    | 187 | 2744.7±915.6<br>(900.0, 5710.0)    | 0.11  |
| <b>FVC, cm<sup>3</sup></b>                               | 331 | 3327.7±949.9<br>(540.0, 6530.0)    | 187 | 3521.0±1084.9<br>(1320.0, 6920.0)  | 0.04  |

|                                       |     |                             |     |                             |      |
|---------------------------------------|-----|-----------------------------|-----|-----------------------------|------|
| <b>Exhaled CO, parts per million</b>  | 332 | 22·2±11<br>(4·0, 92·0)      | 188 | 23·5±11·8<br>(2·0, 74·0)    | 0·23 |
| <b>Pulse, beats per minute</b>        | 332 | 81·5±12·9<br>(49·0, 114·0)  | 187 | 82·4±13·4<br>(50·0, 131·0)  | 0·44 |
| <b>Systolic blood pressure, mmHg</b>  | 332 | 125·6±13·8<br>(91·0, 167·0) | 187 | 124·9±15·6<br>(88·0, 186·0) | 0·60 |
| <b>Diastolic blood pressure, mmHg</b> | 332 | 79·5±9·9<br>(57·0, 111·0)   | 187 | 78·6±9·9<br>(59·0, 116·0)   | 0·33 |

Abbreviations: SD, standard deviation; Min., minimum; Max., maximum; cm, centimeter; kg, kilogram; GED, general education diploma; CPD, cigarettes per day; PSCDI, Penn State Cigarette Dependence Index; AUDIT-C, Alcohol Use Disorders Identification Test-Consumption; CES-D, Center for Epidemiologic Studies Depression Scale; COPD, Chronic Obstructive Pulmonary Disease; NNAL, 4-(methylnitrosamino)-1-(3-pyridyl)-1-butanol; BMI, body mass index; FEV1, Forced expiratory volume in one second; FVC, forced vital capacity; CO, carbon monoxide; CI, confidence interval.

^All baseline physiological measures obtained at week 0.

\* Based on Wilcoxon-Mann-Whitney test.

**Table S4. Retention outcome pre/post randomisation including reasons for withdrawal by condition and study period**

Note: W=week. W0-W24 = study intervention period. W25-W36=follow-up period.

|                                                          | Baseline | CIG SUB<br>(N=130) |         | 0 mg/ml<br>(N=130) |         | 8 mg/ml<br>(N=130) |         | 36 mg/ml<br>(N=130) |         | Total            |
|----------------------------------------------------------|----------|--------------------|---------|--------------------|---------|--------------------|---------|---------------------|---------|------------------|
|                                                          |          | W0-W24             | W25-W36 | W0-W24             | W25-W36 | W0-W24             | W25-W36 | W0-W24              | W25-W36 |                  |
| <b>Retention pre-randomisation</b>                       |          |                    |         |                    |         |                    |         |                     |         |                  |
| Failed at Visit 1 (inclusion-exclusion criteria)         | 90       | ..                 | ..      | ..                 | ..      | ..                 | ..      | ..                  | ..      | 90               |
| Failed at Visit 2 (no show/inclusion-exclusion criteria) | 73       | ..                 | ..      | ..                 | ..      | ..                 | ..      | ..                  | ..      | 73               |
| Failed at Visit 2 for SAE (Death)                        | 1        | ..                 | ..      | ..                 | ..      | ..                 | ..      | ..                  | ..      | 1                |
| Subtotal                                                 | 164      | ..                 | ..      | ..                 | ..      | ..                 | ..      | ..                  | ..      | 164              |
| <b>Retention post-randomisation</b>                      |          |                    |         |                    |         |                    |         |                     |         |                  |
| Withdrawn                                                | ..       | 39                 | 6       | 56                 | 8       | 49                 | 10      | 44                  | 11      | 223              |
| <b>Participant decision</b>                              |          |                    |         |                    |         |                    |         |                     |         |                  |
| No reasons given                                         | ..       | 10                 | 1       | 15                 | 1       | 11                 | 1       | 10                  | 0       | 49               |
| Unable to keep appointments                              | ..       | 2                  | 0       | 3                  | 0       | 1                  | 0       | 1                   | 0       | 7                |
| Did not like study product                               | ..       | 0                  | 0       | 6                  | 1       | 5                  | 0       | 3                   | 0       | 15               |
| Study location access                                    | ..       | 0                  | 0       | 2                  | 0       | 3                  | 0       | 1                   | 0       | 6                |
| Personal reasons                                         | ..       | 2                  | 0       | 1                  | 0       | 0                  | 0       | 0                   | 0       | 3                |
| Other*                                                   | ..       | 6                  | 1       | 1                  | 0       | 2                  | 1       | 4                   | 0       | 15               |
| <b>PI decision</b>                                       |          |                    |         |                    |         |                    |         |                     |         |                  |
| No show at three consecutive appointments                | ..       | 0                  | 0       | 2                  | 0       | 0                  | 0       | 1                   | 0       | 3                |
| Missed final study visit (Visit 12)                      | ..       | 29                 | 5       | 41                 | 7       | 38                 | 9       | 34                  | 11      | 174              |
| Unable to use study product 2+ weeks                     | ..       | 27                 | 0       | 37                 | 4       | 32                 | 7       | 28                  | 6       | 141              |
| New pregnancy                                            | ..       | ..                 | 5       | ..                 | 2       | ..                 | 2       | ..                  | 4       | 13               |
| Psychiatric hospitalization                              | ..       | 0                  | ..      | 1                  | ..      | 0                  | ..      | 2                   | ..      | 3                |
| Death                                                    | ..       | 0                  | 0       | 0                  | 0       | 1                  | 0       | 1                   | 1       | 3                |
| Other SAE^                                               | ..       | 1                  | 0       | 2                  | 1       | 0                  | 0       | 0                   | 0       | 4                |
| Other#                                                   | ..       | 0                  | 0       | 0                  | 0       | 2                  | 0       | 1                   | 0       | 4                |
| <b>Completed</b>                                         |          |                    |         |                    |         |                    |         |                     |         |                  |
| Subtotal                                                 | ..       | 91                 | 85      | 74                 | 66      | 81                 | 71      | 86                  | 75      | 297 <sup>†</sup> |
| Subtotal                                                 | 520      |                    |         |                    |         |                    |         |                     |         |                  |
| <b>Total (among participants who attended Visit 1)</b>   | 684      |                    |         |                    |         |                    |         |                     |         |                  |



\* Participant decision other (cessation medication use/trying to quit, N=1; participant reported the study was not benefiting them, N=1; participant reported negative physical/mental effects associated with study, N=1).

^ SAE (critical lab value at visit 2, N=1; new chronic disease diagnosis/hospitalization, N=3).

# PI decision other (increased blood pressure, N=1; seizure during visit 2, N=1; AE that led to study product use discontinuation, N=1; medical history/visit 2 lab values, N=2).

‡ Participants completed full trial including both study intervention period and follow-up period.

**Table S5. Summary of significance**

| Analysis                                                                                                   | Control* | Pairwise comparison  | Table number        |
|------------------------------------------------------------------------------------------------------------|----------|----------------------|---------------------|
| <b>Urinary total NNAL</b>                                                                                  |          |                      |                     |
| <b>Between conditions at each time point using multiple imputation method unadjusted</b>                   | W24      | CS vs. 36 mg/ml      | <a href="#">S11</a> |
| <b>Between conditions at each time point using last-observation-carried-forward method unadjusted</b>      | W24      | 0 mg/ml vs. 36 mg/ml | <a href="#">S15</a> |
| <b>Between conditions at each time point using multiple imputation method adjusted</b>                     | W24      | CS vs. 36 mg/ml      | <a href="#">S11</a> |
| <b>Between conditions at each time point using intent-to-treat method adjusted</b>                         | W24      | CS vs. 36 mg/ml      | <a href="#">S12</a> |
| <b>Between conditions at each time point using per-protocol method adjusted</b>                            | W24      | CS vs. 36 mg/ml      | <a href="#">S13</a> |
| <b>Between conditions at each time point using baseline-carried-forward method adjusted</b>                | W24      | CS vs. 36 mg/ml      | <a href="#">S14</a> |
|                                                                                                            | W24      | 0 mg/ml vs. 36 mg/ml | <a href="#">S14</a> |
| <b>Between conditions at each time point using last-observation-carried-forward method adjusted</b>        | W12      | 0 mg/ml vs. 36 mg/ml | <a href="#">S15</a> |
|                                                                                                            | W24      | 0 mg/ml vs. 36 mg/ml | <a href="#">S15</a> |
| <b>Relative to baseline within each condition using multiple imputation method unadjusted</b>              | 36 mg/ml | W12 vs. W0           | <a href="#">S16</a> |
|                                                                                                            | 36 mg/ml | W24 vs. W0           | <a href="#">S16</a> |
| <b>Relative to baseline within each condition using intent-to-treat method unadjusted</b>                  | 36 mg/ml | W12 vs. W0           | <a href="#">S17</a> |
|                                                                                                            | 36 mg/ml | W24 vs. W0           | <a href="#">S17</a> |
| <b>Relative to baseline within each condition using per-protocol method unadjusted</b>                     | 36 mg/ml | W12 vs. W0           | <a href="#">S18</a> |
|                                                                                                            | 36 mg/ml | W24 vs. W0           | <a href="#">S18</a> |
| <b>Relative to baseline within each condition using baseline-carried-forward method unadjusted</b>         | 36 mg/ml | W12 vs. W0           | <a href="#">S19</a> |
|                                                                                                            | 36 mg/ml | W24 vs. W0           | <a href="#">S19</a> |
| <b>Relative to baseline within each condition using last-observation-carried-forward method unadjusted</b> | 36 mg/ml | W4 vs. W0            | <a href="#">S20</a> |
|                                                                                                            | 36 mg/ml | W12 vs. W0           | <a href="#">S20</a> |
|                                                                                                            | 36 mg/ml | W24 vs. W0           | <a href="#">S20</a> |
| <b>Relative to baseline within each condition using multiple imputation method adjusted</b>                | 36 mg/ml | W12 vs. W0           | <a href="#">S16</a> |
|                                                                                                            | 36 mg/ml | W24 vs. W0           | <a href="#">S16</a> |
| <b>Relative to baseline within each condition using intent-to-treat method adjusted</b>                    | 36 mg/ml | W12 vs. W0           | <a href="#">S17</a> |
|                                                                                                            | 36 mg/ml | W24 vs. W0           | <a href="#">S17</a> |
| <b>Relative to baseline within each condition using per-protocol method adjusted</b>                       | 36 mg/ml | W12 vs. W0           | <a href="#">S18</a> |
|                                                                                                            | 36 mg/ml | W24 vs. W0           | <a href="#">S18</a> |
| <b>Relative to baseline within each condition using baseline-carried-forward method adjusted</b>           | 36 mg/ml | W12 vs. W0           | <a href="#">S19</a> |
|                                                                                                            | 36 mg/ml | W24 vs. W0           | <a href="#">S19</a> |
| <b>Relative to baseline within each condition using last-observation-carried-forward method adjusted</b>   | 36 mg/ml | W4 vs. W0            | <a href="#">S20</a> |
|                                                                                                            | 36 mg/ml | W12 vs. W0           | <a href="#">S20</a> |

|                                                                                                            |          |                      |                     |
|------------------------------------------------------------------------------------------------------------|----------|----------------------|---------------------|
|                                                                                                            | 36 mg/ml | W24 vs. W0           | <a href="#">S20</a> |
| <b>Urinary cotinine</b>                                                                                    |          |                      |                     |
| <b>Between conditions at each time point using intent-to-treat method adjusted</b>                         | W4       | 8 mg/ml vs. 36 mg/ml | <a href="#">S27</a> |
| <b>Between conditions at each time point using baseline-carried-forward method adjusted</b>                | W4       | 8 mg/ml vs. 36 mg/ml | <a href="#">S29</a> |
| <b>Relative to baseline within each condition using multiple imputation method unadjusted</b>              | 8 mg/ml  | W4 vs. W0            | <a href="#">S31</a> |
|                                                                                                            | 8 mg/ml  | W12 vs. W0           | <a href="#">S31</a> |
|                                                                                                            | 8 mg/ml  | W24 vs. W0           | <a href="#">S31</a> |
| <b>Relative to baseline within each condition using intent-to-treat method unadjusted</b>                  | 8 mg/ml  | W4 vs. W0            | <a href="#">S32</a> |
|                                                                                                            | 8 mg/ml  | W12 vs. W0           | <a href="#">S32</a> |
|                                                                                                            | 8 mg/ml  | W24 vs. W0           | <a href="#">S32</a> |
| <b>Relative to baseline within each condition using per-protocol method unadjusted</b>                     | 8 mg/ml  | W12 vs. W0           | <a href="#">S33</a> |
| <b>Relative to baseline within each condition using baseline-carried-forward method unadjusted</b>         | 8 mg/ml  | W4 vs. W0            | <a href="#">S34</a> |
|                                                                                                            | 8 mg/ml  | W12 vs. W0           | <a href="#">S34</a> |
| <b>Relative to baseline within each condition using last-observation-carried-forward method unadjusted</b> | 8 mg/ml  | W4 vs. W0            | <a href="#">S35</a> |
|                                                                                                            | 8 mg/ml  | W12 vs. W0           | <a href="#">S35</a> |
|                                                                                                            | 8 mg/ml  | W24 vs. W0           | <a href="#">S35</a> |
| <b>Relative to baseline within each condition using multiple imputation method adjusted</b>                | CS       | W12 vs. W0           | <a href="#">S31</a> |
|                                                                                                            | 8 mg/ml  | W4 vs. W0            | <a href="#">S31</a> |
|                                                                                                            | 8 mg/ml  | W12 vs. W0           | <a href="#">S31</a> |
|                                                                                                            | 8 mg/ml  | W24 vs. W0           | <a href="#">S31</a> |
| <b>Relative to baseline within each condition using intent-to-treat method adjusted</b>                    | 8 mg/ml  | W4 vs. W0            | <a href="#">S32</a> |
|                                                                                                            | 8 mg/ml  | W12 vs. W0           | <a href="#">S32</a> |
|                                                                                                            | 8 mg/ml  | W24 vs. W0           | <a href="#">S32</a> |
| <b>Relative to baseline within each condition using per-protocol method adjusted</b>                       | 8 mg/ml  | W24 vs. W0           | <a href="#">S33</a> |
| <b>Relative to baseline within each condition using baseline-carried-forward method adjusted</b>           | 8 mg/ml  | W4 vs. W0            | <a href="#">S34</a> |
|                                                                                                            | 8 mg/ml  | W12 vs. W0           | <a href="#">S34</a> |
| <b>Relative to baseline within each condition using last-observation-carried-forward method adjusted</b>   | 8 mg/ml  | W4 vs. W0            | <a href="#">S35</a> |
|                                                                                                            | 8 mg/ml  | W12 vs. W0           | <a href="#">S35</a> |
|                                                                                                            | 8 mg/ml  | W24 vs. W0           | <a href="#">S35</a> |
| <b>Exhaled carbon monoxide</b>                                                                             |          |                      |                     |
| <b>Between conditions at each time point using multiple imputation method unadjusted</b>                   | W1       | CS vs. 8 mg/ml       | <a href="#">S41</a> |
|                                                                                                            | W1       | CS vs. 36 mg/ml      | <a href="#">S41</a> |
|                                                                                                            | W1       | 0 mg/ml vs. 8 mg/ml  | <a href="#">S41</a> |
|                                                                                                            | W2       | CS vs. 8 mg/ml       | <a href="#">S41</a> |

|                                                                                      |     |                      |                     |
|--------------------------------------------------------------------------------------|-----|----------------------|---------------------|
|                                                                                      | W2  | 0 mg/ml vs. 8 mg/ml  | <a href="#">S41</a> |
|                                                                                      | W4  | CS vs. 8 mg/ml       | <a href="#">S41</a> |
|                                                                                      | W4  | CS vs. 36 mg/ml      | <a href="#">S41</a> |
|                                                                                      | W4  | 0 mg/ml vs. 8 mg/ml  | <a href="#">S41</a> |
|                                                                                      | W4  | 0 mg/ml vs. 36 mg/ml | <a href="#">S41</a> |
|                                                                                      | W8  | CS vs. 8 mg/ml       | <a href="#">S41</a> |
|                                                                                      | W8  | CS vs. 36 mg/ml      | <a href="#">S41</a> |
|                                                                                      | W12 | 0 mg/ml vs. 8 mg/ml  | <a href="#">S41</a> |
|                                                                                      | W12 | 0 mg/ml vs. 36 mg/ml | <a href="#">S41</a> |
|                                                                                      | W16 | CS vs. 8 mg/ml       | <a href="#">S41</a> |
|                                                                                      | W16 | CS vs. 36 mg/ml      | <a href="#">S41</a> |
|                                                                                      | W16 | 0 mg/ml vs. 8 mg/ml  | <a href="#">S41</a> |
|                                                                                      | W16 | 0 mg/ml vs. 36 mg/ml | <a href="#">S41</a> |
|                                                                                      | W20 | CS vs. 8 mg/ml       | <a href="#">S41</a> |
|                                                                                      | W20 | CS vs. 36 mg/ml      | <a href="#">S41</a> |
|                                                                                      | W20 | 0 mg/ml vs. 8 mg/ml  | <a href="#">S41</a> |
|                                                                                      | W20 | 0 mg/ml vs. 36 mg/ml | <a href="#">S41</a> |
|                                                                                      | W24 | CS vs. 36 mg/ml      | <a href="#">S41</a> |
|                                                                                      | W24 | 0 mg/ml vs. 36 mg/ml | <a href="#">S41</a> |
| <b>Between conditions at each time point using intent-to-treat method unadjusted</b> | W1  | CS vs. 8 mg/ml       | <a href="#">S42</a> |
|                                                                                      | W1  | 0 mg/ml vs. 8 mg/ml  | <a href="#">S42</a> |
|                                                                                      | W2  | CS vs. 8 mg/ml       | <a href="#">S42</a> |
|                                                                                      | W2  | CS vs. 36 mg/ml      | <a href="#">S42</a> |
|                                                                                      | W2  | 0 mg/ml vs. 8 mg/ml  | <a href="#">S42</a> |
|                                                                                      | W4  | CS vs. 8 mg/ml       | <a href="#">S42</a> |
|                                                                                      | W4  | CS vs. 36 mg/ml      | <a href="#">S42</a> |
|                                                                                      | W4  | 0 mg/ml vs. 36 mg/ml | <a href="#">S42</a> |
|                                                                                      | W8  | CS vs. 8 mg/ml       | <a href="#">S42</a> |
|                                                                                      | W8  | CS vs. 36 mg/ml      | <a href="#">S42</a> |
|                                                                                      | W12 | 0 mg/ml vs. 36 mg/ml | <a href="#">S42</a> |
|                                                                                      | W16 | CS vs. 8 mg/ml       | <a href="#">S42</a> |
|                                                                                      | W16 | CS vs. 36 mg/ml      | <a href="#">S42</a> |
|                                                                                      | W16 | 0 mg/ml vs. 8 mg/ml  | <a href="#">S42</a> |
|                                                                                      | W16 | 0 mg/ml vs. 36 mg/ml | <a href="#">S42</a> |
|                                                                                      | W20 | CS vs. 8 mg/ml       | <a href="#">S42</a> |
|                                                                                      | W20 | CS vs. 36 mg/ml      | <a href="#">S42</a> |

|                                                                                               |     |                      |                     |
|-----------------------------------------------------------------------------------------------|-----|----------------------|---------------------|
|                                                                                               | W20 | 0 mg/ml vs. 36 mg/ml | <a href="#">S42</a> |
| <b>Between conditions at each time point using per-protocol method unadjusted</b>             | W1  | CS vs. 8 mg/ml       | <a href="#">S43</a> |
|                                                                                               | W2  | CS vs. 8 mg/ml       | <a href="#">S43</a> |
|                                                                                               | W4  | CS vs. 8 mg/ml       | <a href="#">S43</a> |
|                                                                                               | W4  | CS vs. 36 mg/ml      | <a href="#">S43</a> |
|                                                                                               | W8  | CS vs. 8 mg/ml       | <a href="#">S43</a> |
|                                                                                               | W8  | CS vs. 36 mg/ml      | <a href="#">S43</a> |
|                                                                                               | W12 | 0 mg/ml vs. 36 mg/ml | <a href="#">S43</a> |
|                                                                                               | W16 | CS vs. 8 mg/ml       | <a href="#">S43</a> |
|                                                                                               | W16 | CS vs. 36 mg/ml      | <a href="#">S43</a> |
|                                                                                               | W16 | 0 mg/ml vs. 8 mg/ml  | <a href="#">S43</a> |
|                                                                                               | W16 | 0 mg/ml vs. 36 mg/ml | <a href="#">S43</a> |
|                                                                                               | W20 | CS vs. 8 mg/ml       | <a href="#">S43</a> |
|                                                                                               | W20 | CS vs. 36 mg/ml      | <a href="#">S43</a> |
|                                                                                               | W20 | 0 mg/ml vs. 36 mg/ml | <a href="#">S43</a> |
|                                                                                               | W24 | CS vs. 36 mg/ml      | <a href="#">S43</a> |
| <b>Between conditions at each time point using baseline-carried-forward method unadjusted</b> | W1  | CS vs. 8 mg/ml       | <a href="#">S44</a> |
|                                                                                               | W1  | 0 mg/ml vs. 8 mg/ml  | <a href="#">S44</a> |
|                                                                                               | W2  | CS vs. 8 mg/ml       | <a href="#">S44</a> |
|                                                                                               | W2  | CS vs. 36 mg/ml      | <a href="#">S44</a> |
|                                                                                               | W2  | 0 mg/ml vs. 8 mg/ml  | <a href="#">S44</a> |
|                                                                                               | W4  | CS vs. 8 mg/ml       | <a href="#">S44</a> |
|                                                                                               | W4  | CS vs. 36 mg/ml      | <a href="#">S44</a> |
|                                                                                               | W4  | 0 mg/ml vs. 8 mg/ml  | <a href="#">S44</a> |
|                                                                                               | W4  | 0 mg/ml vs. 36 mg/ml | <a href="#">S44</a> |
|                                                                                               | W8  | CS vs. 8 mg/ml       | <a href="#">S44</a> |
|                                                                                               | W8  | CS vs. 36 mg/ml      | <a href="#">S44</a> |
|                                                                                               | W8  | 0 mg/ml vs. 36 mg/ml | <a href="#">S44</a> |
|                                                                                               | W12 | 0 mg/ml vs. 8 mg/ml  | <a href="#">S44</a> |
|                                                                                               | W12 | 0 mg/ml vs. 36 mg/ml | <a href="#">S44</a> |
|                                                                                               | W16 | CS vs. 8 mg/ml       | <a href="#">S44</a> |
|                                                                                               | W16 | CS vs. 36 mg/ml      | <a href="#">S44</a> |
|                                                                                               | W16 | 0 mg/ml vs. 8 mg/ml  | <a href="#">S44</a> |
|                                                                                               | W16 | 0 mg/ml vs. 36 mg/ml | <a href="#">S44</a> |
|                                                                                               | W20 | CS vs. 8 mg/ml       | <a href="#">S44</a> |
|                                                                                               | W20 | CS vs. 36 mg/ml      | <a href="#">S44</a> |

|                                                                                                       |     |                      |                     |
|-------------------------------------------------------------------------------------------------------|-----|----------------------|---------------------|
|                                                                                                       | W20 | 0 mg/ml vs. 8 mg/ml  | <a href="#">S44</a> |
|                                                                                                       | W20 | 0 mg/ml vs. 36 mg/ml | <a href="#">S44</a> |
|                                                                                                       | W24 | 0 mg/ml vs. 36 mg/ml | <a href="#">S44</a> |
| <b>Between conditions at each time point using last-observation-carried-forward method unadjusted</b> | W1  | CS vs. 8 mg/ml       | <a href="#">S45</a> |
|                                                                                                       | W1  | 0 mg/ml vs. 8 mg/ml  | <a href="#">S45</a> |
|                                                                                                       | W2  | CS vs. 8 mg/ml       | <a href="#">S45</a> |
|                                                                                                       | W2  | CS vs. 36 mg/ml      | <a href="#">S45</a> |
|                                                                                                       | W2  | 0 mg/ml vs. 8 mg/ml  | <a href="#">S45</a> |
|                                                                                                       | W4  | CS vs. 8 mg/ml       | <a href="#">S45</a> |
|                                                                                                       | W4  | CS vs. 36 mg/ml      | <a href="#">S45</a> |
|                                                                                                       | W4  | 0 mg/ml vs. 8 mg/ml  | <a href="#">S45</a> |
|                                                                                                       | W4  | 0 mg/ml vs. 36 mg/ml | <a href="#">S45</a> |
|                                                                                                       | W8  | CS vs. 8 mg/ml       | <a href="#">S45</a> |
|                                                                                                       | W8  | CS vs. 36 mg/ml      | <a href="#">S45</a> |
|                                                                                                       | W8  | 0 mg/ml vs. 8 mg/ml  | <a href="#">S45</a> |
|                                                                                                       | W8  | 0 mg/ml vs. 36 mg/ml | <a href="#">S45</a> |
|                                                                                                       | W12 | 0 mg/ml vs. 8 mg/ml  | <a href="#">S45</a> |
|                                                                                                       | W12 | 0 mg/ml vs. 36 mg/ml | <a href="#">S45</a> |
|                                                                                                       | W16 | CS vs. 8 mg/ml       | <a href="#">S45</a> |
|                                                                                                       | W16 | CS vs. 36 mg/ml      | <a href="#">S45</a> |
|                                                                                                       | W16 | 0 mg/ml vs. 8 mg/ml  | <a href="#">S45</a> |
|                                                                                                       | W16 | 0 mg/ml vs. 36 mg/ml | <a href="#">S45</a> |
|                                                                                                       | W20 | CS vs. 8 mg/ml       | <a href="#">S45</a> |
|                                                                                                       | W20 | CS vs. 36 mg/ml      | <a href="#">S45</a> |
|                                                                                                       | W20 | 0 mg/ml vs. 8 mg/ml  | <a href="#">S45</a> |
|                                                                                                       | W20 | 0 mg/ml vs. 36 mg/ml | <a href="#">S45</a> |
|                                                                                                       | W24 | 0 mg/ml vs. 8 mg/ml  | <a href="#">S45</a> |
|                                                                                                       | W24 | 0 mg/ml vs. 36 mg/ml | <a href="#">S45</a> |
| <b>Between conditions at each time point using multiple imputation method adjusted</b>                | W1  | CS vs. 8 mg/ml       | <a href="#">S41</a> |
|                                                                                                       | W1  | 0 mg/ml vs. 8 mg/ml  | <a href="#">S41</a> |
|                                                                                                       | W2  | CS vs. 8 mg/ml       | <a href="#">S41</a> |
|                                                                                                       | W4  | CS vs. 8 mg/ml       | <a href="#">S41</a> |
|                                                                                                       | W4  | CS vs. 36 mg/ml      | <a href="#">S41</a> |
|                                                                                                       | W4  | 0 mg/ml vs. 8 mg/ml  | <a href="#">S41</a> |
|                                                                                                       | W4  | 0 mg/ml vs. 36 mg/ml | <a href="#">S41</a> |
|                                                                                                       | W8  | CS vs. 8 mg/ml       | <a href="#">S41</a> |

|                                                                                    |     |                      |                     |
|------------------------------------------------------------------------------------|-----|----------------------|---------------------|
|                                                                                    | W8  | CS vs. 36 mg/ml      | <a href="#">S41</a> |
|                                                                                    | W12 | 0 mg/ml vs. 36 mg/ml | <a href="#">S41</a> |
|                                                                                    | W16 | CS vs. 8 mg/ml       | <a href="#">S41</a> |
|                                                                                    | W16 | CS vs. 36 mg/ml      | <a href="#">S41</a> |
|                                                                                    | W16 | 0 mg/ml vs. 8 mg/ml  | <a href="#">S41</a> |
|                                                                                    | W16 | 0 mg/ml vs. 36 mg/ml | <a href="#">S41</a> |
|                                                                                    | W20 | CS vs. 36 mg/ml      | <a href="#">S41</a> |
|                                                                                    | W20 | 0 mg/ml vs. 8 mg/ml  | <a href="#">S41</a> |
|                                                                                    | W20 | 0 mg/ml vs. 36 mg/ml | <a href="#">S41</a> |
|                                                                                    | W24 | CS vs. 36 mg/ml      | <a href="#">S41</a> |
| <b>Between conditions at each time point using intent-to-treat method adjusted</b> | W1  | CS vs. 8 mg/ml       | <a href="#">S42</a> |
|                                                                                    | W2  | CS vs. 8 mg/ml       | <a href="#">S42</a> |
|                                                                                    | W2  | CS vs. 36 mg/ml      | <a href="#">S42</a> |
|                                                                                    | W4  | CS vs. 8 mg/ml       | <a href="#">S42</a> |
|                                                                                    | W4  | CS vs. 36 mg/ml      | <a href="#">S42</a> |
|                                                                                    | W8  | CS vs. 8 mg/ml       | <a href="#">S42</a> |
|                                                                                    | W8  | CS vs. 36 mg/ml      | <a href="#">S42</a> |
|                                                                                    | W12 | 0 mg/ml vs. 8 mg/ml  | <a href="#">S42</a> |
|                                                                                    | W12 | 0 mg/ml vs. 36 mg/ml | <a href="#">S42</a> |
|                                                                                    | W16 | CS vs. 8 mg/ml       | <a href="#">S42</a> |
|                                                                                    | W16 | CS vs. 36 mg/ml      | <a href="#">S42</a> |
|                                                                                    | W16 | 0 mg/ml vs. 8 mg/ml  | <a href="#">S42</a> |
|                                                                                    | W16 | 0 mg/ml vs. 36 mg/ml | <a href="#">S42</a> |
|                                                                                    | W20 | CS vs. 36 mg/ml      | <a href="#">S42</a> |
|                                                                                    | W20 | 0 mg/ml vs. 36 mg/ml | <a href="#">S42</a> |
|                                                                                    | W24 | CS vs. 36 mg/ml      | <a href="#">S42</a> |
| <b>Between conditions at each time point using per-protocol method adjusted</b>    | W1  | CS vs. 8 mg/ml       | <a href="#">S43</a> |
|                                                                                    | W2  | CS vs. 8 mg/ml       | <a href="#">S43</a> |
|                                                                                    | W4  | CS vs. 8 mg/ml       | <a href="#">S43</a> |
|                                                                                    | W4  | CS vs. 36 mg/ml      | <a href="#">S43</a> |
|                                                                                    | W8  | CS vs. 36 mg/ml      | <a href="#">S43</a> |
|                                                                                    | W12 | 0 mg/ml vs. 36 mg/ml | <a href="#">S43</a> |
|                                                                                    | W16 | CS vs. 8 mg/ml       | <a href="#">S43</a> |
|                                                                                    | W16 | CS vs. 36 mg/ml      | <a href="#">S43</a> |
|                                                                                    | W16 | 0 mg/ml vs. 8 mg/ml  | <a href="#">S43</a> |
|                                                                                    | W16 | 0 mg/ml vs. 36 mg/ml | <a href="#">S43</a> |

|                                                                                                     |     |                      |                     |
|-----------------------------------------------------------------------------------------------------|-----|----------------------|---------------------|
|                                                                                                     | W20 | CS vs. 36 mg/ml      | <a href="#">S43</a> |
|                                                                                                     | W20 | 0 mg/ml vs. 36 mg/ml | <a href="#">S43</a> |
|                                                                                                     | W24 | CS vs. 36 mg/ml      | <a href="#">S43</a> |
| <b>Between conditions at each time point using baseline-carried-forward method adjusted</b>         | W1  | CS vs. 8 mg/ml       | <a href="#">S44</a> |
|                                                                                                     | W2  | CS vs. 8 mg/ml       | <a href="#">S44</a> |
|                                                                                                     | W2  | CS vs. 36 mg/ml      | <a href="#">S44</a> |
|                                                                                                     | W4  | CS vs. 8 mg/ml       | <a href="#">S44</a> |
|                                                                                                     | W4  | CS vs. 36 mg/ml      | <a href="#">S44</a> |
|                                                                                                     | W4  | 0 mg/ml vs. 8 mg/ml  | <a href="#">S44</a> |
|                                                                                                     | W4  | 0 mg/ml vs. 36 mg/ml | <a href="#">S44</a> |
|                                                                                                     | W8  | CS vs. 36 mg/ml      | <a href="#">S44</a> |
|                                                                                                     | W12 | 0 mg/ml vs. 8 mg/ml  | <a href="#">S44</a> |
|                                                                                                     | W12 | 0 mg/ml vs. 36 mg/ml | <a href="#">S44</a> |
|                                                                                                     | W16 | CS vs. 8 mg/ml       | <a href="#">S44</a> |
|                                                                                                     | W16 | CS vs. 36 mg/ml      | <a href="#">S44</a> |
|                                                                                                     | W16 | 0 mg/ml vs. 8 mg/ml  | <a href="#">S44</a> |
|                                                                                                     | W16 | 0 mg/ml vs. 36 mg/ml | <a href="#">S44</a> |
|                                                                                                     | W20 | CS vs. 36 mg/ml      | <a href="#">S44</a> |
|                                                                                                     | W20 | 0 mg/ml vs. 8 mg/ml  | <a href="#">S44</a> |
|                                                                                                     | W20 | 0 mg/ml vs. 36 mg/ml | <a href="#">S44</a> |
|                                                                                                     | W24 | 0 mg/ml vs. 36 mg/ml | <a href="#">S44</a> |
| <b>Between conditions at each time point using last-observation-carried-forward method adjusted</b> | W1  | CS vs. 8 mg/ml       | <a href="#">S45</a> |
|                                                                                                     | W2  | CS vs. 8 mg/ml       | <a href="#">S45</a> |
|                                                                                                     | W2  | CS vs. 36 mg/ml      | <a href="#">S45</a> |
|                                                                                                     | W4  | CS vs. 8 mg/ml       | <a href="#">S45</a> |
|                                                                                                     | W4  | CS vs. 36 mg/ml      | <a href="#">S45</a> |
|                                                                                                     | W8  | CS vs. 8 mg/ml       | <a href="#">S45</a> |
|                                                                                                     | W8  | CS vs. 36 mg/ml      | <a href="#">S45</a> |
|                                                                                                     | W12 | 0 mg/ml vs. 8 mg/ml  | <a href="#">S45</a> |
|                                                                                                     | W12 | 0 mg/ml vs. 36 mg/ml | <a href="#">S45</a> |
|                                                                                                     | W16 | CS vs. 8 mg/ml       | <a href="#">S45</a> |
|                                                                                                     | W16 | CS vs. 36 mg/ml      | <a href="#">S45</a> |
|                                                                                                     | W16 | 0 mg/ml vs. 8 mg/ml  | <a href="#">S45</a> |
|                                                                                                     | W16 | 0 mg/ml vs. 36 mg/ml | <a href="#">S45</a> |
|                                                                                                     | W20 | CS vs. 8 mg/ml       | <a href="#">S45</a> |
|                                                                                                     | W20 | CS vs. 36 mg/ml      | <a href="#">S45</a> |



|                                                                                                            |          |                                   |                     |
|------------------------------------------------------------------------------------------------------------|----------|-----------------------------------|---------------------|
|                                                                                                            | W20      | 0 mg/ml vs. 8 mg/ml               | <a href="#">S45</a> |
|                                                                                                            | W20      | 0 mg/ml vs. 36 mg/ml              | <a href="#">S45</a> |
| <b>Relative to baseline within each condition using multiple imputation method unadjusted</b>              | 0 mg/ml  | W2 vs. W0                         | <a href="#">S46</a> |
|                                                                                                            | 8 mg/ml  | All weeks except week 24          | <a href="#">S46</a> |
|                                                                                                            | 36 mg/ml | All weeks                         | <a href="#">S46</a> |
| <b>Relative to baseline within each condition using intent-to-treat method unadjusted</b>                  | CS       | W1 vs. W0                         | <a href="#">S47</a> |
|                                                                                                            | CS       | W4 vs. W0                         | <a href="#">S47</a> |
|                                                                                                            | CS       | W12 vs. W0                        | <a href="#">S47</a> |
|                                                                                                            | 0 mg/ml  | W1 vs. W0                         | <a href="#">S47</a> |
|                                                                                                            | 0 mg/ml  | W2 vs. W0                         | <a href="#">S47</a> |
|                                                                                                            | 0 mg/ml  | W4 vs. W0                         | <a href="#">S47</a> |
|                                                                                                            | 0 mg/ml  | W8 vs. W0                         | <a href="#">S47</a> |
|                                                                                                            | 8 mg/ml  | All weeks                         | <a href="#">S47</a> |
|                                                                                                            | 36 mg/ml | All weeks                         | <a href="#">S47</a> |
| <b>Relative to baseline within each condition using per-protocol method unadjusted</b>                     | 8 mg/ml  | All weeks except week 24          | <a href="#">S48</a> |
|                                                                                                            | 36 mg/ml | All weeks                         | <a href="#">S48</a> |
| <b>Relative to baseline within each condition using baseline-carried-forward method unadjusted</b>         | CS       | W1 vs. W0                         | <a href="#">S49</a> |
|                                                                                                            | 0 mg/ml  | W1 vs. W0                         | <a href="#">S49</a> |
|                                                                                                            | 8 mg/ml  | All weeks except week 20, week 24 | <a href="#">S49</a> |
|                                                                                                            | 36 mg/ml | All weeks except week 16          | <a href="#">S49</a> |
| <b>Relative to baseline within each condition using last-observation-carried-forward method unadjusted</b> | CS       | W1 vs. W0                         | <a href="#">S50</a> |
|                                                                                                            | CS       | W4 vs. W0                         | <a href="#">S50</a> |
|                                                                                                            | CS       | W12 vs. W0                        | <a href="#">S50</a> |
|                                                                                                            | 0 mg/ml  | W1 vs. W0                         | <a href="#">S50</a> |
|                                                                                                            | 0 mg/ml  | W2 vs. W0                         | <a href="#">S50</a> |
|                                                                                                            | 0 mg/ml  | W4 vs. W0                         | <a href="#">S50</a> |
|                                                                                                            | 8 mg/ml  | All weeks                         | <a href="#">S50</a> |
|                                                                                                            | 36 mg/ml | All weeks                         | <a href="#">S50</a> |
| <b>Relative to baseline within each condition using multiple imputation method adjusted</b>                | CS       | W4 vs. W0                         | <a href="#">S46</a> |
|                                                                                                            | CS       | W12 vs. W0                        | <a href="#">S46</a> |
|                                                                                                            | 0 mg/ml  | W2 vs. W0                         | <a href="#">S46</a> |
|                                                                                                            | 0 mg/ml  | W4 vs. W0                         | <a href="#">S46</a> |
|                                                                                                            | 8 mg/ml  | All weeks                         | <a href="#">S46</a> |
|                                                                                                            | 36 mg/ml | All weeks                         | <a href="#">S46</a> |

|                                                                                                          |          |                          |                     |
|----------------------------------------------------------------------------------------------------------|----------|--------------------------|---------------------|
| <b>Relative to baseline within each condition using intent-to-treat method adjusted</b>                  | CS       | W1 vs. W0                | <a href="#">S47</a> |
|                                                                                                          | CS       | W4 vs. W0                | <a href="#">S47</a> |
|                                                                                                          | CS       | W12 vs. W0               | <a href="#">S47</a> |
|                                                                                                          | 0 mg/ml  | W1 vs. W0                | <a href="#">S47</a> |
|                                                                                                          | 0 mg/ml  | W2 vs. W0                | <a href="#">S47</a> |
|                                                                                                          | 0 mg/ml  | W4 vs. W0                | <a href="#">S47</a> |
|                                                                                                          | 0 mg/ml  | W8 vs. W0                | <a href="#">S47</a> |
|                                                                                                          | 8 mg/ml  | All weeks                | <a href="#">S47</a> |
|                                                                                                          | 36 mg/ml | All weeks                | <a href="#">S47</a> |
| <b>Relative to baseline within each condition using per-protocol method adjusted</b>                     | 8 mg/ml  | All weeks except week 24 | <a href="#">S48</a> |
|                                                                                                          | 36 mg/ml | All weeks                | <a href="#">S48</a> |
| <b>Relative to baseline within each condition using baseline-carried-forward method adjusted</b>         | CS       | W1 vs. W0                | <a href="#">S49</a> |
|                                                                                                          | 0 mg/ml  | W1 vs. W0                | <a href="#">S49</a> |
|                                                                                                          | 0 mg/ml  | W2 vs. W0                | <a href="#">S49</a> |
|                                                                                                          | 8 mg/ml  | All weeks except week 24 | <a href="#">S49</a> |
|                                                                                                          | 36 mg/ml | All weeks                | <a href="#">S49</a> |
| <b>Relative to baseline within each condition using last-observation-carried-forward method adjusted</b> | CS       | W1 vs. W0                | <a href="#">S50</a> |
|                                                                                                          | CS       | W4 vs. W0                | <a href="#">S50</a> |
|                                                                                                          | CS       | W12 vs. W0               | <a href="#">S50</a> |
|                                                                                                          | CS       | W24 vs. W0               | <a href="#">S50</a> |
|                                                                                                          | 0 mg/ml  | W1 vs. W0                | <a href="#">S50</a> |
|                                                                                                          | 0 mg/ml  | W2 vs. W0                | <a href="#">S50</a> |
|                                                                                                          | 0 mg/ml  | W4 vs. W0                | <a href="#">S50</a> |
|                                                                                                          | 0 mg/ml  | W8 vs. W0                | <a href="#">S50</a> |
|                                                                                                          | 8 mg/ml  | All weeks                | <a href="#">S50</a> |
|                                                                                                          | 36 mg/ml | All weeks                | <a href="#">S50</a> |
| <b>Cigarettes smoked per day</b>                                                                         |          |                          |                     |
| <b>Between conditions at each time point using multiple imputation method unadjusted</b>                 | W1       | CS vs. 36 mg/ml          | <a href="#">S56</a> |
|                                                                                                          | W2       | CS vs. 36 mg/ml          | <a href="#">S56</a> |
|                                                                                                          | W4       | CS vs. 0 mg/ml           | <a href="#">S56</a> |
|                                                                                                          | W4       | CS vs. 8 mg/ml           | <a href="#">S56</a> |
|                                                                                                          | W4       | CS vs. 36 mg/ml          | <a href="#">S56</a> |
|                                                                                                          | W8       | CS vs. 0 mg/ml           | <a href="#">S56</a> |
|                                                                                                          | W8       | CS vs. 36 mg/ml          | <a href="#">S56</a> |
|                                                                                                          | W12      | CS vs. 36 mg/ml          | <a href="#">S56</a> |

|                                                                                      |     |                 |                     |
|--------------------------------------------------------------------------------------|-----|-----------------|---------------------|
|                                                                                      | W16 | CS vs. 0 mg/ml  | <a href="#">S56</a> |
|                                                                                      | W16 | CS vs. 36 mg/ml | <a href="#">S56</a> |
|                                                                                      | W20 | CS vs. 36 mg/ml | <a href="#">S56</a> |
|                                                                                      | W24 | CS vs. 36 mg/ml | <a href="#">S56</a> |
| <b>Between conditions at each time point using intent-to-treat method unadjusted</b> | W1  | CS vs. 36 mg/ml | <a href="#">S57</a> |
|                                                                                      | W2  | CS vs. 8 mg/ml  | <a href="#">S57</a> |
|                                                                                      | W2  | CS vs. 36 mg/ml | <a href="#">S57</a> |
|                                                                                      | W4  | CS vs. 0 mg/ml  | <a href="#">S57</a> |
|                                                                                      | W4  | CS vs. 8 mg/ml  | <a href="#">S57</a> |
|                                                                                      | W4  | CS vs. 36 mg/ml | <a href="#">S57</a> |
|                                                                                      | W8  | CS vs. 0 mg/ml  | <a href="#">S57</a> |
|                                                                                      | W8  | CS vs. 8 mg/ml  | <a href="#">S57</a> |
|                                                                                      | W8  | CS vs. 36 mg/ml | <a href="#">S57</a> |
|                                                                                      | W12 | CS vs. 8 mg/ml  | <a href="#">S57</a> |
|                                                                                      | W12 | CS vs. 36 mg/ml | <a href="#">S57</a> |
|                                                                                      | W16 | CS vs. 0 mg/ml  | <a href="#">S57</a> |
|                                                                                      | W16 | CS vs. 36 mg/ml | <a href="#">S57</a> |
|                                                                                      | W20 | CS vs. 8 mg/ml  | <a href="#">S57</a> |
|                                                                                      | W20 | CS vs. 36 mg/ml | <a href="#">S57</a> |
|                                                                                      | W24 | CS vs. 8 mg/ml  | <a href="#">S57</a> |
|                                                                                      | W24 | CS vs. 36 mg/ml | <a href="#">S57</a> |
| <b>Between conditions at each time point using per-protocol method unadjusted</b>    | W1  | CS vs. 36 mg/ml | <a href="#">S58</a> |
|                                                                                      | W2  | CS vs. 0 mg/ml  | <a href="#">S58</a> |
|                                                                                      | W2  | CS vs. 8 mg/ml  | <a href="#">S58</a> |
|                                                                                      | W2  | CS vs. 36 mg/ml | <a href="#">S58</a> |
|                                                                                      | W4  | CS vs. 0 mg/ml  | <a href="#">S58</a> |
|                                                                                      | W4  | CS vs. 8 mg/ml  | <a href="#">S58</a> |
|                                                                                      | W4  | CS vs. 36 mg/ml | <a href="#">S58</a> |
|                                                                                      | W8  | CS vs. 0 mg/ml  | <a href="#">S58</a> |
|                                                                                      | W8  | CS vs. 8 mg/ml  | <a href="#">S58</a> |
|                                                                                      | W8  | CS vs. 36 mg/ml | <a href="#">S58</a> |
|                                                                                      | W12 | CS vs. 8 mg/ml  | <a href="#">S58</a> |
|                                                                                      | W12 | CS vs. 36 mg/ml | <a href="#">S58</a> |
|                                                                                      | W16 | CS vs. 0 mg/ml  | <a href="#">S58</a> |
|                                                                                      | W16 | CS vs. 36 mg/ml | <a href="#">S58</a> |
|                                                                                      | W20 | CS vs. 8 mg/ml  | <a href="#">S58</a> |

|                                                                                                       |     |                      |                     |
|-------------------------------------------------------------------------------------------------------|-----|----------------------|---------------------|
|                                                                                                       | W20 | CS vs. 36 mg/ml      | <a href="#">S58</a> |
|                                                                                                       | W24 | CS vs. 0 mg/ml       | <a href="#">S58</a> |
|                                                                                                       | W24 | CS vs. 8 mg/ml       | <a href="#">S58</a> |
|                                                                                                       | W24 | CS vs. 36 mg/ml      | <a href="#">S58</a> |
| <b>Between conditions at each time point using baseline-carried-forward method unadjusted</b>         | W1  | CS vs. 36 mg/ml      | <a href="#">S59</a> |
|                                                                                                       | W2  | CS vs. 36 mg/ml      | <a href="#">S59</a> |
|                                                                                                       | W4  | CS vs. 36 mg/ml      | <a href="#">S59</a> |
|                                                                                                       | W8  | CS vs. 36 mg/ml      | <a href="#">S59</a> |
|                                                                                                       | W12 | CS vs. 36 mg/ml      | <a href="#">S59</a> |
|                                                                                                       | W16 | CS vs. 36 mg/ml      | <a href="#">S59</a> |
|                                                                                                       | W20 | 0 mg/ml vs. 36 mg/ml | <a href="#">S59</a> |
| <b>Between conditions at each time point using last-observation-carried-forward method unadjusted</b> | W1  | CS vs. 36 mg/ml      | <a href="#">S60</a> |
|                                                                                                       | W2  | CS vs. 36 mg/ml      | <a href="#">S60</a> |
|                                                                                                       | W4  | CS vs. 8 mg/ml       | <a href="#">S60</a> |
|                                                                                                       | W4  | CS vs. 36 mg/ml      | <a href="#">S60</a> |
|                                                                                                       | W8  | CS vs. 8 mg/ml       | <a href="#">S60</a> |
|                                                                                                       | W8  | CS vs. 36 mg/ml      | <a href="#">S60</a> |
|                                                                                                       | W12 | CS vs. 36 mg/ml      | <a href="#">S60</a> |
|                                                                                                       | W16 | CS vs. 36 mg/ml      | <a href="#">S60</a> |
|                                                                                                       | W20 | CS vs. 36 mg/ml      | <a href="#">S60</a> |
|                                                                                                       | W20 | 0 mg/ml vs. 36 mg/ml | <a href="#">S60</a> |
|                                                                                                       | W24 | CS vs. 36 mg/ml      | <a href="#">S60</a> |
|                                                                                                       | W24 | 0 mg/ml vs. 36 mg/ml | <a href="#">S60</a> |
| <b>Between conditions at each time point using multiple imputation method adjusted</b>                | W1  | CS vs. 0 mg/ml       | <a href="#">S56</a> |
|                                                                                                       | W1  | CS vs. 8 mg/ml       | <a href="#">S56</a> |
|                                                                                                       | W1  | CS vs. 36 mg/ml      | <a href="#">S56</a> |
|                                                                                                       | W2  | CS vs. 0 mg/ml       | <a href="#">S56</a> |
|                                                                                                       | W2  | CS vs. 8 mg/ml       | <a href="#">S56</a> |
|                                                                                                       | W2  | CS vs. 36 mg/ml      | <a href="#">S56</a> |
|                                                                                                       | W4  | CS vs. 0 mg/ml       | <a href="#">S56</a> |
|                                                                                                       | W4  | CS vs. 8 mg/ml       | <a href="#">S56</a> |
|                                                                                                       | W4  | CS vs. 36 mg/ml      | <a href="#">S56</a> |
|                                                                                                       | W8  | CS vs. 0 mg/ml       | <a href="#">S56</a> |
|                                                                                                       | W8  | CS vs. 8 mg/ml       | <a href="#">S56</a> |
|                                                                                                       | W8  | CS vs. 36 mg/ml      | <a href="#">S56</a> |
|                                                                                                       | W12 | CS vs. 0 mg/ml       | <a href="#">S56</a> |

|                                                                                    |     |                 |                     |
|------------------------------------------------------------------------------------|-----|-----------------|---------------------|
|                                                                                    | W12 | CS vs. 36 mg/ml | <a href="#">S56</a> |
|                                                                                    | W16 | CS vs. 0 mg/ml  | <a href="#">S56</a> |
|                                                                                    | W16 | CS vs. 8 mg/ml  | <a href="#">S56</a> |
|                                                                                    | W16 | CS vs. 36 mg/ml | <a href="#">S56</a> |
|                                                                                    | W20 | CS vs. 0 mg/ml  | <a href="#">S56</a> |
|                                                                                    | W20 | CS vs. 8 mg/ml  | <a href="#">S56</a> |
|                                                                                    | W20 | CS vs. 36 mg/ml | <a href="#">S56</a> |
|                                                                                    | W24 | CS vs. 0 mg/ml  | <a href="#">S56</a> |
|                                                                                    | W24 | CS vs. 8 mg/ml  | <a href="#">S56</a> |
|                                                                                    | W24 | CS vs. 36 mg/ml | <a href="#">S56</a> |
| <b>Between conditions at each time point using intent-to-treat method adjusted</b> | W1  | CS vs. 0 mg/ml  | <a href="#">S57</a> |
|                                                                                    | W1  | CS vs. 8 mg/ml  | <a href="#">S57</a> |
|                                                                                    | W1  | CS vs. 36 mg/ml | <a href="#">S57</a> |
|                                                                                    | W2  | CS vs. 0 mg/ml  | <a href="#">S57</a> |
|                                                                                    | W2  | CS vs. 8 mg/ml  | <a href="#">S57</a> |
|                                                                                    | W2  | CS vs. 36 mg/ml | <a href="#">S57</a> |
|                                                                                    | W4  | CS vs. 0 mg/ml  | <a href="#">S57</a> |
|                                                                                    | W4  | CS vs. 8 mg/ml  | <a href="#">S57</a> |
|                                                                                    | W4  | CS vs. 36 mg/ml | <a href="#">S57</a> |
|                                                                                    | W8  | CS vs. 0 mg/ml  | <a href="#">S57</a> |
|                                                                                    | W8  | CS vs. 8 mg/ml  | <a href="#">S57</a> |
|                                                                                    | W8  | CS vs. 36 mg/ml | <a href="#">S57</a> |
|                                                                                    | W12 | CS vs. 0 mg/ml  | <a href="#">S57</a> |
|                                                                                    | W12 | CS vs. 8 mg/ml  | <a href="#">S57</a> |
|                                                                                    | W12 | CS vs. 36 mg/ml | <a href="#">S57</a> |
|                                                                                    | W16 | CS vs. 0 mg/ml  | <a href="#">S57</a> |
|                                                                                    | W16 | CS vs. 8 mg/ml  | <a href="#">S57</a> |
|                                                                                    | W16 | CS vs. 36 mg/ml | <a href="#">S57</a> |
|                                                                                    | W20 | CS vs. 0 mg/ml  | <a href="#">S57</a> |
|                                                                                    | W20 | CS vs. 8 mg/ml  | <a href="#">S57</a> |
|                                                                                    | W20 | CS vs. 36 mg/ml | <a href="#">S57</a> |
|                                                                                    | W24 | CS vs. 0 mg/ml  | <a href="#">S57</a> |
|                                                                                    | W24 | CS vs. 8 mg/ml  | <a href="#">S57</a> |
|                                                                                    | W24 | CS vs. 36 mg/ml | <a href="#">S57</a> |
| <b>Between conditions at each time point using per-protocol method adjusted</b>    | W1  | CS vs. 0 mg/ml  | <a href="#">S58</a> |
|                                                                                    | W1  | CS vs. 8 mg/ml  | <a href="#">S58</a> |

|                                                                                                     |     |                 |                     |
|-----------------------------------------------------------------------------------------------------|-----|-----------------|---------------------|
|                                                                                                     | W1  | CS vs. 36 mg/ml | <a href="#">S58</a> |
|                                                                                                     | W2  | CS vs. 0 mg/ml  | <a href="#">S58</a> |
|                                                                                                     | W2  | CS vs. 8 mg/ml  | <a href="#">S58</a> |
|                                                                                                     | W2  | CS vs. 36 mg/ml | <a href="#">S58</a> |
|                                                                                                     | W4  | CS vs. 0 mg/ml  | <a href="#">S58</a> |
|                                                                                                     | W4  | CS vs. 8 mg/ml  | <a href="#">S58</a> |
|                                                                                                     | W4  | CS vs. 36 mg/ml | <a href="#">S58</a> |
|                                                                                                     | W8  | CS vs. 0 mg/ml  | <a href="#">S58</a> |
|                                                                                                     | W8  | CS vs. 8 mg/ml  | <a href="#">S58</a> |
|                                                                                                     | W8  | CS vs. 36 mg/ml | <a href="#">S58</a> |
|                                                                                                     | W12 | CS vs. 0 mg/ml  | <a href="#">S58</a> |
|                                                                                                     | W12 | CS vs. 8 mg/ml  | <a href="#">S58</a> |
|                                                                                                     | W12 | CS vs. 36 mg/ml | <a href="#">S58</a> |
|                                                                                                     | W16 | CS vs. 0 mg/ml  | <a href="#">S58</a> |
|                                                                                                     | W16 | CS vs. 36 mg/ml | <a href="#">S58</a> |
|                                                                                                     | W20 | CS vs. 0 mg/ml  | <a href="#">S58</a> |
|                                                                                                     | W20 | CS vs. 8 mg/ml  | <a href="#">S58</a> |
|                                                                                                     | W20 | CS vs. 36 mg/ml | <a href="#">S58</a> |
|                                                                                                     | W24 | CS vs. 0 mg/ml  | <a href="#">S58</a> |
|                                                                                                     | W24 | CS vs. 8 mg/ml  | <a href="#">S58</a> |
|                                                                                                     | W24 | CS vs. 36 mg/ml | <a href="#">S58</a> |
| <b>Between conditions at each time point using baseline-carried-forward method adjusted</b>         | W1  | CS vs. 8 mg/ml  | <a href="#">S59</a> |
|                                                                                                     | W1  | CS vs. 36 mg/ml | <a href="#">S59</a> |
|                                                                                                     | W2  | CS vs. 0 mg/ml  | <a href="#">S59</a> |
|                                                                                                     | W2  | CS vs. 8 mg/ml  | <a href="#">S59</a> |
|                                                                                                     | W2  | CS vs. 36 mg/ml | <a href="#">S59</a> |
|                                                                                                     | W4  | CS vs. 0 mg/ml  | <a href="#">S59</a> |
|                                                                                                     | W4  | CS vs. 8 mg/ml  | <a href="#">S59</a> |
|                                                                                                     | W4  | CS vs. 36 mg/ml | <a href="#">S59</a> |
|                                                                                                     | W8  | CS vs. 0 mg/ml  | <a href="#">S59</a> |
|                                                                                                     | W8  | CS vs. 8 mg/ml  | <a href="#">S59</a> |
|                                                                                                     | W8  | CS vs. 36 mg/ml | <a href="#">S59</a> |
|                                                                                                     | W12 | CS vs. 36 mg/ml | <a href="#">S59</a> |
|                                                                                                     | W16 | CS vs. 36 mg/ml | <a href="#">S59</a> |
| <b>Between conditions at each time point using last-observation-carried-forward method adjusted</b> | W1  | CS vs. 8 mg/ml  | <a href="#">S60</a> |
|                                                                                                     | W1  | CS vs. 36 mg/ml | <a href="#">S60</a> |

|                                                                                                    |          |                      |                     |
|----------------------------------------------------------------------------------------------------|----------|----------------------|---------------------|
|                                                                                                    | W2       | CS vs. 0 mg/ml       | <a href="#">S60</a> |
|                                                                                                    | W2       | CS vs. 8 mg/ml       | <a href="#">S60</a> |
|                                                                                                    | W2       | CS vs. 36 mg/ml      | <a href="#">S60</a> |
|                                                                                                    | W4       | CS vs. 0 mg/ml       | <a href="#">S60</a> |
|                                                                                                    | W4       | CS vs. 8 mg/ml       | <a href="#">S60</a> |
|                                                                                                    | W4       | CS vs. 36 mg/ml      | <a href="#">S60</a> |
|                                                                                                    | W8       | CS vs. 0 mg/ml       | <a href="#">S60</a> |
|                                                                                                    | W8       | CS vs. 8 mg/ml       | <a href="#">S60</a> |
|                                                                                                    | W8       | CS vs. 36 mg/ml      | <a href="#">S60</a> |
|                                                                                                    | W12      | CS vs. 8 mg/ml       | <a href="#">S60</a> |
|                                                                                                    | W12      | CS vs. 36 mg/ml      | <a href="#">S60</a> |
|                                                                                                    | W16      | CS vs. 0 mg/ml       | <a href="#">S60</a> |
|                                                                                                    | W16      | CS vs. 8 mg/ml       | <a href="#">S60</a> |
|                                                                                                    | W16      | CS vs. 36 mg/ml      | <a href="#">S60</a> |
|                                                                                                    | W20      | CS vs. 8 mg/ml       | <a href="#">S60</a> |
|                                                                                                    | W20      | CS vs. 36 mg/ml      | <a href="#">S60</a> |
|                                                                                                    | W20      | 0 mg/ml vs. 36 mg/ml | <a href="#">S60</a> |
|                                                                                                    | W24      | CS vs. 8 mg/ml       | <a href="#">S60</a> |
|                                                                                                    | W24      | CS vs. 36 mg/ml      | <a href="#">S60</a> |
| <b>Relative to baseline within each condition using multiple imputation method unadjusted</b>      | CS       | All weeks            | <a href="#">S61</a> |
|                                                                                                    | 0 mg/ml  | All weeks            | <a href="#">S61</a> |
|                                                                                                    | 8 mg/ml  | All weeks            | <a href="#">S61</a> |
|                                                                                                    | 36 mg/ml | All weeks            | <a href="#">S61</a> |
| <b>Relative to baseline within each condition using intent-to-treat method unadjusted</b>          | CS       | All weeks            | <a href="#">S62</a> |
|                                                                                                    | 0 mg/ml  | All weeks            | <a href="#">S62</a> |
|                                                                                                    | 8 mg/ml  | All weeks            | <a href="#">S62</a> |
|                                                                                                    | 36 mg/ml | All weeks            | <a href="#">S62</a> |
| <b>Relative to baseline within each condition using per-protocol method unadjusted</b>             | CS       | All weeks            | <a href="#">S63</a> |
|                                                                                                    | 0 mg/ml  | All weeks            | <a href="#">S63</a> |
|                                                                                                    | 8 mg/ml  | All weeks            | <a href="#">S63</a> |
|                                                                                                    | 36 mg/ml | All weeks            | <a href="#">S63</a> |
| <b>Relative to baseline within each condition using baseline-carried-forward method unadjusted</b> | CS       | All weeks            | <a href="#">S64</a> |
|                                                                                                    | 0 mg/ml  | All weeks            | <a href="#">S64</a> |
|                                                                                                    | 8 mg/ml  | All weeks            | <a href="#">S64</a> |
|                                                                                                    | 36 mg/ml | All weeks            | <a href="#">S64</a> |

|                                                                                                                   |                     |                      |                     |
|-------------------------------------------------------------------------------------------------------------------|---------------------|----------------------|---------------------|
| <b>Relative to baseline within each condition using last-observation-carried-forward method unadjusted</b>        | CS                  | All weeks            | <a href="#">S65</a> |
|                                                                                                                   | 0 mg/ml             | All weeks            | <a href="#">S65</a> |
|                                                                                                                   | 8 mg/ml             | All weeks            | <a href="#">S65</a> |
|                                                                                                                   | 36 mg/ml            | All weeks            | <a href="#">S65</a> |
| <b>Relative to baseline within each condition using multiple imputation method adjusted</b>                       | CS                  | All weeks            | <a href="#">S61</a> |
|                                                                                                                   | 0 mg/ml             | All weeks            | <a href="#">S61</a> |
|                                                                                                                   | 8 mg/ml             | All weeks            | <a href="#">S61</a> |
|                                                                                                                   | 36 mg/ml            | All weeks            | <a href="#">S61</a> |
| <b>Relative to baseline within each condition using intent-to-treat method adjusted</b>                           | CS                  | All weeks            | <a href="#">S62</a> |
|                                                                                                                   | 0 mg/ml             | All weeks            | <a href="#">S62</a> |
|                                                                                                                   | 8 mg/ml             | All weeks            | <a href="#">S62</a> |
|                                                                                                                   | 36 mg/ml            | All weeks            | <a href="#">S62</a> |
| <b>Relative to baseline within each condition using per-protocol method adjusted</b>                              | CS                  | All weeks            | <a href="#">S63</a> |
|                                                                                                                   | 0 mg/ml             | All weeks            | <a href="#">S63</a> |
|                                                                                                                   | 8 mg/ml             | All weeks            | <a href="#">S63</a> |
|                                                                                                                   | 36 mg/ml            | All weeks            | <a href="#">S63</a> |
| <b>Relative to baseline within each condition using baseline-carried-forward method adjusted</b>                  | CS                  | All weeks            | <a href="#">S64</a> |
|                                                                                                                   | 0 mg/ml             | All weeks            | <a href="#">S64</a> |
|                                                                                                                   | 8 mg/ml             | All weeks            | <a href="#">S64</a> |
|                                                                                                                   | 36 mg/ml            | All weeks            | <a href="#">S64</a> |
| <b>Relative to baseline within each condition using last-observation-carried-forward method adjusted</b>          | CS                  | All weeks            | <a href="#">S65</a> |
|                                                                                                                   | 0 mg/ml             | All weeks            | <a href="#">S65</a> |
|                                                                                                                   | 8 mg/ml             | All weeks            | <a href="#">S65</a> |
|                                                                                                                   | 36 mg/ml            | All weeks            | <a href="#">S65</a> |
| <b>Study product use</b>                                                                                          |                     |                      |                     |
| <b>Between conditions at each time point using intent-to-treat method with assumption of no use to missing</b>    | W16                 | CS vs. 36 mg/ml      | <a href="#">S69</a> |
|                                                                                                                   | W4                  | 0 mg/ml vs. 36 mg/ml | <a href="#">S69</a> |
| <b>Between conditions at each time point using intent-to-treat method without assumption of no use to missing</b> | W8                  | CS vs. 0 mg/ml       | <a href="#">S70</a> |
|                                                                                                                   | W16                 | CS vs. 0 mg/ml       | <a href="#">S70</a> |
|                                                                                                                   | W8                  | CS vs. 8 mg/ml       | <a href="#">S70</a> |
|                                                                                                                   | W12                 | CS vs. 8 mg/ml       | <a href="#">S70</a> |
|                                                                                                                   | W16                 | CS vs. 8 mg/ml       | <a href="#">S70</a> |
|                                                                                                                   | All weeks except W1 | CS vs. 36 mg/ml      | <a href="#">S70</a> |
| <b>Between conditions at each time point using per-protocol method</b>                                            | W4                  | CS vs. 0 mg/ml       | <a href="#">S71</a> |



|                                                                                                                   |                     |                             |                     |
|-------------------------------------------------------------------------------------------------------------------|---------------------|-----------------------------|---------------------|
|                                                                                                                   | W8                  | CS vs. 0 mg/ml              | <a href="#">S71</a> |
|                                                                                                                   | W16                 | CS vs. 0 mg/ml              | <a href="#">S71</a> |
|                                                                                                                   | W8                  | CS vs. 8 mg/ml              | <a href="#">S71</a> |
|                                                                                                                   | W12                 | CS vs. 8 mg/ml              | <a href="#">S71</a> |
|                                                                                                                   | W16                 | CS vs. 8 mg/ml              | <a href="#">S71</a> |
|                                                                                                                   | All weeks except W1 | CS vs. 36 mg/ml             | <a href="#">S71</a> |
| <b>Relative to week 1 within each condition using intent-to-treat method with assumption of no use to missing</b> | CS                  | All weeks except W2         | <a href="#">S72</a> |
|                                                                                                                   | 0 mg/ml             | All weeks except W2         | <a href="#">S72</a> |
|                                                                                                                   | 8 mg/ml             | All weeks except W2, W4     | <a href="#">S72</a> |
|                                                                                                                   | 36 mg/ml            | All weeks except W2, W4     | <a href="#">S72</a> |
| <b>Relative to week 1 within each condition using intent-to-treat method with assumption of no use to missing</b> | CS                  | All weeks except W2         | <a href="#">S73</a> |
|                                                                                                                   | 0 mg/ml             | All weeks except W2         | <a href="#">S73</a> |
|                                                                                                                   | 8 mg/ml             | All weeks except W2         | <a href="#">S73</a> |
|                                                                                                                   | 36 mg/ml            | All weeks except W2, W4     | <a href="#">S73</a> |
| <b>Relative to week 1 within each condition using per-protocol method</b>                                         | CS                  | All weeks except W2         | <a href="#">S74</a> |
|                                                                                                                   | 0 mg/ml             | All weeks except W2, W4, W8 | <a href="#">S74</a> |
|                                                                                                                   | 8 mg/ml             | All weeks except W2, W4     | <a href="#">S74</a> |
|                                                                                                                   | 36 mg/ml            | W12 vs. W1                  | <a href="#">S74</a> |
|                                                                                                                   | 36 mg/ml            | W20 vs. W1                  | <a href="#">S74</a> |
|                                                                                                                   | 36 mg/ml            | W24 vs. W1                  | <a href="#">S74</a> |

Abbreviation: W, week; CS, cigarette substitute.

\*Analysis is controlled for the condition or the visit.

**Table S6. Estimated urinary total NNAL standardized by creatinine in unadjusted and adjusted mixed models using multiple imputation method**

| NNAL, pg/mg creatinine* | Unadjusted Model |                            |         |                            |         |                            |          |                            |
|-------------------------|------------------|----------------------------|---------|----------------------------|---------|----------------------------|----------|----------------------------|
|                         | CS               |                            | 0 mg/ml |                            | 8 mg/ml |                            | 36 mg/ml |                            |
| Condition               | N                | Estimates<br>(95% CI)      | N       | Estimates<br>(95% CI)      | N       | Estimates<br>(95% CI)      | N        | Estimates<br>(95% CI)      |
| Week 0                  | 130              | 377.38<br>(296.91, 482.5)  | 130     | 416.47<br>(326.89, 533.79) | 130     | 397.24<br>(312.15, 508.54) | 130      | 389.13<br>(305.93, 497.90) |
| Week 4                  | 130              | 352.14<br>(276.18, 451.71) | 130     | 399.70<br>(308.01, 522.31) | 130     | 336.05<br>(264.03, 430.26) | 130      | 293.71<br>(230.91, 375.79) |
| Week 12                 | 130              | 316.46<br>(245.66, 410.38) | 130     | 347.22<br>(255.55, 476.37) | 130     | 342.09<br>(265.39, 443.88) | 130      | 238.96<br>(188.35, 304.93) |
| Week 24                 | 130              | 346.09<br>(265.00, 455.32) | 130     | 332.43<br>(254.31, 437.78) | 130     | 271.21<br>(196.99, 377.36) | 130      | 210.80<br>(163.03, 274.42) |
|                         | Adjusted Model   |                            |         |                            |         |                            |          |                            |
| Week 0                  | 130              | 357.01<br>(291.52, 439.05) | 130     | 358.52<br>(291.68, 442.59) | 130     | 356.84<br>(290.63, 440.03) | 130      | 356.43<br>(290.37, 439.41) |
| Week 4                  | 130              | 333.25<br>(269.99, 413.21) | 130     | 344.29<br>(277.47, 429.24) | 130     | 302.41<br>(246.36, 372.81) | 130      | 269.68<br>(218.36, 334.59) |
| Week 12                 | 130              | 299.67<br>(241.39, 373.79) | 130     | 299.71<br>(232.67, 388.62) | 130     | 307.79<br>(246.35, 386.51) | 130      | 219.79<br>(180.51, 268.69) |
| Week 24                 | 130              | 327.56<br>(256.19, 421.41) | 130     | 287.13<br>(226.09, 366.79) | 130     | 244.60<br>(181.88, 331.94) | 130      | 194.09<br>(152.36, 248.74) |

Note: NNAL, 4-(methylnitrosamino)-1-(3-pyridyl)-1-butanol; CS, cigarette substitute; CI, confidence interval. The adjusted model included the following covariates: site, gender, age, race/ethnicity, week 0 cigarettes smoked per day, week 0 forced expiratory volume in one second, and week 0 urinary total NNAL (pg/mg creatinine-transformed).

\* Estimates with 95% confidence intervals were obtained via back-transformation to the original scale following Box-Cox transformation and multiple imputation.

**Table S7. Estimated urinary total NNAL standardized by creatinine in unadjusted and adjusted mixed models using intent-to-treat method**

| NNAL, pg/mg creatinine* | Unadjusted Model |                            |         |                            |         |                            |          |                            |
|-------------------------|------------------|----------------------------|---------|----------------------------|---------|----------------------------|----------|----------------------------|
|                         | CS               |                            | 0 mg/ml |                            | 8 mg/ml |                            | 36 mg/ml |                            |
| Condition               | N                | Estimates<br>(95% CI)      | N       | Estimates<br>(95% CI)      | N       | Estimates<br>(95% CI)      | N        | Estimates<br>(95% CI)      |
| Week 0                  | 130              | 377.38<br>(297.40, 481.66) | 130     | 416.47<br>(327.44, 532.85) | 130     | 397.24<br>(312.67, 507.65) | 130      | 389.13<br>(306.44, 497.03) |
| Week 4                  | 115              | 350.75<br>(274.02, 451.79) | 96      | 424.22<br>(324.17, 559.30) | 110     | 319.86<br>(249.44, 412.76) | 111      | 295.09<br>(230.81, 379.61) |
| Week 12                 | 92               | 326.01<br>(249.32, 429.45) | 77      | 368.19<br>(274.06, 499.11) | 85      | 346.58<br>(262.34, 461.55) | 93       | 253.31<br>(194.96, 331.46) |
| Week 24                 | 90               | 342.76<br>(259.53, 456.31) | 69      | 344.97<br>(252.03, 477.01) | 73      | 255.78<br>(190.65, 346.22) | 79       | 233.04<br>(175.83, 311.4)  |
|                         | Adjusted Model   |                            |         |                            |         |                            |          |                            |
| Week 0                  | 130              | 358.22<br>(292.32, 440.83) | 130     | 360.37<br>(293.06, 445.09) | 130     | 356.00<br>(289.39, 439.87) | 130      | 358.74<br>(292.23, 442.28) |
| Week 4                  | 115              | 329.87<br>(267.28, 408.96) | 96      | 370.36<br>(293.95, 469.20) | 110     | 299.70<br>(241.6, 373.54)  | 111      | 272.03<br>(219.97, 337.97) |
| Week 12                 | 92               | 304.14<br>(242.18, 383.98) | 77      | 319.41<br>(248.29, 413.58) | 85      | 325.44<br>(255.64, 416.78) | 93       | 226.21<br>(180.64, 284.74) |
| Week 24                 | 90               | 329.08<br>(260.68, 417.73) | 69      | 309.62<br>(237.43, 406.70) | 73      | 250.17<br>(194.46, 323.94) | 79       | 196.37<br>(154.47, 251.11) |

Note: NNAL, 4-(methylnitrosamino)-1-(3-pyridyl)-1-butanol; CS, cigarette substitute; CI, confidence interval. The adjusted model included the following covariates: site, gender, age, race/ethnicity, week 0 cigarettes smoked per day, week 0 forced expiratory volume in one second, and week 0 urinary total NNAL (pg/mg creatinine-transformed).

\* Estimates with 95% confidence intervals were obtained via back-transformation to the original scale following Box-Cox transformation.

**Table S8. Estimated urinary total NNAL standardized by creatinine in unadjusted and adjusted mixed models using per-protocol method**

| NNAL, pg/mg creatinine* | Unadjusted Model |                            |         |                            |         |                            |          |                            |  |
|-------------------------|------------------|----------------------------|---------|----------------------------|---------|----------------------------|----------|----------------------------|--|
|                         | CS               |                            | 0 mg/ml |                            | 8 mg/ml |                            | 36 mg/ml |                            |  |
| Condition               | N                | Estimates<br>(95% CI)      | N       | Estimates<br>(95% CI)      | N       | Estimates<br>(95% CI)      | N        | Estimates<br>(95% CI)      |  |
| Week 0                  | 85               | 379·67<br>(284·88, 510·32) | 67      | 361·69<br>(262·27, 504·15) | 66      | 359·26<br>(259·94, 501·92) | 77       | 471·70<br>(346·63, 648·22) |  |
| Week 4                  | 85               | 348·06<br>(261·80, 466·61) | 67      | 375·23<br>(271·77, 523·67) | 66      | 275·11<br>(200·73, 380·93) | 77       | 337·99<br>(250·85, 459·58) |  |
| Week 12                 | 85               | 342·09<br>(257·44, 458·38) | 67      | 316·66<br>(230·58, 439·41) | 66      | 334·78<br>(242·77, 466·60) | 77       | 253·84<br>(189·97, 342·13) |  |
| Week 24                 | 85               | 359·89<br>(270·45, 482·96) | 67      | 321·11<br>(233·72, 445·80) | 66      | 251·06<br>(183·71, 346·59) | 77       | 239·78<br>(179·74, 322·63) |  |
|                         |                  |                            |         | Adjusted Model             |         |                            |          |                            |  |
| Week 0                  | 85               | 338·14<br>(260·59, 441·84) | 67      | 319·58<br>(237·92, 433·14) | 66      | 327·97<br>(244·80, 443·28) | 77       | 361·87<br>(272·23, 485·05) |  |
| Week 4                  | 85               | 310·29<br>(239·66, 404·51) | 67      | 331·39<br>(246·45, 449·65) | 66      | 259·06<br>(194·67, 347·65) | 77       | 261·52<br>(198·52, 347·23) |  |
| Week 12                 | 85               | 305·03<br>(235·70, 397·47) | 67      | 280·25<br>(209·43, 378·30) | 66      | 309·49<br>(231·39, 417·56) | 77       | 197·82<br>(151·29, 260·58) |  |
| Week 24                 | 85               | 320·72<br>(247·50, 418·48) | 67      | 284·14<br>(212·25, 383·72) | 66      | 231·38<br>(174·42, 309·48) | 77       | 187·13<br>(143·32, 246·11) |  |

Note: NNAL, 4-(methylnitrosamino)-1-(3-pyridyl)-1-butanol; CS, cigarette substitute; CI, confidence interval. The adjusted model included the following covariates: site, gender, age, race/ethnicity, week 0 cigarettes smoked per day, week 0 forced expiratory volume in one second, and week 0 urinary total NNAL (pg/mg creatinine-transformed). Sample size included participants who have available urinary total NNAL at week 0, 4, 12 and 24, which is N=85, 67, 66 and 77 for CS, 0 mg/ml, 8 mg/ml and 36 mg/ml, respectively.

\* Estimates with 95% confidence intervals were obtained via back-transformation to the original scale following Box-Cox transformation.

**Table S9. Estimated urinary total NNAL standardized by creatinine in unadjusted and adjusted mixed models using baseline-carried-forward method**

| NNAL, pg/mg creatinine* | Unadjusted Model |                            |         |                            |         |                            |          |                            |
|-------------------------|------------------|----------------------------|---------|----------------------------|---------|----------------------------|----------|----------------------------|
|                         | CS               |                            | 0 mg/ml |                            | 8 mg/ml |                            | 36 mg/ml |                            |
| Condition               | N                | Estimates (95% CI)         | N       | Estimates (95% CI)         | N       | Estimates (95% CI)         | N        | Estimates (95% CI)         |
| Week 0                  | 130              | 377.38<br>(297.73, 481.10) | 130     | 416.47<br>(327.80, 532.22) | 130     | 397.24<br>(313.02, 507.06) | 130      | 389.13<br>(306.78, 496.46) |
| Week 4                  | 130              | 346.29<br>(273.75, 440.54) | 130     | 427.53<br>(336.31, 546.73) | 130     | 340.38<br>(269.18, 432.83) | 130      | 306.32<br>(242.84, 388.54) |
| Week 12                 | 130              | 331.46<br>(262.29, 421.22) | 130     | 387.44<br>(305.48, 494.25) | 130     | 371.52<br>(293.22, 473.45) | 130      | 271.00<br>(215.44, 342.72) |
| Week 24                 | 130              | 360.57<br>(284.77, 459.15) | 130     | 392.68<br>(309.51, 501.10) | 130     | 330.25<br>(261.35, 419.64) | 130      | 254.30<br>(202.45, 321.12) |
|                         | Adjusted Model   |                            |         |                            |         |                            |          |                            |
| Week 0                  | 130              | 367.94<br>(307.16, 442.21) | 130     | 369.15<br>(307.39, 444.84) | 130     | 365.96<br>(304.64, 441.14) | 130      | 369.14<br>(307.64, 444.43) |
| Week 4                  | 130              | 337.70<br>(282.35, 405.23) | 130     | 378.84<br>(315.31, 456.74) | 130     | 318.57<br>(265.85, 383.01) | 130      | 290.95<br>(243.51, 348.75) |
| Week 12                 | 130              | 323.27<br>(270.49, 387.60) | 130     | 343.72<br>(286.58, 413.64) | 130     | 344.40<br>(287.00, 414.67) | 130      | 257.56<br>(216.02, 308.04) |
| Week 24                 | 130              | 351.59<br>(293.75, 422.20) | 130     | 348.31<br>(290.34, 419.27) | 130     | 305.69<br>(255.30, 367.25) | 130      | 241.76<br>(203.00, 288.83) |

Note: NNAL, 4-(methylnitrosamino)-1-(3-pyridyl)-1-butanol; CS, cigarette substitute; CI, confidence interval. The adjusted model included the following covariates: site, gender, age, race/ethnicity, week 0 cigarettes smoked per day, week 0 forced expiratory volume in one second, and week 0 urinary total NNAL (pg/mg creatinine-transformed).

\* Estimates with 95% confidence intervals were obtained via back-transformation to the original scale following Box-Cox transformation.

**Table S10. Estimated urinary total NNAL standardized by creatinine in unadjusted and adjusted mixed models using last-observation-carried-forward method**

| NNAL, pg/mg creatinine* | Unadjusted Model |                            |         |                            |         |                            |          |                            |
|-------------------------|------------------|----------------------------|---------|----------------------------|---------|----------------------------|----------|----------------------------|
|                         | CS               |                            | 0 mg/ml |                            | 8 mg/ml |                            | 36 mg/ml |                            |
| Condition               | N                | Estimates<br>(95% CI)      | N       | Estimates<br>(95% CI)      | N       | Estimates<br>(95% CI)      | N        | Estimates<br>(95% CI)      |
| <b>Week 0</b>           | 130              | 377.38<br>(297.94, 480.75) | 130     | 416.47<br>(328.03, 531.84) | 130     | 397.24<br>(313.24, 506.69) | 130      | 389.13<br>(306.99, 496.09) |
| <b>Week 4</b>           | 130              | 346.29<br>(273.94, 440.23) | 130     | 427.53<br>(336.54, 546.32) | 130     | 340.38<br>(269.37, 432.52) | 130      | 306.32<br>(243.00, 388.26) |
| <b>Week 12</b>          | 130              | 326.88<br>(258.93, 414.97) | 130     | 408.92<br>(322.23, 521.96) | 130     | 369.69<br>(292.01, 470.72) | 130      | 263.43<br>(209.70, 332.70) |
| <b>Week 24</b>          | 130              | 325.48<br>(257.85, 413.15) | 130     | 409.15<br>(322.40, 522.26) | 130     | 310.51<br>(246.25, 393.69) | 130      | 253.31<br>(201.82, 319.62) |
|                         | Adjusted Model   |                            |         |                            |         |                            |          |                            |
| <b>Week 0</b>           | 130              | 372.93<br>(307.03, 454.73) | 130     | 376.22<br>(308.72, 460.32) | 130     | 371.80<br>(305.06, 454.95) | 130      | 373.50<br>(306.85, 456.40) |
| <b>Week 4</b>           | 130              | 342.25<br>(282.23, 416.60) | 130     | 386.12<br>(316.68, 472.67) | 130     | 323.58<br>(266.22, 394.83) | 130      | 294.30<br>(242.90, 357.91) |
| <b>Week 12</b>          | 130              | 323.08<br>(266.72, 392.82) | 130     | 369.47<br>(303.29, 451.89) | 130     | 348.12<br>(286.00, 425.40) | 130      | 253.24<br>(209.61, 307.08) |
| <b>Week 24</b>          | 130              | 321.70<br>(265.61, 391.11) | 130     | 369.68<br>(303.46, 452.15) | 130     | 291.76<br>(240.51, 355.27) | 130      | 243.55<br>(201.73, 295.10) |

Note: NNAL, 4-(methylnitrosamino)-1-(3-pyridyl)-1-butanol; CS, cigarette substitute; CI, confidence interval. The adjusted model included the following covariates: site, gender, age, race/ethnicity, week 0 cigarettes smoked per day, week 0 forced expiratory volume in one second, and week 0 urinary total NNAL (pg/mg creatinine-transformed).

\* Estimates with 95% confidence intervals were obtained via back-transformation to the original scale following Box-Cox transformation.

**Table S11. P-values for pairwise comparisons between conditions at each time point for urinary total NNAL standardized by creatinine using multiple imputation method**

| <b>Unadjusted Model*</b> |                   |         |         |          |
|--------------------------|-------------------|---------|---------|----------|
| <b>Week 0</b>            |                   |         |         |          |
|                          | CS                | 0 mg/ml | 8 mg/ml | 36 mg/ml |
| CS                       | ..                |         |         |          |
| 0 mg/ml                  | 0.58              | ..      |         |          |
| 8 mg/ml                  | 0.77              | 0.79    | ..      |          |
| 36 mg/ml                 | 0.86              | 0.70    | 0.91    | ..       |
| <b>Week 4</b>            |                   |         |         |          |
| CS                       | ..                |         |         |          |
| 0 mg/ml                  | 0.50              | ..      |         |          |
| 8 mg/ml                  | 0.79              | 0.34    | ..      |          |
| 36 mg/ml                 | 0.30              | 0.09    | 0.44    | ..       |
| <b>Week 12</b>           |                   |         |         |          |
| CS                       | ..                |         |         |          |
| 0 mg/ml                  | 0.63              | ..      |         |          |
| 8 mg/ml                  | 0.68              | 0.94    | ..      |          |
| 36 mg/ml                 | 0.11              | 0.04    | 0.05    | ..       |
| <b>Week 24</b>           |                   |         |         |          |
| CS                       | ..                |         |         |          |
| 0 mg/ml                  | 0.83              | ..      |         |          |
| 8 mg/ml                  | 0.24              | 0.35    | ..      |          |
| 36 mg/ml                 | 0.01 <sup>s</sup> | 0.03    | 0.26    | ..       |
| <b>Adjusted Model*</b>   |                   |         |         |          |
| <b>Week 0</b>            |                   |         |         |          |
|                          | CS                | 0 mg/ml | 8 mg/ml | 36 mg/ml |
| CS                       | ..                |         |         |          |
| 0 mg/ml                  | 0.98              | ..      |         |          |
| 8 mg/ml                  | 1.00              | 0.97    | ..      |          |
| 36 mg/ml                 | 0.99              | 0.97    | 0.99    | ..       |
| <b>Week 4</b>            |                   |         |         |          |
| CS                       | ..                |         |         |          |
| 0 mg/ml                  | 0.83              | ..      |         |          |
| 8 mg/ml                  | 0.49              | 0.36    | ..      |          |
| 36 mg/ml                 | 0.13              | 0.09    | 0.41    | ..       |
| <b>Week 12</b>           |                   |         |         |          |
| CS                       | ..                |         |         |          |
| 0 mg/ml                  | 1.00              | ..      |         |          |
| 8 mg/ml                  | 0.86              | 0.88    | ..      |          |

|                 |        |      |      |    |
|-----------------|--------|------|------|----|
| <b>36 mg/ml</b> | 0.02   | 0.04 | 0.03 | .. |
| <b>Week 24</b>  |        |      |      |    |
| <b>CS</b>       | ..     |      |      |    |
| <b>0 mg/ml</b>  | 0.40   | ..   |      |    |
| <b>8 mg/ml</b>  | 0.10   | 0.40 | ..   |    |
| <b>36 mg/ml</b> | 0.0004 | 0.03 | 0.24 | .. |

Note: NNAL, 4-(methylnitrosamino)-1-(3-pyridyl)-1-butanol; CS, cigarette substitute. The adjusted model included the following covariates: site, gender, age, race/ethnicity, week 0 cigarettes smoked per day, week 0 forced expiratory volume in one second, and week 0 urinary total NNAL (pg/mg creatinine-transformed).

\* Bonferroni correction  $\alpha=0.008$ , between all conditions.

S Significant difference at week 24 between CS and 36 mg/ml conditions in unadjusted model with  $p=0.006$ .



**Table S12. P-values for pairwise comparisons between conditions at each time point for urinary total NNAL standardized by creatinine using intent-to-treat method**

| <b>Unadjusted Model*</b> |      |         |         |          |
|--------------------------|------|---------|---------|----------|
| <b>Week 0</b>            |      |         |         |          |
|                          | CS   | 0 mg/ml | 8 mg/ml | 36 mg/ml |
| CS                       | ..   |         |         |          |
| 0 mg/ml                  | 0.57 | ..      |         |          |
| 8 mg/ml                  | 0.77 | 0.79    | ..      |          |
| 36 mg/ml                 | 0.86 | 0.70    | 0.91    | ..       |
| <b>Week 4</b>            |      |         |         |          |
| CS                       | ..   |         |         |          |
| 0 mg/ml                  | 0.31 | ..      |         |          |
| 8 mg/ml                  | 0.61 | 0.14    | ..      |          |
| 36 mg/ml                 | 0.34 | 0.05    | 0.66    | ..       |
| <b>Week 12</b>           |      |         |         |          |
| CS                       | ..   |         |         |          |
| 0 mg/ml                  | 0.56 | ..      |         |          |
| 8 mg/ml                  | 0.76 | 0.77    | ..      |          |
| 36 mg/ml                 | 0.19 | 0.07    | 0.11    | ..       |
| <b>Week 24</b>           |      |         |         |          |
| CS                       | ..   |         |         |          |
| 0 mg/ml                  | 0.98 | ..      |         |          |
| 8 mg/ml                  | 0.16 | 0.18    | ..      |          |
| 36 mg/ml                 | 0.06 | 0.07    | 0.66    | ..       |
| <b>Adjusted Model*</b>   |      |         |         |          |
| <b>Week 0</b>            |      |         |         |          |
|                          | CS   | 0 mg/ml | 8 mg/ml | 36 mg/ml |
| CS                       | ..   |         |         |          |
| 0 mg/ml                  | 0.96 | ..      |         |          |
| 8 mg/ml                  | 0.96 | 0.93    | ..      |          |
| 36 mg/ml                 | 0.99 | 0.97    | 0.96    | ..       |
| <b>Week 4</b>            |      |         |         |          |
| CS                       | ..   |         |         |          |
| 0 mg/ml                  | 0.44 | ..      |         |          |
| 8 mg/ml                  | 0.50 | 0.16    | ..      |          |
| 36 mg/ml                 | 0.17 | 0.04    | 0.50    | ..       |
| <b>Week 12</b>           |      |         |         |          |
| CS                       | ..   |         |         |          |
| 0 mg/ml                  | 0.77 | ..      |         |          |

|                 |       |      |      |    |
|-----------------|-------|------|------|----|
| <b>8 mg/ml</b>  | 0.67  | 0.91 | ..   |    |
| <b>36 mg/ml</b> | 0.05  | 0.03 | 0.02 | .. |
| <b>Week 24</b>  |       |      |      |    |
| <b>CS</b>       | ..    |      |      |    |
| <b>0 mg/ml</b>  | 0.72  | ..   |      |    |
| <b>8 mg/ml</b>  | 0.10  | 0.23 | ..   |    |
| <b>36 mg/ml</b> | 0.001 | 0.01 | 0.15 | .. |

Note: NNAL, 4-(methylnitrosamino)-1-(3-pyridyl)-1-butanol; CS, cigarette substitute. The adjusted model included the following covariates: site, gender, age, race/ethnicity, week 0 cigarettes smoked per day, week 0 forced expiratory volume in one second, and week 0 urinary total NNAL (pg/mg creatinine-transformed).

\* Bonferroni correction  $\alpha=0.008$ , between all conditions.

**Table S13. P-values for pairwise comparisons between conditions at each time point for urinary total NNAL standardized by creatinine using per-protocol method**

| <b>Unadjusted Model*</b> |      |         |         |          |
|--------------------------|------|---------|---------|----------|
| <b>Week 0</b>            |      |         |         |          |
|                          | CS   | 0 mg/ml | 8 mg/ml | 36 mg/ml |
| CS                       | ..   |         |         |          |
| 0 mg/ml                  | 0.83 | ..      |         |          |
| 8 mg/ml                  | 0.81 | 0.98    | ..      |          |
| 36 mg/ml                 | 0.32 | 0.25    | 0.24    | ..       |
| <b>Week 4</b>            |      |         |         |          |
| CS                       | ..   |         |         |          |
| 0 mg/ml                  | 0.74 | ..      |         |          |
| 8 mg/ml                  | 0.29 | 0.18    | ..      |          |
| 36 mg/ml                 | 0.89 | 0.65    | 0.36    | ..       |
| <b>Week 12</b>           |      |         |         |          |
| CS                       | ..   |         |         |          |
| 0 mg/ml                  | 0.73 | ..      |         |          |
| 8 mg/ml                  | 0.92 | 0.81    | ..      |          |
| 36 mg/ml                 | 0.16 | 0.32    | 0.22    | ..       |
| <b>Week 24</b>           |      |         |         |          |
| CS                       | ..   |         |         |          |
| 0 mg/ml                  | 0.61 | ..      |         |          |
| 8 mg/ml                  | 0.10 | 0.29    | ..      |          |
| 36 mg/ml                 | 0.05 | 0.19    | 0.83    | ..       |
| <b>Adjusted Model*</b>   |      |         |         |          |
| <b>Week 0</b>            |      |         |         |          |
|                          | CS   | 0 mg/ml | 8 mg/ml | 36 mg/ml |
| CS                       | ..   |         |         |          |
| 0 mg/ml                  | 0.76 | ..      |         |          |
| 8 mg/ml                  | 0.87 | 0.89    | ..      |          |
| 36 mg/ml                 | 0.70 | 0.51    | 0.60    | ..       |
| <b>Week 4</b>            |      |         |         |          |
| CS                       | ..   |         |         |          |
| 0 mg/ml                  | 0.72 | ..      |         |          |
| 8 mg/ml                  | 0.32 | 0.20    | ..      |          |
| 36 mg/ml                 | 0.33 | 0.20    | 0.96    | ..       |
| <b>Week 12</b>           |      |         |         |          |
| CS                       | ..   |         |         |          |
| 0 mg/ml                  | 0.64 | ..      |         |          |
| 8 mg/ml                  | 0.94 | 0.61    | ..      |          |

|                 |       |      |      |    |
|-----------------|-------|------|------|----|
| <b>36 mg/ml</b> | 0·01  | 0·05 | 0·02 | ·· |
| <b>Week 24</b>  |       |      |      |    |
| <b>CS</b>       | ··    |      |      |    |
| <b>0 mg/ml</b>  | 0·50  | ··   |      |    |
| <b>8 mg/ml</b>  | 0·07  | 0·28 | ··   |    |
| <b>36 mg/ml</b> | 0·002 | 0·02 | 0·24 | ·· |

Note: NNAL, 4-(methylnitrosamino)-1-(3-pyridyl)-1-butanol; CS, cigarette substitute. The adjusted model included the following covariates: site, gender, age, race/ethnicity, week 0 cigarettes smoked per day, week 0 forced expiratory volume in one second, and week 0 urinary total NNAL (pg/mg creatinine-transformed).

\* Bonferroni correction  $\alpha=0\cdot008$ , between all conditions.

**Table S14. P-values for pairwise comparisons between conditions at each time point for urinary total NNAL standardized by creatinine using baseline-carried-forward method**

| <b>Unadjusted Model*</b> |           |                |                |                 |
|--------------------------|-----------|----------------|----------------|-----------------|
| <b>Week 0</b>            |           |                |                |                 |
|                          | <b>CS</b> | <b>0 mg/ml</b> | <b>8 mg/ml</b> | <b>36 mg/ml</b> |
| <b>CS</b>                | ..        |                |                |                 |
| <b>0 mg/ml</b>           | 0.57      | ..             |                |                 |
| <b>8 mg/ml</b>           | 0.77      | 0.79           | ..             |                 |
| <b>36 mg/ml</b>          | 0.86      | 0.70           | 0.91           | ..              |
| <b>Week 4</b>            |           |                |                |                 |
| <b>CS</b>                | ..        |                |                |                 |
| <b>0 mg/ml</b>           | 0.22      | ..             |                |                 |
| <b>8 mg/ml</b>           | 0.92      | 0.19           | ..             |                 |
| <b>36 mg/ml</b>          | 0.47      | 0.05           | 0.54           | ..              |
| <b>Week 12</b>           |           |                |                |                 |
| <b>CS</b>                | ..        |                |                |                 |
| <b>0 mg/ml</b>           | 0.36      | ..             |                |                 |
| <b>8 mg/ml</b>           | 0.51      | 0.81           | ..             |                 |
| <b>36 mg/ml</b>          | 0.23      | 0.04           | 0.06           | ..              |
| <b>Week 24</b>           |           |                |                |                 |
| <b>CS</b>                | ..        |                |                |                 |
| <b>0 mg/ml</b>           | 0.62      | ..             |                |                 |
| <b>8 mg/ml</b>           | 0.61      | 0.32           | ..             |                 |
| <b>36 mg/ml</b>          | 0.04      | 0.01           | 0.12           | ..              |
| <b>Adjusted Model*</b>   |           |                |                |                 |
| <b>Week 0</b>            |           |                |                |                 |
|                          | <b>CS</b> | <b>0 mg/ml</b> | <b>8 mg/ml</b> | <b>36 mg/ml</b> |
| <b>CS</b>                | ..        |                |                |                 |
| <b>0 mg/ml</b>           | 0.98      | ..             |                |                 |
| <b>8 mg/ml</b>           | 0.96      | 0.94           | ..             |                 |
| <b>36 mg/ml</b>          | 0.98      | 1.00           | 0.94           | ..              |
| <b>Week 4</b>            |           |                |                |                 |
| <b>CS</b>                | ..        |                |                |                 |
| <b>0 mg/ml</b>           | 0.34      | ..             |                |                 |
| <b>8 mg/ml</b>           | 0.63      | 0.15           | ..             |                 |
| <b>36 mg/ml</b>          | 0.22      | 0.03           | 0.45           | ..              |
| <b>Week 12</b>           |           |                |                |                 |
| <b>CS</b>                | ..        |                |                |                 |
| <b>0 mg/ml</b>           | 0.61      | ..             |                |                 |
| <b>8 mg/ml</b>           | 0.60      | 0.99           | ..             |                 |

|                 |       |       |      |    |
|-----------------|-------|-------|------|----|
| <b>36 mg/ml</b> | 0·06  | 0·02  | 0·02 | .. |
| <b>Week 24</b>  |       |       |      |    |
| <b>CS</b>       | ..    |       |      |    |
| <b>0 mg/ml</b>  | 0·94  | ..    |      |    |
| <b>8 mg/ml</b>  | 0·25  | 0·28  | ..   |    |
| <b>36 mg/ml</b> | 0·002 | 0·002 | 0·05 | .. |

Note: NNAL, 4-(methylnitrosamino)-1-(3-pyridyl)-1-butanol; CS, cigarette substitute. The adjusted model included the following covariates: site, gender, age, race/ethnicity, week 0 cigarettes smoked per day, week 0 forced expiratory volume in one second, and week 0 urinary total NNAL (pg/mg creatinine-transformed).

\* Bonferroni correction alpha=0.008, between all conditions.

**Table S15. P-values for pairwise comparisons between conditions at each time point for urinary total NNAL standardized by creatinine using last-observation-carried-forward method**

| Unadjusted Model* |      |                   |         |          |
|-------------------|------|-------------------|---------|----------|
| Week 0            |      |                   |         |          |
|                   | CS   | 0 mg/ml           | 8 mg/ml | 36 mg/ml |
| CS                | ..   |                   |         |          |
| 0 mg/ml           | 0.57 | ..                |         |          |
| 8 mg/ml           | 0.77 | 0.79              | ..      |          |
| 36 mg/ml          | 0.86 | 0.70              | 0.91    | ..       |
| Week 4            |      |                   |         |          |
| CS                | ..   |                   |         |          |
| 0 mg/ml           | 0.22 | ..                |         |          |
| 8 mg/ml           | 0.92 | 0.19              | ..      |          |
| 36 mg/ml          | 0.47 | 0.05              | 0.54    | ..       |
| Week 12           |      |                   |         |          |
| CS                | ..   |                   |         |          |
| 0 mg/ml           | 0.19 | ..                |         |          |
| 8 mg/ml           | 0.47 | 0.56              | ..      |          |
| 36 mg/ml          | 0.20 | 0.01              | 0.05    | ..       |
| Week 24           |      |                   |         |          |
| CS                | ..   |                   |         |          |
| 0 mg/ml           | 0.18 | ..                |         |          |
| 8 mg/ml           | 0.78 | 0.11              | ..      |          |
| 36 mg/ml          | 0.14 | 0.01 <sup>s</sup> | 0.22    | ..       |
| Adjusted Model*   |      |                   |         |          |
| Week 0            |      |                   |         |          |
|                   | CS   | 0 mg/ml           | 8 mg/ml | 36 mg/ml |
| CS                | ..   |                   |         |          |
| 0 mg/ml           | 0.95 | ..                |         |          |
| 8 mg/ml           | 0.98 | 0.93              | ..      |          |
| 36 mg/ml          | 0.99 | 0.96              | 0.97    | ..       |
| Week 4            |      |                   |         |          |
| CS                | ..   |                   |         |          |
| 0 mg/ml           | 0.35 | ..                |         |          |
| 8 mg/ml           | 0.66 | 0.17              | ..      |          |
| 36 mg/ml          | 0.24 | 0.04              | 0.46    | ..       |
| Week 12           |      |                   |         |          |
| CS                | ..   |                   |         |          |
| 0 mg/ml           | 0.30 | ..                |         |          |
| 8 mg/ml           | 0.56 | 0.65              | ..      |          |

|                 |      |       |      |    |
|-----------------|------|-------|------|----|
| <b>36 mg/ml</b> | 0.05 | 0.003 | 0.01 | .. |
| <b>Week 24</b>  |      |       |      |    |
| <b>CS</b>       | ..   |       |      |    |
| <b>0 mg/ml</b>  | 0.28 | ..    |      |    |
| <b>8 mg/ml</b>  | 0.44 | 0.07  | ..   |    |
| <b>36 mg/ml</b> | 0.03 | 0.001 | 0.15 | .. |

Note: NNAL, 4-(methylnitrosamino)-1-(3-pyridyl)-1-butanol; CS, cigarette substitute. The adjusted model included the following covariates: site, gender, age, race/ethnicity, week 0 cigarettes smoked per day, week 0 forced expiratory volume in one second, and week 0 urinary total NNAL (pg/mg creatinine-transformed).

\* Bonferroni correction  $\alpha=0.008$ , between all conditions.

S Significant difference at week 24 between 0 mg/ml and 36 mg/ml conditions in unadjusted model with  $p=0.005$ , comparing to Bonferroni correction  $\alpha=0.008$ .



**Table S16. P-values for pairwise comparisons relative to baseline within each condition for urinary total NNAL standardized by creatinine using multiple imputation method**

| Unadjusted Model* |      |         |         |          |
|-------------------|------|---------|---------|----------|
|                   | CS   | 0 mg/ml | 8 mg/ml | 36 mg/ml |
| <b>Week 4</b>     | 0.58 | 0.76    | 0.18    | 0.03     |
| <b>Week 12</b>    | 0.27 | 0.33    | 0.35    | 0.001    |
| <b>Week 24</b>    | 0.62 | 0.20    | 0.06    | 0.0005   |
| Adjusted Model*   |      |         |         |          |
|                   | CS   | 0 mg/ml | 8 mg/ml | 36 mg/ml |
| <b>Week 4</b>     | 0.57 | 0.76    | 0.17    | 0.02     |
| <b>Week 12</b>    | 0.21 | 0.29    | 0.29    | 0.0003   |
| <b>Week 24</b>    | 0.56 | 0.14    | 0.04    | <0.0001  |

Note: NNAL, 4-(methylnitrosamino)-1-(3-pyridyl)-1-butanol; CS, cigarette substitute. The adjusted model included the following covariates: site, gender, age, race/ethnicity, week 0 cigarettes smoked per day, week 0 forced expiratory volume in one second, and week 0 urinary total NNAL (pg/mg creatinine-transformed).

\* Bonferroni correction  $\alpha=0.017$ , relative to baseline (week 0).

**Table S17. P-values for pairwise comparisons relative to baseline within each condition for urinary total NNAL standardized by creatinine using intent-to-treat method**

| <b>Unadjusted Model*</b> |           |                |                |                 |
|--------------------------|-----------|----------------|----------------|-----------------|
|                          | <b>CS</b> | <b>0 mg/ml</b> | <b>8 mg/ml</b> | <b>36 mg/ml</b> |
| <b>Week 4</b>            | 0.55      | 0.89           | 0.08           | 0.03            |
| <b>Week 12</b>           | 0.36      | 0.48           | 0.41           | 0.01            |
| <b>Week 24</b>           | 0.59      | 0.33           | 0.02           | 0.004           |
| <b>Adjusted Model*</b>   |           |                |                |                 |
|                          | <b>CS</b> | <b>0 mg/ml</b> | <b>8 mg/ml</b> | <b>36 mg/ml</b> |
| <b>Week 4</b>            | 0.48      | 0.83           | 0.15           | 0.02            |
| <b>Week 12</b>           | 0.25      | 0.42           | 0.54           | 0.0009          |
| <b>Week 24</b>           | 0.56      | 0.34           | 0.02           | <0.0001         |

Note: NNAL, 4-(methylnitrosamino)-1-(3-pyridyl)-1-butanol; CS, cigarette substitute. The adjusted model included the following covariates: site, gender, age, race/ethnicity, week 0 cigarettes smoked per day, week 0 forced expiratory volume in one second, and week 0 urinary total NNAL (pg/mg creatinine-transformed).

\* Bonferroni correction  $\alpha=0.017$ , relative to baseline (week 0).

**Table S18. P-values for pairwise comparisons relative to baseline within each condition for urinary total NNAL standardized by creatinine using per-protocol method**

| <b>Unadjusted Model*</b> |           |                |                |                 |
|--------------------------|-----------|----------------|----------------|-----------------|
|                          | <b>CS</b> | <b>0 mg/ml</b> | <b>8 mg/ml</b> | <b>36 mg/ml</b> |
| <b>Week 4</b>            | 0.53      | 0.81           | 0.09           | 0.02            |
| <b>Week 12</b>           | 0.55      | 0.49           | 0.72           | 0.0007          |
| <b>Week 24</b>           | 0.78      | 0.58           | 0.09           | 0.0007          |
| <b>Adjusted Model*</b>   |           |                |                |                 |
|                          | <b>CS</b> | <b>0 mg/ml</b> | <b>8 mg/ml</b> | <b>36 mg/ml</b> |
| <b>Week 4</b>            | 0.53      | 0.81           | 0.13           | 0.02            |
| <b>Week 12</b>           | 0.52      | 0.46           | 0.75           | 0.0002          |
| <b>Week 24</b>           | 0.75      | 0.53           | 0.06           | 0.0001          |

Note: NNAL, 4-(methylnitrosamino)-1-(3-pyridyl)-1-butanol; CS, cigarette substitute. The adjusted model included the following covariates: site, gender, age, race/ethnicity, week 0 cigarettes smoked per day, week 0 forced expiratory volume in one second, and week 0 urinary total NNAL (pg/mg creatinine-transformed).

\* Bonferroni correction alpha=0.017, relative to baseline (week 0).

**Table S19. P-values for pairwise comparisons relative to baseline within each condition for urinary total NNAL standardized by creatinine using baseline-carried-forward method**

| <b>Unadjusted Model*</b> |           |                |                |                 |
|--------------------------|-----------|----------------|----------------|-----------------|
|                          | <b>CS</b> | <b>0 mg/ml</b> | <b>8 mg/ml</b> | <b>36 mg/ml</b> |
| <b>Week 4</b>            | 0.41      | 0.81           | 0.14           | 0.02            |
| <b>Week 12</b>           | 0.33      | 0.59           | 0.62           | 0.01            |
| <b>Week 24</b>           | 0.76      | 0.70           | 0.22           | 0.004           |
| <b>Adjusted Model*</b>   |           |                |                |                 |
|                          | <b>CS</b> | <b>0 mg/ml</b> | <b>8 mg/ml</b> | <b>36 mg/ml</b> |
| <b>Week 4</b>            | 0.40      | 0.80           | 0.18           | 0.02            |
| <b>Week 12</b>           | 0.26      | 0.54           | 0.60           | 0.002           |
| <b>Week 24</b>           | 0.70      | 0.63           | 0.13           | 0.0003          |

Note: NNAL, 4-(methylnitrosamino)-1-(3-pyridyl)-1-butanol; CS, cigarette substitute. The adjusted model included the following covariates: site, gender, age, race/ethnicity, week 0 cigarettes smoked per day, week 0 forced expiratory volume in one second, and week 0 urinary total NNAL (pg/mg creatinine-transformed).

\* Bonferroni correction  $\alpha=0.017$ , relative to baseline (week 0).

**Table S20. P-values for pairwise comparisons relative to baseline within each condition for urinary total NNAL standardized by creatinine using last-observation-carried-forward method**

| <b>Unadjusted Model*</b> |           |                |                |                   |
|--------------------------|-----------|----------------|----------------|-------------------|
|                          | <b>CS</b> | <b>0 mg/ml</b> | <b>8 mg/ml</b> | <b>36 mg/ml</b>   |
| <b>Week 4</b>            | 0.39      | 0.79           | 0.12           | 0.02 <sup>S</sup> |
| <b>Week 12</b>           | 0.26      | 0.89           | 0.58           | 0.002             |
| <b>Week 24</b>           | 0.30      | 0.90           | 0.09           | 0.003             |
| <b>Adjusted Model*</b>   |           |                |                |                   |
|                          | <b>CS</b> | <b>0 mg/ml</b> | <b>8 mg/ml</b> | <b>36 mg/ml</b>   |
| <b>Week 4</b>            | 0.38      | 0.79           | 0.16           | 0.01              |
| <b>Week 12</b>           | 0.22      | 0.88           | 0.58           | 0.0007            |
| <b>Week 24</b>           | 0.23      | 0.89           | 0.05           | 0.0005            |

Note: NNAL, 4-(methylnitrosamino)-1-(3-pyridyl)-1-butanol; CS, cigarette substitute. The adjusted model included the following covariates: site, gender, age, race/ethnicity, week 0 cigarettes smoked per day, week 0 forced expiratory volume in one second, and week 0 urinary total NNAL (pg/mg creatinine-transformed).

\* Bonferroni correction  $\alpha=0.017$ , relative to baseline (week 0).

S Significant difference between week 4 and week 0 in 36 mg/ml condition for unadjusted model,  $p\text{-value}=0.015$ , comparing to Bonferroni correction  $\alpha=0.017$ .

**Table S21. Estimated urinary cotinine standardized by creatinine in unadjusted and adjusted mixed models using multiple imputation method**

| Cotinine, ng/mg creatinine* | Unadjusted Model |                               |         |                               |         |                               |          |                               |
|-----------------------------|------------------|-------------------------------|---------|-------------------------------|---------|-------------------------------|----------|-------------------------------|
|                             | CS               |                               | 0 mg/ml |                               | 8 mg/ml |                               | 36 mg/ml |                               |
| Condition                   | N                | Estimates<br>(95% CI)         | N       | Estimates<br>(95% CI)         | N       | Estimates<br>(95% CI)         | N        | Estimates<br>(95% CI)         |
| Week 0                      | 130              | 1441.56<br>(1186.10, 1752.03) | 130     | 1444.53<br>(1188.55, 1755.65) | 130     | 1729.53<br>(1423.04, 2102.03) | 130      | 1658.74<br>(1364.80, 2015.99) |
| Week 4                      | 130              | 1384.71<br>(1131.96, 1693.90) | 130     | 1290.74<br>(1053.1, 1582.02)  | 130     | 1279.92<br>(1045.16, 1567.42) | 130      | 1696.03<br>(1375.86, 2090.70) |
| Week 12                     | 130              | 1073.87<br>(872.92, 1321.08)  | 130     | 1266.75<br>(1020.85, 1571.88) | 130     | 1092.94<br>(876.82, 1362.31)  | 130      | 1313.39<br>(1051.80, 1640.03) |
| Week 24                     | 130              | 1128.08<br>(904.59, 1406.79)  | 130     | 1235.99<br>(935.55, 1632.91)  | 130     | 1157.95<br>(910.95, 1471.93)  | 130      | 1472.99<br>(1206.13, 1798.90) |
|                             | Adjusted Model   |                               |         |                               |         |                               |          |                               |
| Week 0                      | 130              | 1499.24<br>(1246.04, 1803.89) | 130     | 1465.65<br>(1213.31, 1770.48) | 130     | 1601.43<br>(1327.57, 1931.79) | 130      | 1589.17<br>(1318.30, 1915.70) |
| Week 4                      | 130              | 1440.12<br>(1201.22, 1726.53) | 130     | 1309.62<br>(1072.56, 1599.07) | 130     | 1185.13<br>(985.38, 1425.37)  | 130      | 1624.90<br>(1305.91, 2021.80) |
| Week 12                     | 130              | 1116.84<br>(911.15, 1368.96)  | 130     | 1285.27<br>(1027.49, 1607.72) | 130     | 1011.99<br>(825.35, 1240.83)  | 130      | 1258.30<br>(1012.00, 1564.55) |
| Week 24                     | 130              | 1173.22<br>(960.36, 1433.26)  | 130     | 1254.06<br>(966.87, 1626.54)  | 130     | 1072.19<br>(867.98, 1324.45)  | 130      | 1411.21<br>(1167.77, 1705.39) |

Note: CS, cigarette substitute; CI, confidence interval. The adjusted model included the following covariates: site, gender, age, race/ethnicity, week 0 urinary cotinine (ng/mg creatinine-transformed), education level, week 0 environmental smoke score, week 0 partial INTERHEART non-laboratory score, week 0 forced expiratory volume in one second, week 0 forced vital capacity, and week 0 Penn State Cigarette Dependence Index score.

\* Estimates with 95% confidence intervals were obtained via back-transformation to the original scale following Box-Cox transformation and multiple imputation.

**Table S22. Estimated urinary cotinine standardized by creatinine in unadjusted and adjusted mixed models using intent-to-treat method**

| Cotinine, ng/mg creatinine* | Unadjusted Model |                               |         |                               |         |                               |          |                               |  |
|-----------------------------|------------------|-------------------------------|---------|-------------------------------|---------|-------------------------------|----------|-------------------------------|--|
|                             | CS               |                               | 0 mg/ml |                               | 8 mg/ml |                               | 36 mg/ml |                               |  |
| Condition                   | N                | Estimates<br>(95% CI)         | N       | Estimates<br>(95% CI)         | N       | Estimates<br>(95% CI)         | N        | Estimated Mean<br>(95% CI)    |  |
| Week 0                      | 130              | 1441.56<br>(1186.96, 1750.77) | 130     | 1444.53<br>(1189.41, 1754.38) | 130     | 1729.53<br>(1424.07, 2100.51) | 130      | 1658.74<br>(1365.79, 2014.54) |  |
| Week 4                      | 115              | 1393.72<br>(1136.93, 1708.51) | 96      | 1281.77<br>(1029.82, 1595.37) | 110     | 1251.12<br>(1016.94, 1539.22) | 111      | 1742.55<br>(1417.63, 2141.95) |  |
| Week 12                     | 92               | 1071.05<br>(856.10, 1339.96)  | 77      | 1313.44<br>(1028.71, 1676.97) | 85      | 1060.89<br>(841.53, 1337.42)  | 93       | 1388.93<br>(1110.17, 1737.70) |  |
| Week 24                     | 90               | 1134.96<br>(901.20, 1429.37)  | 69      | 1160.71<br>(893.92, 1507.14)  | 73      | 1049.47<br>(815.68, 1350.27)  | 79       | 1516.06<br>(1188.54, 1933.84) |  |
|                             |                  |                               |         | <b>Adjusted Model</b>         |         |                               |          |                               |  |
| Week 0                      | 130              | 1529.53<br>(1263.16, 1852.07) | 130     | 1485.39<br>(1214.60, 1816.55) | 130     | 1661.48<br>(1361.10, 2028.15) | 130      | 1616.43<br>(1328.34, 1966.99) |  |
| Week 4                      | 115              | 1502.24<br>(1229.96, 1834.80) | 96      | 1282.43<br>(1026.92, 1601.52) | 110     | 1184.99<br>(959.11, 1464.07)  | 111      | 1717.15<br>(1398.89, 2107.83) |  |
| Week 12                     | 92               | 1127.26<br>(907.33, 1400.50)  | 77      | 1255.50<br>(982.35, 1604.60)  | 85      | 1049.20<br>(828.37, 1328.9)   | 93       | 1344.97<br>(1078.18, 1677.77) |  |
| Week 24                     | 90               | 1227.72<br>(984.09, 1531.68)  | 69      | 1115.03<br>(859.67, 1446.23)  | 73      | 1010.55<br>(782.97, 1304.28)  | 79       | 1387.57<br>(1092.64, 1762.11) |  |

Note: CS, cigarette substitute; CI, confidence interval. The adjusted model included the following covariates: site, gender, age, race/ethnicity, week 0 urinary cotinine (ng/mg creatinine-transformed), education level, week 0 environmental smoke score, week 0 partial INTERHEART non-laboratory score, week 0 forced expiratory volume in one second, week 0 forced vital capacity, and week 0 Penn State Cigarette Dependence Index score.

\* Estimates with 95% confidence intervals were obtained via back-transformation to the original scale following Box-Cox transformation and multiple imputation.

**Table S23. Estimated urinary cotinine standardized by creatinine in unadjusted and adjusted mixed models using per-protocol method**

| Cotinine, ng/mg creatinine* | Unadjusted Model |                               |         |                               |         |                               |          |                               |
|-----------------------------|------------------|-------------------------------|---------|-------------------------------|---------|-------------------------------|----------|-------------------------------|
|                             | CS               |                               | 0 mg/ml |                               | 8 mg/ml |                               | 36 mg/ml |                               |
| Condition                   | N                | Estimates (95% CI)            | N       | Estimates (95% CI)            | N       | Estimates (95% CI)            | N        | Estimates (95% CI)            |
| Week 0                      | 85               | 1470·86<br>(1141·94, 1894·53) | 67      | 1334·90<br>(1003·76, 1775·28) | 66      | 1604·61<br>(1203·97, 2138·57) | 77       | 1817·95<br>(1393·43, 2371·82) |
| Week 4                      | 85               | 1413·46<br>(1097·37, 1820·59) | 67      | 1146·69<br>(862·24, 1524·98)  | 66      | 1190·03<br>(892·91, 1586·03)  | 77       | 1861·07<br>(1426·47, 2428·07) |
| Week 12                     | 85               | 1082·83<br>(840·68, 1394·72)  | 67      | 1190·56<br>(895·23, 1583·32)  | 66      | 1022·50<br>(767·20, 1362·75)  | 77       | 1472·28<br>(1128·47, 1920·83) |
| Week 24                     | 85               | 1152·62<br>(894·87, 1484·62)  | 67      | 1112·04<br>(836·19, 1478·90)  | 66      | 1011·77<br>(759·15, 1348·45)  | 77       | 1559·63<br>(1195·42, 2034·79) |
|                             | Adjusted Model   |                               |         |                               |         |                               |          |                               |
| Week 0                      | 85               | 1536·03<br>(1173·34, 2010·84) | 67      | 1439·00<br>(1055·21, 1962·39) | 66      | 1693·35<br>(1238·30, 2315·61) | 77       | 1717·75<br>(1285·84, 2294·75) |
| Week 4                      | 85               | 1478·97<br>(1129·75, 1936·14) | 67      | 1179·08<br>(864·61, 1607·92)  | 66      | 1213·71<br>(887·55, 1659·72)  | 77       | 1785·17<br>(1336·31, 2384·81) |
| Week 12                     | 85               | 1130·50<br>(863·56, 1479·95)  | 67      | 1174·38<br>(861·16, 1601·52)  | 66      | 1112·99<br>(813·90, 1521·99)  | 77       | 1385·30<br>(1036·98, 1850·62) |
| Week 24                     | 85               | 1219·00<br>(931·17, 1595·81)  | 67      | 1071·96<br>(786·06, 1461·85)  | 66      | 985·59<br>(720·74, 1347·77)   | 77       | 1407·94<br>(1053·93, 1880·87) |

Note: CS, cigarette substitute; CI, confidence interval. The adjusted model included the following covariates: site, gender, age, race/ethnicity, week 0 urinary cotinine (ng/mg creatinine-transformed), education level, week 0 environmental smoke score, week 0 partial INTERHEART non-laboratory score, week 0 forced expiratory volume in one second, week 0 forced vital capacity, and week 0 Penn State Cigarette Dependence Index score. Sample size included participants who have available urinary cotinine at week 0, 4, 12 and 24, which is N=85, 67, 66 and 77 for CS, 0 mg/ml, 8 mg/ml and 36 mg/ml, respectively.

\* Estimates with 95% confidence intervals were obtained via back-transformation to the original scale following Box-Cox transformation and multiple imputation.



**Table S24. Estimated urinary cotinine standardized by creatinine in unadjusted and adjusted mixed models using baseline-carried-forward method**

| Cotinine, ng/mg creatinine* | Unadjusted Model |                               |         |                               |         |                               |          |                               |
|-----------------------------|------------------|-------------------------------|---------|-------------------------------|---------|-------------------------------|----------|-------------------------------|
|                             | CS               |                               | 0 mg/ml |                               | 8 mg/ml |                               | 36 mg/ml |                               |
| Condition                   | N                | Estimates<br>(95% CI)         | N       | Estimates<br>(95% CI)         | N       | Estimates<br>(95% CI)         | N        | Estimates<br>(95% CI)         |
| Week 0                      | 130              | 1441·56<br>(1195·26, 1738·61) | 130     | 1444·53<br>(1197·72, 1742·2)  | 130     | 1729·53<br>(1434·03, 2085·92) | 130      | 1658·74<br>(1375·34, 2000·55) |
| Week 4                      | 130              | 1401·16<br>(1161·77, 1689·89) | 130     | 1305·99<br>(1082·85, 1575·10) | 130     | 1321·16<br>(1095·43, 1593·40) | 130      | 1707·43<br>(1415·70, 2059·26) |
| Week 12                     | 130              | 1147·16<br>(951·16, 1383·54)  | 130     | 1331·27<br>(1103·82, 1605·60) | 130     | 1268·79<br>(1052·01, 1530·24) | 130      | 1413·43<br>(1171·94, 1704·69) |
| Week 24                     | 130              | 1226·91<br>(1017·28, 1479·73) | 130     | 1311·50<br>(1087·43, 1581·76) | 130     | 1362·23<br>(1129·48, 1642·93) | 130      | 1518·93<br>(1259·41, 1831·93) |
|                             | Adjusted Model   |                               |         |                               |         |                               |          |                               |
| Week 0                      | 130              | 1521·17<br>(1284·69, 1801·17) | 130     | 1484·15<br>(1242·92, 1772·21) | 130     | 1620·63<br>(1359·07, 1932·53) | 130      | 1593·01<br>(1339·56, 1894·41) |
| Week 4                      | 130              | 1492·57<br>(1260·54, 1767·31) | 130     | 1327·73<br>(1111·92, 1585·42) | 130     | 1212·99<br>(1017·22, 1446·43) | 130      | 1668·30<br>(1402·88, 1983·95) |
| Week 12                     | 130              | 1210·39<br>(1022·23, 1433·19) | 130     | 1322·03<br>(1107·15, 1578·61) | 130     | 1204·19<br>(1009·84, 1435·94) | 130      | 1372·06<br>(1153·77, 1631·66) |
| Week 24                     | 130              | 1307·15<br>(1103·95, 1547·76) | 130     | 1273·64<br>(1066·62, 1520·83) | 130     | 1247·33<br>(1046·01, 1487·38) | 130      | 1418·98<br>(1193·22, 1687·45) |

Note: CS, cigarette substitute; CI, confidence interval. The adjusted model included the following covariates: site, gender, age, race/ethnicity, week 0 urinary cotinine (ng/mg creatinine-transformed), education level, week 0 environmental smoke score, week 0 partial INTERHEART non-laboratory score, week 0 forced expiratory volume in one second, week 0 forced vital capacity, and week 0 Penn State Cigarette Dependence Index score.

\* Estimates with 95% confidence intervals were obtained via back-transformation to the original scale following Box-Cox transformation and multiple imputation.

**Table S25. Estimated urinary cotinine standardized by creatinine in unadjusted and adjusted mixed models using last-observation-carried-forward method**

| Cotinine, ng/mg creatinine* | Unadjusted Model |                               |     |                               |     |                               |     |                               |  |
|-----------------------------|------------------|-------------------------------|-----|-------------------------------|-----|-------------------------------|-----|-------------------------------|--|
|                             | Condition        | CS                            |     | 0 mg/ml                       |     | 8 mg/ml                       |     | 36 mg/ml                      |  |
| Week                        | N                | Estimates<br>(95% CI)         | N   | Estimates<br>(95% CI)         | N   | Estimates<br>(95% CI)         | N   | Estimates<br>(95% CI)         |  |
| Week 0                      | 130              | 1441.56<br>(1194.16, 1740.21) | 130 | 1444.53<br>(1196.63, 1743.79) | 130 | 1729.53<br>(1432.71, 2087.83) | 130 | 1658.74<br>(1374.08, 2002.38) |  |
| Week 4                      | 130              | 1401.16<br>(1160.70, 1691.44) | 130 | 1305.99<br>(1081.86, 1576.55) | 130 | 1321.16<br>(1094.43, 1594.86) | 130 | 1707.43<br>(1414.41, 2061.15) |  |
| Week 12                     | 130              | 1143.42<br>(947.19, 1380.30)  | 130 | 1343.97<br>(1113.32, 1622.40) | 130 | 1173.91<br>(972.44, 1417.10)  | 130 | 1422.59<br>(1178.45, 1717.31) |  |
| Week 24                     | 130              | 1181.58<br>(978.80, 1426.36)  | 130 | 1302.10<br>(1078.64, 1571.86) | 130 | 1154.63<br>(956.48, 1393.83)  | 130 | 1474.60<br>(1221.53, 1780.09) |  |
|                             |                  | Adjusted Model                |     |                               |     |                               |     |                               |  |
| Week 0                      | 130              | 1516.94<br>(1268.82, 1813.59) | 130 | 1474.78<br>(1222.33, 1779.36) | 130 | 1642.33<br>(1363.41, 1978.32) | 130 | 1595.93<br>(1328.43, 1917.3)  |  |
| Week 4                      | 130              | 1488.43<br>(1244.97, 1779.5)  | 130 | 1319.34<br>(1093.50, 1591.81) | 130 | 1229.23<br>(1020.46, 1480.70) | 130 | 1671.36<br>(1391.22, 2007.92) |  |
| Week 12                     | 130              | 1212.61<br>(1014.26, 1449.74) | 130 | 1334.72<br>(1106.25, 1610.37) | 130 | 1116.24<br>(926.66, 1344.59)  | 130 | 1384.31<br>(1152.28, 1663.06) |  |
| Week 24                     | 130              | 1262.43<br>(1055.94, 1509.31) | 130 | 1275.75<br>(1057.37, 1539.22) | 130 | 1055.46<br>(876.20, 1271.38)  | 130 | 1400.47<br>(1165.73, 1682.48) |  |

Note: CS, cigarette substitute; CI, confidence interval. The adjusted model included the following covariates: site, gender, age, race/ethnicity, week 0 urinary cotinine (ng/mg creatinine-transformed), education level, week 0 environmental smoke score, week 0 partial INTERHEART non-laboratory score, week 0 forced expiratory volume in one second, week 0 forced vital capacity, and week 0 Penn State Cigarette Dependence Index score.

\* Estimates with 95% confidence intervals were obtained via back-transformation to the original scale following Box-Cox transformation and multiple imputation.

**Table S26. P-values for pairwise comparisons between conditions at each time point for urinary cotinine standardized by creatinine using multiple imputation method**

| <b>Unadjusted Model*</b> |           |                |                |                 |
|--------------------------|-----------|----------------|----------------|-----------------|
| <b>Week 0</b>            |           |                |                |                 |
|                          | <b>CS</b> | <b>0 mg/ml</b> | <b>8 mg/ml</b> | <b>36 mg/ml</b> |
| <b>CS</b>                | ..        |                |                |                 |
| <b>0 mg/ml</b>           | 0.99      | ..             |                |                 |
| <b>8 mg/ml</b>           | 0.20      | 0.20           | ..             |                 |
| <b>36 mg/ml</b>          | 0.32      | 0.33           | 0.77           | ..              |
| <b>Week 4</b>            |           |                |                |                 |
| <b>CS</b>                | ..        |                |                |                 |
| <b>0 mg/ml</b>           | 0.64      | ..             |                |                 |
| <b>8 mg/ml</b>           | 0.58      | 0.95           | ..             |                 |
| <b>36 mg/ml</b>          | 0.19      | 0.07           | 0.07           | ..              |
| <b>Week 12</b>           |           |                |                |                 |
| <b>CS</b>                | ..        |                |                |                 |
| <b>0 mg/ml</b>           | 0.28      | ..             |                |                 |
| <b>8 mg/ml</b>           | 0.91      | 0.37           | ..             |                 |
| <b>36 mg/ml</b>          | 0.17      | 0.82           | 0.29           | ..              |
| <b>Week 24</b>           |           |                |                |                 |
| <b>CS</b>                | ..        |                |                |                 |
| <b>0 mg/ml</b>           | 0.64      | ..             |                |                 |
| <b>8 mg/ml</b>           | 0.88      | 0.67           | ..             |                 |
| <b>36 mg/ml</b>          | 0.07      | 0.34           | 0.15           | ..              |
| <b>Adjusted Model*</b>   |           |                |                |                 |
| <b>Week 0</b>            |           |                |                |                 |
|                          | <b>CS</b> | <b>0 mg/ml</b> | <b>8 mg/ml</b> | <b>36 mg/ml</b> |
| <b>CS</b>                | ..        |                |                |                 |
| <b>0 mg/ml</b>           | 0.85      | ..             |                |                 |
| <b>8 mg/ml</b>           | 0.58      | 0.46           | ..             |                 |
| <b>36 mg/ml</b>          | 0.62      | 0.50           | 0.95           | ..              |
| <b>Week 4</b>            |           |                |                |                 |
| <b>CS</b>                | ..        |                |                |                 |
| <b>0 mg/ml</b>           | 0.46      | ..             |                |                 |
| <b>8 mg/ml</b>           | 0.11      | 0.44           | ..             |                 |
| <b>36 mg/ml</b>          | 0.37      | 0.10           | 0.02           | ..              |
| <b>Week 12</b>           |           |                |                |                 |
| <b>CS</b>                | ..        |                |                |                 |
| <b>0 mg/ml</b>           | 0.28      | ..             |                |                 |
| <b>8 mg/ml</b>           | 0.47      | 0.10           | ..             |                 |

|                 |      |      |      |    |
|-----------------|------|------|------|----|
| <b>36 mg/ml</b> | 0.35 | 0.88 | 0.17 | .. |
| <b>Week 24</b>  |      |      |      |    |
| <b>CS</b>       | ..   |      |      |    |
| <b>0 mg/ml</b>  | 0.72 | ..   |      |    |
| <b>8 mg/ml</b>  | 0.56 | 0.25 | ..   |    |
| <b>36 mg/ml</b> | 0.15 | 0.49 | 0.07 | .. |

Note: CS, cigarette substitute. The adjusted model included the following covariates: site, gender, age, race/ethnicity, week 0 urinary cotinine (ng/mg creatinine-transformed), education level, week 0 environmental smoke score, week 0 partial INTERHEART non-laboratory score, week 0 forced expiratory volume in one second, week 0 forced vital capacity, and week 0 Penn State Cigarette Dependence Index score.

\* Bonferroni correction  $\alpha=0.008$ , between all conditions.

**Table S27. P-values for pairwise comparisons between conditions at each time point for urinary cotinine standardized by creatinine using intent-to-treat method**

| Unadjusted Model* |      |         |                   |          |
|-------------------|------|---------|-------------------|----------|
| Week 0            |      |         |                   |          |
|                   | CS   | 0 mg/ml | 8 mg/ml           | 36 mg/ml |
| CS                | ..   |         |                   |          |
| 0 mg/ml           | 0.99 | ..      |                   |          |
| 8 mg/ml           | 0.19 | 0.20    | ..                |          |
| 36 mg/ml          | 0.32 | 0.32    | 0.77              | ..       |
| Week 4            |      |         |                   |          |
| CS                | ..   |         |                   |          |
| 0 mg/ml           | 0.58 | ..      |                   |          |
| 8 mg/ml           | 0.47 | 0.87    | ..                |          |
| 36 mg/ml          | 0.13 | 0.05    | 0.03              | ..       |
| Week 12           |      |         |                   |          |
| CS                | ..   |         |                   |          |
| 0 mg/ml           | 0.23 | ..      |                   |          |
| 8 mg/ml           | 0.95 | 0.21    | ..                |          |
| 36 mg/ml          | 0.11 | 0.74    | 0.10              | ..       |
| Week 24           |      |         |                   |          |
| CS                | ..   |         |                   |          |
| 0 mg/ml           | 0.90 | ..      |                   |          |
| 8 mg/ml           | 0.65 | 0.59    | ..                |          |
| 36 mg/ml          | 0.09 | 0.14    | 0.04              | ..       |
| Adjusted Model*   |      |         |                   |          |
| Week 0            |      |         |                   |          |
|                   | CS   | 0 mg/ml | 8 mg/ml           | 36 mg/ml |
| CS                | ..   |         |                   |          |
| 0 mg/ml           | 0.82 | ..      |                   |          |
| 8 mg/ml           | 0.51 | 0.39    | ..                |          |
| 36 mg/ml          | 0.66 | 0.51    | 0.83              | ..       |
| Week 4            |      |         |                   |          |
| CS                | ..   |         |                   |          |
| 0 mg/ml           | 0.25 | ..      |                   |          |
| 8 mg/ml           | 0.08 | 0.58    | ..                |          |
| 36 mg/ml          | 0.31 | 0.04    | 0.01 <sup>S</sup> | ..       |
| Week 12           |      |         |                   |          |
| CS                | ..   |         |                   |          |
| 0 mg/ml           | 0.49 | ..      |                   |          |
| 8 mg/ml           | 0.64 | 0.27    | ..                |          |

|                 |      |      |      |    |
|-----------------|------|------|------|----|
| <b>36 mg/ml</b> | 0.22 | 0.66 | 0.10 | .. |
| <b>Week 24</b>  |      |      |      |    |
| <b>CS</b>       | ..   |      |      |    |
| <b>0 mg/ml</b>  | 0.55 | ..   |      |    |
| <b>8 mg/ml</b>  | 0.23 | 0.57 | ..   |    |
| <b>36 mg/ml</b> | 0.42 | 0.19 | 0.06 | .. |

Note: CS, cigarette substitute. The adjusted model included the following covariates: site, gender, age, race/ethnicity, week 0 urinary cotinine (ng/mg creatinine-transformed), education level, week 0 environmental smoke score, week 0 partial INTERHEART non-laboratory score, week 0 forced expiratory volume in one second, week 0 forced vital capacity, and week 0 Penn State Cigarette Dependence Index score.

\* Bonferroni correction  $\alpha=0.008$ , between all conditions.

S Significant difference between 8 mg/ml and 36 mg/ml at week 4 in adjusted model,  $p\text{-value}=0.006$ , comparing to Bonferroni correction  $\alpha=0.008$ .

**Table S28. P-values for pairwise comparisons between conditions at each time point for urinary cotinine standardized by creatinine using per-protocol method**

| <b>Unadjusted Model*</b> |           |                |                |                 |
|--------------------------|-----------|----------------|----------------|-----------------|
| <b>Week 0</b>            |           |                |                |                 |
|                          | <b>CS</b> | <b>0 mg/ml</b> | <b>8 mg/ml</b> | <b>36 mg/ml</b> |
| <b>CS</b>                | ..        |                |                |                 |
| <b>0 mg/ml</b>           | 0.62      | ..             |                |                 |
| <b>8 mg/ml</b>           | 0.66      | 0.37           | ..             |                 |
| <b>36 mg/ml</b>          | 0.26      | 0.12           | 0.53           | ..              |
| <b>Week 4</b>            |           |                |                |                 |
| <b>CS</b>                | ..        |                |                |                 |
| <b>0 mg/ml</b>           | 0.28      | ..             |                |                 |
| <b>8 mg/ml</b>           | 0.38      | 0.86           | ..             |                 |
| <b>36 mg/ml</b>          | 0.14      | 0.02           | 0.03           | ..              |
| <b>Week 12</b>           |           |                |                |                 |
| <b>CS</b>                | ..        |                |                |                 |
| <b>0 mg/ml</b>           | 0.63      | ..             |                |                 |
| <b>8 mg/ml</b>           | 0.77      | 0.46           | ..             |                 |
| <b>36 mg/ml</b>          | 0.10      | 0.29           | 0.07           | ..              |
| <b>Week 24</b>           |           |                |                |                 |
| <b>CS</b>                | ..        |                |                |                 |
| <b>0 mg/ml</b>           | 0.85      | ..             |                |                 |
| <b>8 mg/ml</b>           | 0.50      | 0.65           | ..             |                 |
| <b>36 mg/ml</b>          | 0.11      | 0.09           | 0.03           | ..              |
| <b>Adjusted Model*</b>   |           |                |                |                 |
| <b>Week 0</b>            |           |                |                |                 |
|                          | <b>CS</b> | <b>0 mg/ml</b> | <b>8 mg/ml</b> | <b>36 mg/ml</b> |
| <b>CS</b>                | ..        |                |                |                 |
| <b>0 mg/ml</b>           | 0.72      | ..             |                |                 |
| <b>8 mg/ml</b>           | 0.61      | 0.42           | ..             |                 |
| <b>36 mg/ml</b>          | 0.52      | 0.35           | 0.94           | ..              |
| <b>Week 4</b>            |           |                |                |                 |
| <b>CS</b>                | ..        |                |                |                 |
| <b>0 mg/ml</b>           | 0.22      | ..             |                |                 |
| <b>8 mg/ml</b>           | 0.29      | 0.89           | ..             |                 |
| <b>36 mg/ml</b>          | 0.28      | 0.03           | 0.05           | ..              |
| <b>Week 12</b>           |           |                |                |                 |
| <b>CS</b>                | ..        |                |                |                 |
| <b>0 mg/ml</b>           | 0.84      | ..             |                |                 |
| <b>8 mg/ml</b>           | 0.93      | 0.79           | ..             |                 |

|                 |      |      |      |    |
|-----------------|------|------|------|----|
| <b>36 mg/ml</b> | 0.25 | 0.38 | 0.26 | .. |
| <b>Week 24</b>  |      |      |      |    |
| <b>CS</b>       | ..   |      |      |    |
| <b>0 mg/ml</b>  | 0.49 | ..   |      |    |
| <b>8 mg/ml</b>  | 0.26 | 0.68 | ..   |    |
| <b>36 mg/ml</b> | 0.41 | 0.15 | 0.06 | .. |

Note: CS, cigarette substitute. The adjusted model included the following covariates: site, gender, age, race/ethnicity, week 0 urinary cotinine (ng/mg creatinine-transformed), education level, week 0 environmental smoke score, week 0 partial INTERHEART non-laboratory score, week 0 forced expiratory volume in one second, week 0 forced vital capacity, and week 0 Penn State Cigarette Dependence Index score.

\* Bonferroni correction  $\alpha=0.008$ , between all conditions.



**Table S29. P-values for pairwise comparisons between conditions at each time point for urinary cotinine standardized by creatinine using baseline-carried-forward method**

| <b>Unadjusted Model*</b> |      |         |                   |          |
|--------------------------|------|---------|-------------------|----------|
| <b>Week 0</b>            |      |         |                   |          |
|                          | CS   | 0 mg/ml | 8 mg/ml           | 36 mg/ml |
| CS                       | ..   |         |                   |          |
| 0 mg/ml                  | 0.99 | ..      |                   |          |
| 8 mg/ml                  | 0.18 | 0.18    | ..                |          |
| 36 mg/ml                 | 0.30 | 0.31    | 0.76              | ..       |
| <b>Week 4</b>            |      |         |                   |          |
| CS                       | ..   |         |                   |          |
| 0 mg/ml                  | 0.60 | ..      |                   |          |
| 8 mg/ml                  | 0.66 | 0.93    | ..                |          |
| 36 mg/ml                 | 0.14 | 0.05    | 0.06              | ..       |
| <b>Week 12</b>           |      |         |                   |          |
| CS                       | ..   |         |                   |          |
| 0 mg/ml                  | 0.27 | ..      |                   |          |
| 8 mg/ml                  | 0.46 | 0.72    | ..                |          |
| 36 mg/ml                 | 0.12 | 0.66    | 0.42              | ..       |
| <b>Week 24</b>           |      |         |                   |          |
| CS                       | ..   |         |                   |          |
| 0 mg/ml                  | 0.62 | ..      |                   |          |
| 8 mg/ml                  | 0.44 | 0.78    | ..                |          |
| 36 mg/ml                 | 0.11 | 0.28    | 0.42              | ..       |
| <b>Adjusted Model*</b>   |      |         |                   |          |
| <b>Week 0</b>            |      |         |                   |          |
|                          | CS   | 0 mg/ml | 8 mg/ml           | 36 mg/ml |
| CS                       | ..   |         |                   |          |
| 0 mg/ml                  | 0.83 | ..      |                   |          |
| 8 mg/ml                  | 0.58 | 0.45    | ..                |          |
| 36 mg/ml                 | 0.68 | 0.53    | 0.88              | ..       |
| <b>Week 4</b>            |      |         |                   |          |
| CS                       | ..   |         |                   |          |
| 0 mg/ml                  | 0.30 | ..      |                   |          |
| 8 mg/ml                  | 0.07 | 0.43    | ..                |          |
| 36 mg/ml                 | 0.32 | 0.05    | 0.01 <sup>S</sup> | ..       |
| <b>Week 12</b>           |      |         |                   |          |
| CS                       | ..   |         |                   |          |
| 0 mg/ml                  | 0.43 | ..      |                   |          |
| 8 mg/ml                  | 0.96 | 0.42    | ..                |          |

|                 |      |      |      |    |
|-----------------|------|------|------|----|
| <b>36 mg/ml</b> | 0.26 | 0.74 | 0.25 | .. |
| <b>Week 24</b>  |      |      |      |    |
| <b>CS</b>       | ..   |      |      |    |
| <b>0 mg/ml</b>  | 0.82 | ..   |      |    |
| <b>8 mg/ml</b>  | 0.68 | 0.86 | ..   |    |
| <b>36 mg/ml</b> | 0.46 | 0.34 | 0.26 | .. |

Note: CS, cigarette substitute. The adjusted model included the following covariates: site, gender, age, race/ethnicity, week 0 urinary cotinine (ng/mg creatinine-transformed), education level, week 0 environmental smoke score, week 0 partial INTERHEART non-laboratory score, week 0 forced expiratory volume in one second, week 0 forced vital capacity, and week 0 Penn State Cigarette Dependence Index score.

\* Bonferroni correction  $\alpha=0.008$ , between all conditions.

S Significant difference between 8 mg/ml and 36 mg/ml at week 4 in adjusted model,  $p\text{-value}=0.005$ , comparing to Bonferroni correction  $\alpha=0.008$ .

**Table S30. P-values for pairwise comparisons between conditions at each time point for urinary cotinine standardized by creatinine using last-observation-carried-forward method**

| <b>Unadjusted Model*</b> |           |                |                |                 |
|--------------------------|-----------|----------------|----------------|-----------------|
| <b>Week 0</b>            |           |                |                |                 |
|                          | <b>CS</b> | <b>0 mg/ml</b> | <b>8 mg/ml</b> | <b>36 mg/ml</b> |
| <b>CS</b>                | ..        |                |                |                 |
| <b>0 mg/ml</b>           | 0.99      | ..             |                |                 |
| <b>8 mg/ml</b>           | 0.18      | 0.19           | ..             |                 |
| <b>36 mg/ml</b>          | 0.30      | 0.31           | 0.76           | ..              |
| <b>Week 4</b>            |           |                |                |                 |
| <b>CS</b>                | ..        |                |                |                 |
| <b>0 mg/ml</b>           | 0.60      | ..             |                |                 |
| <b>8 mg/ml</b>           | 0.67      | 0.93           | ..             |                 |
| <b>36 mg/ml</b>          | 0.15      | 0.05           | 0.06           | ..              |
| <b>Week 12</b>           |           |                |                |                 |
| <b>CS</b>                | ..        |                |                |                 |
| <b>0 mg/ml</b>           | 0.23      | ..             |                |                 |
| <b>8 mg/ml</b>           | 0.85      | 0.32           | ..             |                 |
| <b>36 mg/ml</b>          | 0.11      | 0.68           | 0.16           | ..              |
| <b>Week 24</b>           |           |                |                |                 |
| <b>CS</b>                | ..        |                |                |                 |
| <b>0 mg/ml</b>           | 0.47      | ..             |                |                 |
| <b>8 mg/ml</b>           | 0.87      | 0.38           | ..             |                 |
| <b>36 mg/ml</b>          | 0.10      | 0.36           | 0.07           | ..              |
| <b>Adjusted Model*</b>   |           |                |                |                 |
| <b>Week 0</b>            |           |                |                |                 |
|                          | <b>CS</b> | <b>0 mg/ml</b> | <b>8 mg/ml</b> | <b>36 mg/ml</b> |
| <b>CS</b>                | ..        |                |                |                 |
| <b>0 mg/ml</b>           | 0.81      | ..             |                |                 |
| <b>8 mg/ml</b>           | 0.50      | 0.37           | ..             |                 |
| <b>36 mg/ml</b>          | 0.66      | 0.51           | 0.81           | ..              |
| <b>Week 4</b>            |           |                |                |                 |
| <b>CS</b>                | ..        |                |                |                 |
| <b>0 mg/ml</b>           | 0.31      | ..             |                |                 |
| <b>8 mg/ml</b>           | 0.11      | 0.56           | ..             |                 |
| <b>36 mg/ml</b>          | 0.32      | 0.05           | 0.01           | ..              |
| <b>Week 12</b>           |           |                |                |                 |
| <b>CS</b>                | ..        |                |                |                 |
| <b>0 mg/ml</b>           | 0.42      | ..             |                |                 |
| <b>8 mg/ml</b>           | 0.48      | 0.14           | ..             |                 |

|                 |      |      |      |    |
|-----------------|------|------|------|----|
| <b>36 mg/ml</b> | 0.25 | 0.76 | 0.07 | .. |
| <b>Week 24</b>  |      |      |      |    |
| <b>CS</b>       | ..   |      |      |    |
| <b>0 mg/ml</b>  | 0.93 | ..   |      |    |
| <b>8 mg/ml</b>  | 0.13 | 0.12 | ..   |    |
| <b>36 mg/ml</b> | 0.37 | 0.43 | 0.02 | .. |

Note: CS, cigarette substitute. The adjusted model included the following covariates: site, gender, age, race/ethnicity, week 0 urinary cotinine (ng/mg creatinine-transformed), education level, week 0 environmental smoke score, week 0 partial INTERHEART non-laboratory score, week 0 forced expiratory volume in one second, week 0 forced vital capacity, and week 0 Penn State Cigarette Dependence Index score.

\* Bonferroni correction  $\alpha=0.008$ , between all conditions.

**Table S31. P-values for pairwise comparisons relative to baseline within each condition for urinary cotinine standardized by creatinine using multiple imputation method**

| <b>Unadjusted Model*</b> |                   |                |                |                 |
|--------------------------|-------------------|----------------|----------------|-----------------|
|                          | <b>CS</b>         | <b>0 mg/ml</b> | <b>8 mg/ml</b> | <b>36 mg/ml</b> |
| <b>Week 4</b>            | 0.71              | 0.30           | 0.01           | 0.84            |
| <b>Week 12</b>           | 0.02              | 0.33           | 0.001          | 0.09            |
| <b>Week 24</b>           | 0.09              | 0.36           | 0.01           | 0.38            |
| <b>Adjusted Model*</b>   |                   |                |                |                 |
|                          | <b>CS</b>         | <b>0 mg/ml</b> | <b>8 mg/ml</b> | <b>36 mg/ml</b> |
| <b>Week 4</b>            | 0.70              | 0.29           | 0.01           | 0.84            |
| <b>Week 12</b>           | 0.02 <sup>S</sup> | 0.29           | 0.0004         | 0.07            |
| <b>Week 24</b>           | 0.06              | 0.33           | 0.01           | 0.32            |

Note: CS, cigarette substitute. The adjusted model included the following covariates: site, gender, age, race/ethnicity, week 0 urinary cotinine (ng/mg creatinine-transformed), education level, week 0 environmental smoke score, week 0 partial INTERHEART non-laboratory score, week 0 forced expiratory volume in one second, week 0 forced vital capacity, and week 0 Penn State Cigarette Dependence Index score.

\* Bonferroni correction alpha=0.017, relative to baseline (week 0).

S Significant difference between week 12 and week 0 in cigarette substitute condition for adjusted model, p-value=0.015, comparing to Bonferroni correction alpha=0.017.

**Table S32. P-values for pairwise comparisons relative to baseline within each condition for urinary cotinine standardized by creatinine using intent-to-treat method**

| <b>Unadjusted Model*</b> |           |                |                |                 |
|--------------------------|-----------|----------------|----------------|-----------------|
|                          | <b>CS</b> | <b>0 mg/ml</b> | <b>8 mg/ml</b> | <b>36 mg/ml</b> |
| <b>Week 4</b>            | 0.75      | 0.29           | 0.003          | 0.64            |
| <b>Week 12</b>           | 0.03      | 0.51           | 0.0004         | 0.19            |
| <b>Week 24</b>           | 0.10      | 0.17           | 0.001          | 0.55            |
| <b>Adjusted Model*</b>   |           |                |                |                 |
|                          | <b>CS</b> | <b>0 mg/ml</b> | <b>8 mg/ml</b> | <b>36 mg/ml</b> |
| <b>Week 4</b>            | 0.86      | 0.20           | 0.002          | 0.57            |
| <b>Week 12</b>           | 0.02      | 0.23           | 0.0008         | 0.15            |
| <b>Week 24</b>           | 0.10      | 0.06           | 0.0009         | 0.28            |

Note: CS, cigarette substitute. The adjusted model included the following covariates: site, gender, age, race/ethnicity, week 0 urinary cotinine (ng/mg creatinine-transformed), education level, week 0 environmental smoke score, week 0 partial INTERHEART non-laboratory score, week 0 forced expiratory volume in one second, week 0 forced vital capacity, and week 0 Penn State Cigarette Dependence Index score.

\* Bonferroni correction  $\alpha=0.017$ , relative to baseline (week 0).

**Table S33. P-values for pairwise comparisons relative to baseline within each condition for urinary cotinine standardized by creatinine using per-protocol method**

| <b>Unadjusted Model*</b> |           |                |                |                 |
|--------------------------|-----------|----------------|----------------|-----------------|
|                          | <b>CS</b> | <b>0 mg/ml</b> | <b>8 mg/ml</b> | <b>36 mg/ml</b> |
| <b>Week 4</b>            | 0.76      | 0.30           | 0.05           | 0.86            |
| <b>Week 12</b>           | 0.06      | 0.52           | 0.01           | 0.21            |
| <b>Week 24</b>           | 0.16      | 0.35           | 0.02           | 0.40            |
| <b>Adjusted Model*</b>   |           |                |                |                 |
|                          | <b>CS</b> | <b>0 mg/ml</b> | <b>8 mg/ml</b> | <b>36 mg/ml</b> |
| <b>Week 4</b>            | 0.78      | 0.20           | 0.04           | 0.79            |
| <b>Week 12</b>           | 0.05      | 0.26           | 0.03           | 0.19            |
| <b>Week 24</b>           | 0.16      | 0.12           | 0.01           | 0.25            |

Note: CS, cigarette substitute. The adjusted model included the following covariates: site, gender, age, race/ethnicity, week 0 urinary cotinine (ng/mg creatinine-transformed), education level, week 0 environmental smoke score, week 0 partial INTERHEART non-laboratory score, week 0 forced expiratory volume in one second, week 0 forced vital capacity, and week 0 Penn State Cigarette Dependence Index score.

\* Bonferroni correction  $\alpha=0.017$ , relative to baseline (week 0).

**Table S34. P-values for pairwise comparisons relative to baseline within each condition for urinary cotinine standardized by creatinine using baseline-carried-forward method**

| <b>Unadjusted Model*</b> |           |                |                |                 |
|--------------------------|-----------|----------------|----------------|-----------------|
|                          | <b>CS</b> | <b>0 mg/ml</b> | <b>8 mg/ml</b> | <b>36 mg/ml</b> |
| <b>Week 4</b>            | 0.75      | 0.26           | 0.003          | 0.75            |
| <b>Week 12</b>           | 0.04      | 0.46           | 0.01           | 0.15            |
| <b>Week 24</b>           | 0.19      | 0.43           | 0.05           | 0.47            |
| <b>Adjusted Model*</b>   |           |                |                |                 |
|                          | <b>CS</b> | <b>0 mg/ml</b> | <b>8 mg/ml</b> | <b>36 mg/ml</b> |
| <b>Week 4</b>            | 0.83      | 0.23           | 0.002          | 0.61            |
| <b>Week 12</b>           | 0.03      | 0.28           | 0.01           | 0.16            |
| <b>Week 24</b>           | 0.16      | 0.17           | 0.02           | 0.29            |

Note: CS, cigarette substitute. The adjusted model included the following covariates: site, gender, age, race/ethnicity, week 0 urinary cotinine (ng/mg creatinine-transformed), education level, week 0 environmental smoke score, week 0 partial INTERHEART non-laboratory score, week 0 forced expiratory volume in one second, week 0 forced vital capacity, and week 0 Penn State Cigarette Dependence Index score.

\* Bonferroni correction  $\alpha=0.017$ , relative to baseline (week 0).



**Table S35. P-values for pairwise comparisons relative to baseline within each condition for urinary cotinine standardized by creatinine using last-observation-carried-forward method**

| <b>Unadjusted Model*</b> |      |         |         |          |
|--------------------------|------|---------|---------|----------|
|                          | CS   | 0 mg/ml | 8 mg/ml | 36 mg/ml |
| <b>Week 4</b>            | 0.74 | 0.24    | 0.002   | 0.73     |
| <b>Week 12</b>           | 0.03 | 0.50    | 0.0003  | 0.15     |
| <b>Week 24</b>           | 0.10 | 0.39    | 0.0007  | 0.33     |
| <b>Adjusted Model*</b>   |      |         |         |          |
|                          | CS   | 0 mg/ml | 8 mg/ml | 36 mg/ml |
| <b>Week 4</b>            | 0.83 | 0.21    | 0.001   | 0.60     |
| <b>Week 12</b>           | 0.03 | 0.35    | 0.0003  | 0.17     |
| <b>Week 24</b>           | 0.10 | 0.20    | 0.0001  | 0.24     |

Note: CS, cigarette substitute. The adjusted model included the following covariates: site, gender, age, race/ethnicity, week 0 urinary cotinine (ng/mg creatinine-transformed), education level, week 0 environmental smoke score, week 0 partial INTERHEART non-laboratory score, week 0 forced expiratory volume in one second, week 0 forced vital capacity, and week 0 Penn State Cigarette Dependence Index score.

\* Bonferroni correction  $\alpha=0.017$ , relative to baseline (week 0).

**Table S36. Estimated mean exhaled carbon monoxide in unadjusted and adjusted mixed models using multiple imputation method**

| CO, parts per million |     | Unadjusted Model           |         |                            |         |                            |          |                            |
|-----------------------|-----|----------------------------|---------|----------------------------|---------|----------------------------|----------|----------------------------|
| Condition             | CS  |                            | 0 mg/ml |                            | 8 mg/ml |                            | 36 mg/ml |                            |
| Week                  | N   | Estimated Mean<br>(95% CI) | N       | Estimated Mean<br>(95% CI) | N       | Estimated Mean<br>(95% CI) | N        | Estimated Mean<br>(95% CI) |
| Week 0                | 130 | 23.65<br>(21.76, 25.53)    | 130     | 23.35<br>(21.47, 25.24)    | 130     | 21.84<br>(19.95, 23.73)    | 130      | 21.94<br>(20.05, 23.83)    |
| Week 1                | 130 | 21.36<br>(19.45, 23.27)    | 130     | 21.00<br>(18.98, 23.01)    | 130     | 16.20<br>(14.26, 18.13)    | 130      | 17.69<br>(15.79, 19.58)    |
| Week 2                | 130 | 21.12<br>(19.12, 23.12)    | 130     | 19.91<br>(17.76, 22.06)    | 130     | 15.86<br>(13.88, 17.85)    | 130      | 17.39<br>(15.47, 19.31)    |
| Week 4                | 130 | 20.37<br>(18.32, 22.41)    | 130     | 19.97<br>(18.04, 21.90)    | 130     | 15.78<br>(13.79, 17.76)    | 130      | 15.67<br>(13.67, 17.67)    |
| Week 8                | 130 | 20.98<br>(19.01, 22.94)    | 130     | 19.88<br>(17.55, 22.21)    | 130     | 16.19<br>(14.12, 18.26)    | 130      | 16.44<br>(14.51, 18.38)    |
| Week 12               | 130 | 20.05<br>(17.82, 22.27)    | 130     | 21.29<br>(19.04, 23.53)    | 130     | 16.64<br>(14.65, 18.63)    | 130      | 16.55<br>(14.50, 18.60)    |
| Week 16               | 130 | 21.81<br>(19.85, 23.77)    | 130     | 21.87<br>(19.76, 23.99)    | 130     | 16.50<br>(14.40, 18.59)    | 130      | 17.15<br>(15.04, 19.26)    |
| Week 20               | 130 | 20.71<br>(18.78, 22.65)    | 130     | 21.02<br>(18.74, 23.29)    | 130     | 16.56<br>(14.21, 18.91)    | 130      | 15.34<br>(13.34, 17.34)    |
| Week 24               | 130 | 20.79<br>(18.67, 22.90)    | 130     | 21.31<br>(19.27, 23.36)    | 130     | 17.56<br>(15.09, 20.02)    | 130      | 16.93<br>(14.50, 19.35)    |
|                       |     | <b>Adjusted Model</b>      |         |                            |         |                            |          |                            |
| Week 0                | 130 | 23.82<br>(22.23, 25.41)    | 130     | 23.33<br>(21.73, 24.93)    | 130     | 22.87<br>(21.25, 24.49)    | 130      | 22.95<br>(21.37, 24.54)    |
| Week 1                | 130 | 21.53<br>(19.94, 23.12)    | 130     | 20.97<br>(19.12, 22.81)    | 130     | 17.23<br>(15.52, 18.94)    | 130      | 18.70<br>(17.11, 20.29)    |
| Week 2                | 130 | 21.29<br>(19.61, 22.97)    | 130     | 19.88<br>(17.9, 21.86)     | 130     | 16.90<br>(15.15, 18.64)    | 130      | 18.40<br>(16.74, 20.07)    |
| Week 4                | 130 | 20.54<br>(18.87, 22.21)    | 130     | 19.94<br>(18.32, 21.57)    | 130     | 16.81<br>(15.08, 18.53)    | 130      | 16.68<br>(15.03, 18.34)    |
| Week 8                | 130 | 21.15<br>(19.47, 22.82)    | 130     | 19.86<br>(17.74, 21.97)    | 130     | 17.22<br>(15.56, 18.89)    | 130      | 17.46<br>(15.78, 19.13)    |
| Week 12               | 130 | 20.22<br>(18.24, 22.20)    | 130     | 21.26<br>(19.18, 23.34)    | 130     | 17.67<br>(15.95, 19.39)    | 130      | 17.56<br>(15.79, 19.34)    |
| Week 16               | 130 | 21.98<br>(20.39, 23.57)    | 130     | 21.85<br>(19.86, 23.84)    | 130     | 17.53<br>(15.73, 19.32)    | 130      | 18.17<br>(16.24, 20.10)    |
| Week 20               | 130 | 20.88<br>(19.22, 22.55)    | 130     | 20.99<br>(18.88, 23.1)     | 130     | 17.59<br>(15.54, 19.64)    | 130      | 16.36<br>(14.56, 18.16)    |
| Week 24               | 130 | 20.96<br>(18.95, 22.96)    | 130     | 21.29<br>(19.55, 23.02)    | 130     | 18.59<br>(16.14, 21.03)    | 130      | 17.94<br>(15.6, 20.28)     |

Note: CO, carbon monoxide; CS, cigarette substitute; CI, confidence interval. The adjusted model included the following covariates: site, gender, age, race/ethnicity, week 0 exhaled CO, week 0 cigarettes smoked per day, week 0 urinary total NNAL (pg/mg creatinine-transformed), week 0 body mass index, education level, total household income, age of smoking initiation, week 0 waist circumference, week 0 partial INTERHEART non-laboratory score, week 0 Penn State Cigarette Dependence Index score, and week 0 forced expiratory volume in one second.

**Table S37. Estimated mean exhaled carbon monoxide in unadjusted and adjusted mixed models using intent-to-treat method**

| CO, parts per million |     | Unadjusted Model        |         |                         |         |                         |          |                         |
|-----------------------|-----|-------------------------|---------|-------------------------|---------|-------------------------|----------|-------------------------|
| Condition             | CS  |                         | 0 mg/ml |                         | 8 mg/ml |                         | 36 mg/ml |                         |
| Week                  | N   | Estimated Mean (95% CI) | N       | Estimated Mean (95% CI) | N       | Estimated Mean (95% CI) | N        | Estimated Mean (95% CI) |
| Week 0                | 130 | 23.65<br>(21.73, 25.56) | 130     | 23.35<br>(21.44, 25.27) | 130     | 21.84<br>(19.92, 23.76) | 130      | 21.94<br>(20.02, 23.86) |
| Week 1                | 121 | 21.2<br>(19.25, 23.16)  | 112     | 20.78<br>(18.78, 22.78) | 116     | 16.16<br>(14.18, 18.13) | 120      | 17.74<br>(15.78, 19.69) |
| Week 2                | 115 | 21.06<br>(19.07, 23.05) | 103     | 20.14<br>(18.07, 22.21) | 116     | 15.75<br>(13.76, 17.74) | 112      | 17.16<br>(15.15, 19.17) |
| Week 4                | 115 | 19.89<br>(17.88, 21.90) | 96      | 19.64<br>(17.49, 21.78) | 109     | 15.79<br>(13.74, 17.83) | 112      | 15.39<br>(13.36, 17.42) |
| Week 8                | 95  | 21.03<br>(18.90, 23.16) | 84      | 19.28<br>(17.00, 21.56) | 92      | 15.98<br>(13.81, 18.15) | 95       | 16.31<br>(14.17, 18.45) |
| Week 12               | 91  | 19.74<br>(17.54, 21.94) | 77      | 20.99<br>(18.60, 23.38) | 85      | 16.57<br>(14.31, 18.84) | 93       | 16.38<br>(14.18, 18.58) |
| Week 16               | 85  | 21.71<br>(19.43, 23.99) | 71      | 21.60<br>(19.11, 24.10) | 77      | 16.18<br>(13.81, 18.54) | 84       | 16.96<br>(14.66, 19.26) |
| Week 20               | 86  | 20.87<br>(18.57, 23.18) | 65      | 20.59<br>(18.00, 23.18) | 72      | 16.10<br>(13.64, 18.56) | 78       | 14.87<br>(12.48, 17.26) |
| Week 24               | 91  | 20.38<br>(18.10, 22.66) | 69      | 19.47<br>(16.88, 22.06) | 74      | 17.45<br>(14.96, 19.95) | 80       | 16.41<br>(13.99, 18.82) |
|                       |     | Adjusted Model          |         |                         |         |                         |          |                         |
| Week 0                | 130 | 23.70<br>(22.04, 25.36) | 130     | 22.97<br>(21.22, 24.71) | 130     | 22.92<br>(21.19, 24.66) | 130      | 22.80<br>(21.12, 24.48) |
| Week 1                | 121 | 21.13<br>(19.43, 22.82) | 112     | 19.59<br>(17.76, 21.41) | 116     | 17.22<br>(15.43, 19.02) | 120      | 18.56<br>(16.84, 20.27) |
| Week 2                | 115 | 21.31<br>(19.58, 23.05) | 103     | 18.95<br>(17.06, 20.85) | 116     | 16.43<br>(14.63, 18.24) | 112      | 17.74<br>(15.98, 19.49) |
| Week 4                | 115 | 20.49<br>(18.74, 22.23) | 96      | 18.95<br>(16.99, 20.90) | 109     | 16.47<br>(14.62, 18.32) | 112      | 16.37<br>(14.61, 18.14) |
| Week 8                | 95  | 21.07<br>(19.21, 22.93) | 84      | 19.24<br>(17.17, 21.31) | 92      | 17.17<br>(15.18, 19.16) | 95       | 16.95<br>(15.06, 18.83) |
| Week 12               | 91  | 20.20<br>(18.29, 22.10) | 77      | 21.56<br>(19.41, 23.71) | 85      | 17.39<br>(15.30, 19.48) | 93       | 17.17<br>(15.26, 19.09) |
| Week 16               | 85  | 22.50<br>(20.54, 24.46) | 71      | 22.01<br>(19.77, 24.25) | 77      | 17.27<br>(15.09, 19.44) | 84       | 17.17<br>(15.16, 19.17) |
| Week 20               | 86  | 20.91<br>(18.93, 22.88) | 65      | 21.15<br>(18.83, 23.47) | 72      | 17.25<br>(15.02, 19.48) | 78       | 14.98<br>(12.90, 17.06) |
| Week 24               | 91  | 20.50<br>(18.56, 22.43) | 69      | 19.62<br>(17.33, 21.92) | 74      | 18.78<br>(16.53, 21.02) | 80       | 16.72<br>(14.64, 18.79) |

Note: CO, carbon monoxide; CS, cigarette substitute; CI, confidence interval. The adjusted model included the following covariates: site, gender, age, race/ethnicity, week 0 exhaled CO, week 0 cigarettes smoked per day, week 0 urinary total NNAL (pg/mg creatinine-transformed), week 0 body mass index, education level, total household income, age of smoking initiation, week 0 waist circumference, week 0 partial INTERHEART non-laboratory score, week 0 Penn State Cigarette Dependence Index score, and week 0 forced expiratory volume in one second.

**Table S38. Estimated mean exhaled carbon monoxide in unadjusted and adjusted mixed models using per-protocol method**

| CO, parts per million |    | Unadjusted Model        |         |                         |         |                         |          |                         |
|-----------------------|----|-------------------------|---------|-------------------------|---------|-------------------------|----------|-------------------------|
| Condition             | CS |                         | 0 mg/ml |                         | 8 mg/ml |                         | 36 mg/ml |                         |
| Week                  | N  | Estimated Mean (95% CI) | N       | Estimated Mean (95% CI) | N       | Estimated Mean (95% CI) | N        | Estimated Mean (95% CI) |
| Week 0                | 85 | 23.74<br>(21.37, 26.11) | 67      | 21.10<br>(18.44, 23.77) | 67      | 21.87<br>(19.20, 24.53) | 79       | 21.77<br>(19.32, 24.23) |
| Week 1                | 83 | 21.66<br>(19.28, 24.04) | 65      | 19.19<br>(16.51, 21.88) | 64      | 15.44<br>(12.74, 18.13) | 78       | 18.49<br>(16.03, 20.95) |
| Week 2                | 83 | 21.85<br>(19.47, 24.23) | 65      | 19.19<br>(16.50, 21.88) | 67      | 15.22<br>(12.56, 17.89) | 77       | 17.28<br>(14.81, 19.74) |
| Week 4                | 85 | 20.18<br>(17.81, 22.54) | 67      | 18.72<br>(16.05, 21.38) | 67      | 14.61<br>(11.95, 17.28) | 79       | 14.97<br>(12.52, 17.43) |
| Week 8                | 79 | 21.29<br>(18.89, 23.70) | 66      | 18.28<br>(15.60, 20.95) | 66      | 15.52<br>(12.85, 18.20) | 75       | 15.34<br>(12.86, 17.83) |
| Week 12               | 85 | 19.81<br>(17.44, 22.18) | 67      | 20.60<br>(17.93, 23.26) | 67      | 16.06<br>(13.39, 18.73) | 79       | 15.24<br>(12.78, 17.70) |
| Week 16               | 79 | 21.61<br>(19.20, 24.02) | 64      | 20.93<br>(18.24, 23.62) | 63      | 15.65<br>(12.94, 18.35) | 77       | 15.04<br>(12.57, 17.51) |
| Week 20               | 80 | 21.14<br>(18.73, 23.54) | 61      | 20.33<br>(17.61, 23.05) | 65      | 16.16<br>(13.47, 18.84) | 77       | 13.62<br>(11.15, 16.09) |
| Week 24               | 85 | 20.81<br>(18.44, 23.18) | 67      | 19.30<br>(16.63, 21.97) | 67      | 17.52<br>(14.86, 20.19) | 79       | 15.58<br>(13.13, 18.04) |
|                       |    | Adjusted Model          |         |                         |         |                         |          |                         |
| Week 0                | 85 | 23.22<br>(21.07, 25.37) | 67      | 21.51<br>(19.02, 24.00) | 67      | 22.58<br>(20.07, 25.09) | 79       | 22.78<br>(20.53, 25.02) |
| Week 1                | 83 | 20.99<br>(18.84, 23.15) | 65      | 18.66<br>(16.15, 21.18) | 64      | 16.02<br>(13.47, 18.57) | 78       | 19.47<br>(17.21, 21.72) |
| Week 2                | 83 | 21.37<br>(19.21, 23.54) | 65      | 18.61<br>(16.10, 21.13) | 67      | 15.51<br>(13.00, 18.02) | 77       | 18.04<br>(15.78, 20.31) |
| Week 4                | 85 | 19.99<br>(17.84, 22.14) | 67      | 18.70<br>(16.21, 21.19) | 67      | 14.94<br>(12.44, 17.45) | 79       | 15.91<br>(13.67, 18.16) |
| Week 8                | 79 | 20.76<br>(18.56, 22.96) | 66      | 18.61<br>(16.11, 21.11) | 66      | 16.66<br>(14.14, 19.18) | 75       | 16.23<br>(13.95, 18.50) |
| Week 12               | 85 | 19.74<br>(17.59, 21.89) | 67      | 21.11<br>(18.62, 23.60) | 67      | 17.05<br>(14.55, 19.56) | 79       | 16.13<br>(13.89, 18.38) |
| Week 16               | 79 | 21.94<br>(19.75, 24.13) | 64      | 21.30<br>(18.79, 23.81) | 63      | 16.52<br>(13.97, 19.07) | 77       | 15.89<br>(13.63, 18.16) |
| Week 20               | 80 | 20.75<br>(18.56, 22.94) | 61      | 20.52<br>(17.97, 23.07) | 65      | 17.23<br>(14.71, 19.75) | 77       | 14.24<br>(11.98, 16.50) |
| Week 24               | 85 | 20.60<br>(18.45, 22.75) | 67      | 19.15<br>(16.66, 21.63) | 67      | 18.65<br>(16.15, 21.16) | 79       | 16.20<br>(13.96, 18.45) |

Note: CS, cigarette substitute; CO, carbon monoxide; CI, confidence interval. The adjusted model included the following covariates: site, gender, age, race/ethnicity, week 0 exhaled CO, week 0 cigarettes smoked per day, week 0 urinary total NNAL (pg/mg creatinine-transformed), week 0 body mass index, education level, total household income, age of smoking initiation, week 0 waist circumference, week 0 partial INTERHEART non-laboratory score, week 0 Penn State Cigarette Dependence Index score, and week 0 forced expiratory volume in one second. Sample size included participants who have available carbon monoxide at week 0, 4, 12 and 24, which is N=85, 67, 67 and 79 for CS, 0 mg/ml, 8 mg/ml and 36 mg/ml, respectively.

**Table S39. Estimated mean exhaled carbon monoxide in unadjusted and adjusted mixed models using baseline-carried-forward method**

| CO, parts per million | Unadjusted Model |                         |         |                         |         |                         |          |                         |
|-----------------------|------------------|-------------------------|---------|-------------------------|---------|-------------------------|----------|-------------------------|
| Condition             | CS               |                         | 0 mg/ml |                         | 8 mg/ml |                         | 36 mg/ml |                         |
| Week                  | N                | Estimated Mean (95% CI) | N       | Estimated Mean (95% CI) | N       | Estimated Mean (95% CI) | N        | Estimated Mean (95% CI) |
| Week 0                | 130              | 23·65<br>(21·67, 25·62) | 130     | 23·35<br>(21·38, 25·33) | 130     | 21·84<br>(19·87, 23·81) | 130      | 21·94<br>(19·97, 23·91) |
| Week 1                | 130              | 21·49<br>(19·52, 23·46) | 130     | 20·98<br>(19·01, 22·96) | 130     | 16·67<br>(14·70, 18·64) | 130      | 17·93<br>(15·96, 19·90) |
| Week 2                | 130              | 21·59<br>(19·62, 23·56) | 130     | 20·71<br>(18·74, 22·68) | 130     | 16·45<br>(14·47, 18·42) | 130      | 17·54<br>(15·57, 19·51) |
| Week 4                | 130              | 20·96<br>(18·99, 22·93) | 130     | 21·23<br>(19·26, 23·2)  | 130     | 16·75<br>(14·78, 18·73) | 130      | 15·88<br>(13·91, 17·86) |
| Week 8                | 130              | 21·55<br>(19·57, 23·52) | 130     | 21·15<br>(19·18, 23·13) | 130     | 17·51<br>(15·54, 19·48) | 130      | 17·13<br>(15·16, 19·10) |
| Week 12               | 130              | 21·06<br>(19·09, 23·03) | 130     | 23·00<br>(21·03, 24·97) | 130     | 18·12<br>(16·15, 20·09) | 130      | 17·58<br>(15·61, 19·56) |
| Week 16               | 130              | 23·07<br>(21·10, 25·04) | 130     | 23·55<br>(21·57, 25·52) | 130     | 18·07<br>(16·10, 20·04) | 130      | 18·43<br>(16·46, 20·40) |
| Week 20               | 130              | 22·18<br>(20·21, 24·16) | 130     | 23·04<br>(21·07, 25·01) | 130     | 18·35<br>(16·37, 20·32) | 130      | 16·92<br>(14·95, 18·89) |
| Week 24               | 130              | 21·38<br>(19·41, 23·35) | 130     | 22·46<br>(20·49, 24·43) | 130     | 19·12<br>(17·15, 21·09) | 130      | 18·09<br>(16·12, 20·06) |
|                       | Adjusted Model   |                         |         |                         |         |                         |          |                         |
| Week 0                | 130              | 23·69<br>(22·17, 25·2)  | 130     | 23·06<br>(21·47, 24·66) | 130     | 23·09<br>(21·51, 24·67) | 130      | 23·05<br>(21·52, 24·58) |
| Week 1                | 130              | 21·39<br>(19·87, 22·90) | 130     | 20·07<br>(18·48, 21·66) | 130     | 17·93<br>(16·35, 19·52) | 130      | 18·97<br>(17·44, 20·50) |
| Week 2                | 130              | 21·68<br>(20·16, 23·20) | 130     | 19·86<br>(18·26, 21·45) | 130     | 17·26<br>(15·68, 18·84) | 130      | 18·38<br>(16·85, 19·91) |
| Week 4                | 130              | 21·24<br>(19·72, 22·75) | 130     | 20·41<br>(18·82, 22·01) | 130     | 17·59<br>(16·01, 19·17) | 130      | 17·05<br>(15·52, 18·58) |
| Week 8                | 130              | 21·61<br>(20·09, 23·12) | 130     | 20·85<br>(19·25, 22·44) | 130     | 18·97<br>(17·39, 20·55) | 130      | 18·19<br>(16·66, 19·73) |
| Week 12               | 130              | 21·42<br>(19·9, 22·93)  | 130     | 22·93<br>(21·34, 24·52) | 130     | 19·38<br>(17·80, 20·96) | 130      | 18·76<br>(17·23, 20·29) |
| Week 16               | 130              | 23·37<br>(21·85, 24·89) | 130     | 23·04<br>(21·44, 24·63) | 130     | 19·56<br>(17·98, 21·14) | 130      | 19·18<br>(17·65, 20·71) |
| Week 20               | 130              | 22·30<br>(20·79, 23·82) | 130     | 22·82<br>(21·23, 24·41) | 130     | 19·77<br>(18·19, 21·35) | 130      | 17·80<br>(16·27, 19·33) |
| Week 24               | 130              | 21·61<br>(20·10, 23·13) | 130     | 21·79<br>(20·20, 23·38) | 130     | 20·59<br>(19·01, 22·17) | 130      | 18·96<br>(17·43, 20·49) |

Note: CO, carbon monoxide; CS, cigarette substitute; CI, confidence interval. The adjusted model included the following covariates: site, gender, age, race/ethnicity, week 0 exhaled CO, week 0 cigarettes smoked per day, week 0 urinary total NNAL (pg/mg creatinine-transformed), week 0 body mass index, education level, total household income, age of smoking initiation, week 0 waist circumference, week 0 partial INTERHEART non-laboratory score, week 0 Penn State Cigarette Dependence Index score, and week 0 forced expiratory volume in one second.

**Table S40. Estimated mean exhaled carbon monoxide in unadjusted and adjusted mixed models using last-observation-carried-forward method**

| CO, parts per million |     | Unadjusted Model        |         |                         |         |                         |          |                         |
|-----------------------|-----|-------------------------|---------|-------------------------|---------|-------------------------|----------|-------------------------|
| Condition             | CS  |                         | 0 mg/ml |                         | 8 mg/ml |                         | 36 mg/ml |                         |
| Week                  | N   | Estimated Mean (95% CI) | N       | Estimated Mean (95% CI) | N       | Estimated Mean (95% CI) | N        | Estimated Mean (95% CI) |
| Week 0                | 130 | 23.65<br>(21.72, 25.57) | 130     | 23.35<br>(21.43, 25.28) | 130     | 21.84<br>(19.91, 23.76) | 130      | 21.94<br>(20.01, 23.86) |
| Week 1                | 130 | 21.49<br>(19.57, 23.42) | 130     | 20.98<br>(19.06, 22.91) | 130     | 16.67<br>(14.74, 18.59) | 130      | 17.93<br>(16.01, 19.86) |
| Week 2                | 130 | 21.32<br>(19.39, 23.24) | 130     | 20.28<br>(18.36, 22.21) | 130     | 16.07<br>(14.14, 17.99) | 130      | 17.40<br>(15.48, 19.32) |
| Week 4                | 130 | 20.32<br>(18.39, 22.24) | 130     | 20.41<br>(18.48, 22.33) | 130     | 16.23<br>(14.31, 18.16) | 130      | 15.82<br>(13.89, 17.74) |
| Week 8                | 130 | 20.95<br>(19.02, 22.87) | 130     | 20.42<br>(18.50, 22.35) | 130     | 16.47<br>(14.54, 18.39) | 130      | 16.25<br>(14.33, 18.18) |
| Week 12               | 130 | 19.97<br>(18.04, 21.89) | 130     | 21.57<br>(19.64, 23.49) | 130     | 16.92<br>(14.99, 18.84) | 130      | 16.62<br>(14.70, 18.55) |
| Week 16               | 130 | 21.29<br>(19.37, 23.22) | 130     | 22.29<br>(20.37, 24.22) | 130     | 16.73<br>(14.81, 18.66) | 130      | 17.21<br>(15.28, 19.13) |
| Week 20               | 130 | 20.80<br>(18.88, 22.72) | 130     | 21.94<br>(20.01, 23.86) | 130     | 16.74<br>(14.81, 18.66) | 130      | 16.45<br>(14.52, 18.37) |
| Week 24               | 130 | 20.27<br>(18.34, 22.19) | 130     | 21.38<br>(19.46, 23.31) | 130     | 17.48<br>(15.55, 19.40) | 130      | 17.56<br>(15.64, 19.49) |
|                       |     | Adjusted Model          |         |                         |         |                         |          |                         |
| Week 0                | 130 | 23.95<br>(22.32, 25.58) | 130     | 23.30<br>(21.58, 25.01) | 130     | 23.25<br>(21.55, 24.95) | 130      | 23.07<br>(21.43, 24.72) |
| Week 1                | 130 | 21.64<br>(20.01, 23.27) | 130     | 20.31<br>(18.59, 22.02) | 130     | 18.09<br>(16.40, 19.79) | 130      | 18.99<br>(17.34, 20.64) |
| Week 2                | 130 | 21.64<br>(20.01, 23.27) | 130     | 19.54<br>(17.83, 21.25) | 130     | 17.02<br>(15.33, 18.72) | 130      | 18.29<br>(16.64, 19.94) |
| Week 4                | 130 | 20.81<br>(19.18, 22.44) | 130     | 19.79<br>(18.08, 21.51) | 130     | 17.07<br>(15.37, 18.76) | 130      | 17.04<br>(15.39, 18.69) |
| Week 8                | 130 | 21.24<br>(19.61, 22.87) | 130     | 20.13<br>(18.41, 21.84) | 130     | 17.71<br>(16.02, 19.41) | 130      | 17.31<br>(15.66, 18.95) |
| Week 12               | 130 | 20.53<br>(18.90, 22.16) | 130     | 21.42<br>(19.71, 23.14) | 130     | 17.92<br>(16.23, 19.62) | 130      | 17.78<br>(16.14, 19.43) |
| Week 16               | 130 | 22.03<br>(20.40, 23.66) | 130     | 21.85<br>(20.13, 23.56) | 130     | 18.08<br>(16.38, 19.77) | 130      | 17.92<br>(16.27, 19.56) |
| Week 20               | 130 | 21.1<br>(19.47, 22.73)  | 130     | 21.37<br>(19.66, 23.08) | 130     | 18.10<br>(16.41, 19.80) | 130      | 17.03<br>(15.39, 18.68) |
| Week 24               | 130 | 20.71<br>(19.08, 22.34) | 130     | 20.61<br>(18.90, 22.32) | 130     | 18.83<br>(17.13, 20.53) | 130      | 18.13<br>(16.49, 19.78) |

Note: CO, carbon monoxide; CS, cigarette substitute; CI, confidence interval. The adjusted model included the following covariates: site, gender, age, race/ethnicity, week 0 exhaled CO, week 0 cigarettes smoked per day, week 0 urinary total NNAL (pg/mg creatinine-transformed), week 0 body mass index, education level, total household income, age of smoking initiation, week 0 waist circumference, week 0 partial INTERHEART non-laboratory score, week 0 Penn State Cigarette Dependence Index score, and week 0 forced expiratory volume in one second.

**Table S41. P-values for pairwise comparisons between conditions at each time point for exhaled carbon monoxide using multiple imputation method**

| Unadjusted Model* |                   |                   |         |          |
|-------------------|-------------------|-------------------|---------|----------|
| Week 0            |                   |                   |         |          |
|                   | CS                | 0 mg/ml           | 8 mg/ml | 36 mg/ml |
| CS                | ..                |                   |         |          |
| 0 mg/ml           | 0.83              | ..                |         |          |
| 8 mg/ml           | 0.18              | 0.27              | ..      |          |
| 36 mg/ml          | 0.21              | 0.30              | 0.94    | ..       |
| Week 1            |                   |                   |         |          |
| CS                | ..                |                   |         |          |
| 0 mg/ml           | 0.80              | ..                |         |          |
| 8 mg/ml           | 0.0002            | 0.0006            | ..      |          |
| 36 mg/ml          | 0.01 <sup>s</sup> | 0.02              | 0.28    | ..       |
| Week 2            |                   |                   |         |          |
| CS                | ..                |                   |         |          |
| 0 mg/ml           | 0.45              | ..                |         |          |
| 8 mg/ml           | 0.0002            | 0.01 <sup>s</sup> | ..      |          |
| 36 mg/ml          | 0.01              | 0.09              | 0.29    | ..       |
| Week 4            |                   |                   |         |          |
| CS                | ..                |                   |         |          |
| 0 mg/ml           | 0.79              | ..                |         |          |
| 8 mg/ml           | 0.001             | 0.004             | ..      |          |
| 36 mg/ml          | 0.001             | 0.003             | 0.94    | ..       |
| Week 8            |                   |                   |         |          |
| CS                | ..                |                   |         |          |
| 0 mg/ml           | 0.48              | ..                |         |          |
| 8 mg/ml           | 0.001             | 0.02              | ..      |          |
| 36 mg/ml          | 0.001             | 0.02              | 0.86    | ..       |
| Week 12           |                   |                   |         |          |
| CS                | ..                |                   |         |          |
| 0 mg/ml           | 0.49              | ..                |         |          |
| 8 mg/ml           | 0.03              | 0.004             | ..      |          |
| 36 mg/ml          | 0.03              | 0.002             | 0.95    | ..       |
| Week 16           |                   |                   |         |          |
| CS                | ..                |                   |         |          |
| 0 mg/ml           | 0.96              | ..                |         |          |
| 8 mg/ml           | 0.0002            | 0.0004            | ..      |          |
| 36 mg/ml          | 0.003             | 0.0006            | 0.65    | ..       |
| Week 20           |                   |                   |         |          |

|                        |                   |                   |         |          |
|------------------------|-------------------|-------------------|---------|----------|
| CS                     | ..                |                   |         |          |
| 0 mg/ml                | 0.83              | ..                |         |          |
| 8 mg/ml                | 0.01 <sup>S</sup> | 0.003             | ..      |          |
| 36 mg/ml               | 0.0001            | 0.0001            | 0.44    | ..       |
| <b>Week 24</b>         |                   |                   |         |          |
| CS                     | ..                |                   |         |          |
| 0 mg/ml                | 0.73              | ..                |         |          |
| 8 mg/ml                | 0.03              | 0.02              | ..      |          |
| 36 mg/ml               | 0.01 <sup>S</sup> | 0.01 <sup>S</sup> | 0.67    | ..       |
| <b>Adjusted Model*</b> |                   |                   |         |          |
| <b>Week 0</b>          |                   |                   |         |          |
|                        | CS                | 0 mg/ml           | 8 mg/ml | 36 mg/ml |
| CS                     | ..                |                   |         |          |
| 0 mg/ml                | 0.64              | ..                |         |          |
| 8 mg/ml                | 0.37              | 0.67              | ..      |          |
| 36 mg/ml               | 0.42              | 0.73              | 0.94    | ..       |
| <b>Week 1</b>          |                   |                   |         |          |
| CS                     | ..                |                   |         |          |
| 0 mg/ml                | 0.62              | ..                |         |          |
| 8 mg/ml                | 0.0001            | 0.0007            | ..      |          |
| 36 mg/ml               | 0.01              | 0.04              | 0.18    | ..       |
| <b>Week 2</b>          |                   |                   |         |          |
| CS                     | ..                |                   |         |          |
| 0 mg/ml                | 0.30              | ..                |         |          |
| 8 mg/ml                | 0.0001            | 0.02              | ..      |          |
| 36 mg/ml               | 0.01              | 0.22              | 0.19    | ..       |
| <b>Week 4</b>          |                   |                   |         |          |
| CS                     | ..                |                   |         |          |
| 0 mg/ml                | 0.61              | ..                |         |          |
| 8 mg/ml                | 0.001             | 0.01 <sup>S</sup> | ..      |          |
| 36 mg/ml               | 0.001             | 0.01 <sup>S</sup> | 0.92    | ..       |
| <b>Week 8</b>          |                   |                   |         |          |
| CS                     | ..                |                   |         |          |
| 0 mg/ml                | 0.32              | ..                |         |          |
| 8 mg/ml                | 0.001             | 0.05              | ..      |          |
| 36 mg/ml               | 0.0007            | 0.05              | 0.84    | ..       |
| <b>Week 12</b>         |                   |                   |         |          |
| CS                     | ..                |                   |         |          |
| 0 mg/ml                | 0.52              | ..                |         |          |



|                 |                   |                   |      |    |
|-----------------|-------------------|-------------------|------|----|
| <b>8 mg/ml</b>  | 0.06              | 0.01              | ..   |    |
| <b>36 mg/ml</b> | 0.06              | 0.004             | 0.92 | .. |
| <b>Week 16</b>  |                   |                   |      |    |
| <b>CS</b>       | ..                |                   |      |    |
| <b>0 mg/ml</b>  | 0.92              | ..                |      |    |
| <b>8 mg/ml</b>  | 0.0002            | 0.0007            | ..   |    |
| <b>36 mg/ml</b> | 0.003             | 0.0008            | 0.58 | .. |
| <b>Week 20</b>  |                   |                   |      |    |
| <b>CS</b>       | ..                |                   |      |    |
| <b>0 mg/ml</b>  | 0.93              | ..                |      |    |
| <b>8 mg/ml</b>  | 0.01              | 0.01 <sup>S</sup> | ..   |    |
| <b>36 mg/ml</b> | <0.0001           | 0.0002            | 0.35 | .. |
| <b>Week 24</b>  |                   |                   |      |    |
| <b>CS</b>       | ..                |                   |      |    |
| <b>0 mg/ml</b>  | 0.80              | ..                |      |    |
| <b>8 mg/ml</b>  | 0.06              | 0.05              | ..   |    |
| <b>36 mg/ml</b> | 0.01 <sup>S</sup> | 0.02              | 0.59 | .. |

Note: CS, cigarette substitute; CO, carbon monoxide. The adjusted model included the following covariates: site, gender, age, race/ethnicity, week 0 exhaled CO, week 0 cigarettes smoked per day, week 0 urinary total NNAL (pg/mg creatinine-transformed), week 0 body mass index, education level, total household income, age of smoking initiation, week 0 waist circumference, week 0 partial INTERHEART non-laboratory score, week 0 Penn State Cigarette Dependence Index score, and week 0 forced expiratory volume in one second.

\* Bonferroni correction  $\alpha=0.008$ , between all conditions.

S Significant difference between cigarette substitute and 36 mg/ml at week 1 for unadjusted model with  $p=0.007$ ; significant difference between 0 mg/ml and 8 mg/ml at week 2 for unadjusted model with  $p=0.006$ ; significant difference between cigarette substitute and 8 mg/ml at week 20 for unadjusted model with  $p=0.0082$ ; significant difference between cigarette substitute and 36 mg/ml at week 24 for unadjusted model with  $p=0.007$ ; significant difference between 0 mg/ml and 36 mg/ml at week 24 for unadjusted model with  $p=0.0075$ ; significant difference between 0 mg/ml and 8 mg/ml at week 4 for adjusted model with  $p=0.0077$ ; significant difference between 0 mg/ml and 36 mg/ml at week 4 for adjusted model with  $p=0.005$ ; significant difference between 0 mg/ml and 8 mg/ml at week 20 for adjusted model with  $p=0.006$ ; significant difference between cigarette substitute and 36 mg/ml at week 24 for adjusted model with  $p=0.00825$ . All compared to Bonferroni correction  $\alpha=0.05/6=0.00833$ .

**Table S42. P-values for pairwise comparisons between conditions at each time point for exhaled carbon monoxide using intent-to-treat method**

| Unadjusted Model* |                   |                   |         |          |
|-------------------|-------------------|-------------------|---------|----------|
| Week 0            |                   |                   |         |          |
|                   | CS                | 0 mg/ml           | 8 mg/ml | 36 mg/ml |
| CS                | ..                |                   |         |          |
| 0 mg/ml           | 0.83              | ..                |         |          |
| 8 mg/ml           | 0.19              | 0.27              | ..      |          |
| 36 mg/ml          | 0.22              | 0.31              | 0.94    | ..       |
| Week 1            |                   |                   |         |          |
| CS                | ..                |                   |         |          |
| 0 mg/ml           | 0.77              | ..                |         |          |
| 8 mg/ml           | 0.0004            | 0.001             | ..      |          |
| 36 mg/ml          | 0.01              | 0.03              | 0.27    | ..       |
| Week 2            |                   |                   |         |          |
| CS                | ..                |                   |         |          |
| 0 mg/ml           | 0.53              | ..                |         |          |
| 8 mg/ml           | 0.0002            | 0.003             | ..      |          |
| 36 mg/ml          | 0.01 <sup>s</sup> | 0.04              | 0.33    | ..       |
| Week 4            |                   |                   |         |          |
| CS                | ..                |                   |         |          |
| 0 mg/ml           | 0.86              | ..                |         |          |
| 8 mg/ml           | 0.01 <sup>s</sup> | 0.01              | ..      |          |
| 36 mg/ml          | 0.002             | 0.01 <sup>s</sup> | 0.79    | ..       |
| Week 8            |                   |                   |         |          |
| CS                | ..                |                   |         |          |
| 0 mg/ml           | 0.27              | ..                |         |          |
| 8 mg/ml           | 0.001             | 0.04              | ..      |          |
| 36 mg/ml          | 0.002             | 0.06              | 0.83    | ..       |
| Week 12           |                   |                   |         |          |
| CS                | ..                |                   |         |          |
| 0 mg/ml           | 0.45              | ..                |         |          |
| 8 mg/ml           | 0.05              | 0.01              | ..      |          |
| 36 mg/ml          | 0.03              | 0.01 <sup>s</sup> | 0.90    | ..       |
| Week 16           |                   |                   |         |          |
| CS                | ..                |                   |         |          |
| 0 mg/ml           | 0.95              | ..                |         |          |
| 8 mg/ml           | 0.001             | 0.002             | ..      |          |
| 36 mg/ml          | 0.004             | 0.01 <sup>s</sup> | 0.64    | ..       |
| Week 20           |                   |                   |         |          |

|                        |                   |         |         |          |
|------------------------|-------------------|---------|---------|----------|
| CS                     | ..                |         |         |          |
| 0 mg/ml                | 0.87              | ..      |         |          |
| 8 mg/ml                | 0.01 <sup>s</sup> | 0.01    | ..      |          |
| 36 mg/ml               | 0.0004            | 0.001   | 0.48    | ..       |
| <b>Week 24</b>         |                   |         |         |          |
| CS                     | ..                |         |         |          |
| 0 mg/ml                | 0.61              | ..      |         |          |
| 8 mg/ml                | 0.09              | 0.27    | ..      |          |
| 36 mg/ml               | 0.02              | 0.09    | 0.55    | ..       |
| <b>Adjusted Model*</b> |                   |         |         |          |
| <b>Week 0</b>          |                   |         |         |          |
|                        | CS                | 0 mg/ml | 8 mg/ml | 36 mg/ml |
| CS                     | ..                |         |         |          |
| 0 mg/ml                | 0.51              | ..      |         |          |
| 8 mg/ml                | 0.49              | 0.97    | ..      |          |
| 36 mg/ml               | 0.41              | 0.88    | 0.91    | ..       |
| <b>Week 1</b>          |                   |         |         |          |
| CS                     | ..                |         |         |          |
| 0 mg/ml                | 0.19              | ..      |         |          |
| 8 mg/ml                | 0.0008            | 0.05    | ..      |          |
| 36 mg/ml               | 0.02              | 0.38    | 0.25    | ..       |
| <b>Week 2</b>          |                   |         |         |          |
| CS                     | ..                |         |         |          |
| 0 mg/ml                | 0.05              | ..      |         |          |
| 8 mg/ml                | <0.0001           | 0.04    | ..      |          |
| 36 mg/ml               | 0.002             | 0.32    | 0.27    | ..       |
| <b>Week 4</b>          |                   |         |         |          |
| CS                     | ..                |         |         |          |
| 0 mg/ml                | 0.22              | ..      |         |          |
| 8 mg/ml                | 0.0009            | 0.05    | ..      |          |
| 36 mg/ml               | 0.0004            | 0.04    | 0.94    | ..       |
| <b>Week 8</b>          |                   |         |         |          |
| CS                     | ..                |         |         |          |
| 0 mg/ml                | 0.17              | ..      |         |          |
| 8 mg/ml                | 0.003             | 0.13    | ..      |          |
| 36 mg/ml               | 0.001             | 0.09    | 0.86    | ..       |
| <b>Week 12</b>         |                   |         |         |          |
| CS                     | ..                |         |         |          |
| 0 mg/ml                | 0.33              | ..      |         |          |

|                 |                   |         |      |    |
|-----------------|-------------------|---------|------|----|
| <b>8 mg/ml</b>  | 0.04              | 0.004   | ..   |    |
| <b>36 mg/ml</b> | 0.02              | 0.001   | 0.87 | .. |
| <b>Week 16</b>  |                   |         |      |    |
| <b>CS</b>       | ..                |         |      |    |
| <b>0 mg/ml</b>  | 0.73              | ..      |      |    |
| <b>8 mg/ml</b>  | 0.0002            | 0.002   | ..   |    |
| <b>36 mg/ml</b> | <0.0001           | 0.0008  | 0.94 | .. |
| <b>Week 20</b>  |                   |         |      |    |
| <b>CS</b>       | ..                |         |      |    |
| <b>0 mg/ml</b>  | 0.87              | ..      |      |    |
| <b>8 mg/ml</b>  | 0.01              | 0.01    | ..   |    |
| <b>36 mg/ml</b> | <0.0001           | <0.0001 | 0.12 | .. |
| <b>Week 24</b>  |                   |         |      |    |
| <b>CS</b>       | ..                |         |      |    |
| <b>0 mg/ml</b>  | 0.55              | ..      |      |    |
| <b>8 mg/ml</b>  | 0.23              | 0.59    | ..   |    |
| <b>36 mg/ml</b> | 0.01 <sup>S</sup> | 0.05    | 0.16 | .. |

Note: CS, cigarette substitute. The adjusted model included the following covariates: site, gender, age, race/ethnicity, week 0 exhaled CO, week 0 cigarettes smoked per day, week 0 urinary total NNAL (pg/mg creatinine-transformed), week 0 body mass index, education level, total household income, age of smoking initiation, week 0 waist circumference, week 0 partial INTERHEART non-laboratory score, week 0 Penn State Cigarette Dependence Index score, and week 0 forced expiratory volume in one second.

\* Bonferroni correction alpha=0.008, between all conditions.

S Significant difference between cigarette substitute and 36 mg/ml at week 2 for unadjusted model with p=0.007; significant difference between cigarette substitute and 8 mg/ml at week 4 for unadjusted model with p=0.005; significant difference between 0 mg/ml and 36 mg/ml at week 4 for unadjusted model with p=0.005; significant difference between 0 mg/ml and 36 mg/ml at week 12 for unadjusted model with p=0.005; significant difference between 0 mg/ml and 36 mg/ml at week 16 for unadjusted model with p=0.007; significant difference between cigarette substitute and 8 mg/ml at week 20 for unadjusted model with p=0.006; significant difference between cigarette substitute and 36 mg/ml at week 24 for unadjusted model with p=0.005. All compared to Bonferroni correction alpha=0.05/6=0.00833.

**Table S43. P-values for pairwise comparisons between conditions at each time point for exhaled carbon monoxide using per-protocol method**

| <b>Unadjusted Model*</b> |                   |                   |                |                 |
|--------------------------|-------------------|-------------------|----------------|-----------------|
| <b>Week 0</b>            |                   |                   |                |                 |
|                          | <b>CS</b>         | <b>0 mg/ml</b>    | <b>8 mg/ml</b> | <b>36 mg/ml</b> |
| <b>CS</b>                | ..                |                   |                |                 |
| <b>0 mg/ml</b>           | 0.15              | ..                |                |                 |
| <b>8 mg/ml</b>           | 0.30              | 0.69              | ..             |                 |
| <b>36 mg/ml</b>          | 0.26              | 0.72              | 0.96           | ..              |
| <b>Week 1</b>            |                   |                   |                |                 |
| <b>CS</b>                | ..                |                   |                |                 |
| <b>0 mg/ml</b>           | 0.18              | ..                |                |                 |
| <b>8 mg/ml</b>           | 0.0007            | 0.05              | ..             |                 |
| <b>36 mg/ml</b>          | 0.07              | 0.71              | 0.10           | ..              |
| <b>Week 2</b>            |                   |                   |                |                 |
| <b>CS</b>                | ..                |                   |                |                 |
| <b>0 mg/ml</b>           | 0.15              | ..                |                |                 |
| <b>8 mg/ml</b>           | 0.0003            | 0.04              | ..             |                 |
| <b>36 mg/ml</b>          | 0.009             | 0.30              | 0.27           | ..              |
| <b>Week 4</b>            |                   |                   |                |                 |
| <b>CS</b>                | ..                |                   |                |                 |
| <b>0 mg/ml</b>           | 0.42              | ..                |                |                 |
| <b>8 mg/ml</b>           | 0.002             | 0.03              | ..             |                 |
| <b>36 mg/ml</b>          | 0.003             | 0.04              | 0.84           | ..              |
| <b>Week 8</b>            |                   |                   |                |                 |
| <b>CS</b>                | ..                |                   |                |                 |
| <b>0 mg/ml</b>           | 0.10              | ..                |                |                 |
| <b>8 mg/ml</b>           | 0.002             | 0.15              | ..             |                 |
| <b>36 mg/ml</b>          | 0.0008            | 0.12              | 0.92           | ..              |
| <b>Week 12</b>           |                   |                   |                |                 |
| <b>CS</b>                | ..                |                   |                |                 |
| <b>0 mg/ml</b>           | 0.67              | ..                |                |                 |
| <b>8 mg/ml</b>           | 0.04              | 0.02              | ..             |                 |
| <b>36 mg/ml</b>          | 0.01              | 0.004             | 0.66           | ..              |
| <b>Week 16</b>           |                   |                   |                |                 |
| <b>CS</b>                | ..                |                   |                |                 |
| <b>0 mg/ml</b>           | 0.71              | ..                |                |                 |
| <b>8 mg/ml</b>           | 0.001             | 0.01 <sup>S</sup> | ..             |                 |
| <b>36 mg/ml</b>          | 0.0002            | 0.002             | 0.75           | ..              |
| <b>Week 20</b>           |                   |                   |                |                 |
| <b>CS</b>                | ..                |                   |                |                 |
| <b>0 mg/ml</b>           | 0.66              | ..                |                |                 |
| <b>8 mg/ml</b>           | 0.01 <sup>S</sup> | 0.03              | ..             |                 |
| <b>36 mg/ml</b>          | <0.0001           | 0.0004            | 0.17           | ..              |
| <b>Week 24</b>           |                   |                   |                |                 |
| <b>CS</b>                | ..                |                   |                |                 |
| <b>0 mg/ml</b>           | 0.41              | ..                |                |                 |
| <b>8 mg/ml</b>           | 0.07              | 0.36              | ..             |                 |
| <b>36 mg/ml</b>          | 0.003             | 0.05              | 0.29           | ..              |
| <b>Adjusted Model*</b>   |                   |                   |                |                 |
| <b>Week 0</b>            |                   |                   |                |                 |

|                | CS      | 0 mg/ml           | 8 mg/ml | 36 mg/ml |
|----------------|---------|-------------------|---------|----------|
| CS             | ..      |                   |         |          |
| 0 mg/ml        | 0.26    | ..                |         |          |
| 8 mg/ml        | 0.68    | 0.52              | ..      |          |
| 36 mg/ml       | 0.76    | 0.41              | 0.90    | ..       |
| <b>Week 1</b>  |         |                   |         |          |
| CS             | ..      |                   |         |          |
| 0 mg/ml        | 0.13    | ..                |         |          |
| 8 mg/ml        | 0.002   | 0.12              | ..      |          |
| 36 mg/ml       | 0.29    | 0.61              | 0.03    | ..       |
| <b>Week 2</b>  |         |                   |         |          |
| CS             | ..      |                   |         |          |
| 0 mg/ml        | 0.07    | ..                |         |          |
| 8 mg/ml        | 0.0002  | 0.06              | ..      |          |
| 36 mg/ml       | 0.02    | 0.72              | 0.11    | ..       |
| <b>Week 4</b>  |         |                   |         |          |
| CS             | ..      |                   |         |          |
| 0 mg/ml        | 0.40    | ..                |         |          |
| 8 mg/ml        | 0.001   | 0.02              | ..      |          |
| 36 mg/ml       | 0.005   | 0.07              | 0.54    | ..       |
| <b>Week 8</b>  |         |                   |         |          |
| CS             | ..      |                   |         |          |
| 0 mg/ml        | 0.17    | ..                |         |          |
| 8 mg/ml        | 0.01    | 0.25              | ..      |          |
| 36 mg/ml       | 0.002   | 0.13              | 0.79    | ..       |
| <b>Week 12</b> |         |                   |         |          |
| CS             | ..      |                   |         |          |
| 0 mg/ml        | 0.37    | ..                |         |          |
| 8 mg/ml        | 0.08    | 0.02              | ..      |          |
| 36 mg/ml       | 0.01    | 0.001             | 0.56    | ..       |
| <b>Week 16</b> |         |                   |         |          |
| CS             | ..      |                   |         |          |
| 0 mg/ml        | 0.68    | ..                |         |          |
| 8 mg/ml        | 0.0006  | 0.01 <sup>s</sup> | ..      |          |
| 36 mg/ml       | <0.0001 | 0.0006            | 0.70    | ..       |
| <b>Week 20</b> |         |                   |         |          |
| CS             | ..      |                   |         |          |
| 0 mg/ml        | 0.88    | ..                |         |          |
| 8 mg/ml        | 0.03    | 0.05              | ..      |          |
| 36 mg/ml       | <0.0001 | <0.0001           | 0.06    | ..       |
| <b>Week 24</b> |         |                   |         |          |
| CS             | ..      |                   |         |          |
| 0 mg/ml        | 0.34    | ..                |         |          |
| 8 mg/ml        | 0.21    | 0.77              | ..      |          |
| 36 mg/ml       | 0.002   | 0.06              | 0.12    | ..       |

Note: CS, cigarette substitute. The adjusted model included the following covariates: site, gender, age, race/ethnicity, week 0 exhaled CO, week 0 cigarettes smoked per day, week 0 urinary total NNAL (pg/mg creatinine-transformed), week 0 body mass index, education level, total household income, age of smoking initiation, week 0 waist circumference, week 0 partial INTERHEART non-laboratory score, week 0 Penn State Cigarette Dependence Index score, and week 0 forced expiratory volume in one second.

\* Bonferroni correction alpha=0.008, between all conditions.

S Significant difference between 0 mg/ml and 8 mg/ml at week 16 for unadjusted model with  $p=0.007$ ; significant difference between cigarette substitute and 8 mg/ml at week 20 for unadjusted model with  $p=0.007$ ; significant difference between 0 mg/ml and 8 mg/ml at week 16 for adjusted model with  $p=0.005$ . All compared to Bonferroni correction  $\alpha=0.05/6=0.00833$ .

**Table S44. P-values for pairwise comparisons between conditions at each time point for exhaled carbon monoxide using baseline-carried-forward method**

| Unadjusted Model* |                   |                   |         |          |
|-------------------|-------------------|-------------------|---------|----------|
| Week 0            |                   |                   |         |          |
|                   | CS                | 0 mg/ml           | 8 mg/ml | 36 mg/ml |
| CS                | ..                |                   |         |          |
| 0 mg/ml           | 0.84              | ..                |         |          |
| 8 mg/ml           | 0.20              | 0.29              | ..      |          |
| 36 mg/ml          | 0.23              | 0.32              | 0.94    | ..       |
| Week 1            |                   |                   |         |          |
| CS                | ..                |                   |         |          |
| 0 mg/ml           | 0.72              | ..                |         |          |
| 8 mg/ml           | 0.0007            | 0.002             | ..      |          |
| 36 mg/ml          | 0.01              | 0.03              | 0.38    | ..       |
| Week 2            |                   |                   |         |          |
| CS                | ..                |                   |         |          |
| 0 mg/ml           | 0.53              | ..                |         |          |
| 8 mg/ml           | 0.0003            | 0.003             | ..      |          |
| 36 mg/ml          | 0.004             | 0.03              | 0.44    | ..       |
| Week 4            |                   |                   |         |          |
| CS                | ..                |                   |         |          |
| 0 mg/ml           | 0.85              | ..                |         |          |
| 8 mg/ml           | 0.003             | 0.002             | ..      |          |
| 36 mg/ml          | 0.0004            | 0.0002            | 0.54    | ..       |
| Week 8            |                   |                   |         |          |
| CS                | ..                |                   |         |          |
| 0 mg/ml           | 0.78              | ..                |         |          |
| 8 mg/ml           | 0.01 <sup>S</sup> | 0.01              | ..      |          |
| 36 mg/ml          | 0.002             | 0.01 <sup>S</sup> | 0.79    | ..       |
| Week 12           |                   |                   |         |          |
| CS                | ..                |                   |         |          |
| 0 mg/ml           | 0.17              | ..                |         |          |
| 8 mg/ml           | 0.04              | 0.0006            | ..      |          |
| 36 mg/ml          | 0.02              | 0.0001            | 0.71    | ..       |



| <b>Week 16</b>         |                   |                |                |                 |
|------------------------|-------------------|----------------|----------------|-----------------|
| CS                     | ..                |                |                |                 |
| 0 mg/ml                | 0.74              | ..             |                |                 |
| 8 mg/ml                | 0.0004            | 0.0001         | ..             |                 |
| 36 mg/ml               | 0.001             | 0.0003         | 0.80           | ..              |
| <b>Week 20</b>         |                   |                |                |                 |
| CS                     | ..                |                |                |                 |
| 0 mg/ml                | 0.55              | ..             |                |                 |
| 8 mg/ml                | 0.01 <sup>s</sup> | 0.001          | ..             |                 |
| 36 mg/ml               | 0.0002            | <0.0001        | 0.32           | ..              |
| <b>Week 24</b>         |                   |                |                |                 |
| CS                     | ..                |                |                |                 |
| 0 mg/ml                | 0.45              | ..             |                |                 |
| 8 mg/ml                | 0.11              | 0.02           | ..             |                 |
| 36 mg/ml               | 0.02              | 0.002          | 0.47           | ..              |
| <b>Adjusted Model*</b> |                   |                |                |                 |
| <b>Week 0</b>          |                   |                |                |                 |
|                        | <b>CS</b>         | <b>0 mg/ml</b> | <b>8 mg/ml</b> | <b>36 mg/ml</b> |
| CS                     | ..                |                |                |                 |
| 0 mg/ml                | 0.55              | ..             |                |                 |
| 8 mg/ml                | 0.56              | 0.98           | ..             |                 |
| 36 mg/ml               | 0.53              | 0.99           | 0.97           | ..              |
| <b>Week 1</b>          |                   |                |                |                 |
| CS                     | ..                |                |                |                 |
| 0 mg/ml                | 0.21              | ..             |                |                 |
| 8 mg/ml                | 0.0009            | 0.05           | ..             |                 |
| 36 mg/ml               | 0.02              | 0.29           | 0.32           | ..              |
| <b>Week 2</b>          |                   |                |                |                 |
| CS                     | ..                |                |                |                 |
| 0 mg/ml                | 0.08              | ..             |                |                 |
| 8 mg/ml                | <0.0001           | 0.02           | ..             |                 |
| 36 mg/ml               | 0.001             | 0.16           | 0.29           | ..              |
| <b>Week 4</b>          |                   |                |                |                 |
| CS                     | ..                |                |                |                 |

|                |         |                   |      |    |
|----------------|---------|-------------------|------|----|
| 0 mg/ml        | 0.43    | ..                |      |    |
| 8 mg/ml        | 0.0005  | 0.01 <sup>S</sup> | ..   |    |
| 36 mg/ml       | <0.0001 | 0.001             | 0.61 | .. |
| <b>Week 8</b>  |         |                   |      |    |
| CS             | ..      |                   |      |    |
| 0 mg/ml        | 0.46    | ..                |      |    |
| 8 mg/ml        | 0.01    | 0.08              | ..   |    |
| 36 mg/ml       | 0.0008  | 0.01              | 0.46 | .. |
| <b>Week 12</b> |         |                   |      |    |
| CS             | ..      |                   |      |    |
| 0 mg/ml        | 0.15    | ..                |      |    |
| 8 mg/ml        | 0.05    | 0.0009            | ..   |    |
| 36 mg/ml       | 0.01    | <0.0001           | 0.55 | .. |
| <b>Week 16</b> |         |                   |      |    |
| CS             | ..      |                   |      |    |
| 0 mg/ml        | 0.75    | ..                |      |    |
| 8 mg/ml        | 0.0003  | 0.001             | ..   |    |
| 36 mg/ml       | <0.0001 | 0.0002            | 0.71 | .. |
| <b>Week 20</b> |         |                   |      |    |
| CS             | ..      |                   |      |    |
| 0 mg/ml        | 0.62    | ..                |      |    |
| 8 mg/ml        | 0.02    | 0.004             | ..   |    |
| 36 mg/ml       | <0.0001 | <0.0001           | 0.06 | .. |
| <b>Week 24</b> |         |                   |      |    |
| CS             | ..      |                   |      |    |
| 0 mg/ml        | 0.86    | ..                |      |    |
| 8 mg/ml        | 0.32    | 0.26              | ..   |    |
| 36 mg/ml       | 0.01    | 0.01 <sup>S</sup> | 0.12 | .. |

Note: CS, cigarette substitute. The adjusted model included the following covariates: site, gender, age, race/ethnicity, week 0 exhaled CO, week 0 cigarettes smoked per day, week 0 urinary total NNAL (pg/mg creatinine-transformed), week 0 body mass index, education level, total household income, age of smoking initiation, week 0 waist circumference, week 0 partial INTERHEART non-laboratory score, week 0 Penn State Cigarette Dependence Index score, and week 0 forced expiratory volume in one second.

\* Bonferroni correction  $\alpha=0.008$ , between all conditions.

S Significant difference between cigarette substitute and 8 mg/ml at week 8 for unadjusted model with  $p=0.005$ ; significant difference between 0 mg/ml and 36 mg/ml at week 8 for unadjusted model with  $p=0.005$ ; significant difference between cigarette substitute and 8 mg/ml at week 20 for unadjusted model with  $p=0.007$ ; significant difference between 0 mg/ml and 8 mg/ml at week 4 for adjusted model with  $p=0.0081$ ; significant difference between 0 mg/ml and 36 mg/ml at week 24 for adjusted model with  $p=0.007$ , comparing to Bonferroni correction  $\alpha=0.05/6=0.0083$ .

**Table S45. P-values for pairwise comparisons between conditions at each time point for exhaled carbon monoxide using last-observation-carried-forward method**

| <b>Unadjusted Model*</b> |                   |                   |                |                 |
|--------------------------|-------------------|-------------------|----------------|-----------------|
| <b>Week 0</b>            |                   |                   |                |                 |
|                          | <b>CS</b>         | <b>0 mg/ml</b>    | <b>8 mg/ml</b> | <b>36 mg/ml</b> |
| <b>CS</b>                | ..                |                   |                |                 |
| <b>0 mg/ml</b>           | 0.83              | ..                |                |                 |
| <b>8 mg/ml</b>           | 0.19              | 0.28              | ..             |                 |
| <b>36 mg/ml</b>          | 0.22              | 0.31              | 0.94           | ..              |
| <b>Week 1</b>            |                   |                   |                |                 |
| <b>CS</b>                | ..                |                   |                |                 |
| <b>0 mg/ml</b>           | 0.71              | ..                |                |                 |
| <b>8 mg/ml</b>           | 0.0005            | 0.002             | ..             |                 |
| <b>36 mg/ml</b>          | 0.01              | 0.03              | 0.36           | ..              |
| <b>Week 2</b>            |                   |                   |                |                 |
| <b>CS</b>                | ..                |                   |                |                 |
| <b>0 mg/ml</b>           | 0.46              | ..                |                |                 |
| <b>8 mg/ml</b>           | 0.0002            | 0.002             | ..             |                 |
| <b>36 mg/ml</b>          | 0.01 <sup>S</sup> | 0.04              | 0.34           | ..              |
| <b>Week 4</b>            |                   |                   |                |                 |
| <b>CS</b>                | ..                |                   |                |                 |
| <b>0 mg/ml</b>           | 0.95              | ..                |                |                 |
| <b>8 mg/ml</b>           | 0.003             | 0.003             | ..             |                 |
| <b>36 mg/ml</b>          | 0.001             | 0.001             | 0.76           | ..              |
| <b>Week 8</b>            |                   |                   |                |                 |
| <b>CS</b>                | ..                |                   |                |                 |
| <b>0 mg/ml</b>           | 0.71              | ..                |                |                 |
| <b>8 mg/ml</b>           | 0.001             | 0.004             | ..             |                 |
| <b>36 mg/ml</b>          | 0.0007            | 0.003             | 0.88           | ..              |
| <b>Week 12</b>           |                   |                   |                |                 |
| <b>CS</b>                | ..                |                   |                |                 |
| <b>0 mg/ml</b>           | 0.25              | ..                |                |                 |
| <b>8 mg/ml</b>           | 0.03              | 0.0008            | ..             |                 |
| <b>36 mg/ml</b>          | 0.02              | 0.0004            | 0.83           | ..              |
| <b>Week 16</b>           |                   |                   |                |                 |
| <b>CS</b>                | ..                |                   |                |                 |
| <b>0 mg/ml</b>           | 0.47              | ..                |                |                 |
| <b>8 mg/ml</b>           | 0.001             | <0.0001           | ..             |                 |
| <b>36 mg/ml</b>          | 0.003             | 0.0003            | 0.73           | ..              |
| <b>Week 20</b>           |                   |                   |                |                 |
| <b>CS</b>                | ..                |                   |                |                 |
| <b>0 mg/ml</b>           | 0.41              | ..                |                |                 |
| <b>8 mg/ml</b>           | 0.003             | 0.0002            | ..             |                 |
| <b>36 mg/ml</b>          | 0.002             | <0.0001           | 0.83           | ..              |
| <b>Week 24</b>           |                   |                   |                |                 |
| <b>CS</b>                | ..                |                   |                |                 |
| <b>0 mg/ml</b>           | 0.42              | ..                |                |                 |
| <b>8 mg/ml</b>           | 0.04              | 0.01 <sup>S</sup> | ..             |                 |
| <b>36 mg/ml</b>          | 0.05              | 0.01 <sup>S</sup> | 0.95           | ..              |
| <b>Adjusted Model*</b>   |                   |                   |                |                 |
| <b>Week 0</b>            |                   |                   |                |                 |
|                          | <b>CS</b>         | <b>0 mg/ml</b>    | <b>8 mg/ml</b> | <b>36 mg/ml</b> |

|                |                   |         |      |    |
|----------------|-------------------|---------|------|----|
| CS             | ..                |         |      |    |
| 0 mg/ml        | 0.55              | ..      |      |    |
| 8 mg/ml        | 0.53              | 0.97    | ..   |    |
| 36 mg/ml       | 0.42              | 0.84    | 0.87 | .. |
| <b>Week 1</b>  |                   |         |      |    |
| CS             | ..                |         |      |    |
| 0 mg/ml        | 0.22              | ..      |      |    |
| 8 mg/ml        | 0.001             | 0.05    | ..   |    |
| 36 mg/ml       | 0.01              | 0.23    | 0.42 | .. |
| <b>Week 2</b>  |                   |         |      |    |
| CS             | ..                |         |      |    |
| 0 mg/ml        | 0.06              | ..      |      |    |
| 8 mg/ml        | <0.0001           | 0.03    | ..   |    |
| 36 mg/ml       | 0.002             | 0.26    | 0.25 | .. |
| <b>Week 4</b>  |                   |         |      |    |
| CS             | ..                |         |      |    |
| 0 mg/ml        | 0.36              | ..      |      |    |
| 8 mg/ml        | 0.0007            | 0.02    | ..   |    |
| 36 mg/ml       | 0.0005            | 0.01    | 0.98 | .. |
| <b>Week 8</b>  |                   |         |      |    |
| CS             | ..                |         |      |    |
| 0 mg/ml        | 0.31              | ..      |      |    |
| 8 mg/ml        | 0.001             | 0.03    | ..   |    |
| 36 mg/ml       | 0.0003            | 0.01    | 0.71 | .. |
| <b>Week 12</b> |                   |         |      |    |
| CS             | ..                |         |      |    |
| 0 mg/ml        | 0.41              | ..      |      |    |
| 8 mg/ml        | 0.02              | 0.002   | ..   |    |
| 36 mg/ml       | 0.01              | 0.001   | 0.90 | .. |
| <b>Week 16</b> |                   |         |      |    |
| CS             | ..                |         |      |    |
| 0 mg/ml        | 0.87              | ..      |      |    |
| 8 mg/ml        | 0.0003            | 0.0008  | ..   |    |
| 36 mg/ml       | 0.0001            | 0.0004  | 0.88 | .. |
| <b>Week 20</b> |                   |         |      |    |
| CS             | ..                |         |      |    |
| 0 mg/ml        | 0.81              | ..      |      |    |
| 8 mg/ml        | 0.01 <sup>s</sup> | 0.004   | ..   |    |
| 36 mg/ml       | 0.0002            | <0.0001 | 0.33 | .. |
| <b>Week 24</b> |                   |         |      |    |
| CS             | ..                |         |      |    |
| 0 mg/ml        | 0.93              | ..      |      |    |
| 8 mg/ml        | 0.09              | 0.11    | ..   |    |
| 36 mg/ml       | 0.02              | 0.03    | 0.53 | .. |

Note: CS, cigarette substitute. The adjusted model included the following covariates: site, gender, age, race/ethnicity, week 0 exhaled CO, week 0 cigarettes smoked per day, week 0 urinary total NNAL (pg/mg creatinine-transformed), week 0 body mass index, education level, total household income, age of smoking initiation, week 0 waist circumference, week 0 partial INTERHEART non-laboratory score, week 0 Penn State Cigarette Dependence Index score, and week 0 forced expiratory volume in one second.

\* Bonferroni correction alpha=0.008, between all conditions.

S Significant difference between cigarette substitute and 36 mg/ml at week 2 for unadjusted model with  $p=0.005$ ; significant difference between 0 mg/ml and 8 mg/ml at week 24 for unadjusted model with  $p=0.005$ ; significant difference between 0 mg/ml and 36 mg/ml at week 24 for unadjusted model with  $p=0.006$ ; significant difference between cigarette substitute and 8 mg/ml at week 20 for adjusted model with  $p=0.007$ , comparing to Bonferroni correction  $\alpha=0.05/6=0.0083$ .

**Table S46. P-values for pairwise comparisons relative to baseline within each condition for exhaled carbon monoxide using multiple imputation method**

| Unadjusted Model* |       |                   |         |          |
|-------------------|-------|-------------------|---------|----------|
|                   | CS    | 0 mg/ml           | 8 mg/ml | 36 mg/ml |
| Week 1            | 0.01  | 0.02              | <0.0001 | <0.0001  |
| Week 2            | 0.03  | 0.01 <sup>s</sup> | <0.0001 | <0.0001  |
| Week 4            | 0.01  | 0.01              | <0.0001 | <0.0001  |
| Week 8            | 0.04  | 0.02              | <0.0001 | <0.001   |
| Week 12           | 0.01  | 0.16              | 0.0001  | 0.0001   |
| Week 16           | 0.18  | 0.30              | 0.0002  | 0.0009   |
| Week 20           | 0.03  | 0.12              | 0.0009  | <0.0001  |
| Week 24           | 0.05  | 0.15              | 0.01    | 0.002    |
| Adjusted Model*   |       |                   |         |          |
|                   | CS    | 0 mg/ml           | 8 mg/ml | 36 mg/ml |
| Week 1            | 0.01  | 0.01              | <0.0001 | <0.0001  |
| Week 2            | 0.02  | 0.003             | <0.0001 | <0.0001  |
| Week 4            | 0.004 | 0.002             | <0.0001 | <0.0001  |
| Week 8            | 0.02  | 0.01              | <0.0001 | <0.0001  |
| Week 12           | 0.004 | 0.10              | <0.0001 | <0.0001  |
| Week 16           | 0.09  | 0.21              | <0.0001 | <0.0001  |
| Week 20           | 0.01  | 0.06              | 0.0002  | <0.0001  |
| Week 24           | 0.02  | 0.07              | 0.003   | 0.001    |

Note: CS, cigarette substitute. The adjusted model included the following covariates: site, gender, age, race/ethnicity, week 0 exhaled CO, week 0 cigarettes smoked per day, week 0 urinary total NNAL (pg/mg creatinine-transformed), week 0 body mass index, education level, total household income, age of smoking initiation, week 0 waist circumference, week 0 partial INTERHEART non-laboratory score, week 0 Penn State Cigarette Dependence Index score, and week 0 forced expiratory volume in one second.

\* Bonferroni correction alpha=0.006, relative to baseline (week 0).

<sup>s</sup> Significant difference between week 0 and week 2 in 0 mg/ml for unadjusted model with p=0.00623, comparing to Bonferroni correction alpha=0.05/8=0.00625.

**Table S47. P-values for pairwise comparisons relative to baseline within each condition for exhaled carbon monoxide using intent-to-treat method**

| Unadjusted Model* |                   |         |                   |          |
|-------------------|-------------------|---------|-------------------|----------|
|                   | CS                | 0 mg/ml | 8 mg/ml           | 36 mg/ml |
| Week 1            | 0.004             | 0.003   | <0.0001           | <0.0001  |
| Week 2            | 0.02              | 0.004   | <0.0001           | <0.0001  |
| Week 4            | 0.002             | 0.004   | <0.0001           | <0.0001  |
| Week 8            | 0.05              | 0.004   | <0.0001           | <0.0001  |
| Week 12           | 0.01 <sup>S</sup> | 0.11    | 0.0003            | <0.0001  |
| Week 16           | 0.19              | 0.26    | 0.0002            | 0.0008   |
| Week 20           | 0.06              | 0.09    | 0.0002            | <0.0001  |
| Week 24           | 0.03              | 0.02    | 0.01 <sup>S</sup> | 0.0004   |
| Adjusted Model*   |                   |         |                   |          |
|                   | CS                | 0 mg/ml | 8 mg/ml           | 36 mg/ml |
| Week 1            | 0.002             | 0.0002  | <0.0001           | <0.0001  |
| Week 2            | 0.02              | 0.0003  | <0.0001           | <0.0001  |
| Week 4            | 0.003             | 0.0007  | <0.0001           | <0.0001  |
| Week 8            | 0.02              | 0.003   | <0.0001           | <0.0001  |
| Week 12           | 0.003             | 0.28    | <0.0001           | <0.0001  |
| Week 16           | 0.32              | 0.47    | <0.0001           | <0.0001  |
| Week 20           | 0.02              | 0.19    | <0.0001           | <0.0001  |
| Week 24           | 0.01              | 0.02    | 0.002             | <0.0001  |

Note: CS, cigarette substitute. The adjusted model included the following covariates: site, gender, age, race/ethnicity, week 0 exhaled CO, week 0 cigarettes smoked per day, week 0 urinary total NNAL (pg/mg creatinine-transformed), week 0 body mass index, education level, total household income, age of smoking initiation, week 0 waist circumference, week 0 partial INTERHEART non-laboratory score, week 0 Penn State Cigarette Dependence Index score, and week 0 forced expiratory volume in one second.

\* Bonferroni correction alpha=0.006, relative to baseline (week 0).

S Significant difference between week 0 and week 12 in cigarette substitute condition for unadjusted model with p=0.0057; significant difference between week 0 and week 24 in 8 mg/ml condition for unadjusted model with p=0.0057, comparing to Bonferroni correction alpha=0.05/8=0.0063.

**Table S48. P-values for pairwise comparisons relative to baseline within each condition for exhaled carbon monoxide using per-protocol method**

| Unadjusted Model* |      |         |         |          |
|-------------------|------|---------|---------|----------|
|                   | CS   | 0 mg/ml | 8 mg/ml | 36 mg/ml |
| Week 1            | 0.04 | 0.10    | <0.0001 | 0.002    |
| Week 2            | 0.15 | 0.19    | <0.0001 | 0.0009   |
| Week 4            | 0.01 | 0.15    | <0.0001 | <0.0001  |
| Week 8            | 0.12 | 0.11    | 0.0003  | <0.0001  |
| Week 12           | 0.01 | 0.78    | 0.001   | <0.0001  |
| Week 16           | 0.20 | 0.93    | 0.0009  | <0.0001  |
| Week 20           | 0.12 | 0.68    | 0.002   | <0.0001  |
| Week 24           | 0.08 | 0.34    | 0.02    | 0.0004   |
| Adjusted Model*   |      |         |         |          |
|                   | CS   | 0 mg/ml | 8 mg/ml | 36 mg/ml |
| Week 1            | 0.03 | 0.02    | <0.0001 | 0.002    |
| Week 2            | 0.14 | 0.05    | <0.0001 | 0.0002   |
| Week 4            | 0.02 | 0.07    | <0.0001 | <0.0001  |
| Week 8            | 0.08 | 0.07    | 0.0003  | <0.0001  |
| Week 12           | 0.01 | 0.81    | 0.0008  | <0.0001  |
| Week 16           | 0.36 | 0.90    | 0.0003  | <0.0001  |
| Week 20           | 0.08 | 0.55    | 0.001   | <0.0001  |
| Week 24           | 0.06 | 0.15    | 0.02    | <0.0001  |

Note: CS, cigarette substitute. The adjusted model included the following covariates: site, gender, age, race/ethnicity, week 0 exhaled CO, week 0 cigarettes smoked per day, week 0 urinary total NNAL (pg/mg creatinine-transformed), week 0 body mass index, education level, total household income, age of smoking initiation, week 0 waist circumference, week 0 partial INTERHEART non-laboratory score, week 0 Penn State Cigarette Dependence Index score, and week 0 forced expiratory volume in one second.

\* Bonferroni correction alpha=0.006, relative to baseline (week 0).



**Table S49. P-values for pairwise comparisons relative to baseline within each condition for exhaled CO using baseline-carried-forward method**

| Unadjusted Model* |       |         |         |                   |
|-------------------|-------|---------|---------|-------------------|
|                   | CS    | 0 mg/ml | 8 mg/ml | 36 mg/ml          |
| Week 1            | 0.004 | 0.001   | <0.0001 | <0.0001           |
| Week 2            | 0.04  | 0.01    | <0.0001 | <0.0001           |
| Week 4            | 0.02  | 0.06    | <0.0001 | <0.0001           |
| Week 8            | 0.08  | 0.07    | 0.0003  | <0.0001           |
| Week 12           | 0.04  | 0.78    | 0.003   | 0.0006            |
| Week 16           | 0.66  | 0.88    | 0.004   | 0.01              |
| Week 20           | 0.28  | 0.81    | 0.01    | 0.0002            |
| Week 24           | 0.10  | 0.51    | 0.05    | 0.01 <sup>S</sup> |
| Adjusted Model*   |       |         |         |                   |
|                   | CS    | 0 mg/ml | 8 mg/ml | 36 mg/ml          |
| Week 1            | 0.002 | 0.0001  | <0.0001 | <0.0001           |
| Week 2            | 0.03  | 0.0007  | <0.0001 | <0.0001           |
| Week 4            | 0.01  | 0.01    | <0.0001 | <0.0001           |
| Week 8            | 0.04  | 0.03    | <0.0001 | <0.0001           |
| Week 12           | 0.02  | 0.90    | 0.0004  | <0.0001           |
| Week 16           | 0.75  | 0.98    | 0.0009  | 0.0001            |
| Week 20           | 0.17  | 0.82    | 0.002   | <0.0001           |
| Week 24           | 0.04  | 0.23    | 0.02    | <0.0001           |

Note: CS, cigarette substitute. The adjusted model included the following covariates: site, gender, age, race/ethnicity, week 0 exhaled CO, week 0 cigarettes smoked per day, week 0 urinary total NNAL (pg/mg creatinine-transformed), week 0 body mass index, education level, total household income, age of smoking initiation, week 0 waist circumference, week 0 partial INTERHEART non-laboratory score, week 0 Penn State Cigarette Dependence Index score, and week 0 forced expiratory volume in one second.

\* Bonferroni correction alpha=0.006, relative to baseline (week 0).

S Significant difference between week 0 and week 24 in 36 mg/ml condition for unadjusted model with p=0.005, comparing to Bonferroni correction alpha=0.05/8=0.0063.

**Table S50. P-values for pairwise comparisons relative to baseline within each condition for exhaled carbon monoxide using last-observation-carried-forward method**

| Unadjusted Model* |       |                   |         |          |
|-------------------|-------|-------------------|---------|----------|
|                   | CS    | 0 mg/ml           | 8 mg/ml | 36 mg/ml |
| Week 1            | 0.002 | 0.0007            | <0.0001 | <0.0001  |
| Week 2            | 0.01  | 0.0009            | <0.0001 | <0.0001  |
| Week 4            | 0.002 | 0.01 <sup>S</sup> | <0.0001 | <0.0001  |
| Week 8            | 0.02  | 0.01              | <0.0001 | <0.0001  |
| Week 12           | 0.003 | 0.14              | <0.0001 | <0.0001  |
| Week 16           | 0.06  | 0.40              | <0.0001 | 0.0002   |
| Week 20           | 0.03  | 0.27              | <0.0001 | <0.0001  |
| Week 24           | 0.01  | 0.14              | 0.001   | 0.001    |
| Adjusted Model*   |       |                   |         |          |
|                   | CS    | 0 mg/ml           | 8 mg/ml | 36 mg/ml |
| Week 1            | 0.001 | <0.0001           | <0.0001 | <0.0001  |
| Week 2            | 0.01  | <0.0001           | <0.0001 | <0.0001  |
| Week 4            | 0.001 | 0.0005            | <0.0001 | <0.0001  |
| Week 8            | 0.01  | 0.003             | <0.0001 | <0.0001  |
| Week 12           | 0.001 | 0.08              | <0.0001 | <0.0001  |
| Week 16           | 0.07  | 0.19              | <0.0001 | <0.0001  |
| Week 20           | 0.01  | 0.08              | <0.0001 | <0.0001  |
| Week 24           | 0.002 | 0.02              | <0.0001 | <0.0001  |

Note: CS, cigarette substitute. The adjusted model included the following covariates: site, gender, age, race/ethnicity, week 0 exhaled CO, week 0 cigarettes smoked per day, week 0 urinary total NNAL (pg/mg creatinine-transformed), week 0 body mass index, education level, total household income, age of smoking initiation, week 0 waist circumference, week 0 partial INTERHEART non-laboratory score, week 0 Penn State Cigarette Dependence Index score, and week 0 forced expiratory volume in one second.

\* Bonferroni correction alpha=0.006, relative to baseline (week 0).

S Significant difference between week 0 and week 4 in 0 mg/ml condition for unadjusted model with p=0.005; comparing to Bonferroni correction alpha=0.05/8=0.0063.

**Table S51. Estimated mean cigarettes smoked per day in unadjusted and adjusted mixed models using multiple imputation method**

| CPD       | Unadjusted Model |                         |         |                         |         |                         |          |                         |  |
|-----------|------------------|-------------------------|---------|-------------------------|---------|-------------------------|----------|-------------------------|--|
| Condition | CS               |                         | 0 mg/ml |                         | 8 mg/ml |                         | 36 mg/ml |                         |  |
| Week      | N                | Estimated Mean (95% CI) | N       | Estimated Mean (95% CI) | N       | Estimated Mean (95% CI) | N        | Estimated Mean (95% CI) |  |
| Week 0    | 130              | 18.37<br>(17.15, 19.59) | 130     | 18.79<br>(17.57, 20.01) | 130     | 19.45<br>(18.23, 20.67) | 130      | 17.76<br>(16.54, 18.98) |  |
| Week 1    | 130              | 15.37<br>(14.13, 16.60) | 130     | 13.39<br>(12.13, 14.66) | 130     | 13.11<br>(11.88, 14.34) | 130      | 12.02<br>(10.78, 13.26) |  |
| Week 2    | 130              | 14.58<br>(13.26, 15.90) | 130     | 12.15<br>(10.89, 13.4)  | 130     | 12.35<br>(11.07, 13.64) | 130      | 10.87<br>(9.60, 12.14)  |  |
| Week 4    | 130              | 13.26<br>(12.03, 14.50) | 130     | 10.53<br>(9.24, 11.82)  | 130     | 10.41<br>(9.11, 11.71)  | 130      | 9.38<br>(8.13, 10.63)   |  |
| Week 8    | 130              | 12.77<br>(11.37, 14.17) | 130     | 10.16<br>(8.84, 11.48)  | 130     | 10.47<br>(9.22, 11.73)  | 130      | 9.02<br>(7.66, 10.39)   |  |
| Week 12   | 130              | 12.03<br>(10.74, 13.32) | 130     | 9.95<br>(8.65, 11.24)   | 130     | 9.75<br>(8.15, 11.36)   | 130      | 8.10<br>(6.77, 9.42)    |  |
| Week 16   | 130              | 11.77<br>(10.46, 13.08) | 130     | 9.26<br>(7.92, 10.60)   | 130     | 9.69<br>(8.38, 11.00)   | 130      | 7.38<br>(5.93, 8.83)    |  |
| Week 20   | 130              | 11.30<br>(10.05, 12.54) | 130     | 9.35<br>(7.71, 10.99)   | 130     | 9.27<br>(7.99, 10.54)   | 130      | 7.30<br>(5.99, 8.60)    |  |
| Week 24   | 130              | 11.23<br>(9.76, 12.71)  | 130     | 9.21<br>(7.89, 10.53)   | 130     | 9.12<br>(7.61, 10.64)   | 130      | 7.43<br>(6.14, 8.71)    |  |
|           |                  | <b>Adjusted Model</b>   |         |                         |         |                         |          |                         |  |
| Week 0    | 130              | 17.90<br>(16.98, 18.82) | 130     | 17.93<br>(16.99, 18.86) | 130     | 18.49<br>(17.56, 19.42) | 130      | 17.66<br>(16.73, 18.59) |  |
| Week 1    | 130              | 14.90<br>(13.97, 15.82) | 130     | 12.53<br>(11.56, 13.51) | 130     | 12.15<br>(11.21, 13.10) | 130      | 11.92<br>(10.95, 12.89) |  |
| Week 2    | 130              | 14.11<br>(13.06, 15.15) | 130     | 11.29<br>(10.32, 12.25) | 130     | 11.39<br>(10.41, 12.38) | 130      | 10.77<br>(9.77, 11.77)  |  |
| Week 4    | 130              | 12.79<br>(11.85, 13.74) | 130     | 9.67<br>(8.64, 10.71)   | 130     | 9.45<br>(8.48, 10.42)   | 130      | 9.28<br>(8.32, 10.24)   |  |
| Week 8    | 130              | 12.30<br>(11.11, 13.48) | 130     | 9.30<br>(8.22, 10.37)   | 130     | 9.51<br>(8.56, 10.47)   | 130      | 8.93<br>(7.77, 10.08)   |  |
| Week 12   | 130              | 11.56<br>(10.59, 12.53) | 130     | 9.09<br>(8.06, 10.12)   | 130     | 8.79<br>(7.37, 10.22)   | 130      | 8.00<br>(6.99, 9.01)    |  |
| Week 16   | 130              | 11.30<br>(10.25, 12.35) | 130     | 8.40<br>(7.29, 9.50)    | 130     | 8.73<br>(7.67, 9.80)    | 130      | 7.28<br>(6.05, 8.52)    |  |
| Week 20   | 130              | 10.83<br>(9.88, 11.78)  | 130     | 8.49<br>(7.02, 9.96)    | 130     | 8.31<br>(7.32, 9.29)    | 130      | 7.20<br>(6.18, 8.22)    |  |
| Week 24   | 130              | 10.77<br>(9.53, 12.00)  | 130     | 8.35<br>(7.28, 9.42)    | 130     | 8.16<br>(6.79, 9.53)    | 130      | 7.33<br>(6.31, 8.35)    |  |

Note: CPD, cigarettes smoked per day; CS, cigarette substitute; CI, confidence interval. The adjusted model included the following covariates: site, gender, age, race/ethnicity, week 0 exhaled CO, week 0 cigarettes smoked per day, education level, week 0 Kessler K6 score, week 0 Penn State Cigarette Dependence Index score, and week 0 forced expiratory volume in one second.

**Table S52. Estimated mean cigarettes smoked per day in unadjusted and adjusted mixed models using intent-to-treat method**

| CPD       | Unadjusted Model      |                         |         |                         |         |                         |          |                         |
|-----------|-----------------------|-------------------------|---------|-------------------------|---------|-------------------------|----------|-------------------------|
| Condition | CS                    |                         | 0 mg/ml |                         | 8 mg/ml |                         | 36 mg/ml |                         |
| Week      | N                     | Estimated Mean (95% CI) | N       | Estimated Mean (95% CI) | N       | Estimated Mean (95% CI) | N        | Estimated Mean (95% CI) |
| Week 0    | 130                   | 18.37<br>(17.13, 19.61) | 130     | 18.79<br>(17.55, 20.02) | 130     | 19.45<br>(18.21, 20.69) | 130      | 17.76<br>(16.52, 18.99) |
| Week 1    | 120                   | 15.42<br>(14.17, 16.67) | 112     | 13.54<br>(12.28, 14.80) | 116     | 13.19<br>(11.94, 14.44) | 120      | 12.20<br>(10.95, 13.45) |
| Week 2    | 115                   | 14.56<br>(13.30, 15.82) | 104     | 12.27<br>(10.98, 13.55) | 116     | 12.03<br>(10.77, 13.29) | 113      | 10.84<br>(9.58, 12.11)  |
| Week 4    | 115                   | 13.23<br>(11.96, 14.50) | 95      | 10.22<br>(8.89, 11.54)  | 110     | 10.13<br>(8.85, 11.41)  | 112      | 9.25<br>(7.97, 10.52)   |
| Week 8    | 95                    | 12.67<br>(11.36, 13.99) | 84      | 9.70<br>(8.32, 11.08)   | 92      | 9.59<br>(8.26, 10.92)   | 95       | 8.63<br>(7.31, 9.95)    |
| Week 12   | 92                    | 11.82<br>(10.47, 13.17) | 78      | 9.70<br>(8.26, 11.13)   | 84      | 9.04<br>(7.66, 10.41)   | 93       | 7.76<br>(6.41, 9.11)    |
| Week 16   | 86                    | 11.68<br>(10.29, 13.07) | 71      | 8.83<br>(7.33, 10.32)   | 78      | 9.31<br>(7.89, 10.74)   | 84       | 6.98<br>(5.58, 8.38)    |
| Week 20   | 86                    | 11.62<br>(10.21, 13.04) | 65      | 9.50<br>(7.95, 11.06)   | 72      | 8.52<br>(7.04, 10.00)   | 78       | 6.76<br>(5.31, 8.21)    |
| Week 24   | 91                    | 11.31<br>(9.88, 12.74)  | 69      | 8.62<br>(7.04, 10.21)   | 74      | 8.02<br>(6.50, 9.54)    | 80       | 6.62<br>(5.13, 8.10)    |
|           | <b>Adjusted Model</b> |                         |         |                         |         |                         |          |                         |
| Week 0    | 130                   | 17.61<br>(16.61, 18.61) | 130     | 17.68<br>(16.65, 18.7)  | 130     | 18.15<br>(17.1, 19.19)  | 130      | 17.43<br>(16.42, 18.44) |
| Week 1    | 120                   | 14.76<br>(13.75, 15.77) | 112     | 12.50<br>(11.45, 13.55) | 116     | 11.92<br>(10.86, 12.98) | 120      | 11.91<br>(10.89, 12.94) |
| Week 2    | 115                   | 13.94<br>(12.91, 14.96) | 104     | 11.40<br>(10.32, 12.48) | 116     | 10.91<br>(9.84, 11.98)  | 113      | 10.57<br>(9.53, 11.61)  |
| Week 4    | 115                   | 12.66<br>(11.63, 13.7)  | 95      | 9.40<br>(8.29, 10.51)   | 110     | 9.01<br>(7.93, 10.10)   | 112      | 8.91<br>(7.86, 9.96)    |
| Week 8    | 95                    | 12.09<br>(11.02, 13.17) | 84      | 8.63<br>(7.47, 9.79)    | 92      | 8.74<br>(7.60, 9.88)    | 95       | 8.31<br>(7.21, 9.40)    |
| Week 12   | 92                    | 11.03<br>(9.93, 12.13)  | 78      | 8.70<br>(7.50, 9.91)    | 84      | 7.88<br>(6.69, 9.06)    | 93       | 7.44<br>(6.32, 8.56)    |
| Week 16   | 86                    | 10.89<br>(9.76, 12.02)  | 71      | 7.81<br>(6.57, 9.06)    | 78      | 8.39<br>(7.16, 9.62)    | 84       | 6.70<br>(5.54, 7.87)    |
| Week 20   | 86                    | 10.80<br>(9.66, 11.95)  | 65      | 8.50<br>(7.21, 9.80)    | 72      | 7.58<br>(6.31, 8.85)    | 78       | 6.47<br>(5.27, 7.68)    |
| Week 24   | 91                    | 10.44<br>(9.30, 11.58)  | 69      | 7.73<br>(6.43, 9.03)    | 74      | 7.14<br>(5.84, 8.43)    | 80       | 6.31<br>(5.09, 7.53)    |

Note: CPD, cigarettes smoked per day; CS, cigarette substitute; CI, confidence interval. The adjusted model included the following covariates: site, gender, age, race/ethnicity, week 0 exhaled CO, week 0 cigarettes smoked per day, education level, week 0 Kessler K6 score, week 0 Penn State Cigarette Dependence Index score, and week 0 forced expiratory volume in one second.

**Table S53. Estimated mean cigarettes smoked per day in unadjusted and adjusted mixed models using per-protocol method**

| CPD       | Unadjusted Model |                         |         |                         |         |                         |          |                         |
|-----------|------------------|-------------------------|---------|-------------------------|---------|-------------------------|----------|-------------------------|
| Condition | CS               |                         | 0 mg/ml |                         | 8 mg/ml |                         | 36 mg/ml |                         |
| Week      | N                | Estimated Mean (95% CI) | N       | Estimated Mean (95% CI) | N       | Estimated Mean (95% CI) | N        | Estimated Mean (95% CI) |
| Week 0    | 86               | 18.57<br>(17.05, 20.09) | 67      | 18.31<br>(16.59, 20.03) | 67      | 18.51<br>(16.79, 20.23) | 79       | 17.37<br>(15.78, 18.95) |
| Week 1    | 83               | 15.78<br>(14.26, 17.31) | 65      | 12.91<br>(11.18, 14.63) | 64      | 12.75<br>(11.02, 14.48) | 78       | 12.66<br>(11.07, 14.24) |
| Week 2    | 84               | 15.08<br>(13.56, 16.60) | 66      | 11.67<br>(9.95, 13.40)  | 67      | 11.63<br>(9.91, 13.35)  | 78       | 11.00<br>(9.41, 12.58)  |
| Week 4    | 86               | 13.69<br>(12.17, 15.21) | 67      | 9.78<br>(8.06, 11.50)   | 67      | 9.41<br>(7.69, 11.13)   | 79       | 9.25<br>(7.66, 10.83)   |
| Week 8    | 80               | 12.98<br>(11.46, 14.51) | 66      | 9.33<br>(7.61, 11.06)   | 66      | 9.01<br>(7.29, 10.73)   | 75       | 8.45<br>(6.86, 10.04)   |
| Week 12   | 86               | 11.98<br>(10.46, 13.50) | 67      | 9.20<br>(7.48, 10.92)   | 67      | 8.69<br>(6.97, 10.41)   | 79       | 7.43<br>(5.85, 9.02)    |
| Week 16   | 81               | 11.91<br>(10.39, 13.44) | 64      | 8.28<br>(6.55, 10.01)   | 64      | 9.01<br>(7.28, 10.74)   | 77       | 6.67<br>(5.08, 8.26)    |
| Week 20   | 81               | 12.02<br>(10.49, 13.54) | 61      | 9.10<br>(7.37, 10.83)   | 65      | 8.40<br>(6.67, 10.12)   | 77       | 6.52<br>(4.93, 8.11)    |
| Week 24   | 86               | 11.40<br>(9.88, 12.92)  | 67      | 8.26<br>(6.53, 9.98)    | 67      | 7.80<br>(6.07, 9.52)    | 79       | 6.35<br>(4.76, 7.93)    |
|           | Adjusted Model   |                         |         |                         |         |                         |          |                         |
| Week 0    | 86               | 17.24<br>(15.94, 18.54) | 67      | 17.09<br>(15.61, 18.56) | 67      | 17.53<br>(16.02, 19.03) | 79       | 16.73<br>(15.33, 18.13) |
| Week 1    | 83               | 14.37<br>(13.07, 15.68) | 65      | 11.88<br>(10.40, 13.36) | 64      | 11.81<br>(10.3, 13.32)  | 78       | 12.08<br>(10.68, 13.48) |
| Week 2    | 84               | 13.65<br>(12.34, 14.95) | 66      | 10.77<br>(9.29, 12.25)  | 67      | 10.79<br>(9.28, 12.29)  | 78       | 10.42<br>(9.01, 11.82)  |
| Week 4    | 86               | 12.26<br>(10.96, 13.56) | 67      | 8.92<br>(7.44, 10.40)   | 67      | 8.34<br>(6.83, 9.84)    | 79       | 8.56<br>(7.16, 9.96)    |
| Week 8    | 80               | 11.55<br>(10.24, 12.87) | 66      | 8.17<br>(6.69, 9.65)    | 66      | 8.11<br>(6.60, 9.61)    | 75       | 7.84<br>(6.43, 9.24)    |
| Week 12   | 86               | 10.37<br>(9.06, 11.67)  | 67      | 8.05<br>(6.57, 9.52)    | 67      | 7.51<br>(6.01, 9.02)    | 79       | 6.76<br>(5.36, 8.16)    |
| Week 16   | 81               | 10.37<br>(9.06, 11.68)  | 64      | 7.06<br>(5.58, 8.55)    | 64      | 8.03<br>(6.52, 9.54)    | 77       | 6.00<br>(4.60, 7.40)    |
| Week 20   | 81               | 10.51<br>(9.20, 11.82)  | 61      | 7.78<br>(6.29, 9.27)    | 65      | 7.32<br>(5.81, 8.83)    | 77       | 5.85<br>(4.45, 7.25)    |
| Week 24   | 86               | 9.87<br>(8.56, 11.17)   | 67      | 7.09<br>(5.61, 8.57)    | 67      | 6.66<br>(5.15, 8.16)    | 79       | 5.66<br>(4.26, 7.06)    |

Note: CPD, cigarettes smoked per day; CS, cigarette substitute; CI, confidence interval. The adjusted model included the following covariates: site, gender, age, race/ethnicity, week 0 exhaled CO, week 0 cigarettes smoked per day, education level, week 0 Kessler K6 score, week 0 Penn State Cigarette Dependence Index score, and week 0 forced expiratory volume in one second. Sample size included participants who have available cigarettes smoked per day at week 0, 4, 12 and 24, which is N=86, 67, 67 and 79 for CS, 0 mg/ml, 8 mg/ml and 36 mg/ml, respectively.

**Table S54. Estimated mean cigarettes smoked per day in unadjusted and adjusted mixed models using baseline-carried forward method**

| CPD       | Unadjusted Model |                            |         |                            |         |                            |          |                            |
|-----------|------------------|----------------------------|---------|----------------------------|---------|----------------------------|----------|----------------------------|
| Condition | CS               |                            | 0 mg/ml |                            | 8 mg/ml |                            | 36 mg/ml |                            |
| Week      | N                | Estimated Mean<br>(95% CI) | N       | Estimated Mean<br>(95% CI) | N       | Estimated Mean<br>(95% CI) | N        | Estimated Mean<br>(95% CI) |
| Week 0    | 130              | 18.37<br>(16.89, 19.85)    | 130     | 18.79<br>(17.30, 20.27)    | 130     | 19.45<br>(17.97, 20.93)    | 130      | 17.76<br>(16.28, 19.24)    |
| Week 1    | 130              | 15.68<br>(14.2, 17.16)     | 130     | 14.28<br>(12.80, 15.77)    | 130     | 13.83<br>(12.35, 15.31)    | 130      | 12.61<br>(11.13, 14.09)    |
| Week 2    | 130              | 15.23<br>(13.75, 16.71)    | 130     | 13.62<br>(12.14, 15.10)    | 130     | 13.25<br>(11.77, 14.73)    | 130      | 11.78<br>(10.30, 13.26)    |
| Week 4    | 130              | 13.96<br>(12.48, 15.45)    | 130     | 12.66<br>(11.18, 14.15)    | 130     | 11.87<br>(10.39, 13.35)    | 130      | 10.56<br>(9.08, 12.04)     |
| Week 8    | 130              | 14.48<br>(13.00, 15.96)    | 130     | 12.88<br>(11.39, 14.36)    | 130     | 13.01<br>(11.53, 14.49)    | 130      | 11.13<br>(9.65, 12.61)     |
| Week 12   | 130              | 13.88<br>(12.40, 15.36)    | 130     | 13.33<br>(11.85, 14.81)    | 130     | 12.92<br>(11.44, 14.41)    | 130      | 10.77<br>(9.29, 12.25)     |
| Week 16   | 130              | 13.86<br>(12.38, 15.35)    | 130     | 13.34<br>(11.86, 14.82)    | 130     | 13.42<br>(11.94, 14.90)    | 130      | 11.02<br>(9.54, 12.50)     |
| Week 20   | 130              | 13.72<br>(12.24, 15.20)    | 130     | 14.06<br>(12.58, 15.55)    | 130     | 13.67<br>(12.19, 15.16)    | 130      | 11.24<br>(9.76, 12.72)     |
| Week 24   | 130              | 13.41<br>(11.92, 14.89)    | 130     | 13.47<br>(11.99, 14.95)    | 130     | 13.48<br>(11.99, 14.96)    | 130      | 11.05<br>(9.57, 12.53)     |
|           | Adjusted Model   |                            |         |                            |         |                            |          |                            |
| Week 0    | 130              | 18.05<br>(16.93, 19.18)    | 130     | 17.97<br>(16.82, 19.13)    | 130     | 18.36<br>(17.19, 19.53)    | 130      | 18.03<br>(16.89, 19.17)    |
| Week 1    | 130              | 15.46<br>(14.33, 16.58)    | 130     | 13.50<br>(12.34, 14.65)    | 130     | 12.75<br>(11.58, 13.92)    | 130      | 12.93<br>(11.79, 14.06)    |
| Week 2    | 130              | 15.05<br>(13.92, 16.17)    | 130     | 13.01<br>(11.85, 14.16)    | 130     | 12.20<br>(11.03, 13.37)    | 130      | 12.03<br>(10.89, 13.16)    |
| Week 4    | 130              | 13.83<br>(12.71, 14.96)    | 130     | 11.86<br>(10.71, 13.02)    | 130     | 10.93<br>(9.76, 12.10)     | 130      | 10.71<br>(9.58, 11.85)     |
| Week 8    | 130              | 14.3<br>(13.17, 15.42)     | 130     | 11.91<br>(10.76, 13.07)    | 130     | 12.08<br>(10.91, 13.25)    | 130      | 11.39<br>(10.25, 12.53)    |
| Week 12   | 130              | 13.38<br>(12.25, 14.5)     | 130     | 12.37<br>(11.22, 13.53)    | 130     | 11.82<br>(10.65, 12.99)    | 130      | 11.01<br>(9.87, 12.15)     |
| Week 16   | 130              | 13.44<br>(12.32, 14.57)    | 130     | 12.35<br>(11.2, 13.51)     | 130     | 12.52<br>(11.35, 13.69)    | 130      | 11.29<br>(10.15, 12.42)    |
| Week 20   | 130              | 13.28<br>(12.16, 14.40)    | 130     | 13.13<br>(11.98, 14.29)    | 130     | 12.70<br>(11.53, 13.87)    | 130      | 11.41<br>(10.27, 12.54)    |
| Week 24   | 130              | 12.95<br>(11.82, 14.07)    | 130     | 12.55<br>(11.40, 13.71)    | 130     | 12.51<br>(11.34, 13.68)    | 130      | 11.20<br>(10.06, 12.34)    |

Note: CPD, cigarettes smoked per day; CS, cigarette substitute; CI, confidence interval. The adjusted model included the following covariates: site, gender, age, race/ethnicity, week 0 exhaled CO, week 0 cigarettes smoked per day, education level, week 0 Kessler K6 score, week 0 Penn State Cigarette Dependence Index score, and week 0 forced expiratory volume in one second.

**Table S55. Estimated mean cigarettes smoked per day in unadjusted and adjusted mixed models using last-observation-carried-forward method**

| CPD       | Unadjusted Model      |                         |         |                         |         |                         |          |                         |
|-----------|-----------------------|-------------------------|---------|-------------------------|---------|-------------------------|----------|-------------------------|
| Condition | CS                    |                         | 0 mg/ml |                         | 8 mg/ml |                         | 36 mg/ml |                         |
| Week      | N                     | Estimated Mean (95% CI) | N       | Estimated Mean (95% CI) | N       | Estimated Mean (95% CI) | N        | Estimated Mean (95% CI) |
| Week 0    | 130                   | 18.37<br>(17.04, 19.7)  | 130     | 18.79<br>(17.46, 20.12) | 130     | 19.45<br>(18.12, 20.78) | 130      | 17.76<br>(16.43, 19.09) |
| Week 1    | 130                   | 15.68<br>(14.35, 17.01) | 130     | 14.28<br>(12.95, 15.61) | 130     | 13.83<br>(12.50, 15.16) | 130      | 12.61<br>(11.28, 13.94) |
| Week 2    | 130                   | 14.80<br>(13.47, 16.13) | 130     | 13.11<br>(11.78, 14.44) | 130     | 12.56<br>(11.23, 13.88) | 130      | 11.31<br>(9.98, 12.64)  |
| Week 4    | 130                   | 13.67<br>(12.34, 15.00) | 130     | 11.59<br>(10.26, 12.92) | 130     | 10.94<br>(9.61, 12.26)  | 130      | 9.87<br>(8.54, 11.20)   |
| Week 8    | 130                   | 13.20<br>(11.87, 14.53) | 130     | 11.23<br>(9.90, 12.56)  | 130     | 10.48<br>(9.16, 11.81)  | 130      | 9.49<br>(8.16, 10.82)   |
| Week 12   | 130                   | 12.54<br>(11.21, 13.87) | 130     | 11.26<br>(9.93, 12.59)  | 130     | 10.15<br>(8.82, 11.48)  | 130      | 8.84<br>(7.51, 10.17)   |
| Week 16   | 130                   | 12.35<br>(11.02, 13.68) | 130     | 10.80<br>(9.47, 12.13)  | 130     | 10.35<br>(9.02, 11.68)  | 130      | 8.34<br>(7.01, 9.67)    |
| Week 20   | 130                   | 12.29<br>(10.96, 13.62) | 130     | 11.23<br>(9.90, 12.56)  | 130     | 9.89<br>(8.56, 11.22)   | 130      | 8.26<br>(6.93, 9.59)    |
| Week 24   | 130                   | 12.05<br>(10.72, 13.38) | 130     | 10.87<br>(9.54, 12.19)  | 130     | 9.66<br>(8.33, 10.99)   | 130      | 8.20<br>(6.87, 9.53)    |
|           | <b>Adjusted Model</b> |                         |         |                         |         |                         |          |                         |
| Week 0    | 130                   | 17.93<br>(16.83, 19.04) | 130     | 17.98<br>(16.84, 19.11) | 130     | 18.45<br>(17.30, 19.61) | 130      | 17.78<br>(16.66, 18.91) |
| Week 1    | 130                   | 15.34<br>(14.23, 16.44) | 130     | 13.50<br>(12.36, 14.64) | 130     | 12.84<br>(11.69, 13.99) | 130      | 12.68<br>(11.56, 13.80) |
| Week 2    | 130                   | 14.48<br>(13.37, 15.58) | 130     | 12.45<br>(11.31, 13.59) | 130     | 11.64<br>(10.48, 12.79) | 130      | 11.38<br>(10.25, 12.50) |
| Week 4    | 130                   | 13.41<br>(12.3, 14.51)  | 130     | 10.91<br>(9.77, 12.04)  | 130     | 9.98<br>(8.82, 11.13)   | 130      | 9.83<br>(8.71, 10.95)   |
| Week 8    | 130                   | 12.94<br>(11.83, 14.05) | 130     | 10.38<br>(9.24, 11.51)  | 130     | 9.62<br>(8.46, 10.77)   | 130      | 9.49<br>(8.37, 10.61)   |
| Week 12   | 130                   | 12.16<br>(11.06, 13.27) | 130     | 10.44<br>(9.31, 11.58)  | 130     | 9.08<br>(7.93, 10.23)   | 130      | 8.82<br>(7.70, 9.94)    |
| Week 16   | 130                   | 11.96<br>(10.86, 13.07) | 130     | 9.94<br>(8.81, 11.08)   | 130     | 9.40<br>(8.24, 10.55)   | 130      | 8.32<br>(7.20, 9.44)    |
| Week 20   | 130                   | 11.98<br>(10.87, 13.08) | 130     | 10.35<br>(9.21, 11.49)  | 130     | 8.93<br>(7.78, 10.09)   | 130      | 8.24<br>(7.11, 9.36)    |
| Week 24   | 130                   | 11.72<br>(10.62, 12.83) | 130     | 10.02<br>(8.88, 11.15)  | 130     | 8.65<br>(7.50, 9.80)    | 130      | 8.16<br>(7.04, 9.29)    |

Note: CPD, cigarettes smoked per day; CS, cigarette substitute; CI, confidence interval. The adjusted model included the following covariates: site, gender, age, race/ethnicity, week 0 exhaled CO, week 0 cigarettes smoked per day, education level, week 0 Kessler K6 score, week 0 Penn State Cigarette Dependence Index score, and week 0 forced expiratory volume in one second.

**Table S56. P-values for pairwise comparisons between conditions at each time point for cigarettes smoked per day using multiple imputation method**

| Unadjusted Model* |                   |         |         |          |
|-------------------|-------------------|---------|---------|----------|
| Week 0            |                   |         |         |          |
|                   | CS                | 0 mg/ml | 8 mg/ml | 36 mg/ml |
| CS                | ..                |         |         |          |
| 0 mg/ml           | 0.64              | ..      |         |          |
| 8 mg/ml           | 0.22              | 0.45    | ..      |          |
| 36 mg/ml          | 0.49              | 0.24    | 0.05    | ..       |
| Week 1            |                   |         |         |          |
| CS                | ..                |         |         |          |
| 0 mg/ml           | 0.03              | ..      |         |          |
| 8 mg/ml           | 0.01              | 0.75    | ..      |          |
| 36 mg/ml          | 0.0002            | 0.12    | 0.22    | ..       |
| Week 2            |                   |         |         |          |
| CS                | ..                |         |         |          |
| 0 mg/ml           | 0.01              | ..      |         |          |
| 8 mg/ml           | 0.01              | 0.82    | ..      |          |
| 36 mg/ml          | <0.0001           | 0.16    | 0.10    | ..       |
| Week 4            |                   |         |         |          |
| CS                | ..                |         |         |          |
| 0 mg/ml           | 0.003             | ..      |         |          |
| 8 mg/ml           | 0.002             | 0.90    | ..      |          |
| 36 mg/ml          | <0.0001           | 0.21    | 0.26    | ..       |
| Week 8            |                   |         |         |          |
| CS                | ..                |         |         |          |
| 0 mg/ml           | 0.01 <sup>s</sup> | ..      |         |          |
| 8 mg/ml           | 0.02              | 0.73    | ..      |          |
| 36 mg/ml          | <0.0001           | 0.23    | 0.14    | ..       |
| Week 12           |                   |         |         |          |
| CS                | ..                |         |         |          |
| 0 mg/ml           | 0.03              | ..      |         |          |
| 8 mg/ml           | 0.05              | 0.86    | ..      |          |
| 36 mg/ml          | <0.0001           | 0.06    | 0.11    | ..       |
| Week 16           |                   |         |         |          |
| CS                | ..                |         |         |          |
| 0 mg/ml           | 0.01 <sup>s</sup> | ..      |         |          |
| 8 mg/ml           | 0.03              | 0.64    | ..      |          |
| 36 mg/ml          | <0.0001           | 0.04    | 0.02    | ..       |
| Week 20           |                   |         |         |          |



|                        |         |         |         |          |
|------------------------|---------|---------|---------|----------|
| CS                     | ..      |         |         |          |
| 0 mg/ml                | 0.06    | ..      |         |          |
| 8 mg/ml                | 0.02    | 0.93    | ..      |          |
| 36 mg/ml               | <0.0001 | 0.07    | 0.033   | ..       |
| <b>Week 24</b>         |         |         |         |          |
| CS                     | ..      |         |         |          |
| 0 mg/ml                | 0.04    | ..      |         |          |
| 8 mg/ml                | 0.03    | 0.93    | ..      |          |
| 36 mg/ml               | 0.0002  | 0.05    | 0.10    | ..       |
| <b>Adjusted Model*</b> |         |         |         |          |
| <b>Week 0</b>          |         |         |         |          |
|                        | CS      | 0 mg/ml | 8 mg/ml | 36 mg/ml |
| CS                     | ..      |         |         |          |
| 0 mg/ml                | 0.96    | ..      |         |          |
| 8 mg/ml                | 0.34    | 0.36    | ..      |          |
| 36 mg/ml               | 0.70    | 0.67    | 0.18    | ..       |
| <b>Week 1</b>          |         |         |         |          |
| CS                     | ..      |         |         |          |
| 0 mg/ml                | 0.0005  | ..      |         |          |
| 8 mg/ml                | <0.0001 | 0.55    | ..      |          |
| 36 mg/ml               | <0.0001 | 0.33    | 0.71    | ..       |
| <b>Week 2</b>          |         |         |         |          |
| CS                     | ..      |         |         |          |
| 0 mg/ml                | <0.0001 | ..      |         |          |
| 8 mg/ml                | <0.0001 | 0.87    | ..      |          |
| 36 mg/ml               | <0.0001 | 0.44    | 0.33    | ..       |
| <b>Week 4</b>          |         |         |         |          |
| CS                     | ..      |         |         |          |
| 0 mg/ml                | <0.0001 | ..      |         |          |
| 8 mg/ml                | <0.0001 | 0.76    | ..      |          |
| 36 mg/ml               | <0.0001 | 0.57    | 0.80    | ..       |
| <b>Week 8</b>          |         |         |         |          |
| CS                     | ..      |         |         |          |
| 0 mg/ml                | <0.0001 | ..      |         |          |
| 8 mg/ml                | 0.0008  | 0.75    | ..      |          |
| 36 mg/ml               | <0.0001 | 0.60    | 0.43    | ..       |
| <b>Week 12</b>         |         |         |         |          |
| CS                     | ..      |         |         |          |
| 0 mg/ml                | 0.0005  | ..      |         |          |

|                 |                   |      |      |    |
|-----------------|-------------------|------|------|----|
| <b>8 mg/ml</b>  | 0.01              | 0.75 | ..   |    |
| <b>36 mg/ml</b> | <0.0001           | 0.15 | 0.33 | .. |
| <b>Week 16</b>  |                   |      |      |    |
| <b>CS</b>       | ..                |      |      |    |
| <b>0 mg/ml</b>  | <0.0001           | ..   |      |    |
| <b>8 mg/ml</b>  | 0.0005            | 0.62 | ..   |    |
| <b>36 mg/ml</b> | <0.0001           | 0.09 | 0.05 | .. |
| <b>Week 20</b>  |                   |      |      |    |
| <b>CS</b>       | ..                |      |      |    |
| <b>0 mg/ml</b>  | 0.01 <sup>S</sup> | ..   |      |    |
| <b>8 mg/ml</b>  | <0.0001           | 0.81 | ..   |    |
| <b>36 mg/ml</b> | <0.0001           | 0.17 | 0.10 | .. |
| <b>Week 24</b>  |                   |      |      |    |
| <b>CS</b>       | ..                |      |      |    |
| <b>0 mg/ml</b>  | 0.002             | ..   |      |    |
| <b>8 mg/ml</b>  | 0.001             | 0.80 | ..   |    |
| <b>36 mg/ml</b> | <0.0001           | 0.12 | 0.31 | .. |

Note: CS, cigarette substitute. The adjusted model included the following covariates: site, gender, age, race/ethnicity, week 0 exhaled CO, week 0 cigarettes smoked per day, education level, week 0 Kessler K6 score, week 0 Penn State Cigarette Dependence Index score, and week 0 forced expiratory volume in one second.

\* Bonferroni correction  $\alpha=0.008$ , between all conditions.

S Significant difference between cigarette substitute and 0 mg/ml at week 8 in unadjusted model with  $p=0.005$ ; significant difference between cigarette substitute and 0 mg/ml at week 16 in unadjusted model with  $p\text{-value}=0.0077$ ; significant difference between cigarette substitute and 0 mg/ml at week 20 in adjusted model with  $p=0.007$ , comparing to Bonferroni correction  $\alpha=0.05/6=0.0083$ .

**Table S57. P-values for pairwise comparisons between conditions at each time point for cigarettes smoked per day using intent-to-treat method**

| Unadjusted Model* |                   |         |         |          |
|-------------------|-------------------|---------|---------|----------|
| Week 0            |                   |         |         |          |
|                   | CS                | 0 mg/ml | 8 mg/ml | 36 mg/ml |
| CS                | ..                |         |         |          |
| 0 mg/ml           | 0.64              | ..      |         |          |
| 8 mg/ml           | 0.23              | 0.46    | ..      |          |
| 36 mg/ml          | 0.49              | 0.25    | 0.06    | ..       |
| Week 1            |                   |         |         |          |
| CS                | ..                |         |         |          |
| 0 mg/ml           | 0.04              | ..      |         |          |
| 8 mg/ml           | 0.01              | 0.70    | ..      |          |
| 36 mg/ml          | 0.0003            | 0.14    | 0.27    | ..       |
| Week 2            |                   |         |         |          |
| CS                | ..                |         |         |          |
| 0 mg/ml           | 0.01              | ..      |         |          |
| 8 mg/ml           | 0.01 <sup>s</sup> | 0.80    | ..      |          |
| 36 mg/ml          | <0.0001           | 0.12    | 0.19    | ..       |
| Week 4            |                   |         |         |          |
| CS                | ..                |         |         |          |
| 0 mg/ml           | 0.001             | ..      |         |          |
| 8 mg/ml           | 0.0008            | 0.93    | ..      |          |
| 36 mg/ml          | <0.0001           | 0.30    | 0.34    | ..       |
| Week 8            |                   |         |         |          |
| CS                | ..                |         |         |          |
| 0 mg/ml           | 0.002             | ..      |         |          |
| 8 mg/ml           | 0.001             | 0.91    | ..      |          |
| 36 mg/ml          | <0.0001           | 0.27    | 0.32    | ..       |
| Week 12           |                   |         |         |          |
| CS                | ..                |         |         |          |
| 0 mg/ml           | 0.04              | ..      |         |          |
| 8 mg/ml           | 0.01 <sup>s</sup> | 0.51    | ..      |          |
| 36 mg/ml          | <0.001            | 0.05    | 0.20    | ..       |
| Week 16           |                   |         |         |          |
| CS                | ..                |         |         |          |
| 0 mg/ml           | 0.01 <sup>s</sup> | ..      |         |          |
| 8 mg/ml           | 0.02              | 0.64    | ..      |          |
| 36 mg/ml          | <0.0001           | 0.08    | 0.02    | ..       |

| <b>Week 20</b>         |         |         |         |          |
|------------------------|---------|---------|---------|----------|
| CS                     | ..      |         |         |          |
| 0 mg/ml                | 0.05    | ..      |         |          |
| 8 mg/ml                | 0.003   | 0.37    | ..      |          |
| 36 mg/ml               | <0.0001 | 0.01    | 0.10    | ..       |
| <b>Week 24</b>         |         |         |         |          |
| CS                     | ..      |         |         |          |
| 0 mg/ml                | 0.01    | ..      |         |          |
| 8 mg/ml                | 0.002   | 0.59    | ..      |          |
| 36 mg/ml               | <0.0001 | 0.07    | 0.20    | ..       |
| <b>Adjusted Model*</b> |         |         |         |          |
| <b>Week 0</b>          |         |         |         |          |
|                        | CS      | 0 mg/ml | 8 mg/ml | 36 mg/ml |
| CS                     | ..      |         |         |          |
| 0 mg/ml                | 0.91    | ..      |         |          |
| 8 mg/ml                | 0.41    | 0.48    | ..      |          |
| 36 mg/ml               | 0.78    | 0.70    | 0.28    | ..       |
| <b>Week 1</b>          |         |         |         |          |
| CS                     | ..      |         |         |          |
| 0 mg/ml                | 0.0007  | ..      |         |          |
| 8 mg/ml                | <0.0001 | 0.39    | ..      |          |
| 36 mg/ml               | <0.0001 | 0.38    | 0.99    | ..       |
| <b>Week 2</b>          |         |         |         |          |
| CS                     | ..      |         |         |          |
| 0 mg/ml                | 0.0002  | ..      |         |          |
| 8 mg/ml                | <0.0001 | 0.48    | ..      |          |
| 36 mg/ml               | <0.0001 | 0.23    | 0.62    | ..       |
| <b>Week 4</b>          |         |         |         |          |
| CS                     | ..      |         |         |          |
| 0 mg/ml                | <0.0001 | ..      |         |          |
| 8 mg/ml                | <0.0001 | 0.59    | ..      |          |
| 36 mg/ml               | <0.0001 | 0.49    | 0.88    | ..       |
| <b>Week 8</b>          |         |         |         |          |
| CS                     | ..      |         |         |          |
| 0 mg/ml                | <0.0001 | ..      |         |          |
| 8 mg/ml                | <0.0001 | 0.89    | ..      |          |
| 36 mg/ml               | <0.0001 | 0.66    | 0.56    | ..       |
| <b>Week 12</b>         |         |         |         |          |
| CS                     | ..      |         |         |          |

|                 |                   |      |       |    |
|-----------------|-------------------|------|-------|----|
| <b>0 mg/ml</b>  | 0.002             | ..   |       |    |
| <b>8 mg/ml</b>  | <0.0001           | 0.30 | ..    |    |
| <b>36 mg/ml</b> | <0.0001           | 0.10 | 0.56  | .. |
| <b>Week 16</b>  |                   |      |       |    |
| <b>CS</b>       | ..                |      |       |    |
| <b>0 mg/ml</b>  | 0.0001            | ..   |       |    |
| <b>8 mg/ml</b>  | 0.002             | 0.48 | ..    |    |
| <b>36 mg/ml</b> | <0.0001           | 0.16 | 0.034 | .. |
| <b>Week 20</b>  |                   |      |       |    |
| <b>CS</b>       | ..                |      |       |    |
| <b>0 mg/ml</b>  | 0.01 <sup>s</sup> | ..   |       |    |
| <b>8 mg/ml</b>  | <0.0001           | 0.28 | ..    |    |
| <b>36 mg/ml</b> | <0.0001           | 0.02 | 0.18  | .. |
| <b>Week 24</b>  |                   |      |       |    |
| <b>CS</b>       | ..                |      |       |    |
| <b>0 mg/ml</b>  | 0.0009            | ..   |       |    |
| <b>8 mg/ml</b>  | <0.0001           | 0.50 | ..    |    |
| <b>36 mg/ml</b> | <0.0001           | 0.09 | 0.32  | .. |

Note: CS, cigarette substitute. The adjusted model included the following covariates: site, gender, age, race/ethnicity, week 0 exhaled CO, week 0 cigarettes smoked per day, education level, week 0 Kessler K6 score, week 0 Penn State Cigarette Dependence Index score, and week 0 forced expiratory volume in one second.

\* Bonferroni correction  $\alpha=0.008$ , between all conditions.

S Significant difference between cigarette substitute and 8 mg/ml at week 2 in unadjusted model with  $p=0.005$ ; significant difference between cigarette substitute and 8 mg/ml at week 12 in unadjusted model with  $p=0.005$ ; significant difference between cigarette substitute and 0 mg/ml at week 16 in unadjusted model with  $p=0.006$ ; significant difference between cigarette substitute and 0 mg/ml at week 20 in adjusted model with  $p=0.005$ , comparing to Bonferroni correction  $\alpha=0.05/6=0.0083$ .

**Table S58. P-values for pairwise comparisons between conditions at each time point for cigarettes smoked per day using per-protocol method**

| Unadjusted Model* |                   |         |         |          |
|-------------------|-------------------|---------|---------|----------|
| Week 0            |                   |         |         |          |
|                   | CS                | 0 mg/ml | 8 mg/ml | 36 mg/ml |
| CS                | ..                |         |         |          |
| 0 mg/ml           | 0.82              | ..      |         |          |
| 8 mg/ml           | 0.95              | 0.87    | ..      |          |
| 36 mg/ml          | 0.28              | 0.43    | 0.34    | ..       |
| Week 1            |                   |         |         |          |
| CS                | ..                |         |         |          |
| 0 mg/ml           | 0.01              | ..      |         |          |
| 8 mg/ml           | 0.01              | 0.90    | ..      |          |
| 36 mg/ml          | 0.01 <sup>s</sup> | 0.83    | 0.94    | ..       |
| Week 2            |                   |         |         |          |
| CS                | ..                |         |         |          |
| 0 mg/ml           | 0.004             | ..      |         |          |
| 8 mg/ml           | 0.003             | 0.97    | ..      |          |
| 36 mg/ml          | 0.0003            | 0.57    | 0.60    | ..       |
| Week 4            |                   |         |         |          |
| CS                | ..                |         |         |          |
| 0 mg/ml           | 0.0009            | ..      |         |          |
| 8 mg/ml           | 0.0003            | 0.76    | ..      |          |
| 36 mg/ml          | <0.0001           | 0.66    | 0.89    | ..       |
| Week 8            |                   |         |         |          |
| CS                | ..                |         |         |          |
| 0 mg/ml           | 0.002             | ..      |         |          |
| 8 mg/ml           | 0.0007            | 0.80    | ..      |          |
| 36 mg/ml          | <0.0001           | 0.46    | 0.64    | ..       |
| Week 12           |                   |         |         |          |
| CS                | ..                |         |         |          |
| 0 mg/ml           | 0.02              | ..      |         |          |
| 8 mg/ml           | 0.01 <sup>s</sup> | 0.68    | ..      |          |
| 36 mg/ml          | <0.0001           | 0.14    | 0.29    | ..       |
| Week 16           |                   |         |         |          |
| CS                | ..                |         |         |          |
| 0 mg/ml           | 0.002             | ..      |         |          |
| 8 mg/ml           | 0.01              | 0.56    | ..      |          |
| 36 mg/ml          | <0.0001           | 0.18    | 0.05    | ..       |

| <b>Week 20</b>         |                   |                |                |                 |
|------------------------|-------------------|----------------|----------------|-----------------|
| CS                     | ..                |                |                |                 |
| 0 mg/ml                | 0.01              | ..             |                |                 |
| 8 mg/ml                | 0.002             | 0.57           | ..             |                 |
| 36 mg/ml               | <0.0001           | 0.031          | 0.12           | ..              |
| <b>Week 24</b>         |                   |                |                |                 |
| CS                     | ..                |                |                |                 |
| 0 mg/ml                | 0.01 <sup>s</sup> | ..             |                |                 |
| 8 mg/ml                | 0.002             | 0.71           | ..             |                 |
| 36 mg/ml               | <0.0001           | 0.11           | 0.23           | ..              |
| <b>Adjusted Model*</b> |                   |                |                |                 |
| <b>Week 0</b>          |                   |                |                |                 |
|                        | <b>CS</b>         | <b>0 mg/ml</b> | <b>8 mg/ml</b> | <b>36 mg/ml</b> |
| CS                     | ..                |                |                |                 |
| 0 mg/ml                | 0.86              | ..             |                |                 |
| 8 mg/ml                | 0.75              | 0.64           | ..             |                 |
| 36 mg/ml               | 0.54              | 0.69           | 0.38           | ..              |
| <b>Week 1</b>          |                   |                |                |                 |
| CS                     | ..                |                |                |                 |
| 0 mg/ml                | 0.004             | ..             |                |                 |
| 8 mg/ml                | 0.004             | 0.94           | ..             |                 |
| 36 mg/ml               | 0.01 <sup>s</sup> | 0.82           | 0.76           | ..              |
| <b>Week 2</b>          |                   |                |                |                 |
| CS                     | ..                |                |                |                 |
| 0 mg/ml                | 0.001             | ..             |                |                 |
| 8 mg/ml                | 0.001             | 0.99           | ..             |                 |
| 36 mg/ml               | <0.0001           | 0.69           | 0.68           | ..              |
| <b>Week 4</b>          |                   |                |                |                 |
| CS                     | ..                |                |                |                 |
| 0 mg/ml                | 0.0001            | ..             |                |                 |
| 8 mg/ml                | <0.0001           | 0.54           | ..             |                 |
| 36 mg/ml               | <0.0001           | 0.68           | 0.81           | ..              |
| <b>Week 8</b>          |                   |                |                |                 |
| CS                     | ..                |                |                |                 |
| 0 mg/ml                | 0.0001            | ..             |                |                 |
| 8 mg/ml                | 0.0001            | 0.95           | ..             |                 |
| 36 mg/ml               | <0.0001           | 0.71           | 0.77           | ..              |
| <b>Week 12</b>         |                   |                |                |                 |
| CS                     | ..                |                |                |                 |

|                |                   |      |      |    |
|----------------|-------------------|------|------|----|
| 0 mg/ml        | 0.01 <sup>S</sup> | ..   |      |    |
| 8 mg/ml        | 0.001             | 0.57 | ..   |    |
| 36 mg/ml       | <0.0001           | 0.14 | 0.40 | .. |
| <b>Week 16</b> |                   |      |      |    |
| CS             | ..                |      |      |    |
| 0 mg/ml        | 0.0002            | ..   |      |    |
| 8 mg/ml        | 0.01              | 0.31 | ..   |    |
| 36 mg/ml       | <0.0001           | 0.23 | 0.03 | .. |
| <b>Week 20</b> |                   |      |      |    |
| CS             | ..                |      |      |    |
| 0 mg/ml        | 0.002             | ..   |      |    |
| 8 mg/ml        | 0.0004            | 0.63 | ..   |    |
| 36 mg/ml       | <0.0001           | 0.03 | 0.10 | .. |
| <b>Week 24</b> |                   |      |      |    |
| CS             | ..                |      |      |    |
| 0 mg/ml        | 0.001             | ..   |      |    |
| 8 mg/ml        | 0.0003            | 0.65 | ..   |    |
| 36 mg/ml       | <0.0001           | 0.10 | 0.27 | .. |

Note: CS, cigarette substitute. The adjusted model included the following covariates: site, gender, age, race/ethnicity, week 0 exhaled CO, week 0 cigarettes smoked per day, education level, week 0 Kessler K6 score, week 0 Penn State Cigarette Dependence Index score, and week 0 forced expiratory volume in one second.

\* Bonferroni correction  $\alpha=0.008$ , between all conditions.

S Significant difference between cigarette substitute and 36 mg/ml at week 1 in unadjusted model with  $p=0.005$ ; significant difference between cigarette substitute and 8 mg/ml at week 12 in unadjusted model with  $p=0.005$ ; significant difference between cigarette substitute and 0 mg/ml at week 24 in unadjusted model with  $p=0.007$ ; significant difference between cigarette substitute and 36 mg/ml at week 1 in adjusted model with  $p=0.006$ ; significant difference between cigarette substitute and 0 mg/ml at week 12 in adjusted model,  $p=0.0076$ , comparing to Bonferroni correction  $\alpha=0.05/6=0.0083$ .



**Table S59. P-values for pairwise comparisons between conditions at each time point for cigarettes smoked per day using baseline-carried-forward method**

| Unadjusted Model* |                   |         |         |          |
|-------------------|-------------------|---------|---------|----------|
| <b>Week 0</b>     |                   |         |         |          |
|                   | CS                | 0 mg/ml | 8 mg/ml | 36 mg/ml |
| CS                | ..                |         |         |          |
| 0 mg/ml           | 0.70              | ..      |         |          |
| 8 mg/ml           | 0.31              | 0.54    | ..      |          |
| 36 mg/ml          | 0.57              | 0.34    | 0.11    | ..       |
| <b>Week 1</b>     |                   |         |         |          |
| CS                | ..                |         |         |          |
| 0 mg/ml           | 0.19              | ..      |         |          |
| 8 mg/ml           | 0.08              | 0.67    | ..      |          |
| 36 mg/ml          | 0.004             | 0.12    | 0.25    | ..       |
| <b>Week 2</b>     |                   |         |         |          |
| CS                | ..                |         |         |          |
| 0 mg/ml           | 0.13              | ..      |         |          |
| 8 mg/ml           | 0.06              | 0.73    | ..      |          |
| 36 mg/ml          | 0.001             | 0.08    | 0.17    | ..       |
| <b>Week 4</b>     |                   |         |         |          |
| CS                | ..                |         |         |          |
| 0 mg/ml           | 0.22              | ..      |         |          |
| 8 mg/ml           | 0.05              | 0.46    | ..      |          |
| 36 mg/ml          | 0.001             | 0.05    | 0.22    | ..       |
| <b>Week 8</b>     |                   |         |         |          |
| CS                | ..                |         |         |          |
| 0 mg/ml           | 0.13              | ..      |         |          |
| 8 mg/ml           | 0.17              | 0.90    | ..      |          |
| 36 mg/ml          | 0.002             | 0.10    | 0.08    | ..       |
| <b>Week 12</b>    |                   |         |         |          |
| CS                | ..                |         |         |          |
| 0 mg/ml           | 0.60              | ..      |         |          |
| 8 mg/ml           | 0.37              | 0.71    | ..      |          |
| 36 mg/ml          | 0.004             | 0.02    | 0.04    | ..       |
| <b>Week 16</b>    |                   |         |         |          |
| CS                | ..                |         |         |          |
| 0 mg/ml           | 0.63              | ..      |         |          |
| 8 mg/ml           | 0.68              | 0.94    | ..      |          |
| 36 mg/ml          | 0.01 <sup>S</sup> | 0.03    | 0.03    | ..       |
| <b>Week 20</b>    |                   |         |         |          |

|                        |                   |                   |         |          |
|------------------------|-------------------|-------------------|---------|----------|
| CS                     | ..                |                   |         |          |
| 0 mg/ml                | 0.75              | ..                |         |          |
| 8 mg/ml                | 0.97              | 0.71              | ..      |          |
| 36 mg/ml               | 0.02              | 0.01 <sup>s</sup> | 0.02    | ..       |
| <b>Week 24</b>         |                   |                   |         |          |
| CS                     | ..                |                   |         |          |
| 0 mg/ml                | 0.95              | ..                |         |          |
| 8 mg/ml                | 0.95              | 1.00              | ..      |          |
| 36 mg/ml               | 0.03              | 0.02              | 0.02    | ..       |
| <b>Adjusted Model*</b> |                   |                   |         |          |
| <b>Week 0</b>          |                   |                   |         |          |
|                        | CS                | 0 mg/ml           | 8 mg/ml | 36 mg/ml |
| CS                     | ..                |                   |         |          |
| 0 mg/ml                | 0.92              | ..                |         |          |
| 8 mg/ml                | 0.68              | 0.61              | ..      |          |
| 36 mg/ml               | 0.98              | 0.94              | 0.66    | ..       |
| <b>Week 1</b>          |                   |                   |         |          |
| CS                     | ..                |                   |         |          |
| 0 mg/ml                | 0.01              | ..                |         |          |
| 8 mg/ml                | 0.0003            | 0.32              | ..      |          |
| 36 mg/ml               | 0.0006            | 0.44              | 0.81    | ..       |
| <b>Week 2</b>          |                   |                   |         |          |
| CS                     | ..                |                   |         |          |
| 0 mg/ml                | 0.01 <sup>s</sup> | ..                |         |          |
| 8 mg/ml                | 0.0001            | 0.29              | ..      |          |
| 36 mg/ml               | <0.0001           | 0.19              | 0.82    | ..       |
| <b>Week 4</b>          |                   |                   |         |          |
| CS                     | ..                |                   |         |          |
| 0 mg/ml                | 0.01 <sup>s</sup> | ..                |         |          |
| 8 mg/ml                | 0.0001            | 0.22              | ..      |          |
| 36 mg/ml               | <0.0001           | 0.12              | 0.77    | ..       |
| <b>Week 8</b>          |                   |                   |         |          |
| CS                     | ..                |                   |         |          |
| 0 mg/ml                | 0.001             | ..                |         |          |
| 8 mg/ml                | 0.003             | 0.82              | ..      |          |
| 36 mg/ml               | <0.0001           | 0.48              | 0.36    | ..       |
| <b>Week 12</b>         |                   |                   |         |          |
| CS                     | ..                |                   |         |          |
| 0 mg/ml                | 0.18              | ..                |         |          |

|                 |       |      |      |    |
|-----------------|-------|------|------|----|
| <b>8 mg/ml</b>  | 0.04  | 0.47 | ..   |    |
| <b>36 mg/ml</b> | 0.001 | 0.07 | 0.28 | .. |
| <b>Week 16</b>  |       |      |      |    |
| <b>CS</b>       | ..    |      |      |    |
| <b>0 mg/ml</b>  | 0.14  | ..   |      |    |
| <b>8 mg/ml</b>  | 0.22  | 0.82 | ..   |    |
| <b>36 mg/ml</b> | 0.003 | 0.15 | 0.10 | .. |
| <b>Week 20</b>  |       |      |      |    |
| <b>CS</b>       | ..    |      |      |    |
| <b>0 mg/ml</b>  | 0.84  | ..   |      |    |
| <b>8 mg/ml</b>  | 0.44  | 0.57 | ..   |    |
| <b>36 mg/ml</b> | 0.01  | 0.02 | 0.08 | .. |
| <b>Week 24</b>  |       |      |      |    |
| <b>CS</b>       | ..    |      |      |    |
| <b>0 mg/ml</b>  | 0.59  | ..   |      |    |
| <b>8 mg/ml</b>  | 0.56  | 0.96 | ..   |    |
| <b>36 mg/ml</b> | 0.02  | 0.07 | 0.08 | .. |

Note: CS, cigarette substitute. The adjusted model included the following covariates: site, gender, age, race/ethnicity, week 0 exhaled CO, week 0 cigarettes smoked per day, education level, week 0 Kessler K6 score, week 0 Penn State Cigarette Dependence Index score, and week 0 forced expiratory volume in one second.

\* Bonferroni correction  $\alpha=0.008$ , between all conditions.

S Significant difference between cigarette substitute and 36 mg/ml at week 16 in unadjusted model,  $p=0.0078$ ; significant difference between 0 mg/ml and 36 mg/ml at week 20 in unadjusted model with  $p=0.0082$ ; significant difference between cigarette substitute and 36 mg/ml at week 2 in adjusted model,  $p=0.006$ ; significant difference between cigarette substitute and 0 mg/ml at week 4 in adjusted model,  $p\text{-value}=0.00803$ . All compared to Bonferroni correction  $\alpha=0.05/6=0.00833$ .

**Table S60. P-values for pairwise comparisons between conditions at each time point for cigarettes smoked per day using last-observation-carried-forward method**

| Unadjusted Model* |                   |         |         |          |
|-------------------|-------------------|---------|---------|----------|
| Week 0            |                   |         |         |          |
|                   | CS                | 0 mg/ml | 8 mg/ml | 36 mg/ml |
| CS                | ..                |         |         |          |
| 0 mg/ml           | 0.66              | ..      |         |          |
| 8 mg/ml           | 0.26              | 0.49    | ..      |          |
| 36 mg/ml          | 0.52              | 0.28    | 0.08    | ..       |
| Week 1            |                   |         |         |          |
| CS                | ..                |         |         |          |
| 0 mg/ml           | 0.15              | ..      |         |          |
| 8 mg/ml           | 0.05              | 0.64    | ..      |          |
| 36 mg/ml          | 0.001             | 0.08    | 0.20    | ..       |
| Week 2            |                   |         |         |          |
| CS                | ..                |         |         |          |
| 0 mg/ml           | 0.08              | ..      |         |          |
| 8 mg/ml           | 0.02              | 0.56    | ..      |          |
| 36 mg/ml          | 0.0003            | 0.06    | 0.19    | ..       |
| Week 4            |                   |         |         |          |
| CS                | ..                |         |         |          |
| 0 mg/ml           | 0.03              | ..      |         |          |
| 8 mg/ml           | 0.004             | 0.50    | ..      |          |
| 36 mg/ml          | <0.0001           | 0.07    | 0.27    | ..       |
| Week 8            |                   |         |         |          |
| CS                | ..                |         |         |          |
| 0 mg/ml           | 0.04              | ..      |         |          |
| 8 mg/ml           | 0.01 <sup>S</sup> | 0.44    | ..      |          |
| 36 mg/ml          | 0.0001            | 0.07    | 0.30    | ..       |
| Week 12           |                   |         |         |          |
| CS                | ..                |         |         |          |
| 0 mg/ml           | 0.18              | ..      |         |          |
| 8 mg/ml           | 0.01              | 0.25    | ..      |          |
| 36 mg/ml          | 0.0001            | 0.01    | 0.17    | ..       |
| Week 16           |                   |         |         |          |
| CS                | ..                |         |         |          |
| 0 mg/ml           | 0.11              | ..      |         |          |
| 8 mg/ml           | 0.04              | 0.64    | ..      |          |
| 36 mg/ml          | <0.0001           | 0.01    | 0.04    | ..       |
| Week 20           |                   |         |         |          |

|                        |                   |                   |         |          |
|------------------------|-------------------|-------------------|---------|----------|
| CS                     | ..                |                   |         |          |
| 0 mg/ml                | 0.27              | ..                |         |          |
| 8 mg/ml                | 0.01              | 0.16              | ..      |          |
| 36 mg/ml               | <0.0001           | 0.002             | 0.09    | ..       |
| <b>Week 24</b>         |                   |                   |         |          |
| CS                     | ..                |                   |         |          |
| 0 mg/ml                | 0.22              | ..                |         |          |
| 8 mg/ml                | 0.01              | 0.21              | ..      |          |
| 36 mg/ml               | <0.0001           | 0.01 <sup>s</sup> | 0.13    | ..       |
| <b>Adjusted Model*</b> |                   |                   |         |          |
| <b>Week 0</b>          |                   |                   |         |          |
|                        | CS                | 0 mg/ml           | 8 mg/ml | 36 mg/ml |
| CS                     | ..                |                   |         |          |
| 0 mg/ml                | 0.95              | ..                |         |          |
| 8 mg/ml                | 0.47              | 0.51              | ..      |          |
| 36 mg/ml               | 0.83              | 0.79              | 0.36    | ..       |
| <b>Week 1</b>          |                   |                   |         |          |
| CS                     | ..                |                   |         |          |
| 0 mg/ml                | 0.01              | ..                |         |          |
| 8 mg/ml                | 0.0005            | 0.37              | ..      |          |
| 36 mg/ml               | 0.0002            | 0.25              | 0.82    | ..       |
| <b>Week 2</b>          |                   |                   |         |          |
| CS                     | ..                |                   |         |          |
| 0 mg/ml                | 0.01 <sup>s</sup> | ..                |         |          |
| 8 mg/ml                | <0.0001           | 0.27              | ..      |          |
| 36 mg/ml               | <0.0001           | 0.13              | 0.72    | ..       |
| <b>Week 4</b>          |                   |                   |         |          |
| CS                     | ..                |                   |         |          |
| 0 mg/ml                | 0.0005            | ..                |         |          |
| 8 mg/ml                | <0.0001           | 0.20              | ..      |          |
| 36 mg/ml               | <0.0001           | 0.13              | 0.84    | ..       |
| <b>Week 8</b>          |                   |                   |         |          |
| CS                     | ..                |                   |         |          |
| 0 mg/ml                | 0.0003            | ..                |         |          |
| 8 mg/ml                | <0.0001           | 0.30              | ..      |          |
| 36 mg/ml               | <0.0001           | 0.22              | 0.86    | ..       |
| <b>Week 12</b>         |                   |                   |         |          |
| CS                     | ..                |                   |         |          |
| 0 mg/ml                | 0.02              | ..                |         |          |

|                 |                   |       |      |    |
|-----------------|-------------------|-------|------|----|
| <b>8 mg/ml</b>  | <0.0001           | 0.06  | ..   |    |
| <b>36 mg/ml</b> | <0.0001           | 0.02  | 0.72 | .. |
| <b>Week 16</b>  |                   |       |      |    |
| <b>CS</b>       | ..                |       |      |    |
| <b>0 mg/ml</b>  | 0.01 <sup>S</sup> | ..    |      |    |
| <b>8 mg/ml</b>  | 0.0004            | 0.45  | ..   |    |
| <b>36 mg/ml</b> | <0.0001           | 0.02  | 0.14 | .. |
| <b>Week 20</b>  |                   |       |      |    |
| <b>CS</b>       | ..                |       |      |    |
| <b>0 mg/ml</b>  | 0.02              | ..    |      |    |
| <b>8 mg/ml</b>  | <0.0001           | 0.05  | ..   |    |
| <b>36 mg/ml</b> | <0.0001           | 0.003 | 0.34 | .. |
| <b>Week 24</b>  |                   |       |      |    |
| <b>CS</b>       | ..                |       |      |    |
| <b>0 mg/ml</b>  | 0.02              | ..    |      |    |
| <b>8 mg/ml</b>  | <0.0001           | 0.06  | ..   |    |
| <b>36 mg/ml</b> | <0.0001           | 0.01  | 0.50 | .. |

Note: CS, cigarette substitute. The adjusted model included the following covariates: site, gender, age, race/ethnicity, week 0 exhaled CO, week 0 cigarettes smoked per day, education level, week 0 Kessler K6 score, week 0 Penn State Cigarette Dependence Index score, and week 0 forced expiratory volume in one second.

\* Bonferroni correction  $\alpha=0.008$ , between all conditions.

S Significant difference between cigarette substitute and 8 mg/ml at week 8 in unadjusted model,  $p=0.005$ ; significant difference between 0 mg/ml and 36 mg/ml at week 24 in unadjusted model,  $p=0.006$ ; significant difference between cigarette substitute and 0 mg/ml at week 2 in adjusted model with  $p=0.005$ ; significant difference between cigarette substitute and 0 mg/ml at week 16 in adjusted model with  $p=0.005$ . All compared to Bonferroni correction  $\alpha=0.05/6=0.00833$ .

**Table S61. P-values for pairwise comparisons relative to baseline within each condition for cigarettes smoked per day using multiple imputation method**

| <b>Unadjusted Model*</b> |           |                |                |                 |
|--------------------------|-----------|----------------|----------------|-----------------|
|                          | <b>CS</b> | <b>0 mg/ml</b> | <b>8 mg/ml</b> | <b>36 mg/ml</b> |
| <b>Week 1</b>            | <0.0001   | <0.0001        | <0.0001        | <0.0001         |
| <b>Week 2</b>            | <0.0001   | <0.0001        | <0.0001        | <0.0001         |
| <b>Week 4</b>            | <0.0001   | <0.0001        | <0.0001        | <0.0001         |
| <b>Week 8</b>            | <0.0001   | <0.0001        | <0.0001        | <0.0001         |
| <b>Week 12</b>           | <0.0001   | <0.0001        | <0.0001        | <0.0001         |
| <b>Week 16</b>           | <0.0001   | <0.0001        | <0.0001        | <0.0001         |
| <b>Week 20</b>           | <0.0001   | <0.0001        | <0.0001        | <0.0001         |
| <b>Week 24</b>           | <0.0001   | <0.0001        | <0.0001        | <0.0001         |
| <b>Adjusted Model*</b>   |           |                |                |                 |
|                          | <b>CS</b> | <b>0 mg/ml</b> | <b>8 mg/ml</b> | <b>36 mg/ml</b> |
| <b>Week 1</b>            | <0.0001   | <0.0001        | <0.0001        | <0.0001         |
| <b>Week 2</b>            | <0.0001   | <0.0001        | <0.0001        | <0.0001         |
| <b>Week 4</b>            | <0.0001   | <0.0001        | <0.0001        | <0.0001         |
| <b>Week 8</b>            | <0.0001   | <0.0001        | <0.0001        | <0.0001         |
| <b>Week 12</b>           | <0.0001   | <0.0001        | <0.0001        | <0.0001         |
| <b>Week 16</b>           | <0.0001   | <0.0001        | <0.0001        | <0.0001         |
| <b>Week 20</b>           | <0.0001   | <0.0001        | <0.0001        | <0.0001         |
| <b>Week 24</b>           | <0.0001   | <0.0001        | <0.0001        | <0.0001         |

Note: CS, cigarette substitute. The adjusted model included the following covariates: site, gender, age, race/ethnicity, week 0 exhaled CO, week 0 cigarettes smoked per day, education level, week 0 Kessler K6 score, week 0 Penn State Cigarette Dependence Index score, and week 0 forced expiratory volume in one second.

\* Bonferroni correction alpha=0.006, relative to baseline (week 0).

**Table S62. P-values for pairwise comparisons relative to baseline within each condition for cigarettes smoked per day using intent-to-treat method**

| Unadjusted Model* |         |         |         |          |
|-------------------|---------|---------|---------|----------|
|                   | CS      | 0 mg/ml | 8 mg/ml | 36 mg/ml |
| Week 1            | <0.0001 | <0.0001 | <0.0001 | <0.0001  |
| Week 2            | <0.0001 | <0.0001 | <0.0001 | <0.0001  |
| Week 4            | <0.0001 | <0.0001 | <0.0001 | <0.0001  |
| Week 8            | <0.0001 | <0.0001 | <0.0001 | <0.0001  |
| Week 12           | <0.0001 | <0.0001 | <0.0001 | <0.0001  |
| Week 16           | <0.0001 | <0.0001 | <0.0001 | <0.0001  |
| Week 20           | <0.0001 | <0.0001 | <0.0001 | <0.0001  |
| Week 24           | <0.0001 | <0.0001 | <0.0001 | <0.0001  |
| Adjusted Model*   |         |         |         |          |
|                   | CS      | 0 mg/ml | 8 mg/ml | 36 mg/ml |
| Week 1            | <0.0001 | <0.0001 | <0.0001 | <0.0001  |
| Week 2            | <0.0001 | <0.0001 | <0.0001 | <0.0001  |
| Week 4            | <0.0001 | <0.0001 | <0.0001 | <0.0001  |
| Week 8            | <0.0001 | <0.0001 | <0.0001 | <0.0001  |
| Week 12           | <0.0001 | <0.0001 | <0.0001 | <0.0001  |
| Week 16           | <0.0001 | <0.0001 | <0.0001 | <0.0001  |
| Week 20           | <0.0001 | <0.0001 | <0.0001 | <0.0001  |
| Week 24           | <0.0001 | <0.0001 | <0.0001 | <0.0001  |

Note: CS, cigarette substitute. The adjusted model included the following covariates: site, gender, age, race/ethnicity, week 0 exhaled CO, week 0 cigarettes smoked per day, education level, week 0 Kessler K6 score, week 0 Penn State Cigarette Dependence Index score, and week 0 forced expiratory volume in one second.

\* Bonferroni correction alpha=0.006, relative to baseline (week 0).



**Table S63. P-values for pairwise comparisons relative to baseline within each condition for cigarettes smoked per day using per-protocol method**

| <b>Unadjusted Model*</b> |           |                |                |                 |
|--------------------------|-----------|----------------|----------------|-----------------|
|                          | <b>CS</b> | <b>0 mg/ml</b> | <b>8 mg/ml</b> | <b>36 mg/ml</b> |
| <b>Week 1</b>            | <0.0001   | <0.0001        | <0.0001        | <0.0001         |
| <b>Week 2</b>            | <0.0001   | <0.0001        | <0.0001        | <0.0001         |
| <b>Week 4</b>            | <0.0001   | <0.0001        | <0.0001        | <0.0001         |
| <b>Week 8</b>            | <0.0001   | <0.0001        | <0.0001        | <0.0001         |
| <b>Week 12</b>           | <0.0001   | <0.0001        | <0.0001        | <0.0001         |
| <b>Week 16</b>           | <0.0001   | <0.0001        | <0.0001        | <0.0001         |
| <b>Week 20</b>           | <0.0001   | <0.0001        | <0.0001        | <0.0001         |
| <b>Week 24</b>           | <0.0001   | <0.0001        | <0.0001        | <0.0001         |
| <b>Adjusted Model*</b>   |           |                |                |                 |
|                          | <b>CS</b> | <b>0 mg/ml</b> | <b>8 mg/ml</b> | <b>36 mg/ml</b> |
| <b>Week 1</b>            | <0.0001   | <0.0001        | <0.0001        | <0.0001         |
| <b>Week 2</b>            | <0.0001   | <0.0001        | <0.0001        | <0.0001         |
| <b>Week 4</b>            | <0.0001   | <0.0001        | <0.0001        | <0.0001         |
| <b>Week 8</b>            | <0.0001   | <0.0001        | <0.0001        | <0.0001         |
| <b>Week 12</b>           | <0.0001   | <0.0001        | <0.0001        | <0.0001         |
| <b>Week 16</b>           | <0.0001   | <0.0001        | <0.0001        | <0.0001         |
| <b>Week 20</b>           | <0.0001   | <0.0001        | <0.0001        | <0.0001         |
| <b>Week 24</b>           | <0.0001   | <0.0001        | <0.0001        | <0.0001         |

Note: CS, cigarette substitute. The adjusted model included the following covariates: site, gender, age, race/ethnicity, week 0 exhaled CO, week 0 cigarettes smoked per day, education level, week 0 Kessler K6 score, week 0 Penn State Cigarette Dependence Index score, and week 0 forced expiratory volume in one second.

\* Bonferroni correction alpha=0.006, relative to baseline (week 0).

**Table S64. P-values for pairwise comparisons relative to baseline within each condition for cigarettes smoked per day using baseline-carried-forward method**

| <b>Unadjusted Model*</b> |           |                |                |                 |
|--------------------------|-----------|----------------|----------------|-----------------|
|                          | <b>CS</b> | <b>0 mg/ml</b> | <b>8 mg/ml</b> | <b>36 mg/ml</b> |
| <b>Week 1</b>            | <0.0001   | <0.0001        | <0.0001        | <0.0001         |
| <b>Week 2</b>            | <0.0001   | <0.0001        | <0.0001        | <0.0001         |
| <b>Week 4</b>            | <0.0001   | <0.0001        | <0.0001        | <0.0001         |
| <b>Week 8</b>            | <0.0001   | <0.0001        | <0.0001        | <0.0001         |
| <b>Week 12</b>           | <0.0001   | <0.0001        | <0.0001        | <0.0001         |
| <b>Week 16</b>           | <0.0001   | <0.0001        | <0.0001        | <0.0001         |
| <b>Week 20</b>           | <0.0001   | <0.0001        | <0.0001        | <0.0001         |
| <b>Week 24</b>           | <0.0001   | <0.0001        | <0.0001        | <0.0001         |
| <b>Adjusted Model*</b>   |           |                |                |                 |
|                          | <b>CS</b> | <b>0 mg/ml</b> | <b>8 mg/ml</b> | <b>36 mg/ml</b> |
| <b>Week 1</b>            | <0.0001   | <0.0001        | <0.0001        | <0.0001         |
| <b>Week 2</b>            | <0.0001   | <0.0001        | <0.0001        | <0.0001         |
| <b>Week 4</b>            | <0.0001   | <0.0001        | <0.0001        | <0.0001         |
| <b>Week 8</b>            | <0.0001   | <0.0001        | <0.0001        | <0.0001         |
| <b>Week 12</b>           | <0.0001   | <0.0001        | <0.0001        | <0.0001         |
| <b>Week 16</b>           | <0.0001   | <0.0001        | <0.0001        | <0.0001         |
| <b>Week 20</b>           | <0.0001   | <0.0001        | <0.0001        | <0.0001         |
| <b>Week 24</b>           | <0.0001   | <0.0001        | <0.0001        | <0.0001         |

Note: CS, cigarette substitute. The adjusted model included the following covariates: site, gender, age, race/ethnicity, week 0 exhaled CO, week 0 cigarettes smoked per day, education level, week 0 Kessler K6 score, week 0 Penn State Cigarette Dependence Index score, and week 0 forced expiratory volume in one second.

\* Bonferroni correction alpha=0.006, relative to baseline (week 0).

**Table S65. P-values for pairwise comparisons relative to baseline within each condition for cigarettes smoked per day using last-observation-carried-forward method**

| <b>Unadjusted Model*</b> |         |         |         |          |
|--------------------------|---------|---------|---------|----------|
|                          | CS      | 0 mg/ml | 8 mg/ml | 36 mg/ml |
| <b>Week 1</b>            | <0.0001 | <0.0001 | <0.0001 | <0.0001  |
| <b>Week 2</b>            | <0.0001 | <0.0001 | <0.0001 | <0.0001  |
| <b>Week 4</b>            | <0.0001 | <0.0001 | <0.0001 | <0.0001  |
| <b>Week 8</b>            | <0.0001 | <0.0001 | <0.0001 | <0.0001  |
| <b>Week 12</b>           | <0.0001 | <0.0001 | <0.0001 | <0.0001  |
| <b>Week 16</b>           | <0.0001 | <0.0001 | <0.0001 | <0.0001  |
| <b>Week 20</b>           | <0.0001 | <0.0001 | <0.0001 | <0.0001  |
| <b>Week 24</b>           | <0.0001 | <0.0001 | <0.0001 | <0.0001  |
| <b>Adjusted Model*</b>   |         |         |         |          |
|                          | CS      | 0 mg/ml | 8 mg/ml | 36 mg/ml |
| <b>Week 1</b>            | <0.0001 | <0.0001 | <0.0001 | <0.0001  |
| <b>Week 2</b>            | <0.0001 | <0.0001 | <0.0001 | <0.0001  |
| <b>Week 4</b>            | <0.0001 | <0.0001 | <0.0001 | <0.0001  |
| <b>Week 8</b>            | <0.0001 | <0.0001 | <0.0001 | <0.0001  |
| <b>Week 12</b>           | <0.0001 | <0.0001 | <0.0001 | <0.0001  |
| <b>Week 16</b>           | <0.0001 | <0.0001 | <0.0001 | <0.0001  |
| <b>Week 20</b>           | <0.0001 | <0.0001 | <0.0001 | <0.0001  |
| <b>Week 24</b>           | <0.0001 | <0.0001 | <0.0001 | <0.0001  |

Note: CS, cigarette substitute. The adjusted model included the following covariates: site, gender, age, race/ethnicity, week 0 exhaled CO, week 0 cigarettes smoked per day, education level, week 0 Kessler K6 score, week 0 Penn State Cigarette Dependence Index score, and week 0 forced expiratory volume in one second.

\* Bonferroni correction alpha=0.006, relative to baseline (week 0).

**Table S66. Study product use percentages using intent-to-treat method (with assumption of no use to missing study product usage logs)**

| Percent using study product, %, (n) | CS          | 0 mg/ml     | 8 mg/ml     | 36 mg/ml    |
|-------------------------------------|-------------|-------------|-------------|-------------|
| Week 1                              | 86·92 (113) | 85·38 (111) | 87·69 (114) | 89·23 (116) |
| Week 2                              | 77·69 (101) | 75·38 (98)  | 84·62 (110) | 84·62 (110) |
| Week 4                              | 71·54 (93)  | 66·92 (87)  | 75·38 (98)  | 81·54 (106) |
| Week 8                              | 44·62 (58)  | 54·62 (71)  | 56·92 (74)  | 60·77 (79)  |
| Week 12                             | 41·54 (54)  | 42·31 (55)  | 52·31 (68)  | 55·38 (72)  |
| Week 16                             | 34·62 (45)  | 43·08 (56)  | 43·85 (57)  | 53·85 (70)  |
| Week 20                             | 36·15 (47)  | 35·38 (46)  | 40·77 (53)  | 48·46 (63)  |
| Week 24                             | 33·08 (43)  | 36·15 (47)  | 37·69 (49)  | 47·69 (62)  |

Note: CS, cigarette substitute. Participants with missing study product usage logs were assumed no use of study product. Denominator for calculating the percent using is always 130 for every condition.

**Table S67. Study product use percentages using intent-to-treat method (with no assumption on missing study product usage logs)**

| <b>Percent using study product, %, (n)</b> | <b>CS</b>   | <b>0 mg/ml</b> | <b>8 mg/ml</b> | <b>36 mg/ml</b> |
|--------------------------------------------|-------------|----------------|----------------|-----------------|
| <b>Week 1</b>                              | 93·39 (113) | 99·11 (111)    | 98·28 (114)    | 96·67 (116)     |
| <b>Week 2</b>                              | 87·83 (101) | 94·23 (98)     | 94·83 (110)    | 97·35 (110)     |
| <b>Week 4</b>                              | 80·87 (93)  | 90·63 (87)     | 89·09 (98)     | 94·64 (106)     |
| <b>Week 8</b>                              | 61·05 (58)  | 84·52 (71)     | 80·43 (74)     | 83·16 (79)      |
| <b>Week 12</b>                             | 58·70 (54)  | 70·51 (55)     | 80·00 (68)     | 77·42 (72)      |
| <b>Week 16</b>                             | 52·33 (45)  | 78·87 (56)     | 73·08 (57)     | 83·33 (70)      |
| <b>Week 20</b>                             | 54·65 (47)  | 70·77 (46)     | 73·61 (53)     | 80·77 (63)      |
| <b>Week 24</b>                             | 47·25 (43)  | 68·12 (47)     | 66·22 (49)     | 77·50(62)       |

Note: CS, cigarette substitute. Denominator for calculating the percent using is based on number of participants who reported study product usage and is varied by weeks and conditions.

**Table S68. Study product use percentages using per-protocol method**

| Percent using study product, %, (n) | CS         | 0 mg/ml    | 8 mg/ml    | 36 mg/ml   |
|-------------------------------------|------------|------------|------------|------------|
| Week 1                              | 92.86 (78) | 98.46 (64) | 100 (64)   | 96.15 (75) |
| Week 2                              | 84.52 (71) | 95.45 (63) | 95.52 (64) | 98.72 (77) |
| Week 4                              | 77.91 (67) | 94.03 (63) | 89.55 (60) | 97.47 (77) |
| Week 8                              | 58.75 (47) | 86.36 (57) | 80.30 (53) | 86.67 (65) |
| Week 12                             | 59.30 (51) | 71.64 (48) | 80.60 (54) | 79.75 (63) |
| Week 16                             | 50.62 (41) | 79.69 (51) | 73.44 (47) | 84.42 (65) |
| Week 20                             | 54.32 (44) | 72.13 (44) | 73.85 (48) | 80.52 (62) |
| Week 24                             | 47.67 (41) | 67.16 (45) | 65.67 (44) | 77.22 (61) |

Note: CS, cigarette substitute. Participants with missing study product usage logs were assumed no use of study product. Study sample for pre-protocol method is based on participants who completed weeks 0, 4, 12 and 24. The sample sizes for each condition are CS, N=86; 0 mg/ml, N=67; 8 mg/ml, N=67; 36 mg/ml, N=79, respectively. Participants may be missing study product usage logs at different visits other than weeks 0, 4, 12 and 24. Denominator for calculating the percent using is based on number of participants who reported study product usage and is varied by weeks and conditions.

**Table S69. P-values of between-condition comparisons for study product use percentages using intent-to-treat method (with assumption of no use to missing study product usage logs)**

|                | CS-0 mg/ml | CS-8 mg/ml | CS-36 mg/ml | 0 mg/ml-8 mg/ml | 0 mg/ml-36 mg/ml  | 8 mg/ml-36 mg/ml |
|----------------|------------|------------|-------------|-----------------|-------------------|------------------|
| <b>Week 1</b>  | 0.72       | 0.85       | 0.57        | 0.59            | 0.35              | 0.70             |
| <b>Week 2</b>  | 0.66       | 0.15       | 0.15        | 0.06            | 0.06              | 1.00             |
| <b>Week 4</b>  | 0.42       | 0.48       | 0.06        | 0.13            | 0.01 <sup>S</sup> | 0.23             |
| <b>Week 8</b>  | 0.11       | 0.05       | 0.01        | 0.71            | 0.32              | 0.53             |
| <b>Week 12</b> | 0.90       | 0.08       | 0.03        | 0.11            | 0.04              | 0.62             |
| <b>Week 16</b> | 0.16       | 0.13       | 0.002       | 0.90            | 0.08              | 0.11             |
| <b>Week 20</b> | 0.90       | 0.44       | 0.05        | 0.37            | 0.03              | 0.21             |
| <b>Week 24</b> | 0.60       | 0.44       | 0.02        | 0.80            | 0.06              | 0.10             |

Note: CS, cigarette substitute. Participants with missing study product usage logs were assumed no use of study product. Unless otherwise indicated, Chi-square tests were used. Bonferroni correction alpha=0.008, between conditions comparisons.

S Significant difference between 0 mg/ml and 36 mg/ml at week 4 with p=0.007, comparing to Bonferroni correction alpha=0.05/6=0.0083.

**Table S70. P-values of between-condition comparisons for study product use percentages using intent-to-treat method (with no assumption on missing study product usage logs)**

|                | CS-0 mg/ml | CS-8 mg/ml        | CS-36 mg/ml       | 0 mg/ml-8 mg/ml | 0 mg/ml-36 mg/ml | 8 mg/ml-36 mg/ml |
|----------------|------------|-------------------|-------------------|-----------------|------------------|------------------|
| <b>Week 1</b>  | 0.04*      | 0.10*             | 0.24              | 1.00*           | 0.37*            | 0.68*            |
| <b>Week 2</b>  | 0.10       | 0.06              | 0.01 <sup>S</sup> | 0.85            | 0.32*            | 0.50*            |
| <b>Week 4</b>  | 0.05       | 0.09              | 0.002             | 0.72            | 0.26             | 0.13             |
| <b>Week 8</b>  | 0.0005     | 0.004             | 0.001             | 0.48            | 0.80             | 0.63             |
| <b>Week 12</b> | 0.11       | 0.002             | 0.01 <sup>S</sup> | 0.16            | 0.30             | 0.67             |
| <b>Week 16</b> | 0.0005     | 0.01 <sup>S</sup> | <0.0001           | 0.41            | 0.48             | 0.11             |
| <b>Week 20</b> | 0.04       | 0.01              | 0.0004            | 0.71            | 0.16             | 0.30             |
| <b>Week 24</b> | 0.01       | 0.02              | <0.0001           | 0.81            | 0.20             | 0.12             |

Note: CS, cigarette substitute. Unless otherwise indicated, Chi-square tests were used. Bonferroni correction alpha=0.008, between conditions comparisons.

S Significant difference between cigarette substitute and 8 mg/ml at week 16 with p=0.006; significant difference between cigarette substitute and 36 mg/ml at week 2 with p=0.006; significant difference between cigarette substitute and 36 mg/ml at week 12 with p=0.006, comparing to Bonferroni correction alpha=0.05/6=0.0083.

\* Based on Fisher's Exact tests.



**Table S71. P-values of between-condition comparisons for study product use percentages using per-protocol method**

|                | CS-0 mg/ml        | CS-8 mg/ml        | CS-36 mg/ml       | 0 mg/ml-8 mg/ml | 0 mg/ml-36 mg/ml | 8 mg/ml-36 mg/ml |
|----------------|-------------------|-------------------|-------------------|-----------------|------------------|------------------|
| <b>Week 1</b>  | 0.14*             | 0.04*             | 0.50*             | 1.00*           | 0.63*            | 0.25*            |
| <b>Week 2</b>  | 0.03              | 0.03              | 0.001             | 1.00*           | 0.33*            | 0.34*            |
| <b>Week 4</b>  | 0.01 <sup>S</sup> | 0.06              | 0.0002            | 0.35            | 0.41*            | 0.08*            |
| <b>Week 8</b>  | 0.0002            | 0.01 <sup>S</sup> | 0.0001            | 0.35            | 0.96             | 0.31             |
| <b>Week 12</b> | 0.11              | 0.01 <sup>S</sup> | 0.01 <sup>S</sup> | 0.22            | 0.25             | 0.90             |
| <b>Week 16</b> | 0.0003            | 0.01 <sup>S</sup> | <0.0001           | 0.40            | 0.46             | 0.11             |
| <b>Week 20</b> | 0.03              | 0.02              | 0.0005            | 0.83            | 0.25             | 0.34             |
| <b>Week 24</b> | 0.02              | 0.03              | <0.0001           | 0.85            | 0.17             | 0.12             |

Note: CS, cigarette substitute. Unless otherwise indicated, Chi-square tests were used. Bonferroni correction alpha=0.008, between conditions comparisons.

S Significant difference between cigarette substitute and 0 mg/ml at week 4 with p=0.006; significant differences between cigarette substitute and 8 mg/ml at week 2, 12, and 16, each p=0.005; significant difference between cigarette substitute and 36 mg/ml at week 12 with p=0.005, comparing to Bonferroni correction alpha=0.05/6=0.0083.

\* Based on Fisher's Exact tests.

**Table S72. P-values of relative to week 1 comparisons for study product use percentages using intent-to-treat method (with assumption of no use to missing study product usage logs)**

|         | CS      | 0 mg/ml | 8 mg/ml | 36 mg/ml |
|---------|---------|---------|---------|----------|
| Week 2  | 0.05    | 0.04    | 0.47    | 0.27     |
| Week 4  | 0.002   | 0.0005  | 0.01    | 0.08     |
| Week 8  | <0.0001 | <0.0001 | <0.0001 | <0.0001  |
| Week 12 | <0.0001 | <0.0001 | <0.0001 | <0.0001  |
| Week 16 | <0.0001 | <0.0001 | <0.0001 | <0.0001  |
| Week 20 | <0.0001 | <0.0001 | <0.0001 | <0.0001  |
| Week 24 | <0.0001 | <0.0001 | <0.0001 | <0.0001  |

Note: CS, cigarette substitute. Unless otherwise indicated, Chi-square tests were used. Bonferroni correction alpha=0.007, relative to week 1 comparisons.

**Table S73. P-values of relative to week 1 comparisons for study product use percentages using intent-to-treat method (with no assumption of no use to missing study product usage logs)**

|         | CS      | 0 mg/ml | 8 mg/ml | 36 mg/ml |
|---------|---------|---------|---------|----------|
| Week 2  | 0.14    | 0.06*   | 0.28*   | 1.00     |
| Week 4  | 0.004   | 0.006*  | 0.004   | 0.53*    |
| Week 8  | <0.0001 | <0.0001 | <0.0001 | 0.001    |
| Week 12 | <0.0001 | <0.0001 | <0.0001 | <0.0001  |
| Week 16 | <0.0001 | <0.0001 | <0.0001 | 0.001    |
| Week 20 | <0.0001 | <0.0001 | <0.0001 | 0.0002   |
| Week 24 | <0.0001 | <0.0001 | <0.0001 | <0.0001  |

Note: CS, cigarette substitute. Unless otherwise indicated, Chi-square tests were used. Bonferroni correction  $\alpha=0.007$ , relative to week 1 comparisons.

\* Based on Fisher's Exact tests.

**Table S74. P-values of relative to week 1 comparisons for study product use percentages using per-protocol method**

|         | CS      | 0 mg/ml | 8 mg/ml | 36 mg/ml |
|---------|---------|---------|---------|----------|
| Week 2  | 0.09    | 0.62*   | 0.24*   | 0.62*    |
| Week 4  | 0.006   | 0.37*   | 0.01*   | 0.68*    |
| Week 8  | <0.0001 | 0.02*   | 0.0002  | 0.04     |
| Week 12 | <0.0001 | <0.0001 | 0.0002  | 0.002    |
| Week 16 | <0.0001 | 0.0006  | <0.0001 | 0.01     |
| Week 20 | <0.0001 | <0.0001 | <0.0001 | 0.002    |
| Week 24 | <0.0001 | <0.0001 | <0.0001 | 0.0005   |

Note: CS, cigarette substitute. Unless otherwise indicated, Chi-square tests were used. Bonferroni correction  $\alpha=0.007$ , relative to week 1 comparisons.

\* Based on Fisher's Exact tests.

**Table S75. Summary of adverse events**

| Description                                           |         |      | Week 0, Baseline |         |         |          | Week 1 - Week 24, Intervention Period |         |         |          | Week 25 - Week 36, Follow-up Period |         |         |          |
|-------------------------------------------------------|---------|------|------------------|---------|---------|----------|---------------------------------------|---------|---------|----------|-------------------------------------|---------|---------|----------|
|                                                       | Overall | Pre* | CS               | 0 mg/ml | 8 mg/ml | 36 mg/ml | CS                                    | 0 mg/ml | 8 mg/ml | 36 mg/ml | CS                                  | 0 mg/ml | 8 mg/ml | 36 mg/ml |
| <b>Total events (per symptom)</b>                     | 1185    | 5    | 82               | 84      | 80      | 83       | 135                                   | 169     | 213     | 228      | 26                                  | 27      | 26      | 27       |
| Abdominal pain                                        | 7       | 0    | 0                | 0       | 0       | 0        | 1                                     | 3       | 2       | 1        | 0                                   | 0       | 0       | 0        |
| Adrenal insufficiency                                 | 1       | 0    | 0                | 0       | 0       | 0        | 0                                     | 0       | 0       | 1        | 0                                   | 0       | 0       | 0        |
| Allergic reaction                                     | 8       | 0    | 0                | 0       | 1       | 0        | 1                                     | 1       | 2       | 3        | 0                                   | 0       | 0       | 0        |
| Allergic rhinitis                                     | 7       | 0    | 0                | 0       | 0       | 0        | 0                                     | 2       | 2       | 3        | 0                                   | 0       | 0       | 0        |
| Anaphylaxis                                           | 1       | 0    | 0                | 0       | 0       | 0        | 1                                     | 0       | 0       | 0        | 0                                   | 0       | 0       | 0        |
| Ankle fracture                                        | 1       | 0    | 0                | 0       | 0       | 0        | 0                                     | 1       | 0       | 0        | 0                                   | 0       | 0       | 0        |
| Anxiety                                               | 19      | 0    | 0                | 0       | 0       | 0        | 3                                     | 4       | 5       | 5        | 1                                   | 0       | 0       | 1        |
| Appendicitis/Appendicitis perforated                  | 3       | 0    | 0                | 0       | 0       | 0        | 0                                     | 0       | 2       | 1        | 0                                   | 0       | 0       | 0        |
| Arthragia                                             | 1       | 0    | 0                | 0       | 0       | 0        | 1                                     | 0       | 0       | 0        | 0                                   | 0       | 0       | 0        |
| Arthritis                                             | 4       | 0    | 0                | 0       | 0       | 0        | 2                                     | 1       | 1       | 0        | 0                                   | 0       | 0       | 0        |
| Aspartate aminotransferase increased                  | 2       | 0    | 0                | 0       | 1       | 1        | 0                                     | 0       | 0       | 0        | 0                                   | 0       | 0       | 0        |
| Aspiration                                            | 3       | 0    | 0                | 0       | 0       | 0        | 2                                     | 0       | 0       | 1        | 0                                   | 0       | 0       | 0        |
| Back pain                                             | 25      | 0    | 0                | 0       | 0       | 1        | 4                                     | 3       | 4       | 9        | 2                                   | 1       | 1       | 0        |
| Bladder infection                                     | 2       | 0    | 0                | 0       | 0       | 0        | 1                                     | 0       | 1       | 0        | 0                                   | 0       | 0       | 0        |
| Bloating                                              | 1       | 0    | 0                | 0       | 0       | 0        | 0                                     | 0       | 0       | 1        | 0                                   | 0       | 0       | 0        |
| Blood and lymphatic system disorders - Other, specify | 2       | 0    | 0                | 0       | 1       | 1        | 0                                     | 0       | 0       | 0        | 0                                   | 0       | 0       | 0        |
| Blurred vision                                        | 1       | 0    | 0                | 0       | 0       | 0        | 0                                     | 0       | 0       | 1        | 0                                   | 0       | 0       | 0        |
| Bone pain                                             | 2       | 0    | 0                | 0       | 0       | 0        | 0                                     | 1       | 0       | 0        | 1                                   | 0       | 0       | 0        |
| Bronchial infection                                   | 15      | 0    | 0                | 0       | 0       | 1        | 2                                     | 3       | 4       | 0        | 1                                   | 1       | 0       | 3        |
| Bruising                                              | 2       | 0    | 0                | 0       | 0       | 0        | 2                                     | 0       | 0       | 0        | 0                                   | 0       | 0       | 0        |
| Burn                                                  | 2       | 0    | 0                | 1       | 0       | 0        | 0                                     | 0       | 1       | 0        | 0                                   | 0       | 0       | 0        |
| Cardiac disorders - Other, specify                    | 5       | 0    | 0                | 0       | 0       | 0        | 0                                     | 1       | 0       | 1        | 0                                   | 1       | 0       | 2        |
| Chest pain - cardiac                                  | 7       | 0    | 0                | 0       | 0       | 0        | 2                                     | 1       | 1       | 2        | 0                                   | 1       | 0       | 0        |
| Chest wall pain                                       | 2       | 0    | 0                | 0       | 0       | 0        | 0                                     | 0       | 1       | 1        | 0                                   | 0       | 0       | 0        |
| Cholesterol high                                      | 9       | 0    | 0                | 2       | 1       | 3        | 1                                     | 0       | 1       | 0        | 0                                   | 0       | 1       | 0        |
| Chronic kidney disease                                | 1       | 0    | 1                | 0       | 0       | 0        | 0                                     | 0       | 0       | 0        | 0                                   | 0       | 0       | 0        |
| Colonic obstruction                                   | 1       | 0    | 0                | 0       | 0       | 0        | 0                                     | 0       | 0       | 1        | 0                                   | 0       | 0       | 0        |
| Conjunctivitis                                        | 1       | 0    | 0                | 0       | 0       | 0        | 0                                     | 0       | 0       | 1        | 0                                   | 0       | 0       | 0        |

|                                                                       |    |   |   |   |   |   |   |   |    |   |   |   |   |   |
|-----------------------------------------------------------------------|----|---|---|---|---|---|---|---|----|---|---|---|---|---|
| Constipation                                                          | 4  | 0 | 0 | 1 | 0 | 0 | 1 | 0 | 1  | 1 | 0 | 0 | 0 | 0 |
| Cough                                                                 | 35 | 0 | 0 | 1 | 2 | 0 | 3 | 6 | 14 | 9 | 0 | 0 | 0 | 0 |
| Creatinine increased                                                  | 1  | 0 | 1 | 0 | 0 | 0 | 0 | 0 | 0  | 0 | 0 | 0 | 0 | 0 |
| Death-not otherwise specified                                         | 1  | 1 | 0 | 0 | 0 | 0 | 0 | 0 | 0  | 0 | 0 | 0 | 0 | 0 |
| Dehydration                                                           | 3  | 0 | 0 | 0 | 0 | 0 | 2 | 0 | 1  | 0 | 0 | 0 | 0 | 0 |
| Depressed level of consciousness                                      | 1  | 0 | 0 | 0 | 0 | 0 | 0 | 0 | 0  | 1 | 0 | 0 | 0 | 0 |
| Depressed mood                                                        | 9  | 0 | 1 | 0 | 0 | 0 | 2 | 2 | 1  | 3 | 0 | 0 | 0 | 0 |
| Depression                                                            | 14 | 0 | 0 | 0 | 0 | 0 | 3 | 4 | 4  | 1 | 0 | 1 | 0 | 1 |
| Diarrhea                                                              | 3  | 0 | 0 | 0 | 0 | 0 | 0 | 1 | 1  | 0 | 0 | 0 | 0 | 1 |
| Dizziness                                                             | 8  | 0 | 1 | 0 | 0 | 0 | 1 | 3 | 2  | 1 | 0 | 0 | 0 | 0 |
| Dry cough                                                             | 21 | 0 | 0 | 0 | 0 | 0 | 0 | 4 | 9  | 8 | 0 | 0 | 0 | 0 |
| Dry mouth                                                             | 6  | 0 | 0 | 0 | 0 | 0 | 0 | 1 | 2  | 3 | 0 | 0 | 0 | 0 |
| Dry skin                                                              | 1  | 0 | 0 | 0 | 0 | 0 | 0 | 0 | 0  | 0 | 1 | 0 | 0 | 0 |
| Dyspnea                                                               | 5  | 0 | 0 | 0 | 0 | 0 | 0 | 2 | 1  | 1 | 0 | 1 | 0 | 0 |
| Ear and labyrinth disorders - Other, specify                          | 1  | 0 | 0 | 0 | 0 | 0 | 0 | 1 | 0  | 0 | 0 | 0 | 0 | 0 |
| Edema limbs                                                           | 2  | 0 | 0 | 0 | 0 | 0 | 0 | 0 | 1  | 1 | 0 | 0 | 0 | 0 |
| Epistaxis                                                             | 2  | 0 | 0 | 0 | 0 | 0 | 0 | 0 | 1  | 1 | 0 | 0 | 0 | 0 |
| Eye disorders - Other, specify                                        | 3  | 1 | 0 | 0 | 0 | 0 | 0 | 0 | 1  | 0 | 0 | 1 | 0 | 0 |
| Fall                                                                  | 5  | 1 | 0 | 0 | 0 | 0 | 1 | 1 | 2  | 0 | 0 | 0 | 0 | 0 |
| Fatigue                                                               | 4  | 0 | 1 | 0 | 0 | 0 | 1 | 0 | 2  | 0 | 0 | 0 | 0 | 0 |
| Fever                                                                 | 4  | 0 | 0 | 0 | 1 | 0 | 0 | 0 | 1  | 2 | 0 | 0 | 0 | 0 |
| Flu like symptoms                                                     | 33 | 0 | 1 | 0 | 0 | 2 | 6 | 7 | 8  | 7 | 1 | 1 | 0 | 0 |
| Fracture                                                              | 9  | 0 | 0 | 0 | 1 | 0 | 0 | 1 | 0  | 2 | 2 | 0 | 0 | 3 |
| Gastric ulcer                                                         | 1  | 0 | 0 | 0 | 0 | 0 | 0 | 0 | 0  | 0 | 1 | 0 | 0 | 0 |
| Gastritis                                                             | 1  | 0 | 0 | 0 | 0 | 0 | 0 | 0 | 0  | 1 | 0 | 0 | 0 | 0 |
| Gastroesophageal reflux disease                                       | 2  | 0 | 0 | 0 | 0 | 0 | 0 | 0 | 0  | 2 | 0 | 0 | 0 | 0 |
| Gastrointestinal disorders - Other, specify                           | 8  | 0 | 0 | 0 | 0 | 0 | 2 | 0 | 2  | 4 | 0 | 0 | 0 | 0 |
| Gastrointestinal pain                                                 | 2  | 0 | 0 | 0 | 0 | 0 | 0 | 0 | 2  | 0 | 0 | 0 | 0 | 0 |
| General disorders and administration site conditions - Other, specify | 1  | 0 | 0 | 0 | 0 | 0 | 0 | 1 | 0  | 0 | 0 | 0 | 0 | 0 |
| Generalized muscle weakness                                           | 1  | 0 | 0 | 0 | 0 | 0 | 0 | 0 | 0  | 1 | 0 | 0 | 0 | 0 |
| Gum infection                                                         | 2  | 0 | 0 | 0 | 0 | 0 | 0 | 1 | 0  | 0 | 0 | 0 | 1 | 0 |

|                                                                 |    |   |   |   |   |   |   |    |    |    |   |   |   |   |
|-----------------------------------------------------------------|----|---|---|---|---|---|---|----|----|----|---|---|---|---|
| Hallucinations                                                  | 1  | 0 | 0 | 0 | 0 | 0 | 0 | 1  | 0  | 0  | 0 | 0 | 0 | 0 |
| Headache                                                        | 31 | 0 | 0 | 0 | 0 | 0 | 2 | 9  | 10 | 10 | 0 | 0 | 0 | 0 |
| Heart failure                                                   | 1  | 0 | 0 | 0 | 0 | 0 | 0 | 0  | 0  | 0  | 0 | 0 | 0 | 1 |
| Hepatobiliary disorders                                         | 1  | 0 | 0 | 0 | 0 | 0 | 0 | 0  | 0  | 1  | 0 | 0 | 0 | 0 |
| Hepatobiliary disorders - other                                 | 1  | 0 | 0 | 0 | 0 | 0 | 0 | 0  | 0  | 0  | 0 | 1 | 0 | 0 |
| Hiccups                                                         | 2  | 0 | 0 | 0 | 0 | 0 | 0 | 0  | 0  | 2  | 0 | 0 | 0 | 0 |
| Hyperglycemia                                                   | 2  | 0 | 0 | 0 | 1 | 0 | 0 | 0  | 0  | 0  | 0 | 0 | 1 | 0 |
| Hyperkalemia                                                    | 3  | 0 | 1 | 1 | 1 | 0 | 0 | 0  | 0  | 0  | 0 | 0 | 0 | 0 |
| Hypertension                                                    | 50 | 0 | 2 | 4 | 3 | 3 | 6 | 10 | 8  | 9  | 2 | 1 | 1 | 1 |
| Hypertriglyceridemia                                            | 12 | 0 | 2 | 3 | 2 | 3 | 0 | 0  | 1  | 1  | 0 | 0 | 0 | 0 |
| Hypocalcemia                                                    | 1  | 0 | 0 | 0 | 0 | 0 | 0 | 0  | 0  | 1  | 0 | 0 | 0 | 0 |
| Hypoglycemia                                                    | 1  | 0 | 0 | 0 | 0 | 0 | 1 | 0  | 0  | 0  | 0 | 0 | 0 | 0 |
| Hyponatremia                                                    | 1  | 0 | 0 | 1 | 0 | 0 | 0 | 0  | 0  | 0  | 0 | 0 | 0 | 0 |
| Increased appetite                                              | 1  | 0 | 0 | 0 | 0 | 0 | 0 | 0  | 1  | 0  | 0 | 0 | 0 | 0 |
| Infections and infestations - Other, specify                    | 7  | 0 | 0 | 0 | 0 | 0 | 1 | 1  | 1  | 3  | 0 | 1 | 0 | 0 |
| Injury, poisoning and procedural complications                  | 5  | 0 | 0 | 1 | 0 | 0 | 0 | 1  | 1  | 1  | 0 | 0 | 1 | 0 |
| Injury, poisoning and procedural complications - Other, specify | 20 | 0 | 0 | 0 | 0 | 0 | 5 | 1  | 6  | 4  | 2 | 0 | 2 | 0 |
| Investigations - Other, specify                                 | 10 | 0 | 2 | 1 | 2 | 3 | 0 | 2  | 0  | 0  | 0 | 0 | 0 | 0 |
| Irritability                                                    | 5  | 0 | 0 | 0 | 0 | 0 | 2 | 0  | 2  | 1  | 0 | 0 | 0 | 0 |
| Joint range of motion decreased                                 | 2  | 0 | 0 | 0 | 0 | 0 | 1 | 1  | 0  | 0  | 0 | 0 | 0 | 0 |
| Laryngitis                                                      | 2  | 0 | 0 | 0 | 0 | 0 | 1 | 0  | 0  | 1  | 0 | 0 | 0 | 0 |
| Lethargy                                                        | 1  | 0 | 0 | 0 | 0 | 0 | 0 | 0  | 1  | 0  | 0 | 0 | 0 | 0 |
| Leukocytosis                                                    | 1  | 0 | 1 | 0 | 0 | 0 | 0 | 0  | 0  | 0  | 0 | 0 | 0 | 0 |
| Lung infection                                                  | 2  | 0 | 0 | 1 | 0 | 0 | 0 | 0  | 0  | 0  | 1 | 0 | 0 | 0 |
| Lymph node pain                                                 | 1  | 0 | 0 | 0 | 0 | 0 | 0 | 0  | 0  | 1  | 0 | 0 | 0 | 0 |
| Metabolism and nutrition disorders - Other, specify             | 2  | 0 | 0 | 0 | 0 | 0 | 0 | 0  | 1  | 1  | 0 | 0 | 0 | 0 |
| Mitral valve disease                                            | 1  | 0 | 0 | 0 | 0 | 0 | 0 | 0  | 0  | 0  | 0 | 0 | 0 | 1 |
| Mouth ulcers                                                    | 16 | 0 | 1 | 0 | 0 | 0 | 0 | 3  | 6  | 5  | 1 | 0 | 0 | 0 |
| Mucus in throat/sinus                                           | 5  | 0 | 0 | 0 | 1 | 0 | 0 | 3  | 1  | 0  | 0 | 0 | 0 | 0 |
| Musculoskeletal and connective tissue disorder - Other, specify | 6  | 0 | 0 | 0 | 0 | 0 | 1 | 0  | 4  | 1  | 0 | 0 | 0 | 0 |
| Musculoskeletal deformity                                       | 1  | 0 | 0 | 0 | 0 | 0 | 0 | 1  | 0  | 0  | 0 | 0 | 0 | 0 |

|                                                                                           |     |   |    |    |    |    |    |    |    |    |   |   |   |   |
|-------------------------------------------------------------------------------------------|-----|---|----|----|----|----|----|----|----|----|---|---|---|---|
| Myocardial infarction                                                                     | 1   | 0 | 0  | 0  | 0  | 0  | 0  | 0  | 0  | 0  | 0 | 0 | 0 | 1 |
| Nasal congestion                                                                          | 34  | 0 | 1  | 0  | 0  | 2  | 6  | 5  | 7  | 9  | 0 | 0 | 2 | 2 |
| Nausea                                                                                    | 19  | 0 | 0  | 0  | 0  | 0  | 2  | 2  | 7  | 6  | 1 | 0 | 1 | 0 |
| Neck pain                                                                                 | 1   | 0 | 0  | 0  | 0  | 0  | 0  | 0  | 0  | 1  | 0 | 0 | 0 | 0 |
| Neoplasms benign, malignant and unspecified (including cysts and polyps) - Other, specify | 7   | 0 | 0  | 0  | 0  | 0  | 1  | 1  | 1  | 1  | 0 | 2 | 0 | 1 |
| Nervous system disorders - Other, specify                                                 | 1   | 0 | 0  | 0  | 0  | 0  | 0  | 0  | 0  | 0  | 0 | 0 | 0 | 1 |
| Non-cardiac chest pain                                                                    | 1   | 0 | 0  | 0  | 0  | 0  | 1  | 0  | 0  | 0  | 0 | 0 | 0 | 0 |
| Non-MedDRA - Bad taste resulting from dry puff                                            | 1   | 0 | 0  | 0  | 0  | 0  | 0  | 0  | 1  | 0  | 0 | 0 | 0 | 0 |
| Oral pain                                                                                 | 7   | 1 | 0  | 0  | 0  | 0  | 1  | 1  | 2  | 0  | 1 | 0 | 0 | 1 |
| Pain                                                                                      | 20  | 0 | 0  | 1  | 0  | 0  | 6  | 2  | 3  | 6  | 0 | 1 | 1 | 0 |
| Pain in extremity                                                                         | 6   | 0 | 0  | 0  | 0  | 0  | 2  | 1  | 2  | 0  | 0 | 0 | 1 | 0 |
| Palpitations                                                                              | 1   | 0 | 0  | 0  | 0  | 0  | 0  | 1  | 0  | 0  | 0 | 0 | 0 | 0 |
| Paresthesia                                                                               | 1   | 0 | 0  | 0  | 0  | 0  | 0  | 0  | 0  | 1  | 0 | 0 | 0 | 0 |
| Pharyngitis                                                                               | 3   | 0 | 0  | 0  | 0  | 0  | 2  | 0  | 1  | 0  | 0 | 0 | 0 | 0 |
| Pneumonitis                                                                               | 3   | 0 | 0  | 0  | 0  | 0  | 1  | 0  | 0  | 2  | 0 | 0 | 0 | 0 |
| Productive cough                                                                          | 1   | 0 | 0  | 0  | 0  | 0  | 0  | 0  | 1  | 0  | 0 | 0 | 0 | 0 |
| Prostate infection                                                                        | 1   | 0 | 0  | 0  | 0  | 0  | 0  | 0  | 0  | 0  | 0 | 0 | 0 | 1 |
| Pruritus                                                                                  | 1   | 0 | 0  | 0  | 0  | 1  | 0  | 0  | 0  | 0  | 0 | 0 | 0 | 0 |
| Psychiatric disorders - Other, specify                                                    | 8   | 0 | 0  | 0  | 0  | 0  | 2  | 0  | 3  | 2  | 0 | 0 | 1 | 0 |
| Rash                                                                                      | 2   | 0 | 0  | 0  | 0  | 0  | 0  | 0  | 2  | 0  | 0 | 0 | 0 | 0 |
| Rectal obstruction                                                                        | 1   | 0 | 0  | 0  | 0  | 0  | 0  | 1  | 0  | 0  | 0 | 0 | 0 | 0 |
| Reproductive system and breast disorders - Other, specify                                 | 5   | 0 | 0  | 0  | 0  | 0  | 1  | 0  | 1  | 2  | 0 | 1 | 0 | 0 |
| Respiratory, thoracic and mediastinal disorders - Other, specify                          | 339 | 0 | 62 | 63 | 59 | 61 | 22 | 16 | 15 | 26 | 3 | 7 | 4 | 1 |
| Rhinitis                                                                                  | 1   | 0 | 0  | 0  | 0  | 0  | 0  | 0  | 0  | 1  | 0 | 0 | 0 | 0 |
| Seizure                                                                                   | 1   | 0 | 0  | 0  | 1  | 0  | 0  | 0  | 0  | 0  | 0 | 0 | 0 | 0 |
| Shortness of breath                                                                       | 3   | 0 | 0  | 0  | 0  | 0  | 1  | 1  | 1  | 0  | 0 | 0 | 0 | 0 |
| Sinus disorder                                                                            | 1   | 0 | 0  | 0  | 0  | 0  | 0  | 1  | 0  | 0  | 0 | 0 | 0 | 0 |
| Sinus pain                                                                                | 2   | 0 | 0  | 0  | 0  | 0  | 0  | 1  | 1  | 0  | 0 | 0 | 0 | 0 |
| Sinus tachycardia                                                                         | 2   | 0 | 0  | 0  | 0  | 0  | 0  | 1  | 1  | 0  | 0 | 0 | 0 | 0 |
| Sinusitis                                                                                 | 16  | 0 | 1  | 0  | 0  | 0  | 3  | 3  | 5  | 1  | 0 | 1 | 1 | 1 |



|                                                                |    |   |   |   |   |   |   |   |    |    |    |   |   |   |   |
|----------------------------------------------------------------|----|---|---|---|---|---|---|---|----|----|----|---|---|---|---|
| <b>Skin and subcutaneous tissue disorders - Other, specify</b> | 7  | 0 | 1 | 0 | 0 | 0 | 0 | 1 | 2  | 2  | 1  | 0 | 0 | 0 | 0 |
| <b>Skin infection</b>                                          | 2  | 0 | 0 | 0 | 0 | 0 | 0 | 0 | 0  | 0  | 1  | 0 | 1 | 0 | 0 |
| <b>Sore throat</b>                                             | 27 | 0 | 1 | 0 | 0 | 0 | 0 | 0 | 7  | 6  | 11 | 1 | 0 | 1 | 0 |
| <b>Stomach pain</b>                                            | 2  | 0 | 0 | 0 | 0 | 0 | 0 | 1 | 1  | 0  | 0  | 0 | 0 | 0 | 0 |
| <b>Stroke</b>                                                  | 1  | 0 | 0 | 0 | 0 | 0 | 0 | 0 | 0  | 1  | 0  | 0 | 0 | 0 | 0 |
| <b>Suicidal ideation</b>                                       | 2  | 0 | 0 | 0 | 0 | 0 | 0 | 0 | 1  | 0  | 0  | 0 | 1 | 0 | 0 |
| <b>Suicide attempt</b>                                         | 1  | 0 | 0 | 0 | 0 | 0 | 0 | 0 | 1  | 0  | 0  | 0 | 0 | 0 | 0 |
| <b>Surgical and medical procedures - Other, specify</b>        | 46 | 0 | 0 | 0 | 0 | 0 | 0 | 7 | 10 | 7  | 14 | 2 | 1 | 4 | 1 |
| <b>Syncope</b>                                                 | 2  | 0 | 0 | 0 | 0 | 0 | 1 | 0 | 1  | 0  | 0  | 0 | 0 | 0 | 0 |
| <b>Throat irritation</b>                                       | 4  | 0 | 0 | 0 | 0 | 0 | 0 | 0 | 1  | 1  | 2  | 0 | 0 | 0 | 0 |
| <b>Tooth infection</b>                                         | 5  | 0 | 0 | 0 | 0 | 0 | 0 | 1 | 4  | 0  | 0  | 0 | 0 | 0 | 0 |
| <b>Toothache</b>                                               | 11 | 0 | 0 | 0 | 1 | 0 | 0 | 2 | 3  | 2  | 1  | 1 | 1 | 0 | 0 |
| <b>Tremor</b>                                                  | 1  | 0 | 0 | 0 | 0 | 0 | 0 | 0 | 0  | 0  | 0  | 0 | 0 | 0 | 1 |
| <b>Upper respiratory infection</b>                             | 49 | 1 | 1 | 3 | 1 | 0 | 0 | 4 | 10 | 13 | 13 | 1 | 0 | 1 | 1 |
| <b>Urinary tract infection</b>                                 | 4  | 0 | 0 | 0 | 0 | 0 | 0 | 2 | 0  | 1  | 1  | 0 | 0 | 0 | 0 |
| <b>Vomiting</b>                                                | 4  | 0 | 0 | 0 | 0 | 0 | 0 | 1 | 1  | 0  | 1  | 0 | 0 | 0 | 1 |
| <b>Watering eyes</b>                                           | 2  | 0 | 0 | 0 | 0 | 0 | 0 | 0 | 1  | 0  | 1  | 0 | 0 | 0 | 0 |
| <b>Wheezing</b>                                                | 1  | 0 | 0 | 0 | 0 | 0 | 0 | 0 | 0  | 0  | 0  | 0 | 0 | 1 | 0 |
| <b>Wound infection</b>                                         | 1  | 0 | 0 | 0 | 0 | 0 | 0 | 0 | 0  | 0  | 1  | 0 | 0 | 0 | 0 |

Note: CS, cigarette substitute.

\*Pre-randomisation

**Table S76. Number of participants with an event**

| Description                                           |         |      | Week 0, Baseline |         |         |          | Week 1 - Week 24, Intervention Period |         |         |          | Week 25 - Week 36, Follow-up Period |         |         |          |
|-------------------------------------------------------|---------|------|------------------|---------|---------|----------|---------------------------------------|---------|---------|----------|-------------------------------------|---------|---------|----------|
|                                                       | Overall | Pre* | CS               | 0 mg/ml | 8 mg/ml | 36 mg/ml | CS                                    | 0 mg/ml | 8 mg/ml | 36 mg/ml | CS                                  | 0 mg/ml | 8 mg/ml | 36 mg/ml |
| <b>Total number of participant-events</b>             | 1159    | 5    | 81               | 81      | 80      | 83       | 130                                   | 164     | 208     | 222      | 26                                  | 26      | 26      | 27       |
| Abdominal pain                                        | 7       | 0    | 0                | 0       | 0       | 0        | 1                                     | 3       | 2       | 1        | 0                                   | 0       | 0       | 0        |
| Adrenal insufficiency                                 | 1       | 0    | 0                | 0       | 0       | 0        | 0                                     | 0       | 0       | 1        | 0                                   | 0       | 0       | 0        |
| Allergic reaction                                     | 7       | 0    | 0                | 0       | 1       | 0        | 1                                     | 1       | 1       | 3        | 0                                   | 0       | 0       | 0        |
| Allergic rhinitis                                     | 7       | 0    | 0                | 0       | 0       | 0        | 0                                     | 2       | 2       | 3        | 0                                   | 0       | 0       | 0        |
| Anaphylaxis                                           | 1       | 0    | 0                | 0       | 0       | 0        | 1                                     | 0       | 0       | 0        | 0                                   | 0       | 0       | 0        |
| Ankle fracture                                        | 1       | 0    | 0                | 0       | 0       | 0        | 0                                     | 1       | 0       | 0        | 0                                   | 0       | 0       | 0        |
| Anxiety                                               | 18      | 0    | 0                | 0       | 0       | 0        | 2                                     | 4       | 5       | 5        | 1                                   | 0       | 0       | 1        |
| Appendicitis/Appendicitis perforated                  | 3       | 0    | 0                | 0       | 0       | 0        | 0                                     | 0       | 2       | 1        | 0                                   | 0       | 0       | 0        |
| Arthragia                                             | 1       | 0    | 0                | 0       | 0       | 0        | 1                                     | 0       | 0       | 0        | 0                                   | 0       | 0       | 0        |
| Arthritis                                             | 4       | 0    | 0                | 0       | 0       | 0        | 2                                     | 1       | 1       | 0        | 0                                   | 0       | 0       | 0        |
| Aspartate aminotransferase increased                  | 2       | 0    | 0                | 0       | 1       | 1        | 0                                     | 0       | 0       | 0        | 0                                   | 0       | 0       | 0        |
| Aspiration                                            | 3       | 0    | 0                | 0       | 0       | 0        | 2                                     | 0       | 0       | 1        | 0                                   | 0       | 0       | 0        |
| Back pain                                             | 25      | 0    | 0                | 0       | 0       | 1        | 4                                     | 3       | 4       | 9        | 2                                   | 1       | 1       | 0        |
| Bladder infection                                     | 2       | 0    | 0                | 0       | 0       | 0        | 1                                     | 0       | 1       | 0        | 0                                   | 0       | 0       | 0        |
| Bloating                                              | 1       | 0    | 0                | 0       | 0       | 0        | 0                                     | 0       | 0       | 1        | 0                                   | 0       | 0       | 0        |
| Blood and lymphatic system disorders - Other, specify | 2       | 0    | 0                | 0       | 1       | 1        | 0                                     | 0       | 0       | 0        | 0                                   | 0       | 0       | 0        |
| Blurred vision                                        | 1       | 0    | 0                | 0       | 0       | 0        | 0                                     | 0       | 0       | 1        | 0                                   | 0       | 0       | 0        |
| Bone pain                                             | 2       | 0    | 0                | 0       | 0       | 0        | 0                                     | 1       | 0       | 0        | 1                                   | 0       | 0       | 0        |
| Bronchial infection                                   | 15      | 0    | 0                | 0       | 0       | 1        | 2                                     | 3       | 4       | 0        | 1                                   | 1       | 0       | 3        |
| Bruising                                              | 2       | 0    | 0                | 0       | 0       | 0        | 2                                     | 0       | 0       | 0        | 0                                   | 0       | 0       | 0        |
| Burn                                                  | 2       | 0    | 0                | 1       | 0       | 0        | 0                                     | 0       | 1       | 0        | 0                                   | 0       | 0       | 0        |
| Cardiac disorders - Other, specify                    | 5       | 0    | 0                | 0       | 0       | 0        | 0                                     | 1       | 0       | 1        | 0                                   | 1       | 0       | 2        |
| Chest pain - cardiac                                  | 7       | 0    | 0                | 0       | 0       | 0        | 2                                     | 1       | 1       | 2        | 0                                   | 1       | 0       | 0        |
| Chest wall pain                                       | 2       | 0    | 0                | 0       | 0       | 0        | 0                                     | 0       | 1       | 1        | 0                                   | 0       | 0       | 0        |

|                                                     |    |   |   |   |   |   |   |   |    |   |   |   |   |   |
|-----------------------------------------------------|----|---|---|---|---|---|---|---|----|---|---|---|---|---|
| <b>Cholesterol high</b>                             | 9  | 0 | 0 | 2 | 1 | 3 | 1 | 0 | 1  | 0 | 0 | 0 | 1 | 0 |
| <b>Chronic kidney disease</b>                       | 1  | 0 | 1 | 0 | 0 | 0 | 0 | 0 | 0  | 0 | 0 | 0 | 0 | 0 |
| <b>Colonic obstruction</b>                          | 1  | 0 | 0 | 0 | 0 | 0 | 0 | 0 | 0  | 1 | 0 | 0 | 0 | 0 |
| <b>Conjunctivitis</b>                               | 1  | 0 | 0 | 0 | 0 | 0 | 0 | 0 | 0  | 1 | 0 | 0 | 0 | 0 |
| <b>Constipation</b>                                 | 4  | 0 | 0 | 1 | 0 | 0 | 1 | 0 | 1  | 1 | 0 | 0 | 0 | 0 |
| <b>Cough</b>                                        | 33 | 0 | 0 | 1 | 2 | 0 | 3 | 5 | 14 | 8 | 0 | 0 | 0 | 0 |
| <b>Creatinine increased</b>                         | 1  | 0 | 1 | 0 | 0 | 0 | 0 | 0 | 0  | 0 | 0 | 0 | 0 | 0 |
| <b>Death NOS</b>                                    | 1  | 1 | 0 | 0 | 0 | 0 | 0 | 0 | 0  | 0 | 0 | 0 | 0 | 0 |
| <b>Dehydration</b>                                  | 2  | 0 | 0 | 0 | 0 | 0 | 1 | 0 | 1  | 0 | 0 | 0 | 0 | 0 |
| <b>Depressed level of consciousness</b>             | 1  | 0 | 0 | 0 | 0 | 0 | 0 | 0 | 0  | 1 | 0 | 0 | 0 | 0 |
| <b>Depressed mood</b>                               | 9  | 0 | 1 | 0 | 0 | 0 | 2 | 2 | 1  | 3 | 0 | 0 | 0 | 0 |
| <b>Depression</b>                                   | 14 | 0 | 0 | 0 | 0 | 0 | 3 | 4 | 4  | 1 | 0 | 1 | 0 | 1 |
| <b>Diarrhea</b>                                     | 3  | 0 | 0 | 0 | 0 | 0 | 0 | 1 | 1  | 0 | 0 | 0 | 0 | 1 |
| <b>Dizziness</b>                                    | 8  | 0 | 1 | 0 | 0 | 0 | 1 | 3 | 2  | 1 | 0 | 0 | 0 | 0 |
| <b>Dry cough</b>                                    | 21 | 0 | 0 | 0 | 0 | 0 | 0 | 4 | 9  | 8 | 0 | 0 | 0 | 0 |
| <b>Dry mouth</b>                                    | 6  | 0 | 0 | 0 | 0 | 0 | 0 | 1 | 2  | 3 | 0 | 0 | 0 | 0 |
| <b>Dry skin</b>                                     | 1  | 0 | 0 | 0 | 0 | 0 | 0 | 0 | 0  | 0 | 1 | 0 | 0 | 0 |
| <b>Dyspnea</b>                                      | 5  | 0 | 0 | 0 | 0 | 0 | 0 | 2 | 1  | 1 | 0 | 1 | 0 | 0 |
| <b>Ear and labyrinth disorders - Other, specify</b> | 1  | 0 | 0 | 0 | 0 | 0 | 0 | 1 | 0  | 0 | 0 | 0 | 0 | 0 |
| <b>Edema limbs</b>                                  | 2  | 0 | 0 | 0 | 0 | 0 | 0 | 0 | 1  | 1 | 0 | 0 | 0 | 0 |
| <b>Epistaxis</b>                                    | 2  | 0 | 0 | 0 | 0 | 0 | 0 | 0 | 1  | 1 | 0 | 0 | 0 | 0 |
| <b>Eye disorders - Other, specify</b>               | 3  | 1 | 0 | 0 | 0 | 0 | 0 | 0 | 1  | 0 | 0 | 1 | 0 | 0 |
| <b>Fall</b>                                         | 5  | 1 | 0 | 0 | 0 | 0 | 1 | 1 | 2  | 0 | 0 | 0 | 0 | 0 |
| <b>Fatigue</b>                                      | 4  | 0 | 1 | 0 | 0 | 0 | 1 | 0 | 2  | 0 | 0 | 0 | 0 | 0 |
| <b>Fever</b>                                        | 4  | 0 | 0 | 0 | 1 | 0 | 0 | 0 | 1  | 2 | 0 | 0 | 0 | 0 |
| <b>Flu like symptoms</b>                            | 33 | 0 | 1 | 0 | 0 | 2 | 6 | 7 | 8  | 7 | 1 | 1 | 0 | 0 |
| <b>Fracture</b>                                     | 9  | 0 | 0 | 0 | 1 | 0 | 0 | 1 | 0  | 2 | 2 | 0 | 0 | 3 |
| <b>Gastric ulcer</b>                                | 1  | 0 | 0 | 0 | 0 | 0 | 0 | 0 | 0  | 0 | 1 | 0 | 0 | 0 |

|                                                                              |    |   |   |   |   |   |   |   |    |    |   |   |   |   |
|------------------------------------------------------------------------------|----|---|---|---|---|---|---|---|----|----|---|---|---|---|
| <b>Gastritis</b>                                                             | 1  | 0 | 0 | 0 | 0 | 0 | 0 | 0 | 0  | 1  | 0 | 0 | 0 | 0 |
| <b>Gastroesophageal reflux disease</b>                                       | 2  | 0 | 0 | 0 | 0 | 0 | 0 | 0 | 0  | 2  | 0 | 0 | 0 | 0 |
| <b>Gastrointestinal disorders - Other, specify</b>                           | 8  | 0 | 0 | 0 | 0 | 0 | 2 | 0 | 2  | 4  | 0 | 0 | 0 | 0 |
| <b>Gastrointestinal pain</b>                                                 | 2  | 0 | 0 | 0 | 0 | 0 | 0 | 0 | 2  | 0  | 0 | 0 | 0 | 0 |
| <b>General disorders and administration site conditions - Other, specify</b> | 1  | 0 | 0 | 0 | 0 | 0 | 0 | 1 | 0  | 0  | 0 | 0 | 0 | 0 |
| <b>Generalized muscle weakness</b>                                           | 1  | 0 | 0 | 0 | 0 | 0 | 0 | 0 | 0  | 1  | 0 | 0 | 0 | 0 |
| <b>Gum infection</b>                                                         | 2  | 0 | 0 | 0 | 0 | 0 | 0 | 1 | 0  | 0  | 0 | 0 | 1 | 0 |
| <b>Hallucinations</b>                                                        | 1  | 0 | 0 | 0 | 0 | 0 | 0 | 1 | 0  | 0  | 0 | 0 | 0 | 0 |
| <b>Headache</b>                                                              | 30 | 0 | 0 | 0 | 0 | 0 | 2 | 8 | 10 | 10 | 0 | 0 | 0 | 0 |
| <b>Heart failure</b>                                                         | 1  | 0 | 0 | 0 | 0 | 0 | 0 | 0 | 0  | 0  | 0 | 0 | 0 | 1 |
| <b>Hepatobiliary disorders</b>                                               | 1  | 0 | 0 | 0 | 0 | 0 | 0 | 0 | 0  | 1  | 0 | 0 | 0 | 0 |
| <b>Hepatobiliary disorders - other</b>                                       | 1  | 0 | 0 | 0 | 0 | 0 | 0 | 0 | 0  | 0  | 0 | 1 | 0 | 0 |
| <b>Hiccups</b>                                                               | 2  | 0 | 0 | 0 | 0 | 0 | 0 | 0 | 0  | 2  | 0 | 0 | 0 | 0 |
| <b>Hyperglycemia</b>                                                         | 2  | 0 | 0 | 0 | 1 | 0 | 0 | 0 | 0  | 0  | 0 | 0 | 1 | 0 |
| <b>Hyperkalemia</b>                                                          | 3  | 0 | 1 | 1 | 1 | 0 | 0 | 0 | 0  | 0  | 0 | 0 | 0 | 0 |
| <b>Hypertension</b>                                                          | 46 | 0 | 2 | 3 | 3 | 3 | 5 | 8 | 8  | 9  | 2 | 1 | 1 | 1 |
| <b>Hypertriglyceridemia</b>                                                  | 12 | 0 | 2 | 3 | 2 | 3 | 0 | 0 | 1  | 1  | 0 | 0 | 0 | 0 |
| <b>Hypocalcemia</b>                                                          | 1  | 0 | 0 | 0 | 0 | 0 | 0 | 0 | 0  | 1  | 0 | 0 | 0 | 0 |
| <b>Hypoglycemia</b>                                                          | 1  | 0 | 0 | 0 | 0 | 0 | 1 | 0 | 0  | 0  | 0 | 0 | 0 | 0 |
| <b>Hyponatremia</b>                                                          | 1  | 0 | 0 | 1 | 0 | 0 | 0 | 0 | 0  | 0  | 0 | 0 | 0 | 0 |
| <b>Increased appetite</b>                                                    | 1  | 0 | 0 | 0 | 0 | 0 | 0 | 0 | 1  | 0  | 0 | 0 | 0 | 0 |
| <b>Infections and infestations - Other, specify</b>                          | 7  | 0 | 0 | 0 | 0 | 0 | 1 | 1 | 1  | 3  | 0 | 1 | 0 | 0 |
| <b>Injury, poisoning and procedural complications</b>                        | 5  | 0 | 0 | 1 | 0 | 0 | 0 | 1 | 1  | 1  | 0 | 0 | 1 | 0 |
| <b>Injury, poisoning and procedural complications - Other, specify</b>       | 20 | 0 | 0 | 0 | 0 | 0 | 5 | 1 | 6  | 4  | 2 | 0 | 2 | 0 |
| <b>Investigations - Other, specify</b>                                       | 10 | 0 | 2 | 1 | 2 | 3 | 0 | 2 | 0  | 0  | 0 | 0 | 0 | 0 |
| <b>Irritability</b>                                                          | 5  | 0 | 0 | 0 | 0 | 0 | 2 | 0 | 2  | 1  | 0 | 0 | 0 | 0 |
| <b>Joint range of motion decreased</b>                                       | 2  | 0 | 0 | 0 | 0 | 0 | 1 | 1 | 0  | 0  | 0 | 0 | 0 | 0 |

|                                                                                      |    |   |   |   |   |   |   |   |   |   |   |   |   |   |
|--------------------------------------------------------------------------------------|----|---|---|---|---|---|---|---|---|---|---|---|---|---|
| Laryngitis                                                                           | 2  | 0 | 0 | 0 | 0 | 0 | 1 | 0 | 0 | 1 | 0 | 0 | 0 | 0 |
| Lethargy                                                                             | 1  | 0 | 0 | 0 | 0 | 0 | 0 | 0 | 1 | 0 | 0 | 0 | 0 | 0 |
| Leukocytosis                                                                         | 1  | 0 | 1 | 0 | 0 | 0 | 0 | 0 | 0 | 0 | 0 | 0 | 0 | 0 |
| Lung infection                                                                       | 2  | 0 | 0 | 1 | 0 | 0 | 0 | 0 | 0 | 0 | 1 | 0 | 0 | 0 |
| Lymph node pain                                                                      | 1  | 0 | 0 | 0 | 0 | 0 | 0 | 0 | 0 | 1 | 0 | 0 | 0 | 0 |
| Metabolism and nutrition disorders - Other, specify                                  | 2  | 0 | 0 | 0 | 0 | 0 | 0 | 0 | 1 | 1 | 0 | 0 | 0 | 0 |
| Mitral valve disease                                                                 | 1  | 0 | 0 | 0 | 0 | 0 | 0 | 0 | 0 | 0 | 0 | 0 | 0 | 1 |
| Mouth ulcers                                                                         | 15 | 0 | 1 | 0 | 0 | 0 | 0 | 3 | 5 | 5 | 1 | 0 | 0 | 0 |
| Mucus in throat/sinus                                                                | 5  | 0 | 0 | 0 | 1 | 0 | 0 | 3 | 1 | 0 | 0 | 0 | 0 | 0 |
| Musculoskeletal and connective tissue disorder - Other, specify                      | 5  | 0 | 0 | 0 | 0 | 0 | 1 | 0 | 3 | 1 | 0 | 0 | 0 | 0 |
| Musculoskeletal deformity                                                            | 1  | 0 | 0 | 0 | 0 | 0 | 0 | 1 | 0 | 0 | 0 | 0 | 0 | 0 |
| Myocardial infarction                                                                | 1  | 0 | 0 | 0 | 0 | 0 | 0 | 0 | 0 | 0 | 0 | 0 | 0 | 1 |
| Nasal congestion                                                                     | 33 | 0 | 1 | 0 | 0 | 2 | 6 | 5 | 7 | 8 | 0 | 0 | 2 | 2 |
| Nausea                                                                               | 19 | 0 | 0 | 0 | 0 | 0 | 2 | 2 | 7 | 6 | 1 | 0 | 1 | 0 |
| Neck pain                                                                            | 1  | 0 | 0 | 0 | 0 | 0 | 0 | 0 | 0 | 1 | 0 | 0 | 0 | 0 |
| Neoplasms benign, malignant and unspecified (incl cysts and polyps) - Other, specify | 6  | 0 | 0 | 0 | 0 | 0 | 1 | 1 | 1 | 1 | 0 | 1 | 0 | 1 |
| Nervous system disorders - Other, specify                                            | 1  | 0 | 0 | 0 | 0 | 0 | 0 | 0 | 0 | 0 | 0 | 0 | 0 | 1 |
| Non-cardiac chest pain                                                               | 1  | 0 | 0 | 0 | 0 | 0 | 1 | 0 | 0 | 0 | 0 | 0 | 0 | 0 |
| Non-MedDRA - Bad taste resulting from dry puff                                       | 1  | 0 | 0 | 0 | 0 | 0 | 0 | 0 | 1 | 0 | 0 | 0 | 0 | 0 |
| Oral pain                                                                            | 7  | 1 | 0 | 0 | 0 | 0 | 1 | 1 | 2 | 0 | 1 | 0 | 0 | 1 |
| Pain                                                                                 | 20 | 0 | 0 | 1 | 0 | 0 | 6 | 2 | 3 | 6 | 0 | 1 | 1 | 0 |
| Pain in extremity                                                                    | 6  | 0 | 0 | 0 | 0 | 0 | 2 | 1 | 2 | 0 | 0 | 0 | 1 | 0 |
| Palpitations                                                                         | 1  | 0 | 0 | 0 | 0 | 0 | 0 | 1 | 0 | 0 | 0 | 0 | 0 | 0 |
| Paresthesia                                                                          | 1  | 0 | 0 | 0 | 0 | 0 | 0 | 0 | 0 | 1 | 0 | 0 | 0 | 0 |
| Pharyngitis                                                                          | 3  | 0 | 0 | 0 | 0 | 0 | 2 | 0 | 1 | 0 | 0 | 0 | 0 | 0 |
| Pneumonitis                                                                          | 3  | 0 | 0 | 0 | 0 | 0 | 1 | 0 | 0 | 2 | 0 | 0 | 0 | 0 |
| Productive cough                                                                     | 1  | 0 | 0 | 0 | 0 | 0 | 0 | 0 | 1 | 0 | 0 | 0 | 0 | 0 |

|                                                                         |     |   |    |    |    |    |    |    |    |    |   |   |   |   |
|-------------------------------------------------------------------------|-----|---|----|----|----|----|----|----|----|----|---|---|---|---|
| <b>Prostate infection</b>                                               | 1   | 0 | 0  | 0  | 0  | 0  | 0  | 0  | 0  | 0  | 0 | 0 | 0 | 1 |
| <b>Pruritus</b>                                                         | 1   | 0 | 0  | 0  | 0  | 1  | 0  | 0  | 0  | 0  | 0 | 0 | 0 | 0 |
| <b>Psychiatric disorders - Other, specify</b>                           | 8   | 0 | 0  | 0  | 0  | 0  | 2  | 0  | 3  | 2  | 0 | 0 | 1 | 0 |
| <b>Rash</b>                                                             | 2   | 0 | 0  | 0  | 0  | 0  | 0  | 0  | 2  | 0  | 0 | 0 | 0 | 0 |
| <b>Rectal obstruction</b>                                               | 1   | 0 | 0  | 0  | 0  | 0  | 0  | 1  | 0  | 0  | 0 | 0 | 0 | 0 |
| <b>Reproductive system and breast disorders - Other, specify</b>        | 5   | 0 | 0  | 0  | 0  | 0  | 1  | 0  | 1  | 2  | 0 | 1 | 0 | 0 |
| <b>Respiratory, thoracic and mediastinal disorders - Other, specify</b> | 332 | 0 | 61 | 61 | 59 | 61 | 21 | 15 | 14 | 25 | 3 | 7 | 4 | 1 |
| <b>Rhinitis</b>                                                         | 1   | 0 | 0  | 0  | 0  | 0  | 0  | 0  | 0  | 1  | 0 | 0 | 0 | 0 |
| <b>Seizure</b>                                                          | 1   | 0 | 0  | 0  | 1  | 0  | 0  | 0  | 0  | 0  | 0 | 0 | 0 | 0 |
| <b>Shortness of breath</b>                                              | 3   | 0 | 0  | 0  | 0  | 0  | 1  | 1  | 1  | 0  | 0 | 0 | 0 | 0 |
| <b>Sinus disorder</b>                                                   | 1   | 0 | 0  | 0  | 0  | 0  | 0  | 1  | 0  | 0  | 0 | 0 | 0 | 0 |
| <b>Sinus pain</b>                                                       | 2   | 0 | 0  | 0  | 0  | 0  | 0  | 1  | 1  | 0  | 0 | 0 | 0 | 0 |
| <b>Sinus tachycardia</b>                                                | 2   | 0 | 0  | 0  | 0  | 0  | 0  | 1  | 1  | 0  | 0 | 0 | 0 | 0 |
| <b>Sinusitis</b>                                                        | 16  | 0 | 1  | 0  | 0  | 0  | 3  | 3  | 5  | 1  | 0 | 1 | 1 | 1 |
| <b>Skin and subcutaneous tissue disorders - Other, specify</b>          | 7   | 0 | 1  | 0  | 0  | 0  | 1  | 2  | 2  | 1  | 0 | 0 | 0 | 0 |
| <b>Skin infection</b>                                                   | 2   | 0 | 0  | 0  | 0  | 0  | 0  | 0  | 0  | 1  | 0 | 1 | 0 | 0 |
| <b>Sore throat</b>                                                      | 27  | 0 | 1  | 0  | 0  | 0  | 0  | 7  | 6  | 11 | 1 | 0 | 1 | 0 |
| <b>Stomach pain</b>                                                     | 2   | 0 | 0  | 0  | 0  | 0  | 1  | 1  | 0  | 0  | 0 | 0 | 0 | 0 |
| <b>Stroke</b>                                                           | 1   | 0 | 0  | 0  | 0  | 0  | 0  | 0  | 1  | 0  | 0 | 0 | 0 | 0 |
| <b>Suicidal ideation</b>                                                | 2   | 0 | 0  | 0  | 0  | 0  | 0  | 1  | 0  | 0  | 0 | 1 | 0 | 0 |
| <b>Suicide attempt</b>                                                  | 1   | 0 | 0  | 0  | 0  | 0  | 0  | 1  | 0  | 0  | 0 | 0 | 0 | 0 |
| <b>Surgical and medical procedures - Other, specify</b>                 | 45  | 0 | 0  | 0  | 0  | 0  | 7  | 10 | 7  | 13 | 2 | 1 | 4 | 1 |
| <b>Syncope</b>                                                          | 2   | 0 | 0  | 0  | 0  | 1  | 0  | 1  | 0  | 0  | 0 | 0 | 0 | 0 |
| <b>Throat irritation</b>                                                | 4   | 0 | 0  | 0  | 0  | 0  | 0  | 1  | 1  | 2  | 0 | 0 | 0 | 0 |
| <b>Tooth infection</b>                                                  | 5   | 0 | 0  | 0  | 0  | 0  | 1  | 4  | 0  | 0  | 0 | 0 | 0 | 0 |
| <b>Toothache</b>                                                        | 11  | 0 | 0  | 0  | 1  | 0  | 2  | 3  | 2  | 1  | 1 | 1 | 0 | 0 |
| <b>Tremor</b>                                                           | 1   | 0 | 0  | 0  | 0  | 0  | 0  | 0  | 0  | 0  | 0 | 0 | 0 | 1 |

|                                    |    |   |   |   |   |   |   |    |    |    |   |   |   |   |
|------------------------------------|----|---|---|---|---|---|---|----|----|----|---|---|---|---|
| <b>Upper respiratory infection</b> | 46 | 1 | 1 | 3 | 1 | 0 | 4 | 10 | 12 | 11 | 1 | 0 | 1 | 1 |
| <b>Urinary tract infection</b>     | 3  | 0 | 0 | 0 | 0 | 0 | 1 | 0  | 1  | 1  | 0 | 0 | 0 | 0 |
| <b>Vomiting</b>                    | 4  | 0 | 0 | 0 | 0 | 0 | 1 | 1  | 0  | 1  | 0 | 0 | 0 | 1 |
| <b>Watering eyes</b>               | 2  | 0 | 0 | 0 | 0 | 0 | 0 | 1  | 0  | 1  | 0 | 0 | 0 | 0 |
| <b>Wheezing</b>                    | 1  | 0 | 0 | 0 | 0 | 0 | 0 | 0  | 0  | 0  | 0 | 0 | 1 | 0 |
| <b>Wound infection</b>             | 1  | 0 | 0 | 0 | 0 | 0 | 0 | 0  | 0  | 1  | 0 | 0 | 0 | 0 |

Note: CS, cigarette substitute.

\*Pre-randomisation

**Table S77. Count of serious and severe adverse events**

|                                                                                 | Overall | Baseline (W0) |         |         | Intervention Period (W1-W24) |    |         |         | Follow-up Period (W25-W36) |    |         |         |          |
|---------------------------------------------------------------------------------|---------|---------------|---------|---------|------------------------------|----|---------|---------|----------------------------|----|---------|---------|----------|
|                                                                                 |         | CS            | 0 mg/ml | 8 mg/ml | 36 mg/ml                     | CS | 0 mg/ml | 8 mg/ml | 36 mg/ml                   | CS | 0 mg/ml | 8 mg/ml | 36 mg/ml |
| <b>Number of serious AEs</b>                                                    | 44*     | 0             | 1       | 1       | 0                            | 11 | 7       | 5       | 8                          | 2  | 3       | 1       | 4        |
| <b>Number of serious AEs (possible/probably/definitely related)<sup>†</sup></b> | 0       | 0             | 0       | 0       | 0                            | 0  | 0       | 0       | 0                          | 0  | 0       | 0       | 0        |
| <b>Number of severe AEs</b>                                                     | 114*    | 2             | 8       | 7       | 6                            | 19 | 21      | 14      | 17                         | 5  | 5       | 1       | 8        |
| <b>Number of severe AEs (possible/probable/definitely related)</b>              | 4       | 0             | 0       | 0       | 0                            | 0  | 1       | 2       | 1                          | 0  | 0       | 0       | 0        |

Note: AE, adverse event; W, week. Multiple symptoms related to the same event in the same participant are only counted once. Study period (baseline, intervention, follow-up) when AE noted may represent when symptoms (i.e., initial AE) first emerged not when the serious and/or severe event was documented. Serious AEs may have been designated as either mild/moderate/severe/life-threatening/fatal in terms of severity. Severe AEs include those coded as severe/life-threatening/fatal.

† All serious AEs are unrelated or unlikely (remote)

\* One serious and severe AE happened at week 0 before randomisation hence is not categorized in any of the conditions



**Table S78. Description of serious and severe events**

| <b>Seriousness</b> | <b>Severity</b>  | <b>Relatedness</b> | <b>Withdrawn</b>           | <b>Condition</b> | <b>Description</b>                             |
|--------------------|------------------|--------------------|----------------------------|------------------|------------------------------------------------|
| Yes                | Fatal            | Unrelated          | Yes-prior to randomisation | -                | Death - not otherwise specified                |
| Yes                | Fatal            | Unlikely           | Yes                        | 0                | Suicide attempt                                |
| Yes                | Life-threatening | Unlikely           | Yes                        | substitute       | Depression                                     |
| Yes                | Life-threatening | Unlikely           | Yes                        | 0                | Suicidal ideation                              |
| Yes                | Life-threatening | Unrelated          | Yes                        | 0                | Depression                                     |
| Yes                | Life-threatening | Unrelated          | Yes                        | substitute       | Breast cancer diagnosis                        |
| Yes                | Life-threatening | Unlikely           | Yes                        | 0                | Depression                                     |
| Yes                | Life-threatening | Unlikely           | No                         | 36               | Lung cancer diagnosis and treatment            |
| Yes                | Life-threatening | Unlikely           | No                         | substitute       | Lung cancer diagnosis and treatment            |
| Yes                | Life-threatening | Unrelated          | No                         | 36               | Appendicitis perforated                        |
| Yes                | Mild             | Unrelated          | Yes                        | 8                | Hyperlipidemia                                 |
| Yes                | Moderate         | Unrelated          | Yes&                       | 36               | Chest pain - nonspecific                       |
| Yes                | Moderate         | Unrelated          | No                         | substitute       | Pain due to car accident                       |
| Yes                | Moderate         | Unrelated          | No                         | 0                | Worsening pulmonary function (FEV1 value <70%) |
| Yes                | Moderate         | Unrelated          | No                         | 36               | Back pain due to car accident                  |
| Yes                | Moderate         | Unlikely           | No                         | substitute       | Non-cardiac chest pain                         |
| Yes                | Severe           | Unrelated          | Yes*                       | 8                | Appendicitis                                   |
| Yes                | Severe           | Unrelated          | Yes*                       | 8                | Appendicitis perforated                        |
| Yes                | Severe           | Unrelated          | Yes*                       | 0                | Hyperkalemia                                   |
| Yes                | Severe           | Unlikely           | Yes*                       | 36               | Tracheal narrowing                             |
| Yes                | Severe           | Unrelated          | Yes*                       | 36               | Fracture                                       |
| Yes                | Severe           | Unlikely           | Yes*                       | 36               | Adrenal insufficiency                          |
| Yes                | Severe           | Unlikely           | Yes*                       | substitute       | Fracture                                       |
| Yes                | Severe           | Unlikely           | Yes&                       | substitute       | Pneumonia                                      |
| Yes                | Severe           | Unrelated          | Yes&                       | substitute       | Urinary tract infection                        |
| Yes                | Severe           | Unrelated          | Yes                        | 8                | Stroke                                         |
| Yes                | Severe           | Unrelated          | Yes                        | 36               | Liver cancer diagnosis                         |
| Yes                | Severe           | Unrelated          | No                         | 0                | Infection                                      |
| Yes                | Severe           | Unlikely           | No                         | 0                | COPD exacerbation                              |
| Yes                | Severe           | Unrelated          | No                         | 8                | Stomach pain/bleeding                          |
| Yes                | Severe           | Unlikely           | No                         | 36               | Pneumonia                                      |
| Yes                | Severe           | Unrelated          | No                         | substitute       | Rheumatoid Arthritis                           |
| Yes                | Severe           | Unlikely           | No                         | 8                | Upper respiratory infection; asthma attack     |
| Yes                | Severe           | Unlikely           | No                         | 0                | Kidney stone and treatment                     |

|     |                  |           |      |            |                                                                   |
|-----|------------------|-----------|------|------------|-------------------------------------------------------------------|
| Yes | Severe           | Unlikely  | No   | 36         | Bowel obstruction; hernia; hernia treatment; gall bladder removal |
| Yes | Severe           | Unlikely  | No   | substitute | Diverticulitis; hernia; hernia surgery                            |
| Yes | Severe           | Unrelated | No   | 0          | Breast cancer diagnosis and treatment                             |
| Yes | Severe           | Unlikely  | No   | substitute | Pneumonia                                                         |
| Yes | Severe           | Unlikely  | No   | 36         | Myocardial infarction; stent replacement                          |
| Yes | Severe           | Unlikely  | No   | 8          | Ovarian torsion; surgery                                          |
| Yes | Severe           | Unlikely  | No   | 36         | Heart failure                                                     |
| Yes | Severe           | Unrelated | No   | substitute | Hiatal hernia                                                     |
| Yes | Severe           | Unrelated | No   | substitute | Dehydration; kidney disorder                                      |
| Yes | Severe           | Unlikely  | No   | 0          | Gastritis                                                         |
| No  | Life-threatening | Unrelated | Yes  | 8          | Hyperglycemia                                                     |
| No  | Life-threatening | Unrelated | Yes  | 8          | Hyperkalemia                                                      |
| No  | Life-threatening | Unrelated | No   | substitute | Hypertriglyceridemia                                              |
| No  | Life-threatening | Unrelated | No   | 36         | Hypertriglyceridemia                                              |
| No  | Life-threatening | Unrelated | No   | 36         | Hypertriglyceridemia                                              |
| No  | Life-threatening | Unrelated | No   | 0          | Hypertriglyceridemia                                              |
| No  | Life-threatening | Unlikely  | No   | 36         | Hypocalcemia                                                      |
| No  | Severe           | Unrelated | Yes* | 8          | Hypertension                                                      |
| No  | Severe           | Unrelated | Yes* | 8          | Hypertension                                                      |
| No  | Severe           | Unlikely  | Yes* | 36         | Hypertension                                                      |
| No  | Severe           | Unrelated | Yes* | 0          | Hypertension                                                      |
| No  | Severe           | Unrelated | Yes* | 0          | Hypertension                                                      |
| No  | Severe           | Unrelated | Yes* | substitute | Elective orthopedic surgery                                       |
| No  | Severe           | Unrelated | Yes* | 0          | Hypertriglyceridemia                                              |
| No  | Severe           | Probable  | Yes* | 36         | Cough                                                             |
| No  | Severe           | Unlikely  | Yes* | 36         | Hypertension                                                      |
| No  | Severe           | Unrelated | Yes* | 36         | Hypertriglyceridemia                                              |
| No  | Severe           | Unrelated | Yes* | 8          | Hypertriglyceridemia                                              |
| No  | Severe           | Unrelated | Yes* | substitute | Hypertriglyceridemia                                              |
| No  | Severe           | Unrelated | Yes* | 36         | Hypertriglyceridemia                                              |
| No  | Severe           | Unrelated | Yes& | 0          | Hypertriglyceridemia                                              |
| No  | Severe           | Unrelated | Yes  | 36         | Hypertension                                                      |
| No  | Severe           | Unlikely  | Yes  | 0          | Hypertension                                                      |
| No  | Severe           | Unlikely  | Yes  | 8          | Hypertension                                                      |
| No  | Severe           | Unrelated | No   | 0          | Tooth infection; treatment                                        |
| No  | Severe           | Unrelated | No   | 8          | Hypertension                                                      |

|    |        |           |    |            |                            |
|----|--------|-----------|----|------------|----------------------------|
| No | Severe | Unrelated | No | 8          | Hypertension               |
| No | Severe | Unrelated | No | substitute | Hypertension               |
| No | Severe | Unrelated | No | 0          | Hypertension               |
| No | Severe | Unlikely  | No | 0          | Hypertension               |
| No | Severe | Unrelated | No | substitute | Hypertension               |
| No | Severe | Unrelated | No | 0          | Hypertension               |
| No | Severe | Unrelated | No | 0          | Sinusitis                  |
| No | Severe | Unrelated | No | 36         | Hypertension               |
| No | Severe | Unlikely  | No | 8          | Hypertension               |
| No | Severe | Unlikely  | No | 0          | Hypertension               |
| No | Severe | Unrelated | No | 8          | Hypertension               |
| No | Severe | Unrelated | No | 0          | Hypertension               |
| No | Severe | Unrelated | No | 0          | Hypertension               |
| No | Severe | Unlikely  | No | 36         | Hypertension               |
| No | Severe | Unlikely  | No | substitute | Hypertension               |
| No | Severe | Definite  | No | 8          | Dyspnea                    |
| No | Severe | Unrelated | No | 36         | Syncope                    |
| No | Severe | Unrelated | No | substitute | Hypertension               |
| No | Severe | Unrelated | No | substitute | Hypertension               |
| No | Severe | Unrelated | No | 0          | Hypertension               |
| No | Severe | Unlikely  | No | 0          | Hypertension               |
| No | Severe | Unrelated | No | 0          | Hypertension               |
| No | Severe | Unrelated | No | 8          | Hypertension               |
| No | Severe | Unrelated | No | 36         | Hypertension               |
| No | Severe | Unlikely  | No | 8          | Hypertension               |
| No | Severe | Unrelated | No | 0          | Hypoglycemia               |
| No | Severe | Unrelated | No | substitute | Hypertension               |
| No | Severe | Unrelated | No | substitute | Hypoglycemia               |
| No | Severe | Unlikely  | No | substitute | Angioedema                 |
| No | Severe | Unlikely  | No | 0          | Depression                 |
| No | Severe | Unlikely  | No | 0          | Depression                 |
| No | Severe | Unlikely  | No | 0          | Tooth infection; treatment |
| No | Severe | Unrelated | No | 36         | Fracture                   |
| No | Severe | Unlikely  | No | 0          | Syncope                    |
| No | Severe | Unrelated | No | 8          | Hypertriglyceridemia       |
| No | Severe | Unlikely  | No | 0          | Back pain; treatment       |
| No | Severe | Unlikely  | No | 8          | Hypertriglyceridemia       |
| No | Severe | Unlikely  | No | 36         | Tremor                     |

|    |        |           |    |            |                         |
|----|--------|-----------|----|------------|-------------------------|
| No | Severe | Possible  | No | 8          | Cough; Syncope          |
| No | Severe | Unlikely  | No | 36         | Hypertension            |
| No | Severe | Unlikely  | No | 36         | Dyspnea                 |
| No | Severe | Unlikely  | No | 36         | Hypertension            |
| No | Severe | Unrelated | No | substitute | Hypertension            |
| No | Severe | Unlikely  | No | 36         | Mitral valve disease    |
| No | Severe | Unrelated | No | substitute | Pneumonia               |
| No | Severe | Unlikely  | No | substitute | Back pain               |
| No | Severe | Unlikely  | No | substitute | Urology-related surgery |
| No | Severe | Possible  | No | 0          | Hypertension            |
| No | Severe | Unlikely  | No | 36         | Pneumonia               |
| No | Severe | Unlikely  | No | 36         | Back pain               |

Note: Abbreviations: AE, adverse event; W, week. Multiple symptoms related to the same event in the same participant are only counted once. There are 120 events with 94 participants. Among the 94 participants, 1 participant had 4 events, 2 participants had 3 events, 19 participants had 2 events, and 72 participants had 1 event.

\*PI decision to withdraw from study for unrelated reason (i.e., missed three consecutive visits).

&Participant self-withdrew from study.

## Complete Statistical Analysis Plan Documentation

Statistical Analysis Plan -  
Randomized Controlled Trial Methods for Novel Tobacco Products Evaluation

Version: 4

Authors:

Caroline Cobb

Miao-Shan Yen

Le Kang

Shumei Sun

Thomas Eissenberg

Jonathan Foulds

Date: 11/8/2019

**Table of Contents**

Section 1: Administrative Information..... 174  
Section 2: Introduction ..... 175  
Section 3: Study Methods ..... 175  
    Table 3-1. Adverse Event Definitions..... 176  
    Table 3-2. Definitions of Adverse Event Class..... 177  
    Table 3-3. Timing of Assessments and Study Windows ..... 177  
Section 4: Statistical Principles ..... 180  
Section 5: Trial Population ..... 182  
Section 6: Analysis..... 182  
Appendix ..... 186

## Section 1: Administrative Information

### 1.1. Title

Randomized Controlled Trial Methods for Novel Tobacco Products Evaluation

### 1.2. Trial Registration

ClinicalTrials.gov Identifier: NCT02342795

### 1.3. SAP version

SAP Version 3

### 1.4. Protocol version

Amendment 19 – Version Date: 1/1/2018

### 1.5. SAP Revisions

#### 1.5.1. SAP revision history

- Version 1 – approved 12/1/2014
- Version 2 – approved 8/3/2018
- Version 3 – approved 12/14/2018
- Version 4 – approved 11/08/2019

#### 1.5.2. SAP revision justification

- Version 1 – Original statistical analysis plan and power justification published in the Lopez et al., 2016 and included in the primary site protocol originally approved by the VCU IRB.
- Version 2 – Expanded and amended statistical analysis plan to be more comprehensive in the description of the primary, secondary, and exploratory outcomes and their associated analyses, also included relevant information based on other statistical analysis plan source documents (Gamble et al., 2017; CENIC 2: Project 2 SAP, Version-4/12/2018 provided by E. Donny; Statistical analysis plan sample template for clinical trial disclosure projects, no date available available at: [https://www.pfizer.com/files/research/research\\_clinical\\_trials/Clinical\\_Data\\_Access\\_Request\\_Sample\\_SAP.pdf](https://www.pfizer.com/files/research/research_clinical_trials/Clinical_Data_Access_Request_Sample_SAP.pdf)).
- Version 3 – Added detail regarding the definition of cigarette smoking abstinence under exploratory outcomes to be more specific/empirically-based; clarified the approach to missing data for exploratory outcomes considering the resources for multiple imputation models may not be feasible for all study team members/manuscript teams.
- Version 4 – Edited the primary analysis description (“two-way ANOVA with repeated measures”) to be consistent with secondary analyses described (linear mixed models) as well as sensitivity models/analyses (several of which are not best suited to a standard ANOVA model), comparison of findings across primary/secondary/sensitivity models is critical to their interpretation; removed specification that urinary NNAL and cotinine would be examined with and without adjustment for creatinine concentration (retained adjustment with creatinine concentration as this is the most common among the relevant literature).

#### 1.5.3. Timing of SAP revision in relation to interim analyses

- Not applicable; no interim analyses

### 1.6. Roles and Responsibility

- Caroline Cobb, PhD<sup>a</sup>, drafted and reviewed the SAP
- Miao-Shan Yen, MS<sup>b</sup>, drafted and reviewed the SAP
- Le Kang, PhD<sup>b</sup>, drafted and reviewed the SAP
- Shumei Sun, PhD<sup>b</sup>, advised and reviewed the SAP
- Thomas Eissenberg, PhD<sup>a</sup>, advised and reviewed the SAP
- Jonathan Foulds, PhD<sup>c</sup>, advised and reviewed the SAP

a. Virginia Commonwealth University, Center for the Study of Tobacco Products, Richmond, VA

b. Virginia Commonwealth University, Department of Biostatistics, Richmond, VA

c. Penn State University Department of Public Health Sciences, Tobacco Center of Regulatory Science, College of Medicine, Hershey, PA

### 1.7. Approvals and Date

Caroline Cobb – 11/08/2019 (via email)

Miao-Shan Yen - 11/07/2019 (via email)

Le Kang - 11/07/2019 (via email)

Shumei Sun - 11/07/2019 (via email)

Thomas Eissenberg - 11/07/2019 (via email)

Jonathan Foulds - 11/07/2019 (via email)

## **Section 2: Introduction**

### **2.1. Background and rationale**

The tobacco marketplace in the U.S. is changing fast, while regulatory science lags behind. The FDA can alter this dynamic, but needs the tools to do so. One necessary tool is a model for evaluation of all types of “modified risk tobacco products” (MRTPs): novel products marketed with the claim that they reduce harm or risk associated with the use of conventional products. Such claims need to be evaluated and the products regulated accordingly. However, few models have been proposed for this purpose. This project will show how Randomized Controlled Trial (RCT) methods can inform pre-market evaluation by examining the influence of real world product use on biomarkers of toxicant exposure and disease risk, reports of adverse events, and concurrent use of other tobacco products. Electronic cigarettes (ECIGs) are the focus product for this study. Overall, this project will demonstrate how regulatory science is advanced by an integrated, iterative model of MRTP evaluation that includes RCT methods.

### **2.2. Objectives**

The specific aims of the RCT are to:

- 1) *Characterize product influence on toxicants, biomarkers, health indicators, and disease risk.* We will measure exposure to the carcinogenic nitrosamine 4-(methylnitrosamino)-1-(3-pyridyl)-1-butanone [NNK; via its metabolite NNAL (4-(methylnitrosamino)-1-(3-pyridyl)-1-butanol) in urine], expired air carbon monoxide (CO), and nicotine (via its metabolite cotinine in urine). We will also measure heart rate and blood pressure, biochemical and hematologic health indices, pulmonary function (via spirometry), and biomarkers of oxidative stress. With respect to toxicant exposure, we hypothesize that, relative to the cigarette substitute condition, we will observe ECIG liquid nicotine concentration-related decreases in urine NNAL and expired air CO concentration.
- 2) *Determine the tobacco abstinence symptom and adverse event profile associated with real-world product use.* We will use standard measures of nicotine/tobacco abstinence symptoms (i.e., MNWS, Questionnaire of Smoking Urges) to characterize the extent to which ECIG-induced suppression of abstinence symptoms is related to nicotine concentration. With respect to other adverse events, we will assess effects likely attributable to inhalation of propylene glycol and nicotine self-administration. We hypothesize more of these propylene glycol-related adverse events with ECIGs relative to the cigarette substitute condition.
- 3) *Examine the influence of novel product use on conventional tobacco product use.* We will monitor ECIG and all other tobacco/nicotine product use closely, via daily tobacco use diaries and in-person assessments. Because we are targeting individuals interested in reducing their cigarette intake, we hypothesize ECIG nicotine concentration-related reductions in combustible cigarette use.

## **Section 3: Study Methods**

### **3.1. Trial Design**

The study is a two-site, four-arm, 6-month, parallel-group randomized controlled trial with a follow-up to 9 months.

### **3.2. Randomization**

Blocked randomization was accomplished with a 1:1:1:1 ratio of condition assignments at each participating institution with the original goal of 260 randomized at each site totaling 520. Based on slower recruitment at the VCU site, this randomization allocation by site was changed (10/5/2015) with VCU randomizing 200 and PSU randomizing 320 (totaling 520). The assignment codes were made from separate randomization lists created in advance by the statistician for each site stratum.

### **3.3. Sample Size**

RCT power was based on the important biomarker of toxicant exposure, NNAL concentration in urine. Unfortunately, there were no data that revealed the NNK exposure in ECIG users, as that study has not yet been performed. However, we do have data showing how NNAL concentration in novel tobacco product users compared to own brand cigarette use (Breland, Kleykamp, & Eissenberg, 2006). Using these data, power analysis revealed 100 completers per condition would provide an 80% power to detect an effect size of 58.59 pg/mL (SD = 125.55 pg/mL) on NNAL. We aimed to enroll 130 participants per condition (across sites) anticipating a 20% attrition rate.

### **3.4. Framework**

3.4.1. Randomized assignment to one of four conditions (cigarette substitute; ECIG with 0 mg/ml nicotine liquid; ECIG with 8 mg/ml nicotine liquid; ECIG with 36 mg/ml nicotine liquid; ECIG nicotine dose administered double-blind).

3.4.2. Primary outcome hypothesis is that relative to the cigarette substitute there will be nicotine dose related decreases in total NNAL.



### 3.5. Statistical interim analyses and stopping guidance

3.5.1. No interim analyses regarding the primary or secondary outcomes were planned or carried out.

3.5.2. There are no planned adjustments based on interim analyses.

3.5.3. Stopping Rules

3.5.3.1. The Data and Safety Monitor Board (DSMB) is comprised of four scientists not otherwise affiliated with the clinical trial (please see DSMP/DSMB documentation for more information). The DSMB reserves the right to discontinue or suspend the study at any time, at an individual site or overall, for safety or for administrative reasons. In the event of such action, the DSMB will promptly inform the impacted Investigators and institutions, the regulatory authorities, and the Institutional Review Board (IRB) of the action and the reason(s) for the action.

3.5.3.2. Medical Monitors

The roles of the Medical Monitors are to:

- Review and provide definitive adjudication on individual adverse events (AE).
- Make specific recommendations for study product dispensing.

3.5.3.3. Recording and Definition of Adverse Events (per VCU Protocol\_A19\_1.1.)

Adverse events are recorded and reviewed for updates/changes at every study visit following Visit 1 as well as documented if a participant makes a report via phone or email.

All adverse events (serious or non-serious) and abnormal test findings observed or reported to study team believed to be associated with the study device will be followed until the event (or its sequelae) or the abnormal test finding resolves or stabilizes at a level acceptable to the investigator.

An abnormal test finding will be classified as an *adverse event* if one or more of the following criteria are met:

- The test finding is accompanied by clinical symptoms
- The test finding necessitates additional diagnostic evaluation(s) or medical/surgical intervention; including significant additional concomitant drug treatment or other therapy. **Note:** Simply repeating a test finding, in the absence of any of the other listed criteria, does not constitute an adverse event.
- The test finding leads to a change in study drug dosing or discontinuation of subject participation in the clinical research study.
- The test finding is considered an adverse event by the investigator.

Table 3-1. Adverse Event Definitions

|                                                                                      |                                                                                                                                                                                                                                                                                                                                                                                                                                                                                                                                                                                                                                                                                                                                                                                                                                |
|--------------------------------------------------------------------------------------|--------------------------------------------------------------------------------------------------------------------------------------------------------------------------------------------------------------------------------------------------------------------------------------------------------------------------------------------------------------------------------------------------------------------------------------------------------------------------------------------------------------------------------------------------------------------------------------------------------------------------------------------------------------------------------------------------------------------------------------------------------------------------------------------------------------------------------|
| <b>Adverse event</b>                                                                 | Any untoward medical occurrence associated with the use of the drug in humans, whether or not considered drug related                                                                                                                                                                                                                                                                                                                                                                                                                                                                                                                                                                                                                                                                                                          |
| <b>Adverse reaction</b>                                                              | Any adverse event caused by a drug                                                                                                                                                                                                                                                                                                                                                                                                                                                                                                                                                                                                                                                                                                                                                                                             |
| <b>Suspected adverse reaction</b>                                                    | Any adverse event for which there is a reasonable possibility that the drug caused the adverse event. Suspected adverse reaction implies a lesser degree of certainty about causality than “adverse reaction”. <ul style="list-style-type: none"> <li>• <i>Reasonable possibility.</i> For the purpose of IND safety reporting, “reasonable possibility” means there is evidence to suggest a causal relationship between the drug and the adverse event.</li> </ul>                                                                                                                                                                                                                                                                                                                                                           |
| <b>Serious adverse event or Serious suspected adverse reaction</b>                   | Serious adverse event or Serious suspected adverse reaction: An adverse event or suspected adverse reaction that in the view of either the investigator or sponsor, it results in any of the following outcomes: Death, a life-threatening adverse event, inpatient hospitalization or prolongation of existing hospitalization, a persistent or significant incapacity or substantial disruption of the ability to conduct normal life functions, or a congenital anomaly/birth defect. Important medical events that may not result in death, be life-threatening, or require hospitalization may be considered serious when, based upon appropriate medical judgment, they may jeopardize the patient or subject and may require medical or surgical intervention to prevent one of the outcomes listed in this definition. |
| <b>Life-threatening adverse event or life-threatening suspected adverse reaction</b> | An adverse event or suspected adverse reaction is considered “life-threatening” if, in the view of either the Investigator (i.e., the study site principal investigator) or Sponsor, its occurrence places the patient or research subject at immediate risk of death. It does not include an adverse event or suspected adverse reaction that had it occurred in a more severe form, might have caused death.                                                                                                                                                                                                                                                                                                                                                                                                                 |
| <b>Unexpected adverse event or Unexpected</b>                                        | An adverse event or suspected adverse reaction is considered “unexpected” if it is not listed in the investigator brochure, general investigational plan, clinical protocol, or elsewhere in the current IND                                                                                                                                                                                                                                                                                                                                                                                                                                                                                                                                                                                                                   |

|                                            |                                                                                                                                                                                                                                                                                                                                                                                                                                                                              |
|--------------------------------------------|------------------------------------------------------------------------------------------------------------------------------------------------------------------------------------------------------------------------------------------------------------------------------------------------------------------------------------------------------------------------------------------------------------------------------------------------------------------------------|
| <b>suspected adverse reaction.</b>         | application; or is not listed at the specificity or severity that has been previously observed and/or specified.                                                                                                                                                                                                                                                                                                                                                             |
| <b>Unanticipated adverse device effect</b> | Any serious adverse effect on health or safety or any life-threatening problem or death caused by, or associated with, a device, if that effect, problem, or death was not previously identified in nature, severity, or degree of incidence in the investigational plan or IDE application (including a supplementary plan or application), or any other unanticipated serious problem associated with a device that relates to the rights, safety, or welfare of subjects. |

### 3.5.3.4 Safety monitoring

The **Principal Investigator** will confirm that all adverse events (AE) are correctly entered into the AE case report forms by the coordinator; be available to answer any questions that the coordinators may have concerning AEs; and will notify the IRB, FDA, sponsor and/or DSMB of all applicable AEs as appropriate. All assessments of AEs will be made by a licensed medical professional who is an investigator on the research.

The **research coordinator** will complete the appropriate report form and logs; assist the PI to prepare reports and notify the IRB, FDA, and/or DSMB of all Unanticipated Problems/SAE's.

Table 3-2. Definitions of Adverse Event Class

| Class | Severity               | Expectedness/Relatedness                      | Location | Reporting Timeline              |
|-------|------------------------|-----------------------------------------------|----------|---------------------------------|
| 1     | Serious                | - Unexpected<br>- Related or possibly related | All      | 2 business days from occurrence |
| 2     | Non-serious            | - Unexpected<br>- Related or possibly related | All      | Annual                          |
| 3     | Serious or non-serious | - Expected                                    | All      | Annual                          |

### 3.6. Timing of outcome assessments

Time points at which each of the primary, secondary, and other/exploratory outcomes are measured including visit "windows" are listed below.

Table 3-3. Timing of Assessments and Study Windows

|                                  | Before Consent | Consent | Reduction Phase |           |           |            | Continuation Phase |            |            |            |            | Follow-Up Phase |            |
|----------------------------------|----------------|---------|-----------------|-----------|-----------|------------|--------------------|------------|------------|------------|------------|-----------------|------------|
|                                  |                |         | Baseline        |           |           |            |                    |            |            |            |            |                 |            |
| <b>Study Visit</b>               | NA             | 1       | 2               | 3         | 4         | 5          | 6                  | 7          | 8          | 9          | 10         | 11              | 12         |
| <b>Study Week</b>                | NA             | -1      | 0               | 1         | 2         | 4          | 8                  | 12         | 16         | 20         | 24         | 28              | 36         |
| <b>Days</b>                      | NA             | -7      | 0               | 7         | 14        | 28         | 56                 | 84         | 112        | 140        | 168        | 197             | 253        |
| <b>Study Visit Window</b>        | NA             | -7      | -1/<br>+3       | -3/<br>+3 | -3/<br>+7 | -7/<br>+14 | -7/<br>+14         | -7/<br>+14 | -7/<br>+14 | -7/<br>+14 | -7/<br>+42 | -7/<br>+14      | -7/<br>+14 |
| <b>Participant Instructions:</b> |                |         |                 |           |           |            |                    |            |            |            |            |                 |            |
| Smoke normally for one week      |                | x       |                 |           |           |            |                    |            |            |            |            |                 |            |
| Randomize participants           |                |         | x               |           |           |            |                    |            |            |            |            |                 |            |

|                                          |  |   |   |   |   |   |   |   |   |   |   |   |   |
|------------------------------------------|--|---|---|---|---|---|---|---|---|---|---|---|---|
| Reduce cigarette consumption by 50%      |  |   | x | x |   |   |   |   |   |   |   |   |   |
| Reduce cigarette consumption by 75%      |  |   |   |   | x | x |   |   |   |   |   |   |   |
| Continue to reduce cigarette consumption |  |   |   |   |   |   | x | x | x | x |   |   |   |
| Cease all combustible tobacco use        |  |   |   |   |   |   |   |   |   |   | x |   |   |
| <b>Baseline Measurements:</b>            |  |   |   |   |   |   |   |   |   |   |   |   |   |
| Demographics                             |  | x |   |   |   |   |   |   |   |   |   |   |   |
| Tobacco Use History                      |  | x |   |   |   |   |   |   |   |   |   |   |   |
| Treatment History                        |  | x |   |   |   |   |   |   |   |   |   |   |   |
| Cigarette Details                        |  | x | x |   |   |   |   |   |   |   |   |   |   |
| Medical History                          |  | x |   |   |   |   |   |   |   |   |   |   |   |
| Concomitant Medications                  |  | x | x | x | x | x | x | x | x | x | x | x | x |
| <b>Drug/Alcohol Measures:</b>            |  |   |   |   |   |   |   |   |   |   |   |   |   |
| Alcohol AUDIT-C                          |  | x |   |   |   | x |   |   |   |   | x |   | x |
| NIDA Quick Screen                        |  | x |   |   |   |   |   | x |   |   | x |   | x |
| <b>Adverse events:</b>                   |  |   |   |   |   |   |   |   |   |   |   |   |   |
| AE Trigger Question                      |  |   | x | x | x | x | x | x | x | x | x | x | x |
| AE Log                                   |  |   | x | x | x | x | x | x | x | x | x | x | x |
| <b>Cigarette Measures:</b>               |  |   |   |   |   |   |   |   |   |   |   |   |   |
| MNWS                                     |  |   | x | x | x | x | x | x | x | x | x | x | x |
| Confidence to Quit                       |  |   |   |   |   |   |   |   |   |   | x | x | x |
| Stage of Change                          |  |   |   |   |   |   |   |   |   |   | x | x | x |
| Environmental Smoke                      |  |   | x |   |   |   |   |   |   |   | x |   | x |
| Smoking Urges                            |  |   | x | x | x | x | x | x | x | x | x | x | x |
| 7-day TLFB & Current Tobacco Use         |  |   | x | x | x | x | x | x | x | x | x | x | x |
| <b>Cigarette Dependence</b>              |  |   |   |   |   |   |   |   |   |   |   |   |   |
| Cigarette Dependence                     |  |   | x | x | x | x | x | x | x | x | x | x | x |
| <b>Study Product Dependence</b>          |  |   |   |   |   |   |   |   |   |   |   |   |   |

|                                                        |   |  |   |   |   |   |   |   |   |   |   |   |   |   |
|--------------------------------------------------------|---|--|---|---|---|---|---|---|---|---|---|---|---|---|
| E-Cigarette Dependence Scale (if product = ecig)       |   |  |   | x | x | x | x | x | x | x | x | x | x | x |
| Non-Study E-Cigarette Dependence Scale                 |   |  |   | x | x | x | x | x | x | x | x | x | x | x |
| Cig Substitute Dependence Scale (if product = cig sub) |   |  |   | x | x | x | x | x | x | x | x | x | x | x |
| E-Cigarette Patterns of Use (if product = ecig)        |   |  |   | x | x | x | x | x | x | x | x | x | x | x |
| <b>Study Product Measures:</b>                         |   |  |   |   |   |   |   |   |   |   |   |   |   |   |
| Study Product Side Effects                             |   |  |   | x | x | x | x | x | x | x | x | x | x | x |
| Study Product Evaluation                               |   |  |   | x | x | x | x | x | x | x | x | x | x | x |
| Study Product Trigger                                  |   |  |   | x | x | x | x | x | x | x | x | x | x | x |
| Study Product Dispensed Log                            |   |  | x | x | x | x | x | x | x | x | x |   |   |   |
| <b>Psych Measures:</b>                                 |   |  |   |   |   |   |   |   |   |   |   |   |   |   |
| Kessler 6                                              |   |  | x |   |   | x | x |   | x |   | x |   |   | x |
| Perceived Stress                                       |   |  | x |   |   | x | x |   | x |   | x |   |   | x |
| CES-D                                                  |   |  | x |   |   | x | x |   | x |   | x |   |   | x |
| <b>Health Measures:</b>                                |   |  |   |   |   |   |   |   |   |   |   |   |   |   |
| Interheart                                             |   |  | x |   |   |   |   |   |   |   |   | x |   | x |
| Clinical COPD Questionnaire                            |   |  | x |   |   |   |   |   |   |   |   | x |   | x |
| <b>Biomeasures:</b>                                    |   |  |   |   |   |   |   |   |   |   |   |   |   |   |
| Pulmonary Function Test                                |   |  | x |   |   | x |   | x |   |   |   | x |   | x |
| CO                                                     | x |  | x | x | x | x | x | x | x | x | x | x | x | x |
| Waist/Hip Ratio                                        |   |  | x |   |   |   |   |   |   |   |   | x |   | x |
| Vitals (HR/BP)                                         | x |  | x | x | x | x | x | x | x | x | x | x | x | x |
| Height                                                 |   |  | x |   |   |   |   |   |   |   |   |   |   |   |
| Weight                                                 |   |  | x | x | x | x | x | x | x | x | x | x | x | x |
| <b>Exhaled Breath Condensate Samples:</b>              |   |  | x |   |   | x |   | x |   |   |   | x |   |   |
| Oxidative Stress - 8 Isoprostanes & other biomarkers   |   |  | x |   |   | x |   | x |   |   |   | x |   |   |
| <b>Blood Samples:</b>                                  |   |  |   |   |   |   |   |   |   |   |   |   |   |   |
| Complete Metabolic Panel                               |   |  | x |   |   |   |   |   |   |   |   | x |   |   |

|                                            |   |   |   |  |  |   |  |   |  |  |   |  |   |
|--------------------------------------------|---|---|---|--|--|---|--|---|--|--|---|--|---|
| Hematology Panel                           |   |   | x |  |  |   |  |   |  |  | x |  |   |
| Lipid Panel                                |   |   | x |  |  |   |  |   |  |  | x |  |   |
| C-Reactive Protein                         |   |   | x |  |  |   |  |   |  |  | x |  |   |
| Oxidative Stress - Glutathione             |   |   | x |  |  | x |  | x |  |  | x |  |   |
| <b>Urine Samples:</b>                      |   |   |   |  |  |   |  |   |  |  |   |  |   |
| Pregnancy Test                             |   | x |   |  |  |   |  |   |  |  |   |  |   |
| Cotinine                                   |   |   | x |  |  | x |  | x |  |  | x |  |   |
| NNAL                                       |   |   | x |  |  | x |  | x |  |  | x |  |   |
| Oxidative Stress - 8 Isoprostanes & 8-OHdG |   |   | x |  |  | x |  | x |  |  | x |  |   |
| <b>Other:</b>                              |   |   |   |  |  |   |  |   |  |  |   |  |   |
| Screener 1                                 | x |   |   |  |  |   |  |   |  |  |   |  |   |
| Screener 2                                 | x |   |   |  |  |   |  |   |  |  |   |  |   |
| Screener 3                                 |   | x |   |  |  |   |  |   |  |  |   |  |   |
| End of trial form                          |   |   |   |  |  |   |  |   |  |  |   |  | x |

**Section 4: Statistical Principles**

**4.1. Level of statistical significance and adjustment for multiplicity**

All statistical tests will be two-sided. The allowed type I error rate is set at 0.05. P-values less than 0.05 will be considered statistically significant, with the exception of the post-hoc analysis of primary outcome between any two research interventions, where p-values less than 0.008 will be considered significant based on Bonferroni corrections for multiple comparison adjustment.

All analyses will be completed using the intent-to-treat (ITT) approach to avoid the bias associated with the non-random loss of participants for the real life intervention effect.

Per-protocol (PP) analysis will also be conducted for the participants who adhered to the study protocol (attended and provided data at Visits 2, 5, 7, and 10) to estimate the true efficacy. Methods for handling missing data will be specified below.

**4.2. Confidence intervals to be reported**

A 95% Confidence Interval will be reported when appropriate.

**4.3. Protocol deviations**

4.3.1. Definition of protocol deviations and violations for the trial

**Protocol deviations** are situations where activities of the study diverge from the IRB approved study protocol. They may be accidental or unintentional changes to, or non-compliance with the study protocol that does not increase the risk or decrease the benefit to the participant. It also does not have an effect on the participant's rights, safety, welfare and/or integrity of the data. Deviations may result from the action of the subject, researcher or research staff.

Protocol deviations may not be reportable to the IRB but should be documented in REDCap on the Protocol Deviations Violations form.

**The following will be considered Protocol Deviations throughout the study:**

- **Training:**
  - Study staff who has not been fully trained on study procedures completes visits
- **Researcher oversight:**
  - Study visit offered to a participant that is outside a study window (this does not include a rescheduled visit that is scheduled outside the window due to a conflict in the participant's schedule)
  - Failure on the part of the researcher to collect subject data or specimens (this does not include incidents that are out of the researchers control, i.e. a participant refuses or leaves unexpectedly)

- Failure to give participants study visit payment
- **Blood/urine samples:**
  - Pregnancy test was not performed on visit dates where required
  - Blood or urine was collected but not documented in REDCap or the specimen logs
  - Blood was not processed and frozen within the 2 hour time window
  - Blood samples were improperly labeled, logged, and/or packaged when shipped but did not result in lost or unidentifiable samples
- **Clinic procedures:**
  - Incorrect information was entered into spirometry software yielding incorrect predicted values
- **Participants:**
  - Subject refuses to complete research activities that they have otherwise consented to (questionnaires, blood/urine collection etc.)
- **Confidentiality:**
  - Inclusion of identifying information on sample shipments
- **Study Product:**
  - Cartomizers given to participant after expiration date

**Protocol violations** are more serious and may reduce the quality or completeness of the data, make the informed consent inaccurate or impact the participant's safety, rights or welfare.

Protocol violations **are reportable to the PSU IRB** and if they result in an **unanticipated problem are reportable to the VCU IRB**.

**The following will be considered protocol violations throughout the trial:**

- **Confidentiality:**
  - Breaches of confidentiality resulting from lost, misplaced, or stolen study documents (e.g., a consent form is missing)
  - Inclusion of identifying information on sample shipments
- **Consent form:**
  - Failure to obtain valid informed consent prior to any study-specific tests/procedures
  - Missing signature or date from either participant or researcher
  - Outdated or incorrect consent form used
- **Randomization:**
  - A participant is consented into the study who does not meet initial inclusion/exclusion criteria
  - Participant is entered into randomization phase prior to determining final compliance criteria
- **IRB:**
  - Unreported SAEs to the IRB within 5 days
  - Approvals not current, suspended or terminated
  - Enrollment occurs during a period when study is "on hold"
  - Enrollment over the IRB approved enrollment total
- **Tests/Samples:**
  - Incorrect or missing tests (PFT, blood, EBC or urine samples) that were documented as complete
  - Mishandled samples: Blood, urine, or EBC samples were not labeled, logged, and/or packaged properly when shipped resulting in lost samples
- **Safety:**
  - Participant was allowed to continue with the study after a positive pregnancy test
  - Participant was given study product when withdrawal criteria was met
  - Participant was allowed to continue with the study after any other hard withdrawal criteria are met
- **Participants:**
  - Visits are repeatedly scheduled outside study windows
- **Data Collection:**
  - Phone and/or survey contacts were not attempted as scheduled due to researcher oversight

#### 4.3.2. Description of which protocol deviations will be summarized

Percentages of protocol deviations related to research oversight, blood/urine samples, clinic procedures, and study products will be summarized by site and by conditions.

### 4.4. Analysis populations

4.4.1. The primary analysis of all endpoints will adhere to the ITT principle, while PP analysis will also be considered to provide additional insights about true efficacy. Under the ITT principle, all randomized subjects will be included in the analysis in the group to which they were randomized, regardless of protocol violations and compliance to treatment assignment; while the PP analysis will be restricted to those participants who adhered to the study protocol.

#### 4.4.2. Subgroup populations

None are planned.

## Section 5: Trial Population

### 5.1. Screening Data and Eligibility

Participant screening data (collected via phone via a pre-screener and in-person at Visit 1) will be reported for all items related to primary inclusion and exclusion criteria. Inclusion and exclusion eligibility criteria are described below.

#### Inclusion Criteria

- Age 21-65
- Smoke >9 cigarettes per day for at least 1 year
- Smoke regular filtered cigarettes or machine-rolled cigarettes with a filter
- CO measurement >9 ppm at baseline
- No serious quit attempt in the prior 1 month. This includes use of any FDA approved smoking cessation medication (varenicline, bupropion [used specifically as a quitting aid], patch, gum, lozenge, inhaler, and nasal spray) in the past 1 month as an indication of treatment seeking.
- Not planning to quit in the next 6 months
- Interested in reducing cigarette consumption
- Willing to attend visits weekly and monthly over a 9-month period (not planning to move, not planning extended vacation, no planned surgeries)
- Read and write in English
- Able to understand and consent

#### Exclusion Criteria

- Pregnant and/or nursing women
- Unstable or significant medical condition in the past 12 months (Recent heart attack or some other heart conditions, stroke, severe angina including high blood pressure if systolic >159 or diastolic >99 observed during screening).
- Severe immune system disorders (uncontrolled HIV/AIDS; unstable multiple sclerosis symptoms), respiratory diseases (exacerbations of asthma or COPD, require oxygen, require oral prednisone), kidney (dialysis) or liver diseases (cirrhosis), or any medical disorder/medication that may affect participant safety or biomarker data.
- Use of any non-cigarette nicotine delivery product (pipe, cigar, dip, chew, snus, hookah, ECIGs, strips, sticks) in the past 7 days
- Uncontrolled mental illness or substance abuse or inpatient treatment for these in the past 6 months
- History of difficulty providing or unwilling to provide blood samples (fainting, poor veins, anxiety)
- Surgery requiring general anesthesia in the past 6 weeks
- Use of an ECIG for 5 or more days in the past 28 days or any use in the past 7 days
- Use of marijuana or any illicit drug/prescription drugs for non-medical use daily/almost daily or weekly in the past 3 months per NIDA Quick Screen
- Use of hand-rolled, roll your own cigarettes
- Known allergy to propylene glycol or vegetable glycerin
- Other member of household participated in the study

### 5.2. Recruitment

The CONSORT flow diagram for the study will include the proportion of the sample assessed for eligibility via the pre-screener, eligible/ineligible for Visit 1, attended/excluded/eligible at Visit 1, attended/excluded/randomized at Visit 2, study condition/arm assigned at Visit 2, and for Visits 3-12 attended/no-show/withdrawn (reason for withdrawal) by study condition/arm assigned.

### 5.3. Withdrawal/follow-up

Withdrawal from the study will be defined using the end of trial form (PI decision, participant decision to withdraw, withdrawal for serious adverse event). Sub-categories for each type of withdrawal will be presented by study condition assigned and by site.

### 5.4. Baseline participant characteristics

Baseline characteristics to be summarized include demographics (age, sex, race, ethnicity, education, employment status, total household income, marital status), tobacco use characteristics (average cigarettes smoked per day, years smoking, age of cigarette smoking initiation, ever use of other tobacco products, menthol status, PSU Cigarette Dependence Scale score, Visit 2 average cigarettes per day), and psychosocial/health characteristics (AUDIT score, Environmental Smoke Score, Kessler K6 Score, Perceived Stress Score, CES-D Score, Interheart Score, Clinical COPD Score), physiological measures (waist circum, hip circum, heath, weight, BMI, BP, Pulse, FEV1, FVC, urine cotinine, urine NNAL, and expired air CO).

## Section 6: Analysis

### 6.1. Outcome definitions and timing

- Primary outcome: The primary outcome measure of this RCT is the urinary concentration of the carcinogen biomarker of tobacco exposure, total NNAL (linear range: 20 to 20,000 pg/mL or 0.020 to 20 ng/mL. Results will be presented adjusted for creatinine

concentration (pg/ng per mg creatinine). This outcome is measured at Visit 2 (Week 0), Visit 5 (Week 4), Visit 7 (Week 12), and Visit 10 (Week 24).

- Secondary outcomes:
  - o Cotinine concentration will be measured via urine sample (linear range: 1000 to 3,000,000 pg/mL or ng/mL or 1-3000 ng/mL). Results will be presented adjusted for creatinine concentration (pg/ng per mg creatinine). This outcome is measured at Visit 2 (Week 0), Visit 5 (Week 4), Visit 7 (Week 12), and Visit 10 (Week 24).
  - o Total glutathione will be measured via blood sample (linear range information unavailable). This outcome is measured at Visit 2 (Week 0), Visit 5 (Week 4), Visit 7 (Week 12), and Visit 10 (Week 24).
  - o 8-Isoprostanes will be measured via urine sample (linear range information unavailable). Results will be presented unadjusted and adjusted for creatinine concentration (pg/ng per mg creatinine). This outcome is measured at Visit 2 (Week 0), Visit 5 (Week 4), Visit 7 (Week 12), and Visit 10 (Week 24).
  - o 8-Isoprostanes will be measured via exhaled breath condensate sample (linear range information unavailable). This outcome is measured at Visit 2 (Week 0), Visit 5 (Week 4), Visit 7 (Week 12), and Visit 10 (Week 24).
- Exploratory outcomes (timing varies between Visit 1-12):
  - o From Aim 1
    - Exhaled CO
    - Heart rate/blood pressure
    - Spirometry outcomes
    - 8-OHdG in urine samples
    - Other oxidative stress markers in exhaled breath condensate samples.
    - Blood lab results
  - o From Aim 2
    - Adverse events profile
      - By overall frequency, by relatedness category, severity, and by system affected
    - Study Product Side Effects
    - Study Product Evaluation
    - Minnesota Nicotine Withdrawal Scale (MNWS)
    - Questionnaire of Smoking Urges
  - o From Aim 3
    - 7-day TLFB form
      - Cigarettes smoked per day (7-day average)
      - Study product use per day (7-day average)
      - Study product cartomizers dispensed/used returned
      - 50% reduction in cigarettes smoked (defined as 50% reduction of Visit 1 self-reported CPD; yes/no)
      - 75% reduction in cigarettes smoked (defined as 50% reduction of Visit 1 self-reported CPD; yes/no)
      - Study product abstinence
        - o 24-hour use (available at Visits 3-12; yes/no)
      - Cigarette smoking abstinence (defined as 0 cigarettes smoked via 7-day average and expired air CO <10 at the same visit; SRNT Subcommittee, 2002)
        - o 24-hour point prevalence cigarette smoking abstinence (available at Visits 3-12; yes/no)
        - o 7-day point prevalence cigarette smoking abstinence (available at Visits 3-12; yes/no)
        - o 28-day point prevalence cigarette smoking abstinence (available at Visits 6-11; yes/no)
      - Other tobacco use
        - o For each product reported 7-day average
        - o Summary across products 7-day average
    - Cigarette Dependence Scale
    - Non-Study E-Cigarette Dependence Scale
    - Cigarette Substitute Dependence Scale
    - E-Cigarette Dependence Scale
    - E-Cigarette Patterns of Use
    - Study Product Dispensed Log
  - o Other outcomes
    - AUDIT-C
    - CES-D
    - Clinical COPD Questionnaire
    - Perceived Stress
    - Kessler K6
    - Interheart
    - Environmental Smoke Questionnaire

6.1.2. Any calculation or transformation used to derive the primary and secondary outcomes (i.e., change from baseline)

None planned other than corrected/non-corrected values for creatinine where applicable and potential transformation for outcomes that do not meet model assumptions such as normality.

6.1.3. Any calculation or transformation used to derive the exploratory outcomes (i.e., change from baseline)



Changes from baseline may be calculated for some exploratory analyses as needed. Sum scores of MPSS, FTND, PSCDI, HONC, AUDIT-C, MNWS-R, Perceived Stress, Kessler 6, CES-D, Interheart and Clinical COPD will be calculated. Level of exposure to environmental smoke will be categorized based on the responses from the environmental smoke questionnaire. Averages of 7-CPD/study product use will be calculated based on the 7-day TLFB form (please note days that overlap in the 7-day TLFB will be dropped from the more recent visit).

## **6.2. Analysis methods**

### **6.2.1. Primary and Secondary Analyses**

We will first examine baseline demographics described above to identify any baseline imbalances after randomization. Discrete variables will be summarized by frequencies with percentages and compared using Chi-squared test or Fisher's exact test when appropriate. Continuous covariates will be summarized by mean with standard deviation, or median with range, and compared using one-way ANOVA or Kruskal-Wallis test. We expect groups to be balanced for important baseline demographics due to the nature of RCT.

Our primary endpoint, urine NNAL concentration, will be summarized by study intervention and timepoint and analyzed using linear mixed models (between-subjects factor: study condition/arm; within-subjects factor: visit, 2, 5, 7, 10), and we will adjust the type I error rate to account for 6 pairwise comparisons between study conditions/arms over time, and at each time point. We will compare each ECIG group to the cigarette substitute and then each ECIG group to the other. An analogous approach will be used to analyze our secondary endpoints. The analyses of our secondary endpoints will primarily use one-way ANOVA at different timepoint with similar multiple comparison adjustments.

Secondary data analyses will consist of adjusted analyses including age, gender, race, and possibly for other covariate imbalance (including by site) with the use of linear mixed models.

### **6.2.2. Any adjustment for covariates**

A secondary analysis (as described above) will be completed adjusting for age, gender, race, along with any other covariates that significantly differ across study conditions at baseline, or any other covariates particularly relevant to the primary/secondary outcomes. A stepwise model selection will be performed to finalize the list of covariates to be included in the final model.

### **6.2.3. Methods used for assumptions to be checked for statistical methods**

Data normality will be confirmed by using graphical methods including quantile-quantile plot (QQ plot) and Kolmogorov-Smirnov test.

### **6.2.4. Details of alternative methods to be used if distributional assumptions do not hold**

Skewed continuous variables will be log-transformed or Box-Cox transformed as appropriate.

## **6.3. Safety**

The distinction between the primary/secondary outcomes and safety outcomes is not as clear in this trial as it would be in a typical clinical trial of a novel therapeutic agent. Many outcomes that would typically be considered potential adverse consequences or safety outcomes will be analyzed as the secondary or exploratory outcomes as described above.

AEs and SAEs will be recorded as described in the Adverse Event SOP. AEs will be tabulated and compared across treatment groups in the exploratory analyses. We expect study product-related SAEs to be rare and, therefore, no formal statistical comparison for this AE category is planned for this trial.

## **6.4. Missing data**

An ITT analysis includes subjects that are allocated according to their random intervention assignment, regardless of compliance to the study product, and that complete data are available on all study subjects. Every effort will be made to limit the amount of missing data in this trial. Study participants will be incentivized to attend study sessions and provide biological samples and other measurements as detailed in the study protocol. However, some level of missing data is inevitable in a study of this kind. In response, we will complete a sensitivity analysis for the primary and secondary endpoints in order to evaluate the robustness of our conclusions to missing data.

We will compare subjects with and without missing primary outcome data in order to identify baseline covariates associated with missing data. There are three possible scenarios of missing data in our study: (1) primary outcome measurements missing while covariate measurements completely available, (2) primary outcome measurements available but some measurements in covariates missing, and (3) both primary outcome and some covariate measurements missing. Our primary approach to handling missing data in scenario 1 and 2 will be multiple imputation where missing values are imputed using conditional regression models developed from baseline covariates (Little & Rubin, 2002) and/or available outcomes. Our strategy to handle missing data in scenario 3 is multiple imputation through joint conditional specification (Schafer, 1997).

In addition, we will conduct a series of sensitivity analyses of the primary and secondary endpoints using baseline-carried-forward and last-observation carried forward. The results of these analyses will be compared to the primary analysis to evaluate the robustness of our conclusions.

Note that we intent to examine the potential differential dropout or attrition between interventions and study sites. If there is information suggesting data missing are not at random, e.g., the dropout rates are evidently different between interventions or sites, multiple imputation model equations should not incorporate intervention or site variable. Alternatively, multiple imputation may be carried out one intervention at a time, or one site at a time, respectively (Li, Stuart, & Allison, 2015).

## 6.5. Additional analyses

Exploratory endpoints will be analyzed following a similar approach to what has been proposed for the primary and secondary endpoints. Continuous and binary endpoints will be analyzed using an ANOVA, linear regression, or logistic regression, respectively, and secondary data analyses will be performed using linear mixed models or generalized linear mixed models, as appropriate. Skewed continuous endpoints will be log-transformed and analyzed on the log-scale for analysis. Time-to-event endpoints will be analyzed using Cox proportional hazards model. The primary analysis of all endpoints will be without adjustment for baseline covariates.

The secondary analysis will be completed adjusting for age, gender, and race, along with any other covariates that differ significantly across study conditions at baseline, or any other covariates particularly relevant to the exploratory outcomes (including by site). A stepwise model selection will be performed to finalize the covariates to be included in the final model.

Handling of missing data for exploratory endpoints may or may not utilize multiple imputation (as described for the primary and secondary endpoints), but all exploratory endpoint analyses will include sensitivity checks to examine the robustness of the conclusions drawn with respect to the effects of missing data.

More specific exploratory analyses include:

- 1) An exploratory analysis of the primary, secondary, and exploratory endpoints will involve recoding of the study condition assignment into a three-level variable: cigarette substitute s. ECIG+0 mg/ml nicotine vs. ECIG+8/36 mg/ml nicotine (i.e., the two nicotine containing conditions will be collapsed).
- 2) An exploratory analysis of the primary, secondary, and exploratory endpoints will involve adding the use of other tobacco products (combustible/non-combustible) as a covariate (assessed at each study visit).
- 3) An exploratory analysis of the primary, secondary, and exploratory endpoints will involve adding the current cigarette smoking and/or cigarette dependence scale score as a covariate (assessed at each study visit).
- 4) An exploratory analysis of the primary, secondary, and exploratory endpoints by site (VCU vs. PSU) due to anticipated demographic heterogeneity in the population recruited.
- 5) An exploratory analysis of the primary, secondary, and exploratory endpoints by study product adherence status (i.e., use of study product at subsequent visits following randomization).

## 6.6. Statistical software

All analysis will be completed using SAS (v.9.4).

## 6.7. References

Breland AB, Kleykamp BA, Eissenberg T. Clinical laboratory evaluation of potential reduced exposure products for smokers. *Nicotine Tob Res.* 2006 Dec;8(6):727-38.

Gamble C, Krishan A, Stocken D, Lewis S, Juszcak E, Doré C, Williamson PR, Altman DG, Montgomery A, Lim P, Berlin J, Senn S, Day S, Barbachano Y, Loder E. Guidelines for the Content of Statistical Analysis Plans in Clinical Trials. *JAMA.* 2017 Dec 19;318(23):2337-2343. doi: 10.1001/jama.2017.18556.

Li P, Stuart EA, Allison DB. Multiple Imputation: A Flexible Tool for Handling Missing Data. *JAMA.* 2015 Nov 10;314(18):1966-7. doi: 10.1001/jama.2015.15281.

Little RJA, Rubin DB. *Statistical Analysis with Missing Data*, 2nd ed. Wiley, New York: 2002.

Lopez AA, Cobb CO, Yingst JM, Veldheer S, Hrabovsky S, Yen MS, Foulds J, Eissenberg T. A transdisciplinary model to inform randomized clinical trial methods for electronic cigarette evaluation. *BMC Public Health.* 2016 Mar 3;16:217. doi: 10.1186/s12889-016-2792-8

Schafer JL. *Analysis of Incomplete Multivariate Data*. Chapman and Hall, London: 1997.

SRNT Subcommittee on Biochemical Verification. Biochemical verification of tobacco use and cessation. *Nicotine Tob Res.* 2002 May;4(2):149-59.

Per the Lopez et al. BMC Public Health (2016) 16:217 DOI 10.1186/s12889-016-2792-8

#### Aim

The specific aims of the RCT are to:

1. Characterize ECIG influence on toxicants, biomarkers, health indicators, and disease risk. We will measure exposure to the carcinogenic nitrosamine 4-(methylnitrosamino)-1-(3-pyridyl)-1-butanone [NNK; via its metabolite NNAL (4-(methylnitrosamino)-1-(3-pyridyl)-1-butanol) in urine], expired air carbon monoxide (CO), and nicotine (via its metabolite cotinine in urine). We will also measure heart rate and blood pressure, biochemical and hematologic health indices, pulmonary function (via spirometry), and biomarkers of oxidative stress. With respect to toxicant exposure, we hypothesize that, relative to the cigarette substitute condition, we will observe ECIG liquid nicotine concentration-related decreases in urine NNAL and expired air CO concentration.
2. Determine the tobacco abstinence symptom and adverse event profile associated with real-world ECIG use. We will use standard measures of nicotine/ tobacco abstinence symptoms to characterize the extent to which ECIG-induced suppression of abstinence symptoms is related to nicotine concentration. With respect to other adverse events, we will assess effects likely attributable to inhalation of propylene glycol and nicotine self administration.
3. We hypothesize more of these propylene glycol-related adverse events with ECIGs relative to the cigarette substitute condition. Examine the influence of ECIG use on conventional tobacco product use. We will monitor ECIG and all other tobacco/nicotine product use closely, via daily tobacco use diaries and in-person assessments. Because we are targeting individuals interested in reducing their cigarette intake, we hypothesize that individuals randomized to higher ECIG nicotine concentrations (8 mg/ml or 36 mg/ml) will experience reductions in combustible cigarette use.

#### Primary outcome

The primary outcome measure of this RCT is the urinary concentration of the carcinogen biomarker of tobacco exposure, NNAL.

#### Secondary outcomes

The secondary outcome measure will be urine cotinine concentration. Markers of oxidative stress (Glutathione and 8-Isoprostanes) are additional secondary outcome measures. Glutathione will be measured via blood sample analysis. 8-Isoprostanes will be measured via both urine sample and exhaled breath condensate analyses.

#### Sample size

RCT power is based on the important biomarker of toxicant exposure, NNAL concentration in urine. Unfortunately, there are no data that reveal the NNK exposure in ECIG users, as that study has not yet been performed. However, we do have data showing how NNAL concentration in novel tobacco product users compares to own brand cigarette use [49]. Using these data, power analysis revealed 100 completers per condition would provide an 80 % power to detect an effect size of 0.28 pmol/ml (SD = 0.6 pmol/ml) on NNAL. We aim to enroll 130 participants per condition anticipating a 20 % attrition rate.

#### Statistical analysis

The analysis plan is based on the primary objective of determining the extent to which ECIG nicotine concentration influences NNK exposure as indexed by urinary NNAL concentration. We will first examine baseline characteristics including demographics and smoking history across study interventions to identify any baseline imbalances after randomization. Discrete variables will be summarized by frequencies and percentages and compared using Chisquared test or Fisher's exact test. Continuous covariates will be summarized by mean, standard deviation, median and range, and compared by one-way ANOVA. Skewed continuous variables will be log-transformed or square root transformed as appropriate. We expect groups to be balanced for important baseline characteristics due to randomization.

A secondary analysis will be completed adjusting for age, gender, and race, along with any other covariates that differ across research interventions at baseline with a p-value less than 0.20. P-values less than 0.05 will be considered statistically significant with the exception of analysis of our primary analysis, where p-values less than 0.008 will be considered significant after a Bonferroni multiple comparisons adjustment.

Our primary endpoint, urine NNAL concentration, will be summarized by study intervention and time and analyzed using linear regression, and we will adjust the Type I error rate to account for 6 pairwise comparisons at each time point. We will compare each ECIG group to the cigarette substitute and then each ECIG group to the other. An analogous approach will be used to analyze our secondary endpoints. The primary analysis of our secondary endpoints will use linear regression.

Secondary analyses will consist of an adjusted analysis and a repeated measures analysis using a linear mixed model. All analysis will be completed using SAS (v.9.4) under the expertise of a senior biostatistician.

PER VCU approved protocol (dated 10/29/2014; approved by IRB 12/01/2014)

## Statistical Plan

### 7.0 Sample size determination

We chose to power our RCT based on the important biomarker of toxicant exposure, NNAL concentration in urine. Unfortunately, there are no data that reveal the NNK exposure in electronic cigarette users, as that study has not yet been performed. However, we do have data showing how NNAL concentration in novel tobacco users compares to own brand use. Using these data, and the knowledge that we would be conducting two sample t-tests at the .008 level to control for 6 pairwise comparisons we worked with the biostatistics team to conduct a power analysis. That analysis revealed that 100 completers per condition would provide an 80% power to detect an effect size of .28. We have chosen therefore to enroll 130 participants in each condition, in anticipation of a ~20% attrition rate (Note: We will limit attrition by replacing participants before randomization).

### 7.1 Statistical methods

Our analysis plan is based on the primary objective of determining the extent to which ECIG dose influences NNK exposure as indexed by urine NNAL level. We will first examine baseline characteristics including demographics and smoking history across research interventions to identify any baseline imbalances after randomization. Discrete variables will be summarized by frequencies and percentages and compared using Chi-squared test of Fisher's exact test. Continuous covariates will be summarized by mean, standard deviation, median and range, and compared by one-way ANOVA. Skewed continuous variables will be log-transformed or square root transformed as appropriate. We expect groups to be balanced for important baseline characteristics due to randomization. A secondary analysis will be completed adjusting for age, gender, and race, along with any other covariates that differ across research interventions at baseline with a p-value less than .20. P-values less than .05 will be considered statistically significant with the exception of analysis of our primary analysis, where p-values less than .008 will be considered significant after a Bonferroni multiple comparisons adjustment. Our primary endpoint, urine NNAL level, will be summarized by research intervention and time and analyzed using linear regression and we will adjust the Type 1 error rate to account for 6 pairwise comparisons at each time point. We will compare each electronic cigarette group to the control and then each electronic cigarette group to the other. An analogous approach will be used to analyze our secondary endpoints. The primary analysis of our secondary endpoints will use linear regression. Secondary analyses will consist of an adjusted analysis and a repeated measures analysis using a linear mixed model. All analysis will be completed using SAS (v.9.3).

## References

- 1 Lopez AA, Cobb CO, Yingst JM, et al. A transdisciplinary model to inform randomized clinical trial methods for electronic cigarette evaluation. *BMC Public Health* 2016; **16**: 217.
- 2 Hiler M, Breland A, Spindle T, et al. Electronic cigarette user plasma nicotine concentration, puff topography, heart rate, and subjective effects: Influence of liquid nicotine concentration and user experience. *Exp Clin Psychopharmacol* 2017; **25**(5): 380-92.
- 3 Hughes JR, Hatsukami D. Signs and symptoms of tobacco withdrawal. *Arch Gen Psychiatry* 1986; **43**(3): 289-94.
- 4 Cox LS, Tiffany ST, Christen AG. Evaluation of the brief questionnaire of smoking urges (QSU-brief) in laboratory and clinical settings. *Nicotine Tob Res* 2001; **3**(1): 7-16.
- 5 Nondahl DM, Cruickshanks KJ, Schubert CR. A questionnaire for assessing environmental tobacco smoke exposure. *Environ Res* 2005; **97**(1): 76-82.
- 6 Foulds J, Veldheer S, Yingst J, et al. Development of a questionnaire for assessing dependence on electronic cigarettes among a large sample of ex-smoking E-cigarette users. *Nicotine Tob Res* 2015; **17**(2): 186-92.
- 7 Saunders JB, Aasland OG, Babor TF, de la Fuente JR, Grant M. Development of the Alcohol Use Disorders Identification Test (AUDIT): WHO Collaborative Project on Early Detection of Persons with Harmful Alcohol Consumption--II. *Addiction* 1993; **88**(6): 791-804.
- 8 National Institute on Drug Abuse. NIDA Quick Screen, Drug Screening Tool 2012. <https://www.drugabuse.gov/nmassist>. (accessed).
- 9 Kessler RC, Andrews G, Colpe LJ, et al. Short screening scales to monitor population prevalences and trends in non-specific psychological distress. *Psychol Med* 2002; **32**(6): 959-76.
- 10 Cohen S, Kamarck T, Mermelstein R. A global measure of perceived stress. *J Health Soc Behav* 1983; **24**(4): 385-96.
- 11 Radloff LS. The CES-D scale a self-report depression scale for research in the general population. *Appl Psychol Meas* 1977; **1**(3): 385-401.
- 12 Iqbal R, Anand S, Ounpuu S, et al. Dietary patterns and the risk of acute myocardial infarction in 52 countries: results of the INTERHEART study. *Circulation* 2008; **118**(19): 1929-37.
- 13 van der Molen T, Willemsse BW, Schokker S, ten Hacken NH, Postma DS, Juniper EF. Development, validity and responsiveness of the Clinical COPD Questionnaire. *Health Qual Life Outcomes* 2003; **1**: 13.
- 14 Hatsukami DK, Zhang Y, O'Connor RJ, Severson HH. Subjective responses to oral tobacco products: scale validation. *Nicotine Tob Res* 2013; **15**(7): 1259-64.
- 15 Van Buuren S. Multiple imputation of discrete and continuous data by fully conditional specification. *Statistical Methods in Medical Research* 2007; **16**: 219-242.
